# Supplementary material for: Landscape of the structure–O–H bond dissociation energy relationship of oximes and hydroxylamines
Source: Royal Society of Chemistry journal article supplement (doi:10.1039/c7cp03809g), 2017-01-01
Supplement: c7cp03809g1.pdf [file c7cp03809g1.pdf]

## Supporting information

# Landscape of Structure- O-H Bond Dissociation Energy Relationship of Oximes and Hydroxylamines

Rina Dao<sup>a</sup>, Xinyu Wang<sup>a</sup>, Kexian Chen<sup>b</sup>, Chenxuan Zhao<sup>a</sup>, Jia Yao<sup>a</sup>, Haoran Li<sup>\*, a, c</sup>

a. Department of Chemistry, ZJU-NHU United R&D Center, Zhejiang University, Hangzhou 310027,  
P. R. China

b. School of Food Science and Biotechnology, Zhejiang Gongshang University, Hangzhou, Zhejiang  
310018, PR China

c. State Key Laboratory of Chemical Engineering, College of Chemical and Biological Engineering,  
Zhejiang University, Hangzhou, 310027, P. R. China.

Content

1. Relationship between O-H BDE of *Z*-oximes and the inductive parameter (*F*) of the substituents, **Figure S1**.
2. Relationship between O-H BDE of *Z*-oximes and the resonance parameter (*R*) of the substituents, **Figure S2**.
3. Relationship between O-H BDE of hydroxylamines and the para-Hammett constants ( $\sigma$ ) of the substituents, **Figure S3**.
4. Relationship between O-H BDE of hydroxylamines and the inductive parameter (*F*) of the substituents, **Figure S4**.
5. Relationship between O-H BDE of hydroxylamines and the resonance parameter (*R*) of the substituents, **Figure S5**.
6. Gas phase BDEs of selected compounds calculated by B3LYP/6-311+G (d,p) with or without the D3BJ correction, **Table S1**.
7. Gas phase O-H BDEs calculated by different computational methods, **Table S2**.
8. Gas phase BDEs of alkyl hydroxylamines at UB3LYP/6-311+G(d,p) level and discrepancies from experiment, **Table S3**.
9. Gas phase and solution BDEs of acyl hydroxylamines at the UB3LYP/6-311+G(d,p) level and discrepancies from experiment, **Table S4**.
10. Gas phase BDEs of oximes at the UB3LYP/6-311+G(d,p) level and discrepancies from experiment, **Table S5**.
11. Gas phase and solution BDEs of entries 3, 20 and 21 calculated using different solvation model for single point energy, **Table S6**.
12. Predicted and calculated  $\Delta$ BDEs of unsymmetrically di-substituted oximes, **Table S7**.
13. BDEs of selected mono-substituted *E*-aldoximes in kcal/mol calculated by B2PLYP/6-311+G (d,p) method and CCSD/6-311+G (d,p) method, **Table S8**.

14. BDEs of mono-substituted hydroxylamines, **Table S9**.
15. BDEs Mono-substituted *E*- and *Z*-oximes, and resonance (R), and inductive (F) parameters of the substituents, **Table S10**.
16. Predicted and calculated  $\Delta$ BDEs of symmetrically di-substituted oximes, **Table S11**.
17. Predicted and calculated  $\Delta$ BDEs of di-substituted hydroxylamines, **Table S12**.
18. Total energy and Sum of electronic and thermal enthalpies of precursor and corresponding radicals.
19. Cartesian coordinates for selected compounds.

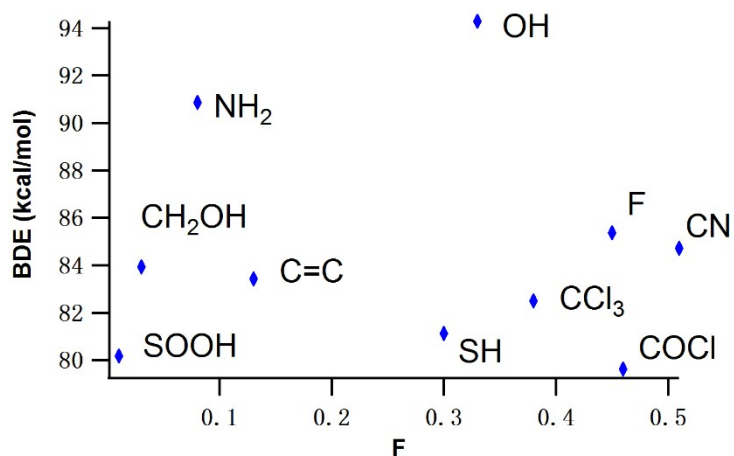

**Figure S1.** Relationship between O-H BDE of *Z*-oximes and the inductive parameter (F) of the substituents.

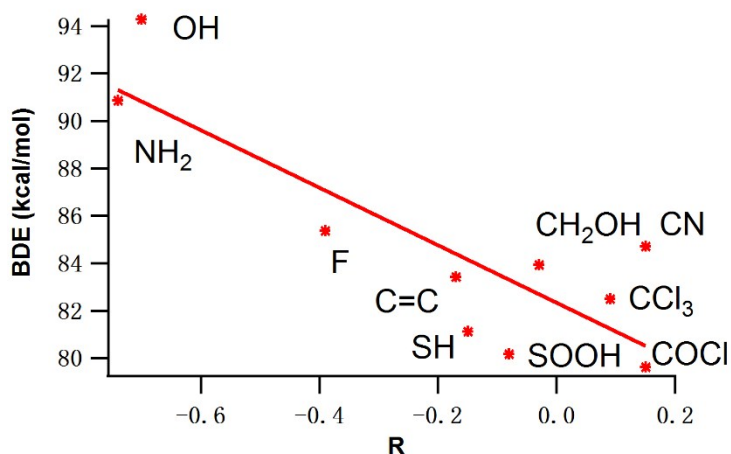

**Figure S2.** Relationship between O-H BDE of *Z*-oximes and the resonance parameter (R) of the substituents.

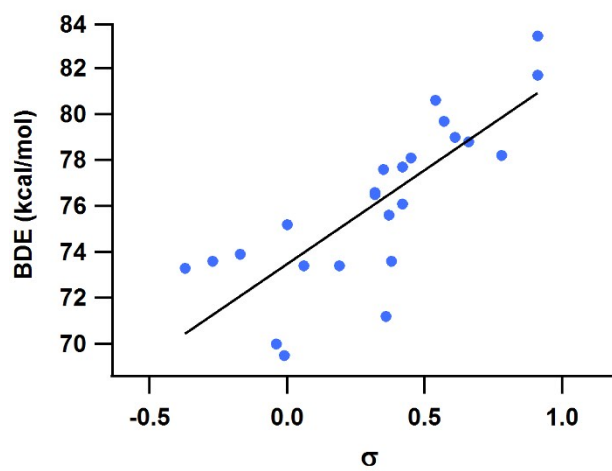

**Figure S3.** Relationship between O-H BDE of hydroxylamines and the para-Hammett constants ( $\sigma$ ) of the substituents.

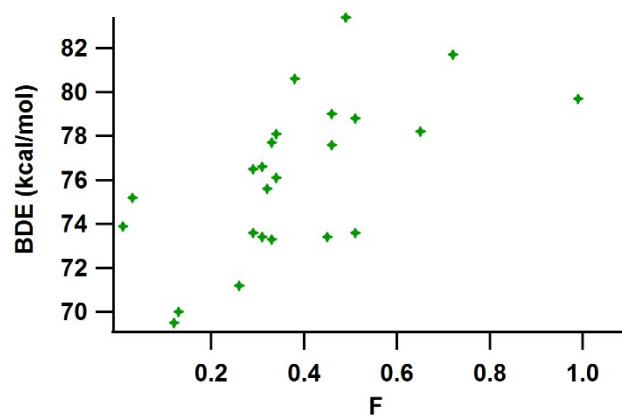

**Figure S4.** Relationship between O-H BDE of hydroxylamines and the inductive parameter (F) of the substituents.

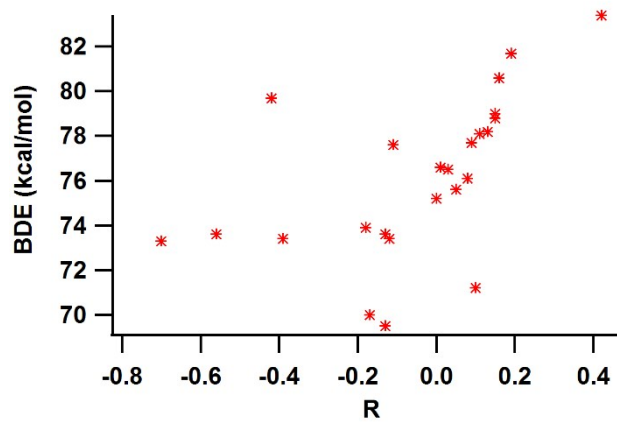

**Figure S5.** Relationship between O-H BDE of hydroxylamines and the resonance parameter (R) of the substituents.

**Table S1.** Gas phase BDEs of selected compounds calculated by B3LYP/6-311+G (d,p) with or without the D3BJ correction (units: kcal/mol).

| Entry | Structure                                                                           | B3LYP <sup>a</sup> | B3LYP-D3BJ |
|-------|-------------------------------------------------------------------------------------|--------------------|------------|
| 1     | 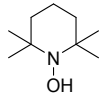   | 69.6               | 70.3       |
| 2     |    | 85.2               | 84.7       |
| 3     |    | 83.0               | 82.9       |
| 20    |   | 77.2               | 77.8       |
| 42    |  | 77.6               | 77.6       |
| 81    |  | 70.4               | 70.7       |
| 94    |  | 85.0               | 84.8       |
| 95    |  | 84.0               | 83.8       |
| 112   |  | 90.2               | 89.9       |
| 113   |  | 89.1               | 88.8       |
| 124   |  | 88.7               | 88.4       |
| 155   |  | 84.2               | 84.0       |
| 223   |  | 80.6               | 80.6       |

|     |  |      |      |
|-----|--|------|------|
| 104 |  | 80.5 | 79.8 |
| 120 |  | 85.6 | 85.5 |

**Table S2. Gas phase O-H BDEs calculated by different computational methods in kcal/mol.**

| Entry | Structure | Literature BDE                        |                               | Calculated BDE <sup>b</sup> |
|-------|-----------|---------------------------------------|-------------------------------|-----------------------------|
|       |           | Computational Method                  | Reaction <sup>a</sup> BDE     |                             |
| 4     |           | CBS-APNO                              | N 77.4 <sup>1</sup>           | 77.6                        |
| 5     |           | G2M                                   | N 81.2 <sup>2</sup>           | 77.8                        |
|       |           | B3LYP/6-311++G(2df,2pd)               | N 78.4 <sup>2</sup>           |                             |
| 1     |           | CCSD                                  | N 69.2 <sup>3</sup>           | 69.6                        |
|       |           | B3LYP/ EPR-III// B3LYP/ 6-311+G(d,p)  | I (entry 7) 69.5 <sup>3</sup> |                             |
| 7     |           | CCSD                                  | N 71.8 <sup>3</sup>           | 70.5                        |
|       |           | B3LYP/ EPR-III// B3LYP / 6-311+G(d,p) | N 64.8 <sup>3</sup>           |                             |
| 6     |           | G3B3                                  | N 83.2 <sup>4</sup>           | 83.5                        |
|       |           | CBS-APNO                              | N 82.7 <sup>4</sup>           |                             |
|       |           | G3B3                                  | I(avg.) 83.3±1.0 <sup>4</sup> |                             |
| 3     |           | G3B3                                  | N 83.0 <sup>4</sup>           | 83.0                        |
|       |           | G3B3                                  | I(avg.) 83.5±1.0 <sup>4</sup> |                             |
|       |           | B3LYP/6-311++G(2df,2pd)               | N 78.6 <sup>2</sup>           |                             |
|       |           | B3LYP/6-311+G(d)                      | N 80.9 <sup>5</sup>           |                             |
|       |           | B3LYP/6-311++G(d,p)                   | N 85.7 <sup>5</sup>           |                             |
|       |           | B3LYP/6-311++G(3df,3pd)               | I(phenol) 82.52 <sup>6</sup>  |                             |
|       |           | B3LYP/6-311+G(d)                      | I(phenol) 83.44 <sup>7</sup>  |                             |
| 95    |           | Corrected DFT <sup>c</sup>            | N 83.4                        | 84.0                        |
| 96    |           | ONIOM-G3B3 <sup>d</sup>               | N 85.9                        | 85.5                        |

| Entry | Structure | Literature BDE                             |                       |                   | Calculated BDE <sup>b</sup> |
|-------|-----------|--------------------------------------------|-----------------------|-------------------|-----------------------------|
|       |           | Computational Method                       | Reaction <sup>a</sup> | BDE               |                             |
| 97    |           | Corrected DFT <sup>c</sup>                 | N                     | 84.7              | 85.0                        |
|       |           | ONIOM-G3B3 <sup>d</sup>                    | N                     | 84.9              |                             |
|       |           | Corrected DFT <sup>c</sup>                 | N                     | 82.6              |                             |
| 94    |           | Corrected DFT <sup>c</sup>                 | N                     | 84.4              | 85.0                        |
| 98    |           | Corrected DFT <sup>c</sup>                 | N                     | 82.2              | 83.3                        |
|       |           | G3MP2                                      | N                     | 86.5 <sup>8</sup> |                             |
|       |           | G3                                         | N                     | 85.9 <sup>8</sup> |                             |
|       |           | CBS-QB3                                    | N                     | 85.1 <sup>8</sup> |                             |
| 99    |           | CBS-APNO                                   | N                     | 84.6 <sup>8</sup> | 85.8                        |
|       |           | (RO)B3LYP/6-311+G(2d,2p)/(U)B3LYP/6-31G(d) | N                     | 82.6 <sup>8</sup> |                             |
|       |           | Corrected DFT <sup>c</sup>                 | N                     | 83.8              |                             |
|       |           | ONIOM-G3B3 <sup>d</sup>                    | N                     | 83.0              |                             |
| 100   |           | Corrected DFT <sup>c</sup>                 | N                     | 83.8              | 84.6                        |
| 101   |           | ONIOM-G3B3 <sup>d</sup>                    | N                     | 83.0              | 82.1                        |
|       |           | Corrected DFT <sup>c</sup>                 | N                     | 82.7              |                             |
| 102   |           | ONIOM-G3B3 <sup>d</sup>                    | N                     | 83.0              | 81.5                        |
|       |           | Corrected DFT <sup>c</sup>                 | N                     | 81.5              |                             |
| 103   |           | ONIOM-G3B3 <sup>d</sup>                    | N                     | 79.0              | 78.5                        |
|       |           | Corrected DFT <sup>c</sup>                 | N                     | 77.6              |                             |
| 104   |           | ONIOM-G3B3 <sup>d</sup>                    | N                     | 78.7              | 80.5                        |
|       |           | Corrected DFT <sup>c</sup>                 | N                     | 77.2              |                             |
| 105   |           | ONIOM-G3B3 <sup>d</sup>                    | N                     | 78.3              | 79.5                        |

| Entry | Structure                                                                           | Literature BDE             |                           | Calculated BDE <sup>b</sup> |
|-------|-------------------------------------------------------------------------------------|----------------------------|---------------------------|-----------------------------|
|       |                                                                                     | Computational Method       | Reaction <sup>a</sup> BDE |                             |
|       |                                                                                     | Corrected DFT <sup>c</sup> | N 76.9                    |                             |
| 106   | 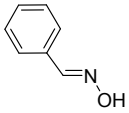   | Corrected DFT <sup>c</sup> | N 83.9                    | 84.5                        |
| 107   |    | Corrected DFT <sup>c</sup> | N 79.4                    | 81.4                        |
| 108   |    | Corrected DFT <sup>c</sup> | N 82.8                    | 83.6                        |
| 109   |    | Corrected DFT <sup>c</sup> | N 80.1                    | 81.6                        |
| 110   |   | ONIOM-G3B3 <sup>d</sup>    | N 81.8                    | 82.2                        |
|       |                                                                                     | Corrected DFT <sup>c</sup> | N 81.6                    |                             |
| 111   |  | ONIOM-G3B3 <sup>d</sup>    | N 80.4                    | 82.5                        |
|       |                                                                                     | Corrected DFT <sup>c</sup> | N 81.8                    |                             |

<sup>a</sup> The label “I” indicates an isodesmic reaction was used to calculate the BDEs referencing the compound in parentheses, and “N” means a non-isodesmic reaction. <sup>b</sup> UB3LYP/6-311+G(d,p) level of computation using an isodesmic reaction referencing the experiment BDE of phenol. <sup>c</sup> “Corrected DFT” indicate the data obtained by combination of the results of (RO)B3LYP/6-311+G(2d,2p)//(U)B3LYP/6-31G(d) with the difference between (RO)B3LYP/6-311+G(2d,2p)//(U)B3LYP/6-31G(d) and CBS-APNO in acetone oxime (entry 99) BDE. <sup>d</sup> “ONIOM-G3B3” is a multilayer composite ab initio method proposed by Fu et al. <sup>9</sup>



**Table S3. Gas phase BDEs of alkyl hydroxylamines calculated at the UB3LYP/6-311+G(d,p) level and their discrepancies from experiment values.**

| Entry | Structure                                                                           | Calculated BDE | Discrepancy <sup>a</sup>                                      | Entry           | Structure                                                                            | Calculated BDE | Discrepancy <sup>a</sup>                                       |
|-------|-------------------------------------------------------------------------------------|----------------|---------------------------------------------------------------|-----------------|--------------------------------------------------------------------------------------|----------------|----------------------------------------------------------------|
| 8     | 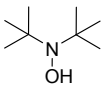   | 68.7           | -0.3 <sup>3</sup>                                             | 9               |     | 67.9           | -1.1 <sup>3</sup>                                              |
| 1     |    | 69.6           | 0.0 <sup>10</sup> , -0.5, <sup>3</sup> -<br>0.1 <sup>11</sup> | 7               |     | 70.5           | -1.3 <sup>10</sup> , -0.1 <sup>3</sup> ,<br>-1.4 <sup>11</sup> |
| 10    |    | 75.0           | -2.0 <sup>10</sup>                                            | 11              |     | 71.7           | -4.5 <sup>10</sup>                                             |
| 12    |   | 69.4           | -1.2 <sup>7</sup>                                             | 13 <sup>b</sup> |   | -              | -                                                              |
| 14    |  | 69.0           | -1.4 <sup>7</sup>                                             | 15              |  | 67.9           | -1.8 <sup>7</sup>                                              |

<sup>a</sup> When multiple experiment values are present, discrepancies from each data are listed besides their reference labels. <sup>b</sup> BDE of entry 13 is not calculated because of the large size of the molecule.

**Table S4. Gas phase and solution BDEs of acyl hydroxylamines calculated at the UB3LYP/6-311+G(d,p) level and their discrepancies from experiment values in kcal/mol.**

| Entry | Structure | Gas phase BDE | Discrepancies of gas phase BDE <sup>a</sup> | Solution BDE | Discrepancies of solution BDE <sup>a,b</sup> |
|-------|-----------|---------------|---------------------------------------------|--------------|----------------------------------------------|
| 16    |           | 72.2          | -4.6 <sup>12</sup>                          | 73.4         | -3.4 <sup>12</sup>                           |
| 17    |           | 73.3          | -2.9 <sup>12</sup>                          | 74.4         | -1.8 <sup>12</sup>                           |
| 18    |           | 73.0          | -2.8 <sup>12</sup>                          | 74.0         | -1.8 <sup>12</sup>                           |
| 19    |           | 74.2          | -6.0 <sup>13</sup>                          | 76.8         | -3.4 <sup>13</sup>                           |
| 20    |           | 77.2          | -2.0 <sup>13</sup>                          | 79.1         | -0.1 <sup>13</sup>                           |
| 21    |           | 73.4          | -3.8 <sup>12</sup> -6.5 <sup>14</sup>       | 75.1         | -2.1 <sup>12</sup> -4.8 <sup>14</sup>        |
| 22    |           | 71.3          | -3.1 <sup>12</sup>                          | 72.1         | -2.3 <sup>12</sup>                           |
| 3     |           | 83.0          | -6.6 <sup>14</sup> -5.1 <sup>13</sup>       | 83.9         | -5.7 <sup>14</sup> -4.2 <sup>13</sup>        |
| 23    |           | 76.5          | -2.0 <sup>13</sup>                          | 76.1         | -2.4 <sup>13</sup>                           |

<sup>a</sup> When multiple experiment values are present, discrepancies from each BDE are listed besides the reference label. <sup>b</sup> The solvents are: entries 16, 17, 18, 21, 22 CCl<sub>4</sub>, 3, 19, 20 BuOH, and 23 benzene, which are the solvents used in ref. <sup>12,13</sup>

**Table S5. Gas phase BDEs of oximes calculated at the UB3LYP/6-311+G(d,p) level and their discrepancies from experiment values in kcal/mol.**

| Entry | Structure | BDE  | Discrepancy <sup>a</sup>                                  | Entry | Structure | BDE  | Discrepancy <sup>a</sup>                                  |
|-------|-----------|------|-----------------------------------------------------------|-------|-----------|------|-----------------------------------------------------------|
| 99    |           | 85.8 | +1.5 <sup>b</sup> , -8.3 <sup>d</sup>                     | 101   |           | 82.1 | -0.7 <sup>b</sup> , -3.9 <sup>d</sup>                     |
| 102   |           | 81.5 | +2.2 <sup>b</sup> , -1.1 <sup>c</sup> , -2.8 <sup>d</sup> | 103   |           | 78.5 | -0.3 <sup>b</sup> , +0.9 <sup>c</sup> , +2.4 <sup>d</sup> |
| 104   |           | 79.8 | +2.8 <sup>b</sup> , +0.6 <sup>c</sup> , -0.2 <sup>d</sup> | 105   |           | 79.5 | +3.0 <sup>b</sup>                                         |
| 110   |           | 82.2 | -0.2 <sup>b</sup>                                         | 111   |           | 82.5 | +0.5 <sup>b</sup>                                         |

<sup>a</sup> When multiple experiment values are present, discrepancies from each BDE are listed besides the reference label. <sup>b</sup> values obtained based on a relationship between the rate of thermolysis of O-Benzyl oxime ethers and NO-H BDE. <sup>8</sup> <sup>c</sup> Ingold *et al.* corrected the calorimetric values <sup>10</sup> downward by 1.7 kcal/mol considering the revised heat of formation of the reference compound and H-bonding energy between oximes and the solvent. <sup>10</sup> <sup>d</sup> values obtained from ref. <sup>15</sup>

**Table S6. Gas phase and solution BDEs of entries 3, 20 and 21 calculated using different solvation model for single point energy (units: kcal/mol).**

| Entry | Structure | Gas phase | Defult PCM | IEFPCM radii=pauling | SMD  | Experiment         |
|-------|-----------|-----------|------------|----------------------|------|--------------------|
| 3     |           | 83.0      | 83.9       | 84.6                 | 85.2 | 88.1 <sup>13</sup> |
| 20    |           | 77.2      | 79.1       | 80.3                 | 79.1 | 79.2 <sup>13</sup> |

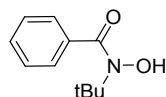

73.4

75.1

75.4

74.8

77.2<sup>16</sup>

**Table S7.** BDEs mono-substituted *E*- and *Z*-aldoximes in kcal/mol, and resonance (R), and inductive (F) parameters of the substituents.

| Entry | Substituent                     | R     | F    | BDE- <i>E</i> | Entry | BDE- <i>Z</i> |
|-------|---------------------------------|-------|------|---------------|-------|---------------|
| 95    | H                               | 0     | 0.03 | 84.0          |       |               |
| 123   | Cl                              | -0.19 | 0.42 | 87.2          |       |               |
| 124   | F                               | -0.39 | 0.45 | 88.7          | 145   | 85.4          |
| 125   | Br                              | -0.22 | 0.45 | 86.8          |       |               |
| 112   | OH                              | -0.7  | 0.33 | 90.2          | 146   | 94.3          |
| 113   | NH <sub>2</sub>                 | -0.74 | 0.08 | 89.1          | 147   | 90.9          |
| 126   | OMe                             | -0.56 | 0.29 | 89.2          |       |               |
| 127   | CCl <sub>3</sub>                | 0.09  | 0.38 | 85.0          | 148   | 77.3          |
| 96    | Me                              | -0.18 | 0.01 | 85.5          | 97    |               |
| 128   | NH-NO <sub>2</sub>              | -0.42 | 0.99 | 89.0          |       |               |
| 114   | NH-Me                           | -0.73 | 0.03 | 88.1          |       |               |
| 129   | N(Me) <sub>2</sub>              | -0.98 | 0.15 | 86.5          |       |               |
| 130   | CH=O                            | 0.09  | 0.33 | 83.2          |       |               |
| 131   | CH=CH <sub>2</sub>              | -0.17 | 0.13 | 84.6          | 149   | 83.4          |
| 132   | CH <sub>2</sub> OH              | -0.03 | 0.03 |               | 150   | 83.9          |
| 133   | CN                              | 0.15  | 0.51 | 84.9          | 151   | 84.7          |
| 134   | COCl                            | 0.15  | 0.46 | 82.7          | 152   | 79.6          |
| 135   | COOH                            | 0.11  | 0.34 | 82.7          |       |               |
| 136   | N=N-CN                          | 0.47  | 0.56 | 83.1          |       |               |
| 137   | NO <sub>2</sub>                 | 0.13  | 0.65 | 84.6          |       |               |
| 106   | Ph                              | -0.13 | 0.12 | 84.5          |       |               |
| 138   | SH                              | -0.15 | 0.30 |               | 153   | 87.6          |
| 139   | SO <sub>2</sub> F               | 0.19  | 0.72 | 85.3          |       |               |
| 140   | SO <sub>2</sub> Cl              | -0.05 | 1.16 | 85.3          |       |               |
| 141   | SO <sub>2</sub> CF <sub>3</sub> | 0.22  | 0.74 | 84.6          |       |               |
| 142   | SO <sub>2</sub> CN              | 0.29  | 0.97 | 84.6          |       |               |
| 143   | SOOH                            | -0.08 | 0.01 | 84.9          | 154   | 80.2          |
| 144   | POF <sub>2</sub>                | 0.15  | 0.74 | 84.3          |       |               |

**Table S8.** BDEs of selected mono-substituted *E*-aldoximes in kcal/mol calculated by B2PLYP/6-311+G (d,p) method and CCSD/6-311+G (d,p) method. (units: kcal/mol)

| Entry | Substituent | B3LYP | B2PLYP | CCSD |
|-------|-------------|-------|--------|------|
| 95    | H           | 84    | 82.3   | 82.0 |
| 124   | F           | 88.7  | 87.3   | 86.1 |
| 112   | OH          | 90.2  | 88.9   | 87.3 |

|     |                 |      |      |      |
|-----|-----------------|------|------|------|
| 113 | NH <sub>2</sub> | 89.1 | 87.7 | 86.2 |
| 94  | CF <sub>3</sub> | 85.0 | 83.2 | 82.8 |
| 96  | Me              | 85.5 | 83.9 | 83.2 |

**Table S9.** BDEs of mono-substituted hydroxylamines XCH<sub>3</sub>NOH in kcal/mol, and resonance (R), and inductive (F) parameters of the substituents.

| Entry | substituent                     | R     | F    | $\sigma_p$ | BDE  |
|-------|---------------------------------|-------|------|------------|------|
| 219   | H                               | 0     | 0.03 | 0          | 75.2 |
| 220   | F                               | -0.39 | 0.45 | 0.06       | 73.4 |
| 221   | OH                              | -0.7  | 0.33 | -0.37      | 73.3 |
| 222   | OMe                             | -0.56 | 0.29 | -0.27      | 73.6 |
| 223   | CF <sub>3</sub>                 | 0.16  | 0.38 | 0.54       | 80.6 |
| 66    | Me                              | -0.18 | 0.01 | -0.17      | 73.9 |
| 224   | NH-NO <sub>2</sub>              | -0.42 | 0.99 | 0.57       | 79.7 |
| 24    | CH=O                            | 0.09  | 0.33 | 0.42       | 77.7 |
| 225   | COCH <sub>3</sub>               | 0.17  | 0.33 | 0.50       | 75.4 |
| 226   | CH=CH <sub>2</sub>              | -0.17 | 0.13 | -0.04      | 70.0 |
| 227   | CN                              | 0.15  | 0.51 | 0.66       | 78.8 |
| 26    | COCl                            | 0.15  | 0.46 | 0.61       | 79.0 |
| 29    | COOH                            | 0.11  | 0.34 | 0.45       | 78.1 |
| 228   | CONH <sub>2</sub>               | 0.10  | 0.26 | 0.36       | 71.2 |
| 229   | NCO                             | -0.12 | 0.31 | 0.19       | 73.4 |
| 230   | NO                              | 0.42  | 0.49 | 0.91       | 83.4 |
| 231   | NO <sub>2</sub>                 | 0.13  | 0.65 | 0.78       | 78.2 |
| 232   | Ph                              | -0.13 | 0.12 | -0.01      | 69.5 |
| 233   | SO <sub>2</sub> F               | 0.19  | 0.72 | 0.91       | 81.7 |
| 234   | PO(OH) <sub>2</sub>             | 0.08  | 0.34 | 0.42       | 76.1 |
| 235   | OCCL <sub>3</sub>               | -0.11 | 0.46 | 0.35       | 77.6 |
| 236   | CHCl <sub>2</sub>               | 0.01  | 0.31 | 0.32       | 76.6 |
| 237   | CHF <sub>2</sub>                | 0.03  | 0.29 | 0.32       | 76.5 |
| 238   | CF <sub>2</sub> CH <sub>3</sub> |       |      |            | 74.8 |
| 239   | SCHF <sub>2</sub>               | 0.05  | 0.32 | 0.37       | 75.6 |
| 33    | CONH <sub>2</sub>               | 0.1   | 0.26 | 0.36       | 71.2 |
| 240   | N=C=S                           | -0.13 | 0.51 | 0.38       | 73.6 |

**Table S10.** Predicted and calculated  $\Delta$ BDEs of symmetrically di-substituted oximes WWC=NOH in kcal/mol. ( $\Delta$ BDE (W) = BDE (*E*-WCH=NOH)-BDE (H<sub>2</sub>C=NOH)). The  $\Delta$ BDEs in Tables S2, S4, and S5 are defined in text.

| Entry | R <sub>a</sub>  | $\Delta$ BDE (W) | 2 $\times$ $\Delta$ BDE(W) | BDE  | $\Delta$ BDE |
|-------|-----------------|------------------|----------------------------|------|--------------|
| 155   | NH <sub>2</sub> | 4.6              | 9.2                        | 84.2 | 0.2          |
| 156   | OMe             | 4.9              | 9.8                        | 89.6 | 5.6          |

|     |      |      |      |       |      |
|-----|------|------|------|-------|------|
| 157 | OH   | 6.2  | 12.4 | 87.8  | 3.8  |
| 158 | F    | 4.7  | 9.4  | 100.3 | 16.3 |
| 159 | Cl   | 3.2  | 6.4  | 98.8  | 14.8 |
| 100 | Et   | -0.2 | -0.4 | 84.5  | 0.5  |
| 160 | C=C  | -0.5 | -1   | 76.1  | -7.9 |
| 161 | CHO  | -3.4 | -6.8 | 77.2  | -6.8 |
| 162 | COCl | -1.4 | -2.8 | 78.8  | -5.2 |
| 163 | COOH | 1    | 2    | 79.6  | -4.4 |
| 164 | SOOH | 0.9  | 1.8  | 81.2  | -2.8 |

**Table S11.** Predicted and calculated  $\Delta$ BDEs of unsymmetrically di-substituted oximes WZC=NOH in kcal/mol. ( $\Delta$ BDE (W) =BDE (*E*- WCH=NOH)-BDE (H<sub>2</sub>C=NOH))

| Entry | W               | $\Delta$ BDE(W) | Z               | $\Delta$ BDE(Z) | $\frac{\Delta$ BDE(W)+<br>$\Delta$ BDE(Z)} | BDE  | $\Delta$ BDE |
|-------|-----------------|-----------------|-----------------|-----------------|--------------------------------------------|------|--------------|
| 165   | NH <sub>2</sub> | 4.6             | C=C             | -0.2            | 4.4                                        | 87.3 | 3.3          |
| 166   | NH <sub>2</sub> | 4.6             | COCl            | -3.4            | 1.2                                        | 88.6 | 4.6          |
| 167   | OH              | 6.2             | NH <sub>2</sub> | 4.6             | 10.8                                       | 82.2 | -1.8         |
| 168   | OH              | 6.2             | OME             | 4.9             | 11.1                                       | 85.7 | 1.7          |
| 169   | OH              | 6.2             | CHO             | -0.5            | 5.7                                        | 85.5 | 1.5          |
| 170   | OH              | 6.2             | N=NCN           | -0.9            | 5.3                                        | 89.3 | 5.3          |
| 171   | Cl              | 3.2             | NH <sub>2</sub> | 4.6             | 7.8                                        | 85.8 | 1.8          |
| 172   | Cl              | 3.2             | OH              | 6.2             | 9.4                                        | 89.8 | 5.8          |
| 173   | Cl              | 3.2             | C=C             | -0.2            | 3                                          | 84.0 | 0.0          |
| 174   | Cl              | 3.2             | NO <sub>2</sub> | 0.6             | 3.8                                        | 82.4 | -1.6         |
| 175   | Cl              | 3.2             | CHO             | -0.5            | 2.7                                        | 83.4 | -0.6         |
| 176   | Cl              | 3.2             | N=NCN           | -0.9            | 2.3                                        | 84.5 | 0.5          |
| 177   | Me              | 1.5             | OH              | 6.2             | 7.7                                        | 92.6 | 8.6          |
| 178   | Me              | 1.5             | C=C             | -0.2            | 1.3                                        | 83.8 | -0.2         |
| 179   | Me              | 1.5             | CHO             | -0.5            | 1                                          | 83.5 | -0.5         |
| 180   | Me              | 1.5             | N=NCN           | -0.9            | 0.6                                        | 82.3 | -1.7         |
| 181   | C=C             | -0.2            | NH <sub>2</sub> | 4.6             | 4.4                                        | 86.8 | 2.8          |
| 182   | C=C             | -0.2            | Me              | 1.5             | 1.3                                        | 83.8 | -0.2         |
| 183   | C=C             | -0.2            | NO <sub>2</sub> | 0.6             | 0.4                                        | 82.2 | -1.8         |
| 184   | C=C             | -0.2            | COCl            | -3.4            | -3.6                                       | 79.5 | -4.5         |
| 185   | C=C             | -0.2            | CHO             | -0.5            | -0.7                                       | 78.8 | -5.2         |
| 186   | C=C             | -0.2            | N=NCN           | -0.9            | -1.1                                       | 74.6 | -9.4         |
| 187   | NO <sub>2</sub> | 0.6             | NH <sub>2</sub> | 4.6             | 5.2                                        | 85.6 | 1.6          |
| 188   | NO <sub>2</sub> | 0.6             | OH              | 6.2             | 6.8                                        | 83.7 | -0.3         |
| 189   | NO <sub>2</sub> | 0.6             | F               | 4.7             | 5.3                                        | 86.5 | 2.5          |
| 190   | NO <sub>2</sub> | 0.6             | Me              | 1.5             | 2.1                                        | 83.1 | -0.9         |
| 191   | NO <sub>2</sub> | 0.6             | C=C             | -0.2            | 0.4                                        | 82.2 | -1.8         |
| 192   | NO <sub>2</sub> | 0.6             | COCl            | -3.4            | -2.8                                       | 82.7 | -1.3         |
| 193   | NO <sub>2</sub> | 0.6             | CHO             | -0.5            | 0.1                                        | 83.2 | -0.8         |
| 194   | NO <sub>2</sub> | 0.6             | N=NCN           | -0.9            | -0.3                                       | 81.1 | -2.9         |
| 195   | COCl            | -3.4            | NH <sub>2</sub> | 4.6             | 1.2                                        | 82.9 | -1.1         |

|     |       |      |                 |      |      |      |      |
|-----|-------|------|-----------------|------|------|------|------|
| 196 | COCl  | -3.4 | OH              | 6.2  | 2.8  | 85.4 | 1.4  |
| 197 | COCl  | -3.4 | F               | 4.7  | 1.3  | 83.6 | -0.4 |
| 198 | COCl  | -3.4 | Me              | 1.5  | -1.9 | 80.0 | -4.0 |
| 199 | COCl  | -3.4 | C=C             | -0.2 | -3.6 | 79.2 | -4.8 |
| 200 | COCl  | -3.4 | NO <sub>2</sub> | 0.6  | -2.8 | 82.0 | -2.0 |
| 201 | COCl  | -3.4 | CHO             | -0.5 | -3.9 | 80.2 | -3.8 |
| 202 | COCl  | -3.4 | N=NCN           | -0.9 | -4.3 | 78.6 | -5.4 |
| 203 | CHO   | -0.5 | NH <sub>2</sub> | 4.6  | 4.1  | 82.8 | -1.2 |
| 204 | CHO   | -0.5 | OH              | 6.2  | 5.7  | 85.1 | 1.1  |
| 205 | CHO   | -0.5 | F               | 4.7  | 4.2  | 83.5 | -0.5 |
| 206 | CHO   | -0.5 | Cl              | 3.2  | 2.7  | 81.8 | -2.2 |
| 207 | CHO   | -0.5 | Me              | 1.5  | 1    | 80.1 | -3.9 |
| 208 | CHO   | -0.5 | NO <sub>2</sub> | 0.6  | 0.1  | 80.8 | -3.2 |
| 209 | CHO   | -0.5 | COCl            | -3.4 | -3.9 | 78.0 | -6.0 |
| 210 | CHO   | -0.5 | N=NCN           | -0.9 | -1.4 | 78.4 | -5.6 |
| 211 | N=NCN | -0.9 | NH <sub>2</sub> | 4.6  | 3.7  | 82.9 | -1.1 |
| 212 | N=NCN | -0.9 | OH              | 6.2  | 5.3  | 85.5 | 1.5  |
| 213 | N=NCN | -0.9 | F               | 4.7  | 3.8  | 85.0 | 1.0  |
| 214 | N=NCN | -0.9 | Me              | 1.5  | 0.6  | 83.1 | -0.9 |
| 215 | N=NCN | -0.9 | C=C             | -0.2 | -1.1 | 80.9 | -3.1 |
| 216 | N=NCN | -0.9 | NO <sub>2</sub> | 0.6  | -0.3 | 84.3 | 0.3  |
| 217 | N=NCN | -0.9 | COCl            | -3.4 | -4.3 | 82.4 | -1.6 |
| 218 | N=NCN | -0.9 | CHO             | -0.5 | -1.4 | 82.3 | -1.7 |

**Table S12.** Predicted and calculated  $\Delta$ BDEs of di-substituted hydroxylamines XYNOH in kcal/mol. ( $\Delta$ BDE(X)=BDE(XCH<sub>3</sub>NOH)-BDE(CH<sub>3</sub>)<sub>2</sub>NOH))

| Entry | X                               | $\Delta$ BDE(X) | Y                               | $\Delta$ BDE(Y) | $\Delta$ BDE(X) + $\Delta$ BDE(Y) | BDE  | $\Delta$ BDE |
|-------|---------------------------------|-----------------|---------------------------------|-----------------|-----------------------------------|------|--------------|
| 30    | CHO                             | 3.8             | OH                              | -0.6            | 3.2                               | 71.8 | -2.1         |
| 31    | CHO                             | 3.8             | F                               | -0.5            | 3.3                               | 73.0 | -0.9         |
| 32    | CHO                             | 3.8             | OCH <sub>3</sub>                | -0.3            | 3.5                               | 71.9 | -2.0         |
| 25    | COCl                            | 5.1             | NH-NO <sub>2</sub>              | 5.8             | 10.9                              | 84.7 | 10.8         |
| 241   | CN                              | 4.9             | OH                              | -0.6            | 4.3                               | 77.8 | 3.9          |
| 242   | CN                              | 4.9             | F                               | -0.5            | 4.4                               | 79.0 | 5.1          |
| 243   | CN                              | 4.9             | OCH <sub>3</sub>                | -0.3            | 4.6                               | 77.5 | 3.6          |
| 27    | COCl                            | 5.1             | F                               | -0.5            | 4.6                               | 75.2 | 1.3          |
| 28    | COCl                            | 5.1             | OCH <sub>3</sub>                | -0.3            | 4.8                               | 75.1 | 1.2          |
| 244   | Ph                              | -4.4            | OH                              | -0.6            | -5.0                              | 68.8 | -5.1         |
| 245   | Ph                              | -4.4            | F                               | -0.5            | -4.9                              | 70.3 | -3.6         |
| 246   | COCH <sub>3</sub>               | 1.5             | CF <sub>3</sub>                 | 6.7             | 8.2                               | 80.3 | 6.4          |
| 247   | COCH <sub>3</sub>               | 1.5             | CF <sub>2</sub> CH <sub>3</sub> | 0.9             | 2.4                               | 82.1 | 8.2          |
| 2     | CF <sub>3</sub>                 | 6.7             | CF <sub>3</sub>                 | 6.7             | 13.4                              | 85.2 | 11.3         |
| 58    | CF <sub>2</sub> CH <sub>3</sub> | 0.9             | CF <sub>2</sub> CH <sub>3</sub> | 0.9             | 1.8                               | 80.3 | 6.4          |

Total energy and Sum of electronic and thermal enthalpies of precursor and corresponding radicals in Hartree.

| Entry | Precursor total energy | Radical total energy r | Sum of electronic and thermal enthalpies of precursor | Sum of electronic and thermal enthalpies of radical |
|-------|------------------------|------------------------|-------------------------------------------------------|-----------------------------------------------------|
| 1     | -484.4692999           | -483.8558292           | -284.388538                                           | -283.7658                                           |
| 2     | -806.0462542           | -805.4074068           | -805.987062                                           | -805.360817                                         |
| 3     | -588.4153467           | -587.7798177           | -588.286179                                           | -587.663416                                         |
| 4     | -131.7667883           | -131.1386729           | -131.10813                                            | -131.722352                                         |
| 5     | -284.4724789           | -283.8452794           | -284.388109                                           | -283.773598                                         |
| 6     | -434.7168312           | -434.0804844           | -434.637607                                           | -434.014051                                         |
| 7     | -558.5051886           | -557.8897609           | -558.238035                                           | -557.635203                                         |
| 8     | -446.3409067           | -445.7289228           | -446.063466                                           | -445.463561                                         |
| 9     | -537.4096376           | -536.7986558           | -537.15352                                            | -536.554811                                         |
| 10    | -404.611185            | -403.9868838           | -404.404878                                           | -403.792566                                         |
| 11    | -523.0488393           | -443.3130254           | -443.693193                                           | -443.088429                                         |
| 12    | -976.5553625           | -975.9419812           | -976.238704                                           | -975.637624                                         |
| 13    |                        |                        |                                                       |                                                     |
| 14    | -1094.299864           | -1093.687156           | -1093.909332                                          | -1093.308893                                        |
| 15    | -1295.730816           | -1295.119785           | -1295.102923                                          | -1294.504174                                        |
| 16    | 710.7946251            | -710.1791187           | -710.674766                                           | -710.069209                                         |
| 17    | -712.1930277           | -711.5733662           | -711.876532                                           | -711.269208                                         |
| 18    | -795.4942009           | -795.0608273           | -795.211548                                           | -794.604759                                         |
| 19    | -1042.65802            | -1042.368699           | -1042.39122                                           | -1041.782526                                        |
| 20    | -515.5725256           | -514.9464717           | -515.402637                                           | -514.789116                                         |
| 21    | -633.5398946           | -632.9195953           | -633.282505                                           | -632.67459                                          |
| 22    | -653.2168339           | -652.6005225           | -652.899976                                           | -652.295801                                         |
| 23    | -907.6019754           | -906.9769459           | -907.16178                                            | -906.549346                                         |
| 24    | -284.4606838           | -283.8336851           | -284.376205                                           | -283.761829                                         |
| 25    | -964.6450338           | -964.0070642           | -964.572459                                           | -963.95064                                          |
| 26    | -744.0876082           | -743.3448105           | -744.011197                                           | -743.394889                                         |
| 27    | -803.9563052           | -803.3325624           | -803.917789                                           | -803.307504                                         |
| 28    | -819.2658595           | -818.6433927           | -819.185016                                           | -818.574903                                         |
| 29    | -359.7273864           | -359.0991462           | -359.636787                                           | -359.021835                                         |
| 30    | -320.3272228           | -319.7100889           | -320.26769                                            | -319.662754                                         |
| 31    | -344.3303709           | -343.7108908           | -344.283717                                           | -343.676872                                         |
| 32    | -359.6370236           | -359.0196956           | -359.548192                                           | -358.943113                                         |
| 33    | -339.8524674           | -339.2362646           | -339.749601                                           | -339.145708                                         |



| Entry | Precursor total energy | Radical total energy r | Sum of electronic and thermal enthalpies of precursor | Sum of electronic and thermal enthalpies of radical |
|-------|------------------------|------------------------|-------------------------------------------------------|-----------------------------------------------------|
| 34    | -441.7627291           | -441.1433451           | -441.56152                                            | -440.954541                                         |
| 35    | -477.6996825           | -477.0741458           | -477.52146                                            | -476.908306                                         |
| 36    | -517.008683            | -516.3843727           | -516.801121                                           | -516.189149                                         |
| 37    | -418.4514901           | -417.8177269           | -418.291265                                           | -417.67001                                          |
| 38    | -476.4790316           | -475.851894            | -476.323154                                           | -475.708459                                         |
| 39    | -438.0093707           | -439.932946            | -440.382903                                           | -439.765749                                         |
| 40    | -416.016022            | -415.3960864           | -415.90124                                            | -415.295024                                         |
| 41    | -417.2293878           | -416.6136247           | -417.091013                                           | -416.487343                                         |
| 42    | -514.3680389           | -513.7413393           | -514.220815                                           | -513.606634                                         |
| 43    | -514.3683824           | -513.7417136           | -514.220815                                           | -513.606634                                         |
| 44    | -439.3288503           | -438.7042275           | -439.173296                                           | -438.56101                                          |
| 45    | -593.0230786           | -592.3979521           | -592.817628                                           | -592.204877                                         |
| 46    | -479.8886505           | -479.2521713           | -479.678765                                           | -479.054955                                         |
| 47    | -456.5558732           | -455.9331474           | -456.387279                                           | -455.776935                                         |
| 48    | -587.6446074           | -587.0133945           | -587.509389                                           | -586.888619                                         |
| 49    | -820.708652            | -820.0862943           | -820.473169                                           | -819.862193                                         |
| 50    | -437.1714933           | -436.526934            | -437.046952                                           | -436.416328                                         |
| 51    | -475.285817            | -474.6389882           | -475.152466                                           | -474.518681                                         |
| 52    | -435.9582339           | -435.3173275           | -435.857493                                           | -435.227009                                         |
| 53    | -604.7941837           | -604.1454567           | -604.663547                                           | -604.027854                                         |
| 54    | -506.3001179           | -505.6876628           | -506.059175                                           | -505.459084                                         |
| 55    | -566.2568235           | -565.6404932           | -566.055038                                           | -565.4481                                           |
| 56    | -626.2065735           | -625.5792339           | -626.038171                                           | -625.423237                                         |
| 57    | -686.1629442           | -685.5320512           | -686.031203                                           | -685.412676                                         |
| 58    | -684.9518623           | -684.3188389           | -684.840945                                           | -684.220912                                         |
| 59    | -396.1580717           | -395.5239228           | -396.031599                                           | -395.412294                                         |

| Entry | Precursor total energy | Radical total energy r | Sum of electronic and thermal enthalpies of precursor | Sum of electronic and thermal enthalpies of radical |
|-------|------------------------|------------------------|-------------------------------------------------------|-----------------------------------------------------|
| 60    | -471.1544319           | -470.5266018           | -471.037419                                           | -470.422516                                         |
| 61    | -490.8737019           | -490.2497677           | -490.69936                                            | -490.087726                                         |
| 62    | -1023.533796           | -1023.032888           | -1023.664416                                          | -1022.915069                                        |
| 63    | -872.4286531           | -871.7931335           | -872.302738                                           | -871.679959                                         |
| 64    | -1379.518768           | -1378.883842           | -1379.438753                                          | -1378.816492                                        |
| 65    | -584.5254186           | -583.8825923           | -584.397004                                           | -583.767255                                         |
| 66    | -806.0462542           | -805.4074068           | -210.306024                                           | -209.697796                                         |
| 67    | -641.7129649           | -641.1043591           | -641.311261                                           | -640.714285                                         |
| 68    | -484.4539642           | -483.8427743           | -484.170136                                           | -483.571081                                         |
| 69    | -677.448577            | -676.8383061           | -677.085258                                           | -676.486849                                         |
| 70    | -754.8485189           | -754.2368061           | -754.449858                                           | -753.850001                                         |
| 71    | -563.1204663           | -562.50234             | -562.774605                                           | -562.16853                                          |
| 72    | -641.7413581           | -641.1349789           | -641.336387                                           | -640.742009                                         |
| 73    | -715.7819992           | -715.1734257           | -715.395284                                           | -714.798947                                         |
| 74    | -602.4287553           | -601.823047            | -602.053781                                           | -601.460242                                         |
| 75    | -1132.085528           | -1131.473835           | -1131.688731                                          | -1131.088984                                        |
| 76    | -1247.641067           | -1247.027621           | -1247.196257                                          | -1246.595107                                        |
| 77    | -445.1457055           | -444.5372479           | -444.890177                                           | -444.293806                                         |
| 78    | -523.7759441           | -523.1667354           | -523.460356                                           | -522.863186                                         |
| 79    | -483.263712            | -482.6427472           | -482.999656                                           | -482.390915                                         |
| 80    | -597.6075433           | -596.9984523           | -597.326568                                           | -596.729531                                         |
| 81    | -522.5717484           | -521.9568045           | -522.277332                                           | -521.674616                                         |
| 82    | -560.7115013           | -560.0936581           | -560.410289                                           | -559.804586                                         |
| 83    | -596.3931034           | -595.7772708           | -596.134526                                           | -595.531035                                         |
| 84    | -287.8443072           | -287.2278098           | -287.704702                                           | -287.10054                                          |
| 85    | -285.4125              | -284.7868085           | -285.320932                                           | -284.707787                                         |

| Entry | Precursor total energy | Radical total energy r | Sum of electronic and thermal enthalpies of precursor | Sum of electronic and thermal enthalpies of radical |
|-------|------------------------|------------------------|-------------------------------------------------------|-----------------------------------------------------|
| 86    | -443.9144326           | -443.3055217           | -443.683323                                           | -443.086454                                         |
| 87    | -481.0569481           | -480.447344            | -480.825791                                           | -480.228441                                         |
| 88    | -440.3067701           | -439.6966703           | -440.142134                                           | -439.543964                                         |
| 89    | -592.7834702           | -592.1685109           | -592.59277                                            | -591.990117                                         |
| 90    | -822.851128            | -822.2445608           | -822.583957                                           | -821.989835                                         |
| 91    | -710.7467433           | -710.1344695           | -710.467723                                           | -709.867811                                         |
| 92    | -706.1557367           | -705.5393967           | -705.953028                                           | -705.348917                                         |
| 93    | -483.245691            | -482.633183            | -482.983984                                           | -482.383727                                         |
| 94    | -507.0173983           | -506.3785853           | -506.960169                                           | -506.334193                                         |
| 95    | -169.871703            | -169.2343976           | -169.822849                                           | -169.198444                                         |
| 96    | -209.2051286           | -208.5657243           | -209.126879                                           | -208.500179                                         |
| 97    | -209.2043778           | -208.5667047           | -209.126794                                           | -209.126794                                         |
| 98    | -507.01307140          | -506.37711646          | -506.955703                                           | -506.332449                                         |
| 99    | -248.5363989           | -247.8976295           | -248.429728                                           | -247.802571                                         |
| 100   | -327.183023            | -326.5452757           | -327.015626                                           | -326.390484                                         |
| 101   | -405.8269881           | -405.1929026           | -405.600836                                           | -404.979474                                         |
| 102   | -445.1484151           | -444.5152835           | -444.893287                                           | -444.272871                                         |
| 103   | -484.4550902           | -483.8267718           | -484.170903                                           | -483.555264                                         |
| 104   | -716.7814095           | -716.1500448           | -716.384217                                           | -715.765508                                         |
| 105   | -716.7770217           | -716.1471807           | -716.379698                                           | -715.762513                                         |
| 106   | -400.9902313           | -400.3522135           | -400.855764                                           | -400.230627                                         |
| 107   | -400.9872771           | -400.3541254           | -400.852298                                           | -400.232033                                         |
| 108   | -440.3178498           | -439.6815444           | -440.153964                                           | -439.530328                                         |
| 109   | -440.3071436           | -439.6744802           | -440.144828                                           | -439.524375                                         |
| 110   | -632.0959389           | -631.4619432           | -631.876109                                           | -631.254668                                         |
| 111   | -630.9005913           | -630.2658095           | -630.70337                                            | -630.081354                                         |
| 112   | -245.1266051           | -244.4793676           | -245.071549                                           | -244.437357                                         |
| 113   | -225.2557387           | -224.6104133           | -225.188164                                           | -224.555748                                         |
| 114   | -264.5724019           | -263.9285425           | -264.475286                                           | -263.844384                                         |
| 115   | -247.2621185           | -246.6225377           | -247.178243                                           | -246.551079                                         |
| 116   | -286.6119916           | -285.972495            | -286.497618                                           | -285.870592                                         |
| 117   | -325.9700466           | -325.3305876           | -325.824785                                           | -325.197853                                         |
| 118   | -365.2996604           | -364.661531            | -403.213013                                           | -402.586517                                         |
| 119   | -403.3950859           | -402.7560459           | -403.213013                                           | -402.586517                                         |
| 120   | -327.1779639           | -326.5393038           | -327.01179                                            | -326.38592                                          |
| 121   | -327.1736503           | -326.5397801           | -327.006991                                           | -326.385929                                         |

| Entry | Precursor total energy | Radical total energy r | Sum of electronic and thermal enthalpies of precursor | Sum of electronic and thermal enthalpies of radical |
|-------|------------------------|------------------------|-------------------------------------------------------|-----------------------------------------------------|
| 122   | -949.0981189           | -948.4702562           | -948.587898                                           | -947.972521                                         |
| 123   | -629.4926864           | -628.8504123           | -629.451909                                           | -628.822411                                         |
| 124   | -269.1384363           | -268.493786            | -269.096364                                           | -268.464596                                         |
| 125   | -2743.412956           | -2742.771416           | -2743.372679                                          | -2742.743878                                        |
| 126   | -284.4368761           | -283.79123             | -284.352345                                           | -283.719702                                         |
| 127   | -1588.044689           | -1587.405944           | -1587.991389                                          | -1587.365455                                        |
| 128   | -429.7920443           | -429.1468373           | -429.719788                                           | -429.087506                                         |
| 129   | -303.8886014           | -303.2473182           | -303.762415                                           | -303.134008                                         |
| 130   | -283.2287146           | -282.5926656           | -283.168304                                           | -282.545152                                         |
| 131   | -247.2990203           | -246.6609505           | -247.214667                                           | -246.589427                                         |
| 132   |                        |                        |                                                       |                                                     |
| 133   | -262.132366            | -261.4938393           | -262.082885                                           | -261.457168                                         |
| 134   | -742.8632181           | -742.2281811           | -742.810616                                           | -742.188397                                         |
| 135   | -358.5038189           | -357.8686939           | -358.436903                                           | -357.814619                                         |
| 136   | -371.6006414           | -370.9648917           | -371.540085                                           | -370.91723                                          |
| 137   | -374.4250921           | -373.7869734           | -374.371005                                           | -373.745775                                         |
| 138   |                        |                        |                                                       |                                                     |
| 139   | -817.7761195           | -817.1369095           | -817.72067                                            | -817.094249                                         |
| 140   | -1178.125773           | -1177.486517           | -1178.07128                                           | -1177.44484                                         |
| 141   | -1055.627173           | -1054.98905            | -1055.556948                                          | -1054.931622                                        |
| 142   | -810.7298756           | -810.0912422           | -1055.556948                                          | -1054.931622                                        |
| 143   | -793.7528021           | -793.1141941           | -793.685261                                           | -793.059449                                         |
| 144   | -785.7272322           | -785.0896399           | -785.672568                                           | -785.04775                                          |
| 145   | -269.1357157           | -268.496746            | -269.093683                                           | -268.467151                                         |
| 146   | -245.1325254           | -244.4780869           | -245.077089                                           | -244.436339                                         |
| 147   | -225.2617667           | -224.6128407           | -225.193852                                           | -224.558557                                         |
| 148   | -1588.039391           | -1587.404692           | -1587.985934                                          | -1587.363993                                        |
| 149   | -247.2974475           | -246.6612068           | -247.212799                                           | -246.589372                                         |
| 150   | -284.4410891           | -283.8022244           | -284.35451                                            | -283.730276                                         |
| 151   | -262.1319028           | -261.4936857           | -262.082181                                           | -261.456682                                         |
| 152   | -742.8589411           | -742.2291066           | -742.806397                                           | -742.189021                                         |
| 153   | -568.0954649           | -567.4525524           | -568.045167                                           | -567.415026                                         |
| 154   | -718.5198202           | -717.8888636           | -718.458435                                           | -717.840176                                         |
| 155   | -280.645077            | -280.0071088           | -280.558672                                           | -279.934006                                         |
| 156   | -398.9976734           | -398.351177            | -398.877814                                           | -398.244563                                         |
| 157   | -320.3846233           | -319.7413387           | -320.323945                                           | -319.693617                                         |
| 158   | -368.4057104           | -367.7423742           | -368.370352                                           | -367.720011                                         |
| 159   | -1089.110624           | -1088.449162           | -1089.077856                                          | -1088.429859                                        |
| 160   | -324.7062008           | -324.0822669           | -324.586943                                           | -323.975185                                         |
| 161   | -396.5685529           | -395.9423133           | -396.496968                                           | -395.883379                                         |
| 162   | -1315.835578           | -1315.20712            | -1315.780069                                          | -1315.163957                                        |

| Entry | Precursor total energy | Radical total energy r | Sum of electronic and thermal enthalpies of precursor | Sum of electronic and thermal enthalpies of radical |
|-------|------------------------|------------------------|-------------------------------------------------------|-----------------------------------------------------|
| 163   | -547.1240994           | -546.4938664           | -547.039536                                           | -546.422255                                         |
| 164   | -1267.17589            | -1266.543616           | -1267.10164                                           | -1266.481805                                        |
| 165   | -302.685255            | -302.0418203           | -302.582212                                           | -301.952677                                         |
| 166   | -798.2489285           | -797.6044297           | -798.17803                                            | -797.546374                                         |
| 167   | -300.5181508           | -299.883437            | -300.444555                                           | -299.823078                                         |
| 168   | -359.6919776           | -359.0528984           | -359.602663                                           | -358.975682                                         |
| 169   | -358.4838675           | -357.8445562           | -358.417546                                           | -357.790865                                         |
| 170   | -446.8489021           | -446.2018693           | -446.782676                                           | -446.1499                                           |
| 171   | -684.8727579           | -684.2324332           | -684.813814                                           | -684.186528                                         |
| 172   | -704.7407685           | -704.0942105           | -704.69451                                            | -704.060875                                         |
| 173   | -706.9176626           | -706.2810683           | -706.841749                                           | -706.217452                                         |
| 174   | -834.0326171           | -833.3985501           | -833.987197                                           | -833.365391                                         |
| 175   | -742.8460497           | -742.2102359           | -742.794048                                           | -742.170629                                         |
| 176   | -831.2187361           | -830.5808258           | -831.16632                                            | -830.541171                                         |
| 177   | -284.4530639           | -283.8012439           | -284.369986                                           | -283.731928                                         |
| 178   | -286.6286563           | -285.9919448           | -286.514812                                           | -285.89079                                          |
| 179   | -322.5635621           | -321.9272394           | -322.473653                                           | -321.850104                                         |
| 180   | -410.9272538           | -410.2926547           | -410.837589                                           | -410.215911                                         |
| 181   | -302.6775895           | -302.0349831           | -302.574532                                           | -301.945654                                         |
| 182   | -286.6286561           | -285.9919449           | -286.514812                                           | -285.890788                                         |
| 183   | -451.8434375           | -451.209615            | -451.754486                                           | -451.133018                                         |
| 184   | -820.2725371           | -819.6429536           | -820.185034                                           | -819.567803                                         |
| 185   | -360.6436416           | -360.0148541           | -360.547893                                           | -359.931816                                         |
| 186   | -449.0117134           | -448.3895678           | -448.916242                                           | -448.306802                                         |
| 187   | -429.8049997           | -429.1655579           | -429.733072                                           | -429.10624                                          |
| 188   | -449.6699496           | -449.0332564           | -449.61056                                            | -448.986652                                         |
| 189   | -473.6789999           | -473.038203            | -473.632432                                           | -473.004132                                         |
| 190   | -413.7582624           | -413.1229712           | -413.675288                                           | -413.05233                                          |
| 191   | -451.8434375           | -451.209615            | -451.754486                                           | -451.133018                                         |
| 192   | -947.3970288           | -946.7623586           | -947.340197                                           | -946.717859                                         |
| 193   | -487.7685576           | -487.1330607           | -487.703747                                           | -487.080678                                         |
| 194   | -576.1314772           | -575.4987644           | -576.066417                                           | -575.446734                                         |
| 195   | -798.2359364           | -797.6007947           | -798.165377                                           | -797.542769                                         |
| 196   | -818.1059141           | -817.4666308           | -818.047961                                           | -817.42138                                          |
| 197   | -842.1173592           | -841.481117            | -842.072221                                           | -841.448438                                         |
| 198   | -782.1890254           | -781.5586772           | -782.107381                                           | -781.489337                                         |
| 199   | -820.2754127           | -819.6463097           | -820.187949                                           | -819.57123                                          |
| 200   | -947.396304            | -946.7626343           | -947.339203                                           | -946.718017                                         |
| 201   | -856.2049393           | -855.5741105           | -856.141463                                           | -855.523097                                         |
| 202   | -944.5706589           | -943.9423061           | -944.507377                                           | -943.891588                                         |
| 203   | -338.5997296           | -337.9646055           | -338.521185                                           | -337.898824                                         |

| Entry | Precursor total energy | Radical total energy r | Sum of electronic and thermal enthalpies of precursor | Sum of electronic and thermal enthalpies of radical |
|-------|------------------------|------------------------|-------------------------------------------------------|-----------------------------------------------------|
| 204   | -358.4730075           | -357.8339994           | -358.407108                                           | -357.781014                                         |
| 205   | -382.484784            | -381.8486374           | -382.43175                                            | -381.808258                                         |
| 206   | -742.8390703           | -742.205681            | -742.787198                                           | -742.166373                                         |
| 207   | -322.5525924           | -321.9218654           | -322.46314                                            | -321.844963                                         |
| 208   | -487.7703157           | -487.1394194           | -487.706221                                           | -487.08696                                          |
| 209   | -856.2056173           | -855.5784082           | -856.142163                                           | -855.52741                                          |
| 210   | -484.9431538           | -484.3152133           | -484.871727                                           | -484.256378                                         |
| 211   | -426.9786286           | -426.3430174           | -426.89993                                            | -426.277381                                         |
| 212   | -446.8435681           | -446.2039488           | -446.777604                                           | -446.150937                                         |
| 213   | -470.8566362           | -470.21791             | -470.803318                                           | -470.1774                                           |
| 214   | -831.2104374           | -830.5748635           | -831.1584                                             | -830.535508                                         |
| 215   | -449.0147512           | -448.382788            | -448.919053                                           | -448.299708                                         |
| 216   | -576.133653            | -575.4950554           | -576.068538                                           | -575.443645                                         |
| 217   | -944.5710621           | -943.9365393           | -944.50747                                            | -943.885686                                         |
| 218   | -484.9410012           | -484.3063718           | -484.869512                                           | -484.247797                                         |
| 219   | -171.0871611           | -170.4636917           | -171.013668                                           | -170.403362                                         |
| 220   | -270.3076734           | -269.6878354           | -270.242719                                           | -269.635255                                         |
| 221   | -246.293281            | -245.6737434           | -246.215497                                           | -245.608262                                         |
| 222   | -285.6059843           | -284.9860586           | -285.499073                                           | -284.891225                                         |
| 223   | -508.2354603           | -507.604173            | -508.154633                                           | -507.535773                                         |
| 224   | -430.9801798           | -430.3520724           | -430.884938                                           | -430.269163                                         |
| 225   | -323.7926414           | -323.1693873           | -323.678918                                           | -323.068257                                         |
| 226   | -248.5014727           | -247.8870981           | -248.393749                                           | -247.791766                                         |
| 227   | -263.3346912           | -262.706166            | -263.261799                                           | -262.645696                                         |
| 228   | -339.8524674           | -339.2362646           | -339.749601                                           | -339.145708                                         |
| 229   | -338.5771017           | -337.9574685           | -338.498956                                           | -337.891563                                         |
| 230   | -300.4330226           | -299.7964103           | -300.361479                                           | -299.738027                                         |
| 231   | -375.6341609           | -375.0061577           | -375.556739                                           | -374.941597                                         |
| 232   | -402.1906195           | -401.5772712           | -402.032964                                           | -401.431794                                         |
| 233   | -818.9959634           | -818.3624635           | -818.916856                                           | -818.296092                                         |
| 234   | -738.89917             | -738.2749278           | -738.796781                                           | -738.184989                                         |
| 235   | -744.0876082           | -743.4586263           | -1664.379312                                          | -1663.765154                                        |
| 236   | -1129.650609           | -1129.025751           | -1129.564719                                          | -1128.952118                                        |
| 237   | -408.9564333           | -408.3316544           | -408.867845                                           | -408.255435                                         |
| 238   | -448.2886718           | -447.6667316           | -448.171727                                           | -447.562069                                         |
| 239   | -807.1458165           | -806.5225928           | -807.055289                                           | -806.444258                                         |
| 240   | -661.5367753           | -660.9166437           | -661.460743                                           | -660.852921                                         |
| 241   | -299.2030715           | -298.5760146           | -299.154931                                           | -298.540421                                         |
| 242   | -323.2082273           | -322.5793531           | -323.172951                                           | -322.556605                                         |
| 243   | -338.5172353           | -337.8909709           | -338.439911                                           | -337.825863                                         |
| 244   | -438.0726715           | -437.4602161           | -437.939557                                           | -437.339477                                         |

| Entry | Precursor total energy | Radical total energy r | Sum of electronic and thermal enthalpies of precursor | Sum of electronic and thermal enthalpies of radical |
|-------|------------------------|------------------------|-------------------------------------------------------|-----------------------------------------------------|
| 245   | -462.0850055           | -461.4700664           | -461.96471                                            | -461.362138                                         |
| 246   | -621.6040673           | -620.9729126           | -621.51228                                            | -620.893751                                         |
| 247   | -561.6674709           | -561.0335403           | -561.539283                                           | -560.917955                                         |

Cartesian coordinates for compounds

**Entry 1**

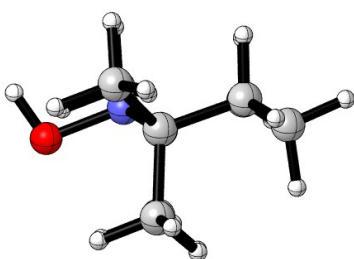

|   |            |            |              |
|---|------------|------------|--------------|
| C | 1.2950380  | -0.1514722 | -0.0782644   |
| C | -1.2950370 | -0.1515072 | -0.0782104   |
| C | -1.2503890 | 1.3368848  | -0.4859134   |
| C | -0.0000270 | 2.0650838  | 0.0067696    |
| C | 1.2503330  | 1.3369178  | -0.4859654   |
| C | 1.6301610  | -0.3128842 | 1.4209056    |
| C | 2.4000950  | -0.8467882 | -0.8935984   |
| C | -1.6300940 | -0.3129272 | 1.4209736    |
| C | -2.4001090 | -0.8468512 | -0.893499441 |
| N | -0.0000000 | -0.7609202 | -0.5031064   |
| O | 0.0000270  | -2.1440992 | -0.0776734   |
| H | -1.2866870 | 1.3979818  | -1.5799474   |
| H | -2.1583480 | 1.8235398  | -0.1141304   |
| H | -0.0000490 | 3.0961708  | -0.3628764   |
| H | -0.0000060 | 2.1384158  | 1.0992976    |
| H | 1.2865840  | 1.3980158  | -1.5800014   |
| H | 2.1582950  | 1.8235968  | -0.1142204   |
| H | 1.4700540  | -1.3442582 | 1.7377006    |
| H | 2.6829390  | -0.0687712 | 1.5910096    |
| H | 1.0398700  | 0.3370718  | 2.0662016    |
| H | 3.3558400  | -0.3344822 | -0.7505874   |
| H | 2.5304860  | -1.8849952 | -0.5820824   |
| H | 2.1594600  | -0.8302262 | -1.9597354   |
| H | -1.4699460 | -1.3442972 | 1.7377616    |
| H | -1.0397930 | 0.3370438  | 2.0662446    |

|   |            |            |            |
|---|------------|------------|------------|
| H | -2.6828710 | -0.0688422 | 1.5911206  |
| H | -2.5304600 | -1.8850622 | -0.5819774 |
| H | -3.3558620 | -0.3345712 | -0.7504484 |
| H | -2.1595190 | -0.8302832 | -1.9596454 |
| H | 0.0000160  | -2.6374852 | -0.9061014 |

### 1-radical

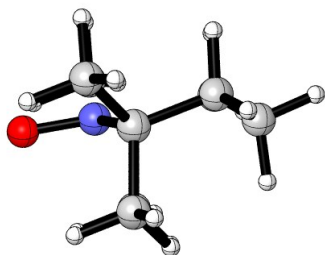

|   |            |            |            |
|---|------------|------------|------------|
| C | 1.3326434  | -0.2399568 | -0.0553921 |
| C | -1.3326466 | -0.2399308 | -0.0554071 |
| C | -1.2454186 | 1.1968712  | -0.6049171 |
| C | 0.0000194  | 1.9557032  | -0.1516051 |
| C | 1.2454484  | 1.1968462  | -0.6049031 |
| O | -0.0000216 | -2.1909898 | 0.0196119  |
| N | -0.0000076 | -0.9283188 | -0.1903501 |
| C | 1.7614884  | -0.2530068 | 1.4257749  |
| C | 2.3477064  | -1.0423258 | -0.8819961 |
| C | -1.7615096 | -0.2529728 | 1.4257549  |
| C | -2.3477166 | -1.0422808 | -0.8820221 |
| H | -1.2494096 | 1.1555632  | -1.7006791 |
| H | -2.1573366 | 1.7281612  | -0.3134391 |
| H | 0.0000314  | 2.9606462  | -0.5861501 |
| H | 0.0000154  | 2.0970422  | 0.9343579  |
| H | 1.2494514  | 1.1555392  | -1.7006651 |
| H | 2.1573734  | 1.7281192  | -0.3134151 |
| H | 1.7113194  | -1.2694418 | 1.8199679  |
| H | 2.7925144  | 0.0998052  | 1.5191009  |
| H | 1.1341284  | 0.3865362  | 2.0493139  |
| H | 3.3203774  | -0.5433018 | -0.8514451 |
| H | 2.4609004  | -2.0534978 | -0.4934331 |
| H | 2.0316294  | -1.1125858 | -1.9257081 |
| H | -2.7925296 | 0.0998592  | 1.5190699  |
| H | -1.7113646 | -1.2694088 | 1.8199489  |
| H | -1.1341436 | 0.3865582  | 2.0493009  |
| H | -2.4609346 | -2.0534498 | -0.4934611 |
| H | -3.3203776 | -0.5432368 | -0.8514821 |
| H | -2.0316296 | -1.1125468 | -1.9257301 |



### Entry 2

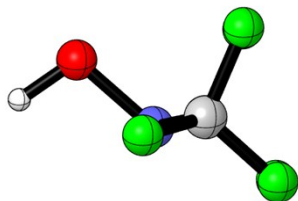

|   |            |            |            |
|---|------------|------------|------------|
| N | 0.0000000  | 0.2670634  | -0.3622782 |
| C | 1.2461640  | -0.3541526 | 0.0345088  |
| C | -1.2461640 | -0.3541536 | 0.0345088  |
| F | -1.4371900 | -0.3933506 | 1.3632708  |
| F | -1.2976700 | -1.6035176 | -0.4296282 |
| F | -2.2488610 | 0.3498414  | -0.5005212 |
| F | 1.2976850  | -1.6035066 | -0.4296552 |
| F | 2.2488610  | 0.3498614  | -0.5004962 |
| F | 1.4371770  | -0.3933776 | 1.3632728  |
| O | -0.0000030 | 1.5974444  | 0.1147068  |
| H | 0.0000010  | 2.1378484  | -0.6876892 |

### 2-radical

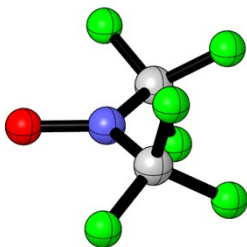

|   |            |            |            |
|---|------------|------------|------------|
| N | 0.0000408  | 0.5826883  | 0.0000433  |
| C | -1.2807342 | -0.1369937 | 0.0673953  |
| C | 1.2807888  | -0.1372067 | -0.0676787 |
| O | -0.0000722 | 1.8512563  | 0.0014233  |
| F | -1.1946442 | -1.2806287 | -0.6176367 |
| F | -1.6014862 | -0.4229787 | 1.3343563  |
| F | 1.5984788  | -0.4280157 | -1.3343217 |
| F | 2.2293958  | 0.6260353  | 0.4468323  |
| F | -2.2283132 | 0.6241783  | -0.4522537 |
| F | 1.1965458  | -1.2783347 | 0.6218403  |

### Entry 3

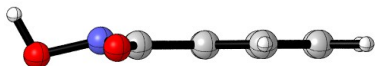

|   |           |            |            |
|---|-----------|------------|------------|
| C | 1.1870760 | -1.4206944 | -0.0297020 |
| C | 0.0049170 | -0.6983944 | -0.0263250 |
| C | 0.0050050 | 0.6984216  | -0.0261400 |
| C | 1.1872570 | 1.4205706  | -0.0294880 |

|   |            |            |            |
|---|------------|------------|------------|
| C | 2.3857430  | 0.6989406  | -0.0391690 |
| C | 2.3856540  | -0.6992164 | -0.0392620 |
| C | -1.4060670 | 1.1835316  | -0.0176910 |
| C | -1.4062200 | -1.1833214 | -0.0185890 |
| O | -1.8429100 | 2.3032046  | -0.0680920 |
| O | -1.8431620 | -2.3029744 | -0.0685910 |
| N | -2.1737260 | 0.0001146  | 0.0841030  |
| O | -3.5170750 | 0.0002916  | -0.2071860 |
| H | 1.1773710  | -2.5048714 | -0.0298000 |
| H | 1.1776920  | 2.5047486  | -0.0292640 |
| H | 3.3309860  | 1.2312366  | -0.0483340 |
| H | 3.3308280  | -1.2316314 | -0.0485500 |
| H | -3.9833690 | 0.0000436  | 0.6420800  |

### 3-radical

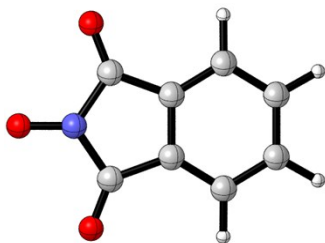

|   |            |            |            |
|---|------------|------------|------------|
| C | 0.9350869  | -1.4206116 | -0.0000382 |
| C | -0.2510701 | -0.7001586 | -0.0000543 |
| C | -0.2510691 | 0.7001594  | -0.0001353 |
| C | 0.9350899  | 1.4206094  | 0.0000038  |
| C | 2.1316669  | 0.7000554  | 0.0000727  |
| C | 2.1316659  | -0.7000596 | 0.0000308  |
| C | -1.6439461 | 1.2042064  | -0.0005182 |
| C | -1.6439491 | -1.2042036 | 0.0001478  |
| O | -2.0790481 | 2.3191484  | 0.0000907  |
| O | -2.0790531 | -2.3191446 | -0.0000833 |
| N | -2.4663281 | 0.0000024  | 0.0000348  |
| O | -3.7240171 | 0.0000044  | 0.0002648  |
| H | 0.9253269  | -2.5046976 | 0.0000158  |
| H | 0.9253309  | 2.5046954  | -0.0000493 |
| H | 3.0771579  | 1.2318154  | 0.0001228  |
| H | 3.0771559  | -1.2318206 | 0.0000947  |

### Entry 4

|   |            |            |            |
|---|------------|------------|------------|
| N | -0.5015858 | 0.0000484  | 0.1393380  |
| O | 0.9126192  | 0.0001294  | -0.1527430 |
| H | -0.8611128 | 0.8145364  | -0.3552470 |
| H | -0.8604768 | -0.8146276 | -0.3554010 |
| H | 1.3105562  | -0.0000866 | 0.7240530  |

#### 4-radical

|   |             |             |             |
|---|-------------|-------------|-------------|
| N | -0.54089100 | 0.00000000  | -0.01690800 |
| O | 0.73527800  | 0.00000000  | 0.00420700  |
| H | -1.04799400 | -0.87892700 | 0.04234900  |
| H | -1.04799400 | 0.87892800  | 0.04234900  |

#### Entry 5

|   |             |             |             |
|---|-------------|-------------|-------------|
| N | -0.60702700 | -0.72063500 | -0.10826900 |
| C | 0.43252300  | 0.15794300  | -0.00990200 |
| O | -1.89118900 | -0.18432800 | 0.03372700  |
| O | 0.20950100  | 1.36314900  | -0.00114700 |
| C | 1.81155200  | -0.45163500 | 0.02021600  |
| H | -0.55914000 | -1.65370900 | 0.27449600  |
| H | -1.69914700 | 0.77466200  | 0.07982800  |
| H | 1.79702800  | -1.54174000 | -0.03831500 |
| H | 2.31320300  | -0.14395200 | 0.94011500  |
| H | 2.38629800  | -0.05923000 | -0.82076400 |

#### 5-radical

|   |             |             |             |
|---|-------------|-------------|-------------|
| N | 0.81331100  | -0.58381700 | 0.00005300  |
| C | -0.53683000 | -0.15337300 | 0.00002500  |
| O | 1.81938000  | 0.19161500  | -0.00005900 |
| O | -1.39969900 | -1.00350200 | -0.00005300 |
| C | -0.74065800 | 1.33334100  | 0.00002600  |
| H | 0.95965900  | -1.59810400 | 0.00019400  |
| H | -0.26876100 | 1.78112500  | -0.87765900 |
| H | -0.26752300 | 1.78126400  | 0.87697200  |
| H | -1.80907200 | 1.53772000  | 0.00071700  |

#### Entry 6

|   |             |             |             |
|---|-------------|-------------|-------------|
| C | -1.16505400 | 0.17429500  | 0.02299400  |
| C | 1.16503700  | 0.17419200  | 0.02238300  |
| N | -0.00000300 | -0.60691900 | 0.16549600  |
| O | -0.00012000 | -1.94675100 | -0.15656400 |
| O | -2.29274900 | -0.23587900 | -0.04424400 |
| O | 2.29277000  | -0.23599800 | -0.04411000 |
| C | -0.66726500 | 1.58926900  | -0.00968600 |
| C | 0.66737900  | 1.58922400  | -0.00943000 |
| H | 0.00005500  | -2.41969200 | 0.68674000  |
| H | -1.34876500 | 2.42768500  | -0.02194800 |
| H | 1.34894800  | 2.42758700  | -0.02149400 |

#### 6-radical

|   |            |            |             |
|---|------------|------------|-------------|
| C | 1.18664400 | 0.13699300 | -0.00010400 |
|---|------------|------------|-------------|

|   |             |             |             |
|---|-------------|-------------|-------------|
| C | -1.18664400 | 0.13699300  | -0.00003100 |
| N | 0.00000000  | -0.69556800 | -0.00005700 |
| O | 0.00000000  | -1.95607000 | -0.00010300 |
| O | 2.31095500  | -0.26925400 | -0.00009600 |
| O | -2.31095500 | -0.26925400 | 0.00002700  |
| C | 0.66908400  | 1.53459200  | 0.00014800  |
| C | -0.66908400 | 1.53459200  | 0.00018200  |
| H | 1.33858200  | 2.38329600  | 0.00027100  |
| H | -1.33858200 | 2.38329600  | 0.00034100  |

**Entry 7**

|   |            |            |            |
|---|------------|------------|------------|
| C | 1.2964110  | -0.0965941 | -0.0670472 |
| C | -1.2964110 | -0.0965941 | -0.0670472 |
| C | -1.2643800 | 1.3353839  | -0.6570892 |
| C | 0.0000000  | 2.0834829  | -0.2958762 |
| C | 1.2643800  | 1.3353839  | -0.6570892 |
| N | 0.0000000  | -0.7469291 | -0.4251952 |
| C | 1.6156520  | -0.0478401 | 1.4436468  |
| C | 2.4073760  | -0.8900151 | -0.7777692 |
| C | -1.6156520 | -0.0478411 | 1.4436468  |
| C | -2.4073760 | -0.8900151 | -0.7777692 |
| O | 0.0000000  | 3.1783459  | 0.2251138  |
| H | -1.3025400 | 1.2643199  | -1.7506052 |
| H | -2.1332590 | 1.9009719  | -0.3173012 |
| H | 1.3025400  | 1.2643199  | -1.7506052 |
| H | 2.1332590  | 1.9009719  | -0.3173012 |
| H | 1.4420380  | -1.0238241 | 1.8986418  |
| H | 2.6692800  | 0.2093219  | 1.5828788  |
| H | 1.0286890  | 0.6987509  | 1.9781778  |
| H | 3.3590170  | -0.3586511 | -0.6934372 |
| H | 2.5319890  | -1.8761291 | -0.3270492 |
| H | 2.1711840  | -1.0134691 | -1.8377392 |
| H | -2.6692800 | 0.2093219  | 1.5828788  |
| H | -1.4420380 | -1.0238241 | 1.8986418  |
| H | -1.0286890 | 0.6987509  | 1.9781778  |
| H | -2.5319890 | -1.8761291 | -0.3270492 |
| H | -3.3590170 | -0.3586511 | -0.6934372 |
| H | -2.1711840 | -1.0134701 | -1.8377392 |
| O | 0.0000000  | -2.0692641 | 0.1567928  |
| H | 0.0000000  | -2.6500851 | -0.6114492 |

**7-radical**

|   |            |            |            |
|---|------------|------------|------------|
| C | -1.1554255 | 1.2295994  | 0.5548707  |
| C | -1.3243335 | -0.1882736 | -0.0232813 |
| C | 1.3229355  | -0.1973586 | 0.0237487  |
| C | 1.1642375  | 1.2195224  | -0.5597593 |

|   |            |            |            |
|---|------------|------------|------------|
| C | 0.0069455  | 2.0284014  | -0.0044293 |
| N | -0.0031305 | -0.8961316 | 0.0012197  |
| O | -0.0075695 | -2.1737516 | 0.0035307  |
| C | -2.3146625 | -0.9744886 | 0.8477757  |
| C | -1.8354175 | -0.1450036 | -1.4780823 |
| C | 2.3082155  | -0.9936776 | -0.8438473 |
| C | 1.8335805  | -0.1522316 | 1.4786427  |
| O | 0.0117045  | 3.2393954  | -0.0054553 |
| H | -0.9927165 | 1.1634374  | 1.6378257  |
| H | -2.0714245 | 1.8079704  | 0.4159037  |
| H | 1.0018875  | 1.1504764  | -1.6425813 |
| H | 2.0841155  | 1.7920524  | -0.4222163 |
| H | -1.9405885 | -1.0743666 | 1.8692597  |
| H | -3.2707215 | -0.4452486 | 0.8771747  |
| H | -2.4748565 | -1.9740336 | 0.4464547  |
| H | -1.1941575 | 0.4599944  | -2.1233103 |
| H | -1.8721715 | -1.1577536 | -1.8837303 |
| H | -2.8426325 | 0.2792304  | -1.5114603 |
| H | 2.4612265  | -1.9928256 | -0.4387533 |
| H | 1.9339935  | -1.0947286 | -1.8651623 |
| H | 3.2679545  | -0.4712246 | -0.8746683 |
| H | 2.8436835  | 0.2651594  | 1.5109797  |
| H | 1.1961875  | 0.4595614  | 2.1212937  |
| H | 1.8631395  | -1.1637016 | 1.8880577  |

### Entry 8

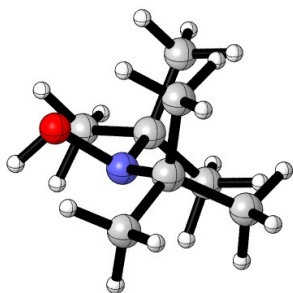

|   |            |            |            |
|---|------------|------------|------------|
| N | 0.0111575  | -0.5772953 | -0.4585436 |
| O | -0.0623465 | -1.9496333 | 0.0142014  |
| C | -1.3222825 | 0.0606467  | -0.1618206 |
| C | -2.3966075 | -0.8953893 | -0.7248606 |
| C | -1.6142725 | 0.2986987  | 1.3318514  |
| C | -1.4604735 | 1.3765147  | -0.9530406 |
| C | 1.3346205  | -0.0708333 | 0.0580684  |
| C | 1.5279115  | 1.4233257  | -0.2357536 |
| C | 1.5735675  | -0.3276923 | 1.5623774  |
| C | 2.4032425  | -0.8416483 | -0.7462886 |
| H | -0.0974865 | -2.4681283 | -0.7978196 |
| H | -2.1863605 | -1.1414113 | -1.7700496 |

|   |            |            |            |
|---|------------|------------|------------|
| H | -2.4599675 | -1.8203893 | -0.1535406 |
| H | -3.3743895 | -0.4089983 | -0.6874836 |
| H | -0.9997235 | 1.0978587  | 1.7511294  |
| H | -2.6598175 | 0.5923287  | 1.4672694  |
| H | -1.4454015 | -0.6104003 | 1.9122864  |
| H | -2.5084285 | 1.6877967  | -0.9431276 |
| H | -0.8833795 | 2.1999547  | -0.5392316 |
| H | -1.1629185 | 1.2347617  | -1.9946716 |
| H | 1.3190785  | 1.6649717  | -1.2795356 |
| H | 0.9185725  | 2.0629127  | 0.4035824  |
| H | 2.5714105  | 1.6814577  | -0.0376196 |
| H | 1.3743295  | -1.3685933 | 1.8159594  |
| H | 2.6185385  | -0.1151933 | 1.8071054  |
| H | 0.9564205  | 0.3068827  | 2.1988224  |
| H | 3.4045385  | -0.4894443 | -0.4837996 |
| H | 2.3631835  | -1.9111633 | -0.5362986 |
| H | 2.2572835  | -0.6918973 | -1.8191686 |

### 8-radical

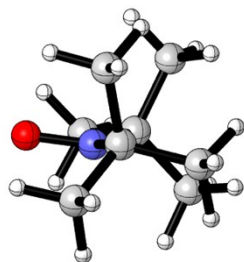

|   |            |            |            |
|---|------------|------------|------------|
| N | -0.0034616 | -0.7714753 | 0.0115207  |
| O | 0.0353914  | -1.9716753 | 0.4615617  |
| C | -1.3655966 | -0.0981883 | 0.0146417  |
| C | -2.4176706 | -1.2086203 | 0.1649557  |
| C | -1.4919826 | 0.8657817  | 1.2098427  |
| C | -1.6336696 | 0.6293497  | -1.3165533 |
| C | 1.3620214  | -0.1095743 | -0.0382493 |
| C | 1.3810194  | 1.2567127  | -0.7344663 |
| C | 1.8824624  | 0.0299177  | 1.4058117  |
| C | 2.2761204  | -1.0637753 | -0.8282643 |
| H | -2.3495946 | -1.9337393 | -0.6473903 |
| H | -2.3052876 | -1.7502213 | 1.1022077  |
| H | -3.4108326 | -0.7524203 | 0.1398377  |
| H | -0.8020106 | 1.7085887  | 1.1493097  |
| H | -2.5050776 | 1.2770587  | 1.2446977  |
| H | -1.3115526 | 0.3401987  | 2.1502337  |
| H | -2.6914126 | 0.9010237  | -1.3672423 |
| H | -1.0622716 | 1.5473757  | -1.4346683 |
| H | -1.4191436 | -0.0244543 | -2.1654533 |
| H | 1.0850574  | 1.1892937  | -1.7822813 |

|   |           |            |            |
|---|-----------|------------|------------|
| H | 0.7618534 | 2.0055687  | -0.2402493 |
| H | 2.4080444 | 1.6301617  | -0.7115353 |
| H | 1.8354324 | -0.9323453 | 1.9170957  |
| H | 2.9230644 | 0.3666707  | 1.3992107  |
| H | 1.3008774 | 0.7558057  | 1.9786177  |
| H | 3.2860854 | -0.6483513 | -0.8804173 |
| H | 2.3229144 | -2.0418613 | -0.3532093 |
| H | 1.9092204 | -1.1968063 | -1.8495643 |

### Entry 9

|   |             |             |             |
|---|-------------|-------------|-------------|
| C | 0.61338700  | 0.81559900  | -0.09364700 |
| C | -1.35054500 | -0.67986600 | -0.02442700 |
| C | -0.05347600 | -1.53507200 | 0.01151900  |
| C | 1.06100500  | -0.60772800 | -0.53368900 |
| C | -2.30987500 | -1.14752600 | -1.12941500 |
| C | -2.07958400 | -0.70625200 | 1.32879100  |
| C | 0.92109900  | 1.10456500  | 1.38702000  |
| C | 1.22058300  | 1.90972600  | -0.97503500 |
| C | 2.40165700  | -0.98228600 | -0.10324700 |
| N | 3.46221800  | -1.28767700 | 0.23357600  |
| N | -0.83020700 | 0.67254400  | -0.41685100 |
| O | -1.59479800 | 1.72806700  | 0.17109600  |
| H | 0.17984200  | -1.83631500 | 1.03385300  |
| H | -0.14019000 | -2.44383300 | -0.58546700 |
| H | 1.05054600  | -0.63339800 | -1.62778300 |
| H | -2.70954400 | -2.14113600 | -0.90506600 |
| H | -3.15367600 | -0.45749500 | -1.21757800 |
| H | -1.80073100 | -1.18514800 | -2.09548300 |
| H | -2.99136300 | -0.10899900 | 1.29285400  |
| H | -2.35384500 | -1.73774300 | 1.56850700  |
| H | -1.45942500 | -0.32172000 | 2.13897500  |
| H | 0.37003900  | 1.98978200  | 1.70706000  |
| H | 0.65046200  | 0.27749300  | 2.04458800  |
| H | 1.98863100  | 1.29464700  | 1.51834000  |
| H | 0.82691500  | 2.88766100  | -0.68692700 |
| H | 2.30743800  | 1.94062700  | -0.86194300 |
| H | 0.97904500  | 1.73567400  | -2.02634600 |
| H | -1.95534800 | 2.19434500  | -0.59063600 |

### 9-radical

|   |             |             |             |
|---|-------------|-------------|-------------|
| C | 0.64480100  | 0.83806800  | -0.03267400 |
| C | -1.40073500 | -0.64788100 | 0.00555000  |
| C | -0.12044800 | -1.49952100 | 0.10829600  |
| C | 0.99575500  | -0.60842100 | -0.49327300 |
| C | -2.16133200 | -0.87624800 | -1.31198500 |
| C | -2.33778900 | -0.83145800 | 1.20346500  |

|   |             |             |             |
|---|-------------|-------------|-------------|
| C | 1.16997300  | 1.18064500  | 1.37129200  |
| C | 1.07342200  | 1.90048600  | -1.04549500 |
| N | -0.84187700 | 0.73729600  | 0.00589600  |
| O | -1.57753300 | 1.76405600  | 0.13264800  |
| C | 2.34060500  | -1.04660200 | -0.14210700 |
| N | 3.40322700  | -1.40285000 | 0.13116900  |
| H | 0.10805600  | -1.72359000 | 1.15227400  |
| H | -0.20717000 | -2.44720600 | -0.42462800 |
| H | 0.92486500  | -0.63836300 | -1.58541700 |
| H | -2.62289400 | -1.86729500 | -1.31621300 |
| H | -2.94707300 | -0.12585600 | -1.41920500 |
| H | -1.49954900 | -0.80159200 | -2.17897900 |
| H | -3.17194400 | -0.13122300 | 1.13676600  |
| H | -2.73480900 | -1.84998200 | 1.21694600  |
| H | -1.81327600 | -0.65124400 | 2.14472700  |
| H | 2.25483800  | 1.30414900  | 1.35748100  |
| H | 0.71297600  | 2.11564100  | 1.70031000  |
| H | 0.92318300  | 0.40466400  | 2.09933700  |
| H | 0.69100700  | 2.87627300  | -0.74294300 |
| H | 2.16381700  | 1.95146500  | -1.09827600 |
| H | 0.68328600  | 1.67617600  | -2.04123500 |

### Entry 10

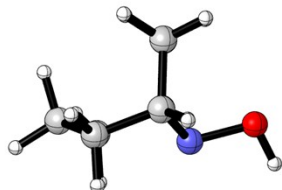

|   |            |            |            |
|---|------------|------------|------------|
| C | -1.0250559 | 1.2697278  | -0.5823044 |
| C | 0.4657801  | 1.1509448  | -0.2182334 |
| C | 0.4656381  | -1.1510242 | -0.2181184 |
| C | -1.0252129 | -1.2696592 | -0.5821784 |
| C | -1.7990479 | 0.0001018  | -0.1859924 |
| C | 0.7000201  | 0.7774118  | 1.2703906  |
| C | 0.6999251  | -0.7773722 | 1.2704676  |
| N | 0.9915131  | -0.0001102 | -0.9924224 |
| H | -1.4518519 | 2.1485138  | -0.0883884 |
| H | -1.0996639 | 1.4348548  | -1.6617724 |
| H | 1.0044971  | 2.0494308  | -0.5208964 |
| H | 1.0042441  | -2.0496062 | -0.5206934 |
| H | -1.4521169 | -2.1483432 | -0.0881754 |
| H | -1.0998409 | -1.4348832 | -1.6616304 |
| H | -1.9678109 | 0.0001658  | 0.8961756  |
| H | -2.7909469 | 0.0001398  | -0.6471154 |
| H | -0.0718659 | 1.1995488  | 1.9186666  |
| H | 1.6624281  | 1.1634188  | 1.6076546  |



|   |            |            |            |
|---|------------|------------|------------|
| H | 1.6622851  | -1.1634642 | 1.6077696  |
| H | -0.0720129 | -1.1993502 | 1.9187866  |
| O | 2.4392641  | -0.0001902 | -0.8072764 |
| H | 2.7598321  | -0.0002562 | -1.7147144 |

### 10-radical

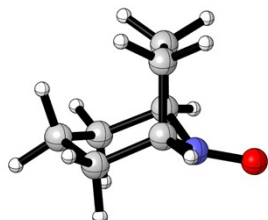

|   |            |            |            |
|---|------------|------------|------------|
| C | -0.8208173 | 1.2783869  | -0.7225463 |
| C | 0.6265007  | 1.1764499  | -0.2111083 |
| C | 0.6264497  | -1.1764461 | -0.2112803 |
| C | -0.8208733 | -1.2782461 | -0.7227343 |
| C | -1.6202623 | 0.0000649  | -0.4031013 |
| C | 0.7173027  | 0.7812169  | 1.2853797  |
| C | 0.7172687  | -0.7814361 | 1.2852647  |
| N | 1.2444307  | 0.0000379  | -0.8750063 |
| O | 2.4864207  | 0.0000329  | -1.1779773 |
| H | -1.3078593 | 2.1514839  | -0.2764603 |
| H | -0.7892983 | 1.4443089  | -1.8042733 |
| H | 1.2114497  | 2.0578659  | -0.4690793 |
| H | 1.2113607  | -2.0578491 | -0.4693813 |
| H | -1.3079523 | -2.1513871 | -0.2767763 |
| H | -0.7893603 | -1.4440101 | -1.8044853 |
| H | -1.8932023 | -0.0000071 | 0.6576077  |
| H | -2.5635983 | 0.0001259  | -0.9561033 |
| H | -0.1098743 | 1.1985819  | 1.8638257  |
| H | 1.6459457  | 1.1629079  | 1.7123787  |
| H | 1.6458957  | -1.1632311 | 1.7122077  |
| H | -0.1099263 | -1.1988511 | 1.8636487  |

### Entry 11

|   |             |             |             |
|---|-------------|-------------|-------------|
| C | -1.08971200 | 0.00003100  | -1.64660300 |
| C | -1.11171800 | -1.26441900 | -0.77458800 |
| C | 1.42230800  | 1.26885900  | -0.23473300 |
| C | -0.03230600 | -1.21814400 | 0.32615400  |
| C | 2.22366400  | 0.00001000  | 0.09573100  |
| C | 1.42232400  | -1.26884100 | -0.23477800 |
| C | -1.11173300 | 1.26444200  | -0.77453100 |
| C | -0.03232100 | 1.21812800  | 0.32620800  |

|   |             |             |             |
|---|-------------|-------------|-------------|
| N | -0.13757400 | -0.00002500 | 1.16270600  |
| O | -1.45166200 | -0.00003900 | 1.77781800  |
| H | -1.94381300 | 0.00004300  | -2.33077200 |
| H | -0.19601800 | 0.00005000  | -2.28098700 |
| H | -0.96417500 | -2.16150800 | -1.38597500 |
| H | -2.08986500 | -1.36078100 | -0.29450500 |
| H | 1.93955500  | 2.14538200  | 0.16422300  |
| H | 1.38572300  | 1.40249100  | -1.32074100 |
| H | -0.18806700 | -2.05829700 | 1.00644600  |
| H | 2.48009200  | -0.00001100 | 1.15765900  |
| H | 3.16641000  | 0.00002100  | -0.46066800 |
| H | 1.93958200  | -2.14536700 | 0.16415600  |
| H | 1.38575100  | -1.40244000 | -1.32079000 |
| H | -2.08988400 | 1.36077300  | -0.29445000 |
| H | -0.96419300 | 2.16156100  | -1.38587500 |
| H | -0.18808200 | 2.05825000  | 1.00653800  |
| H | -1.23973700 | -0.00008500 | 2.71708000  |

### 11-radical

|   |             |             |             |
|---|-------------|-------------|-------------|
| C | -1.40085600 | -0.00000100 | -1.41650800 |
| C | -1.27317700 | -1.27492500 | -0.56382600 |
| C | 1.32384200  | 1.26905900  | -0.45579100 |
| C | -0.01654000 | -1.23904600 | 0.33375900  |
| C | 2.15707200  | 0.00000000  | -0.22003400 |
| C | 1.32384300  | -1.26905900 | -0.45579000 |
| C | -1.27317700 | 1.27492400  | -0.56382600 |
| C | -0.01654000 | 1.23904600  | 0.33375900  |
| N | -0.07975100 | 0.00000000  | 1.13818400  |
| O | -0.76217400 | 0.00000100  | 2.22172900  |
| H | -2.36277100 | -0.00000100 | -1.93745400 |
| H | -0.63532400 | -0.00000100 | -2.19986100 |
| H | -1.24258000 | -2.16463600 | -1.20155200 |
| H | -2.14711600 | -1.37261000 | 0.08833900  |
| H | 1.89973800  | 2.15030800  | -0.16232200 |
| H | 1.11954200  | 1.37725700  | -1.52570300 |
| H | -0.05836400 | -2.05277200 | 1.05767600  |
| H | 2.53154500  | 0.00000100  | 0.80830400  |
| H | 3.03295800  | 0.00000000  | -0.87545000 |
| H | 1.89973900  | -2.15030700 | -0.16232000 |
| H | 1.11954200  | -1.37725800 | -1.52570200 |
| H | -2.14711600 | 1.37260900  | 0.08833800  |
| H | -1.24258100 | 2.16463500  | -1.20155300 |
| H | -0.05836400 | 2.05277300  | 1.05767500  |

### Entry 12

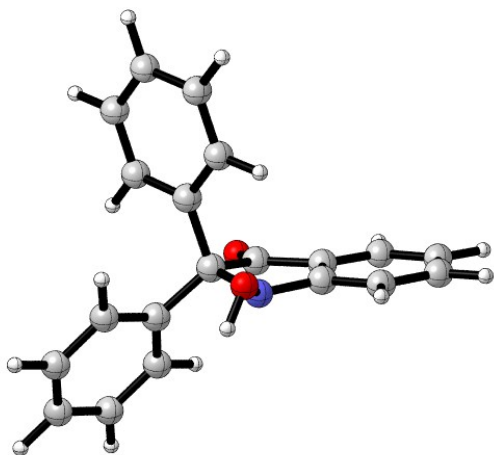

|   |            |            |            |
|---|------------|------------|------------|
| C | 2.0185028  | -0.6847658 | 0.5640479  |
| C | 2.0720048  | -0.6397358 | -0.8397561 |
| C | 3.2849678  | -0.7686298 | -1.5158171 |
| C | 4.4496278  | -0.9109398 | -0.7708931 |
| C | 4.3880088  | -0.9227208 | 0.6327079  |
| C | 3.1842238  | -0.8136138 | 1.3230969  |
| C | 0.7121938  | -0.4577118 | -1.3516611 |
| O | 0.3184208  | -0.4730038 | -2.4955371 |
| C | -0.1992642 | -0.1897638 | -0.0914511 |
| N | 0.7028238  | -0.6561618 | 0.9956239  |
| C | -1.4862872 | -1.0124858 | -0.0363281 |
| C | -2.4884432 | -0.6530068 | 0.8744019  |
| C | -1.6589912 | -2.1697198 | -0.8015621 |
| C | -3.6321742 | -1.4347708 | 1.0206309  |
| C | -2.8074262 | -2.9478938 | -0.6598241 |
| C | -3.7960462 | -2.5859748 | 0.2519869  |
| C | -0.4374922 | 1.3292392  | -0.1069881 |
| C | -1.4308122 | 1.8400112  | -0.9528441 |
| C | 0.3583768  | 2.2244832  | 0.6136769  |
| C | -1.6361102 | 3.2123472  | -1.0580641 |
| C | 0.1482978  | 3.5991442  | 0.5088309  |
| C | -0.8492652 | 4.0986612  | -0.3238441 |
| H | 3.3029178  | -0.7405198 | -2.5991321 |
| H | 5.4081408  | -1.0033968 | -1.2668311 |
| H | 5.3078428  | -1.0215768 | 1.1990879  |
| H | 3.1472948  | -0.8229388 | 2.4042859  |
| H | -2.3787332 | 0.2512132  | 1.4618189  |
| H | -0.9085382 | -2.4617728 | -1.5242031 |
| H | -4.3978152 | -1.1393998 | 1.7295799  |
| H | -2.9280402 | -3.8372018 | -1.2683381 |
| H | -4.6889272 | -3.1916958 | 0.3591109  |
| H | -2.0397322 | 1.1609802  | -1.5365511 |
| H | 1.1374948  | 1.8611612  | 1.2689449  |
| H | -2.4100352 | 3.5883722  | -1.7178441 |

|   |            |            |            |
|---|------------|------------|------------|
| H | 0.7693478  | 4.2781192  | 1.0824939  |
| H | -1.0104642 | 5.1678712  | -0.4035441 |
| O | 0.4737918  | -0.1751698 | 2.2984839  |
| H | 0.0003178  | -0.8970308 | 2.7322019  |

### 12-radical

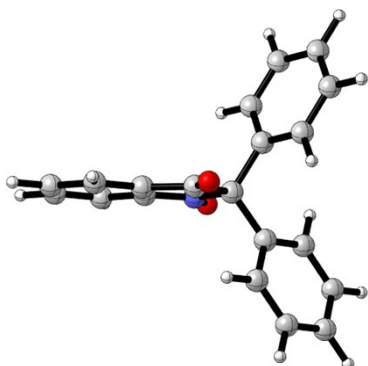

|   |            |            |            |
|---|------------|------------|------------|
| C | -2.1722393 | -0.1005741 | -0.6164751 |
| C | -2.2037593 | 0.0897429  | 0.7721769  |
| C | -3.4194003 | 0.2071599  | 1.4426799  |
| C | -4.5930493 | 0.1292409  | 0.6990599  |
| C | -4.5450303 | -0.0660491 | -0.6938331 |
| C | -3.3409423 | -0.1850971 | -1.3775721 |
| C | -0.8281753 | 0.1100209  | 1.2863869  |
| O | -0.4645573 | 0.2250939  | 2.4334979  |
| C | 0.1310287  | -0.0378801 | 0.0536069  |
| N | -0.8633543 | -0.1813981 | -1.0727391 |
| O | -0.5355163 | -0.3644321 | -2.2811391 |
| C | 1.0030937  | -1.2929731 | 0.1029479  |
| C | 2.0232567  | -1.4456121 | -0.8436661 |
| C | 0.7735477  | -2.3203111 | 1.0229729  |
| C | 2.7949607  | -2.6030321 | -0.8697991 |
| C | 1.5526827  | -3.4768701 | 0.9987989  |
| C | 2.5632247  | -3.6226471 | 0.0527989  |
| C | 0.9310947  | 1.2612329  | -0.0806431 |
| C | 1.9579927  | 1.5054529  | 0.8400089  |
| C | 0.6369017  | 2.2299389  | -1.0434141 |
| C | 2.6785177  | 2.6943639  | 0.7927019  |
| C | 1.3657667  | 3.4188929  | -1.0904511 |
| C | 2.3862237  | 3.6558549  | -0.1744911 |
| H | -3.4346583 | 0.3541739  | 2.5160639  |
| H | -5.5539503 | 0.2174179  | 1.1914759  |
| H | -5.4743723 | -0.1254801 | -1.2492481 |
| H | -3.2933083 | -0.3363341 | -2.4476321 |
| H | 2.2078957  | -0.6581191 | -1.5628981 |

|   |            |            |            |
|---|------------|------------|------------|
| H | 0.0026417  | -2.2234501 | 1.7764229  |
| H | 3.5793867  | -2.7071551 | -1.6109231 |
| H | 1.3677947  | -4.2606671 | 1.7246599  |
| H | 3.1686697  | -4.5219311 | 0.0354539  |
| H | 2.1868787  | 0.7658929  | 1.5969869  |
| H | -0.1430183 | 2.0591399  | -1.7735271 |
| H | 3.4698977  | 2.8692359  | 1.5128419  |
| H | 1.1324807  | 4.1569279  | -1.8496441 |
| H | 2.9513927  | 4.5802309  | -0.2134491 |

#### Entry 14

|   |             |             |             |
|---|-------------|-------------|-------------|
| C | -3.88941800 | 0.75643000  | -2.04109400 |
| C | -2.50477800 | 0.87129800  | -2.12276000 |
| C | -1.68620100 | 0.11758900  | -1.27232800 |
| C | -2.26236700 | -0.78291700 | -0.35094600 |
| C | -3.65755900 | -0.86020800 | -0.27966300 |
| C | -4.47346100 | -0.10123400 | -1.11239400 |
| C | -1.36244100 | -1.59566800 | 0.48217300  |
| C | -0.01054900 | -1.22064800 | 0.61831400  |
| C | 0.82592800  | -1.97433100 | 1.44579800  |
| C | 0.35424300  | -3.09379600 | 2.12338000  |
| C | -0.97264200 | -3.48788500 | 1.96501800  |
| C | -1.81489200 | -2.74739400 | 1.14806100  |
| N | -0.28438700 | 0.16998700  | -1.35899500 |
| O | 0.18053800  | 1.20438000  | -2.18692200 |
| C | 0.52731300  | 0.03422000  | -0.10485200 |
| C | 0.35998000  | 1.31609200  | 0.74844600  |
| C | 1.00338600  | 2.50844700  | 0.37269300  |
| C | -0.50423900 | 1.35926200  | 1.84894800  |
| C | 0.77730200  | 3.69766100  | 1.06429600  |
| C | -0.72467600 | 2.54685800  | 2.54523000  |
| C | -0.09029600 | 3.72265400  | 2.15374400  |
| C | 1.98991600  | -0.21612000 | -0.52805000 |
| C | 2.26693400  | -0.93166000 | -1.69768900 |
| C | 3.06080200  | 0.17270300  | 0.28227800  |
| C | 3.57729700  | -1.23871400 | -2.05182000 |
| C | 4.37509800  | -0.13870900 | -0.06881800 |
| C | 4.63938700  | -0.84390600 | -1.23904300 |
| H | -4.51020800 | 1.34705000  | -2.70546600 |
| H | -2.05568700 | 1.52201900  | -2.85875700 |
| H | -4.11642000 | -1.51756500 | 0.44873900  |
| H | -5.55138300 | -0.17900400 | -1.03523800 |
| H | 1.86439000  | -1.69331400 | 1.55583100  |
| H | 1.02551900  | -3.66279300 | 2.75629800  |
| H | -1.34631900 | -4.37353500 | 2.46651700  |

|   |             |             |             |
|---|-------------|-------------|-------------|
| H | -2.83772600 | -3.07516400 | 1.01090900  |
| H | -0.03682800 | 2.04334700  | -1.74035300 |
| H | 1.71728700  | 2.50120100  | -0.44182000 |
| H | -1.00538300 | 0.45806600  | 2.17627300  |
| H | 1.29056900  | 4.60165400  | 0.75531800  |
| H | -1.39547400 | 2.54842200  | 3.39721200  |
| H | -0.26306900 | 4.64573900  | 2.69543400  |
| H | 1.44779900  | -1.23842300 | -2.33494100 |
| H | 2.87718600  | 0.72289000  | 1.19704300  |
| H | 3.76856000  | -1.78740400 | -2.96745700 |
| H | 5.18915800  | 0.17434600  | 0.57569300  |
| H | 5.66003300  | -1.08263000 | -1.51642200 |

#### 14-radical

|   |             |             |             |
|---|-------------|-------------|-------------|
| C | 3.91319600  | 0.75888800  | -2.09284800 |
| C | 2.53224800  | 0.82311900  | -2.19531400 |
| C | 1.73612900  | 0.13521100  | -1.26960600 |
| C | 2.31280800  | -0.66015600 | -0.25780100 |
| C | 3.71116200  | -0.68600200 | -0.17041400 |
| C | 4.50667900  | 0.01312600  | -1.07037700 |
| C | 1.43143100  | -1.45948400 | 0.60781900  |
| C | 0.05416500  | -1.17012700 | 0.65490200  |
| C | -0.78389100 | -1.94742800 | 1.45849600  |
| C | -0.28071600 | -3.00265200 | 2.21289800  |
| C | 1.07856600  | -3.30425700 | 2.15648800  |
| C | 1.91928400  | -2.54447100 | 1.35507200  |
| N | 0.33566000  | 0.22468600  | -1.36364800 |
| O | -0.19410000 | 0.77914700  | -2.38130400 |
| C | -0.51033300 | 0.02938400  | -0.12082200 |
| C | -1.94963000 | -0.26670500 | -0.57584800 |
| C | -3.05074100 | 0.36212100  | 0.00430600  |
| C | -2.17380600 | -1.25515800 | -1.54296100 |
| C | -4.35043200 | 0.01557300  | -0.37421000 |
| C | -3.46517800 | -1.59535000 | -1.92603400 |
| C | -4.56239200 | -0.96047900 | -1.34104900 |
| C | -0.39809200 | 1.34348200  | 0.69277300  |
| C | -0.06997800 | 1.35194700  | 2.05032600  |
| C | -0.63723200 | 2.56794700  | 0.05245500  |
| C | 0.01330400  | 2.55421800  | 2.75560800  |
| C | -0.54966800 | 3.76517400  | 0.75514300  |
| C | -0.22519500 | 3.76400700  | 2.11220800  |
| H | 4.52944800  | 1.30257900  | -2.79960000 |
| H | 2.04373200  | 1.40187900  | -2.96663100 |
| H | 4.18624100  | -1.25917800 | 0.61577800  |
| H | 5.58568400  | -0.02203500 | -0.97596900 |
| H | -1.84264400 | -1.72624200 | 1.49410600  |

|   |             |             |             |
|---|-------------|-------------|-------------|
| H | -0.94939100 | -3.59148300 | 2.83014100  |
| H | 1.47982800  | -4.13636200 | 2.72383500  |
| H | 2.96705500  | -2.80978200 | 1.29267100  |
| H | -2.90471700 | 1.12607200  | 0.75675500  |
| H | -1.33150600 | -1.75536900 | -2.00533200 |
| H | -5.19291100 | 0.51651000  | 0.08953100  |
| H | -3.61706000 | -2.35557000 | -2.68412900 |
| H | -5.57027900 | -1.22579600 | -1.64001200 |
| H | 0.12274300  | 0.42213400  | 2.56923000  |
| H | -0.89025900 | 2.57767400  | -1.00070400 |
| H | 0.27007000  | 2.53800500  | 3.80903000  |
| H | -0.73574500 | 4.70159900  | 0.24098100  |
| H | -0.15722300 | 4.69781500  | 2.65902400  |

### Entry 15

|   |             |             |             |
|---|-------------|-------------|-------------|
| C | -0.63944700 | 0.59711800  | -0.08155500 |
| C | -0.70936500 | -0.63903800 | -0.73327800 |
| C | -1.91653400 | -1.27230100 | -0.97710500 |
| C | -3.10680700 | -0.67279700 | -0.55323800 |
| C | -3.01104100 | 0.59690200  | 0.02787400  |
| C | -1.81698400 | 1.30613600  | 0.25181700  |
| C | 0.67557600  | -1.06717800 | -1.19962500 |
| C | 1.60032600  | -0.23839900 | -0.19553300 |
| N | 0.73312500  | 0.97640200  | 0.01661500  |
| O | 1.10628200  | 1.71238000  | 1.16256300  |
| C | 0.91307900  | -2.58430800 | -1.21944400 |
| C | 0.83812900  | -0.54763200 | -2.65358100 |
| C | 1.83182100  | -0.93090600 | 1.17974400  |
| C | 3.04406800  | -0.77289900 | 1.86908600  |
| C | 0.80472400  | -1.62471300 | 1.84581600  |
| C | 3.23893200  | -1.31378700 | 3.13969100  |
| C | 0.99687600  | -2.16475400 | 3.11624700  |
| C | 2.21847000  | -2.01958200 | 3.76891200  |
| C | 2.92586600  | 0.16964600  | -0.84829700 |
| C | 3.18043400  | 1.49022400  | -1.22615300 |
| C | 3.90504000  | -0.79608100 | -1.12347800 |
| C | 4.37063300  | 1.83516500  | -1.86747300 |
| C | 5.09030900  | -0.45557000 | -1.76976600 |
| C | 5.32920300  | 0.86542600  | -2.14669300 |
| C | -4.48608200 | -1.33703000 | -0.72267700 |
| C | -5.39805100 | -0.44445900 | -1.59665400 |
| C | -4.38603200 | -2.71826400 | -1.39660700 |
| C | -5.14099700 | -1.52879100 | 0.66554300  |
| C | -1.89561900 | 2.76869000  | 0.76458700  |
| C | -1.58860400 | 2.86001100  | 2.27906100  |

|   |             |             |             |
|---|-------------|-------------|-------------|
| C | -0.93988400 | 3.68040300  | -0.04011800 |
| C | -3.31380000 | 3.35793800  | 0.56808200  |
| H | -1.92278500 | -2.23094500 | -1.47896000 |
| H | -3.93471500 | 1.07900300  | 0.31034100  |
| H | 1.06744500  | 1.09818600  | 1.91732300  |
| H | 0.21534800  | -3.05113100 | -1.92001500 |
| H | 1.91859300  | -2.81327600 | -1.57873200 |
| H | 0.78098100  | -3.05787000 | -0.24792100 |
| H | 1.81385800  | -0.81274400 | -3.06541700 |
| H | 0.06565600  | -1.00316700 | -3.27841100 |
| H | 0.72411300  | 0.53562900  | -2.71025300 |
| H | 3.85072600  | -0.21414700 | 1.41530400  |
| H | -0.16186700 | -1.74596600 | 1.37845200  |
| H | 4.19224700  | -1.17286000 | 3.63697200  |
| H | 0.18372600  | -2.70017000 | 3.59383700  |
| H | 2.36859600  | -2.44232700 | 4.75594400  |
| H | 2.43937600  | 2.24915100  | -1.01749600 |
| H | 3.75166400  | -1.82438000 | -0.81919900 |
| H | 4.54456400  | 2.86815800  | -2.14842800 |
| H | 5.82914800  | -1.22274300 | -1.97425300 |
| H | 6.25292400  | 1.13376700  | -2.64705300 |
| H | -5.55576100 | 0.53886300  | -1.14794500 |
| H | -4.96119100 | -0.29324100 | -2.58764200 |
| H | -6.37923700 | -0.91276900 | -1.72485200 |
| H | -3.77524700 | -3.41268700 | -0.81288200 |
| H | -5.38393500 | -3.15555700 | -1.48910500 |
| H | -3.96260600 | -2.65136000 | -2.40275700 |
| H | -6.12338700 | -2.00088100 | 0.56305800  |
| H | -4.52239400 | -2.16652100 | 1.30335300  |
| H | -5.28141100 | -0.57657700 | 1.18260600  |
| H | -0.55808600 | 2.59336700  | 2.50026200  |
| H | -1.75274800 | 3.88442800  | 2.62949600  |
| H | -2.25239700 | 2.20141900  | 2.84705700  |
| H | 0.10228600  | 3.39640700  | 0.07368100  |
| H | -1.19426200 | 3.65666800  | -1.10411400 |
| H | -1.04557700 | 4.71367200  | 0.30497600  |
| H | -3.29055900 | 4.41868500  | 0.83056000  |
| H | -3.65055600 | 3.27768200  | -0.46876500 |
| H | -4.06009500 | 2.88736100  | 1.21305100  |

### 15-radical

|   |            |             |             |
|---|------------|-------------|-------------|
| C | 0.64590200 | 0.45700100  | -0.39782700 |
| C | 0.70239300 | -0.93915900 | -0.25695200 |
| C | 1.90648300 | -1.60869200 | -0.13285600 |
| C | 3.10309100 | -0.88564300 | -0.15196700 |
| C | 3.01699500 | 0.50595100  | -0.31739100 |



|   |             |             |             |
|---|-------------|-------------|-------------|
| C | 1.83186900  | 1.24109400  | -0.44951600 |
| C | -0.68296200 | -1.55852400 | -0.37731000 |
| C | -1.61316000 | -0.32164600 | -0.01404200 |
| N | -0.71560300 | 0.83006100  | -0.44708800 |
| O | -1.18302300 | 2.00735600  | -0.51755900 |
| C | -0.84498700 | -1.96077900 | -1.86902800 |
| C | -0.91780000 | -2.82447900 | 0.46052600  |
| C | -1.85205100 | -0.05577700 | 1.49335300  |
| C | -2.99719700 | 0.63868700  | 1.90474200  |
| C | -0.88149300 | -0.33980000 | 2.46605200  |
| C | -3.18910100 | 0.99261900  | 3.23907900  |
| C | -1.07279900 | 0.01015100  | 3.80060400  |
| C | -2.23232800 | 0.67218500  | 4.19715700  |
| C | -2.92250900 | -0.36243600 | -0.80313600 |
| C | -3.92488500 | -1.25276400 | -0.39158100 |
| C | -3.14234300 | 0.38679200  | -1.96289200 |
| C | -5.10218600 | -1.39933600 | -1.12012100 |
| C | -4.32460200 | 0.24501500  | -2.68976300 |
| C | -5.30830700 | -0.64865000 | -2.27614800 |
| C | 4.48308400  | -1.55138100 | -0.00730600 |
| C | 5.33281200  | -1.26449400 | -1.26788800 |
| C | 5.20576900  | -0.98258600 | 1.23660300  |
| C | 4.37856800  | -3.07866200 | 0.15941900  |
| C | 1.89868600  | 2.77615500  | -0.62781300 |
| C | 1.22895000  | 3.48574800  | 0.57408600  |
| C | 3.35448100  | 3.29019700  | -0.68852700 |
| C | 1.23261700  | 3.18786800  | -1.96329400 |
| H | 1.90768800  | -2.68485100 | -0.02421800 |
| H | 3.94554900  | 1.05483100  | -0.33875300 |
| H | -0.07140600 | -2.69078200 | -2.11968400 |
| H | -0.72688100 | -1.10584800 | -2.53660100 |
| H | -1.82033200 | -2.41230400 | -2.05792500 |
| H | -1.92766000 | -3.20492500 | 0.29195400  |
| H | -0.78691300 | -2.67371400 | 1.52973200  |
| H | -0.22706900 | -3.60887800 | 0.14023800  |
| H | -3.74738300 | 0.91691000  | 1.17764800  |
| H | 0.04701800  | -0.81993200 | 2.19106600  |
| H | -4.08798900 | 1.52835800  | 3.52350400  |
| H | -0.30647000 | -0.23093600 | 4.52909700  |
| H | -2.38086800 | 0.94497700  | 5.23595500  |
| H | -3.79327100 | -1.82896200 | 0.51628200  |
| H | -2.40102100 | 1.09872000  | -2.29540500 |
| H | -5.86014900 | -2.09580400 | -0.77889900 |
| H | -4.47382900 | 0.84272900  | -3.58218400 |
| H | -6.22654800 | -0.75542600 | -2.84263600 |
| H | 5.49284500  | -0.19420300 | -1.41590100 |

|   |            |             |             |
|---|------------|-------------|-------------|
| H | 4.84499600 | -1.65662700 | -2.16456600 |
| H | 6.31506000 | -1.73937000 | -1.17952000 |
| H | 5.35322000 | 0.09714400  | 1.16313900  |
| H | 4.63134700 | -1.18043800 | 2.14588400  |
| H | 6.19063400 | -1.44685200 | 1.34861800  |
| H | 3.80952400 | -3.35348700 | 1.05191200  |
| H | 5.37990100 | -3.50489100 | 0.26466900  |
| H | 3.90961900 | -3.55289200 | -0.70727800 |
| H | 0.17931800 | 3.21931400  | 0.67412100  |
| H | 1.29161700 | 4.57063900  | 0.44059600  |
| H | 1.74917900 | 3.23157300  | 1.50261000  |
| H | 3.90664200 | 3.09503000  | 0.23488500  |
| H | 3.91298900 | 2.86463000  | -1.52696600 |
| H | 3.33303500 | 4.37376400  | -0.82855300 |
| H | 1.73595400 | 2.70207500  | -2.80511700 |
| H | 1.32137900 | 4.27046100  | -2.10002000 |
| H | 0.17573800 | 2.93277400  | -1.98518000 |

### Entry 16

|   |             |             |             |
|---|-------------|-------------|-------------|
| N | 2.17772600  | 0.40611300  | -0.25639600 |
| C | 1.09805400  | -0.46547400 | -0.10693500 |
| O | 1.27328100  | -1.67512100 | -0.03672700 |
| C | -0.25591500 | 0.14707800  | -0.10961900 |
| C | -1.33456100 | -0.64747000 | -0.01849600 |
| C | -2.74133000 | -0.24273600 | -0.00656600 |
| C | -3.72770200 | -1.24193500 | 0.03871200  |
| C | -3.16060500 | 1.09956200  | -0.03509000 |
| C | -5.08163700 | -0.91826600 | 0.04962200  |
| C | -4.51091600 | 1.42337700  | -0.02298400 |
| C | -5.47852700 | 0.41644400  | 0.01848100  |
| C | 3.60065000  | -0.00333700 | 0.01969100  |
| C | 4.50902800  | 1.19639800  | -0.29856300 |
| C | 3.75500200  | -0.40559300 | 1.49603400  |
| C | 3.98719000  | -1.15737600 | -0.92322100 |
| O | 1.89223600  | 1.73691100  | 0.15177600  |
| H | -0.33630100 | 1.22154300  | -0.17625300 |
| H | -1.14631400 | -1.71587700 | 0.05220300  |
| H | -3.42169000 | -2.28246500 | 0.06433900  |
| H | -2.42548200 | 1.89521900  | -0.06132200 |
| H | -5.82470500 | -1.70696600 | 0.08369600  |
| H | -4.81422200 | 2.46422700  | -0.04356100 |
| H | -6.53163300 | 0.67362500  | 0.02844500  |
| H | 4.36796600  | 1.53801300  | -1.32907100 |
| H | 4.34025000  | 2.03244200  | 0.38019700  |
| H | 5.55012700  | 0.88296900  | -0.19684800 |
| H | 3.13473000  | -1.27248400 | 1.72633100  |

|   |            |             |             |
|---|------------|-------------|-------------|
| H | 4.79703000 | -0.66099900 | 1.70830100  |
| H | 3.46711200 | 0.42172800  | 2.14990800  |
| H | 5.05458300 | -1.36405500 | -0.80441100 |
| H | 3.42424000 | -2.06126100 | -0.70828200 |
| H | 3.80986700 | -0.87623000 | -1.96483600 |
| H | 2.03384600 | 2.26942200  | -0.64085100 |

### 16-radical

|   |             |             |             |
|---|-------------|-------------|-------------|
| N | 2.18205000  | 0.48603100  | -0.00003800 |
| C | 1.09361300  | -0.45136900 | -0.00002300 |
| O | 1.32297400  | -1.64910900 | 0.00006700  |
| C | -0.24881600 | 0.15278400  | -0.00003600 |
| C | -1.33107900 | -0.64634000 | 0.00002500  |
| C | -2.73440400 | -0.23856200 | 0.00001900  |
| C | -3.72424700 | -1.23591300 | -0.00004100 |
| C | -3.14619200 | 1.10681700  | 0.00007200  |
| C | -5.07650000 | -0.90682900 | -0.00006100 |
| C | -4.49507200 | 1.43499000  | 0.00005500  |
| C | -5.46641200 | 0.43047400  | -0.00001400 |
| C | 3.63870300  | 0.03471100  | 0.00000500  |
| C | 4.50959200  | 1.29459700  | -0.00008100 |
| C | 3.90945700  | -0.78621000 | 1.27357400  |
| C | 3.90947200  | -0.78639300 | -1.27344200 |
| O | 1.92185500  | 1.73274000  | -0.00009300 |
| H | -0.30956300 | 1.23054100  | -0.00010000 |
| H | -1.14986200 | -1.71860600 | 0.00007600  |
| H | -3.42249300 | -2.27803000 | -0.00007600 |
| H | -2.40728100 | 1.89921100  | 0.00013300  |
| H | -5.82354900 | -1.69234900 | -0.00011000 |
| H | -4.79456100 | 2.47698100  | 0.00009900  |
| H | -6.51851900 | 0.69185700  | -0.00002600 |
| H | 4.32929200  | 1.90939300  | -0.88253900 |
| H | 4.32927800  | 1.90952300  | 0.88228300  |
| H | 5.55662600  | 0.98253900  | -0.00005000 |
| H | 3.32485600  | -1.70392600 | 1.29290000  |
| H | 4.97067800  | -1.04720500 | 1.30821100  |
| H | 3.67891800  | -0.19795500 | 2.16578600  |
| H | 4.97069600  | -1.04737800 | -1.30803900 |
| H | 3.32488400  | -1.70412000 | -1.29263800 |
| H | 3.67892700  | -0.19827300 | -2.16574200 |

### Entry 17

|   |             |             |             |
|---|-------------|-------------|-------------|
| N | -2.14850600 | -0.40781300 | -0.27304100 |
| C | -1.12496200 | 0.50849400  | -0.05427200 |

|   |             |             |             |
|---|-------------|-------------|-------------|
| O | -1.35184000 | 1.69953100  | 0.07495200  |
| C | 2.75878900  | 0.47648800  | -0.01883400 |
| C | 3.39187100  | 0.18033600  | 1.19401000  |
| C | 3.44779000  | 0.20695300  | -1.20685500 |
| C | 4.67063900  | -0.37308600 | 1.22062900  |
| C | 4.72703000  | -0.34646500 | -1.18643100 |
| C | 5.34301300  | -0.63992500 | 0.02891600  |
| C | -3.59811200 | -0.11056700 | 0.00709000  |
| C | -4.42133200 | -1.34097400 | -0.40848000 |
| C | -3.79591800 | 0.17923900  | 1.50416400  |
| C | -4.04353600 | 1.08063100  | -0.86007300 |
| C | 1.35723900  | 1.04569800  | -0.04501400 |
| C | 0.28936900  | -0.05900900 | -0.04115200 |
| O | -1.77241300 | -1.73467300 | 0.06575500  |
| H | 2.88016000  | 0.39288600  | 2.12780800  |
| H | 2.98011600  | 0.44110000  | -2.15849600 |
| H | 5.14433000  | -0.59018700 | 2.17184200  |
| H | 5.24476500  | -0.54249100 | -2.11912900 |
| H | 6.33975700  | -1.06611200 | 0.04753100  |
| H | -4.24836700 | -1.59584300 | -1.45877700 |
| H | -4.20037400 | -2.21139600 | 0.20927900  |
| H | -5.48210100 | -1.10666300 | -0.29663000 |
| H | -4.85472200 | 0.35032600  | 1.71756100  |
| H | -3.46049300 | -0.66924600 | 2.10624200  |
| H | -3.23924500 | 1.06872500  | 1.80291600  |
| H | -3.83908300 | 0.88306800  | -1.91580900 |
| H | -5.12238000 | 1.21556000  | -0.74269400 |
| H | -3.53856300 | 1.99955200  | -0.57524500 |
| H | 1.19845400  | 1.69938100  | 0.81549300  |
| H | 1.22419600  | 1.67192100  | -0.93092100 |
| H | 0.39683700  | -0.69692700 | 0.84178300  |
| H | 0.42467300  | -0.72725700 | -0.89676700 |
| H | -1.82568400 | -2.22744300 | -0.76254100 |

### 17-radical

|   |             |             |             |
|---|-------------|-------------|-------------|
| N | -2.15655800 | 0.50308900  | -0.00003200 |
| O | -1.81132000 | 1.72994500  | 0.00017000  |
| C | -1.12061100 | -0.48062500 | 0.00002900  |
| O | -1.39216000 | -1.66333200 | 0.00027200  |
| C | 2.75449500  | -0.46448900 | -0.00014200 |
| C | 3.41561800  | -0.18426400 | -1.20123700 |
| C | 3.41543700  | -0.18438600 | 1.20108700  |
| C | 4.69660800  | 0.36481200  | -1.20402800 |
| C | 4.69642200  | 0.36469400  | 1.20412600  |
| C | 5.34144200  | 0.64238000  | 0.00011100  |

|   |             |             |             |
|---|-------------|-------------|-------------|
| C | -3.63777300 | 0.14103500  | -0.00006800 |
| C | -4.42974100 | 1.45172600  | 0.00024900  |
| C | -3.95536100 | -0.66328600 | -1.27282200 |
| C | -3.95522700 | -0.66385300 | 1.27236200  |
| C | 1.35066700  | -1.02943600 | -0.00029000 |
| C | 0.28623000  | 0.07810400  | 0.00017900  |
| H | 2.92485600  | -0.40460100 | -2.14443500 |
| H | 2.92454500  | -0.40483100 | 2.14419400  |
| H | 5.19277600  | 0.57076600  | -2.14612800 |
| H | 5.19244700  | 0.57055200  | 2.14632100  |
| H | 6.33943100  | 1.06591600  | 0.00020900  |
| H | -4.21215400 | 2.05453700  | 0.88264100  |
| H | -4.21216000 | 2.05494400  | -0.88186800 |
| H | -5.49424000 | 1.20555700  | 0.00019400  |
| H | -5.02960600 | -0.86297700 | -1.30823100 |
| H | -3.69064300 | -0.09080200 | -2.16577100 |
| H | -3.42574100 | -1.61414300 | -1.29061800 |
| H | -3.69039500 | -0.09177500 | 2.16553700  |
| H | -5.02946900 | -0.86355700 | 1.30781000  |
| H | -3.42560600 | -1.61472200 | 1.28966500  |
| H | 1.20484200  | -1.66907300 | -0.87445000 |
| H | 1.20491000  | -1.66978900 | 0.87335700  |
| H | 0.40033800  | 0.73787200  | -0.86555900 |
| H | 0.40038100  | 0.73712700  | 0.86649200  |

### Entry 18

|   |             |             |             |
|---|-------------|-------------|-------------|
| N | 4.31242700  | 0.49269100  | 0.22316400  |
| C | 5.69224600  | -0.07253800 | 0.01155100  |
| C | 5.82382800  | -0.62068300 | -1.41921900 |
| C | 6.70734600  | 1.05976400  | 0.23982800  |
| C | 5.95209900  | -1.16898200 | 1.06023100  |
| C | 3.15238300  | -0.27157000 | 0.12496200  |
| O | 3.18942000  | -1.48883400 | 0.18047900  |
| C | 1.84634600  | 0.50318100  | 0.00014100  |
| C | 0.61443400  | -0.39558500 | 0.11216600  |
| C | -0.69611700 | 0.38467100  | -0.03964900 |
| C | -1.94273800 | -0.50306800 | 0.04879200  |
| C | -3.25900500 | 0.26606500  | -0.11103200 |
| C | -4.50295800 | -0.62678000 | -0.03769500 |
| C | -5.82140800 | 0.13585100  | -0.21337800 |
| C | -7.05753500 | -0.77081100 | -0.15106100 |
| C | -8.39457600 | -0.05868000 | -0.40861100 |
| C | -8.78862000 | 0.96390400  | 0.66339700  |
| H | 5.12828300  | -1.44495000 | -1.58291600 |
| H | 5.62152900  | 0.16618000  | -2.15064200 |

|   |             |             |             |
|---|-------------|-------------|-------------|
| H | 6.83917300  | -0.98968400 | -1.58930900 |
| H | 6.58707900  | 1.50460600  | 1.23268400  |
| H | 7.71532200  | 0.64290500  | 0.18572500  |
| H | 6.62418100  | 1.84353700  | -0.51306700 |
| H | 6.99307800  | -1.49387300 | 0.97754500  |
| H | 5.79778300  | -0.77762600 | 2.06944900  |
| H | 5.30039200  | -2.02668000 | 0.91812100  |
| H | 1.85603900  | 1.03156800  | -0.95946700 |
| H | 1.82304400  | 1.29087000  | 0.76093100  |
| H | 0.67106800  | -1.18020300 | -0.64812000 |
| H | 0.62842600  | -0.91471900 | 1.07607100  |
| H | -0.75233700 | 1.16365800  | 0.73235600  |
| H | -0.69759000 | 0.91228700  | -1.00263300 |
| H | -1.88375200 | -1.28269300 | -0.72140000 |
| H | -1.94445600 | -1.02908200 | 1.01209300  |
| H | -3.25254100 | 0.79766200  | -1.07159000 |
| H | -3.32312300 | 1.04104600  | 0.66394800  |
| H | -4.43222400 | -1.40681000 | -0.80683700 |
| H | -4.51461700 | -1.15250300 | 0.92593600  |
| H | -5.88842800 | 0.91460200  | 0.55532900  |
| H | -5.80946900 | 0.65990300  | -1.17846000 |
| H | -6.93985700 | -1.57355900 | -0.88930400 |
| H | -7.09567600 | -1.26447400 | 0.82915700  |
| H | -9.18413400 | -0.81509800 | -0.48314100 |
| H | -8.35599000 | 0.43536200  | -1.38753600 |
| H | -8.83522700 | 0.49704400  | 1.65294800  |
| H | -8.07636100 | 1.79137300  | 0.72118500  |
| H | -9.77226900 | 1.39375900  | 0.45396700  |
| O | 4.15315200  | 1.79838100  | -0.31333700 |
| H | 4.29073300  | 2.39194200  | 0.43516400  |

### 18-radical

|   |             |             |             |
|---|-------------|-------------|-------------|
| N | 4.34467900  | 0.54609500  | -0.06801000 |
| O | 4.20294900  | 1.79290000  | -0.29174900 |
| C | 5.74778400  | -0.03800100 | 0.05166800  |
| C | 5.93902900  | -1.11300800 | -1.03271100 |
| C | 6.74121000  | 1.10645800  | -0.16949000 |
| C | 5.92629600  | -0.62136900 | 1.46436300  |
| C | 3.16290700  | -0.24771900 | 0.06982000  |
| O | 3.24547200  | -1.43709300 | 0.29492900  |
| C | 1.86354100  | 0.51282600  | -0.08225400 |
| C | 0.63438400  | -0.39071300 | 0.02094400  |
| C | -0.67745100 | 0.39079900  | -0.11273900 |
| C | -1.92223300 | -0.50105100 | -0.04292700 |
| C | -3.23994100 | 0.27380500  | -0.15731100 |
| C | -4.48329900 | -0.62155900 | -0.10940700 |

|   |             |             |             |
|---|-------------|-------------|-------------|
| C | -5.80342800 | 0.15116900  | -0.21464300 |
| C | -7.04028200 | -0.75582900 | -0.18176600 |
| C | -8.38131300 | -0.02416000 | -0.34888000 |
| C | -8.74359300 | 0.91433700  | 0.80786400  |
| H | 5.26659800  | -1.95640400 | -0.88685900 |
| H | 5.77081900  | -0.69106000 | -2.02719500 |
| H | 6.96880000  | -1.47793800 | -0.99270200 |
| H | 6.62060700  | 1.89506700  | 0.57400400  |
| H | 7.75204000  | 0.70008100  | -0.08603000 |
| H | 6.62666900  | 1.55439900  | -1.15734600 |
| H | 6.95212600  | -0.98349900 | 1.57317600  |
| H | 5.75950000  | 0.14867700  | 2.22229200  |
| H | 5.24534500  | -1.45130600 | 1.64509000  |
| H | 1.88716200  | 1.04848400  | -1.03700300 |
| H | 1.84202000  | 1.30320000  | 0.67649500  |
| H | 0.68598600  | -1.16317300 | -0.75344400 |
| H | 0.65261500  | -0.92447700 | 0.97640800  |
| H | -0.73168200 | 1.15070200  | 0.67771200  |
| H | -0.68088900 | 0.94110500  | -1.06265700 |
| H | -1.87274300 | -1.25154500 | -0.84229800 |
| H | -1.91284600 | -1.06216000 | 0.90034200  |
| H | -3.24319200 | 0.84664300  | -1.09382600 |
| H | -3.29545200 | 1.01429000  | 0.65122000  |
| H | -4.42942400 | -1.35757100 | -0.92211500 |
| H | -4.47680100 | -1.20001800 | 0.82361000  |
| H | -5.85340600 | 0.88242900  | 0.60050600  |
| H | -5.80931200 | 0.73214200  | -1.14660600 |
| H | -6.94696700 | -1.50421100 | -0.97840100 |
| H | -7.05214200 | -1.31804700 | 0.76156700  |
| H | -9.17513500 | -0.77168100 | -0.45950700 |
| H | -8.36700200 | 0.54267300  | -1.28823800 |
| H | -8.76638600 | 0.37357000  | 1.75988800  |
| H | -8.02776600 | 1.73444400  | 0.91007500  |
| H | -9.73091800 | 1.36016800  | 0.65729000  |

### Entry 19

|   |             |             |             |
|---|-------------|-------------|-------------|
| N | 2.35769800  | -0.03553800 | 0.37597600  |
| C | 1.38525300  | -0.63387600 | -0.38990500 |
| O | 1.64184800  | -1.50037700 | -1.21042800 |
| C | 3.83528400  | -0.10487100 | 0.05881600  |
| C | 4.28134200  | -1.57805100 | 0.06209600  |
| C | 4.09543600  | 0.56046500  | -1.30233600 |
| C | 4.59749700  | 0.63683700  | 1.16725400  |
| C | -0.06637100 | -0.26437800 | -0.15467300 |
| C | -0.96138500 | -1.33311200 | -0.05653200 |
| C | -0.55736700 | 1.04263900  | -0.17901200 |

|   |             |             |             |
|---|-------------|-------------|-------------|
| C | -2.32143600 | -1.07469500 | 0.05629400  |
| C | -1.93038900 | 1.24989000  | -0.09658300 |
| C | -2.84093200 | 0.21173200  | 0.03304600  |
| N | -2.44504800 | 2.64219500  | -0.13606900 |
| O | -1.62700700 | 3.54106300  | -0.27153100 |
| O | -3.65227000 | 2.79893000  | -0.02929600 |
| N | -3.26058800 | -2.21627200 | 0.19462200  |
| O | -4.45489900 | -1.95952200 | 0.23362800  |
| O | -2.77687300 | -3.33660700 | 0.26420900  |
| O | 1.94750000  | 1.12702400  | 1.06180800  |
| H | 3.81452000  | -2.14609400 | -0.73823000 |
| H | 4.03631300  | -2.05169800 | 1.01643100  |
| H | 5.36651600  | -1.61503100 | -0.06517800 |
| H | 3.57070400  | 0.03383200  | -2.10057700 |
| H | 3.77106600  | 1.60432100  | -1.28969100 |
| H | 5.16500500  | 0.54104000  | -1.52699400 |
| H | 4.35888200  | 1.69969000  | 1.19328300  |
| H | 5.66710300  | 0.53274700  | 0.97529700  |
| H | 4.39861800  | 0.20205000  | 2.15158300  |
| H | -0.60553300 | -2.35393500 | -0.07631000 |
| H | 0.09916700  | 1.89441500  | -0.26655800 |
| H | -3.90257800 | 0.39517600  | 0.10867800  |
| H | 1.96780600  | 0.89123100  | 1.99866200  |

### 19-radical

|   |             |             |             |
|---|-------------|-------------|-------------|
| N | -2.36810000 | -0.14834800 | 0.27324400  |
| O | -2.00540800 | -1.08074700 | 1.06050300  |
| C | -1.37258200 | 0.70051200  | -0.27814900 |
| O | -1.67211500 | 1.72831900  | -0.85093000 |
| C | -3.86071000 | 0.08816000  | 0.03285700  |
| C | -4.61027200 | -1.08372100 | 0.67328400  |
| C | -4.26595300 | 1.40862300  | 0.71104900  |
| C | -4.12679200 | 0.11595500  | -1.48146800 |
| C | 0.06606400  | 0.29352800  | -0.11260300 |
| C | 0.99141000  | 1.33874100  | -0.04116300 |
| C | 0.51858400  | -1.02919700 | -0.13558700 |
| C | 2.34529100  | 1.04356500  | 0.04187700  |
| C | 1.88525700  | -1.27205700 | -0.07775100 |
| C | 2.82636100  | -0.25746500 | 0.02407700  |
| N | 2.36219700  | -2.67850700 | -0.12160200 |
| O | 1.52255600  | -3.55147200 | -0.28411700 |
| O | 3.56255000  | -2.86723700 | 0.00523900  |
| N | 3.31946200  | 2.16008500  | 0.14463700  |
| O | 4.50503200  | 1.86736100  | 0.18496600  |
| O | 2.86924200  | 3.29535700  | 0.18352400  |
| H | -4.44596200 | -1.13085300 | 1.74962100  |



|   |             |             |             |
|---|-------------|-------------|-------------|
| H | -4.30985900 | -2.03996200 | 0.24196900  |
| H | -5.67744700 | -0.94172900 | 0.48962700  |
| H | -4.02329600 | 1.38397800  | 1.77640200  |
| H | -3.77437100 | 2.26520300  | 0.25309900  |
| H | -5.34716700 | 1.53711200  | 0.61595600  |
| H | -3.63549000 | 0.95567300  | -1.96928700 |
| H | -5.20327600 | 0.20658300  | -1.64514400 |
| H | -3.79542200 | -0.81411100 | -1.95088900 |
| H | 0.65993400  | 2.36787100  | -0.05157000 |
| H | -0.16111000 | -1.86460800 | -0.19912300 |
| H | 3.88375100  | -0.47029200 | 0.08335700  |

### Entry 20

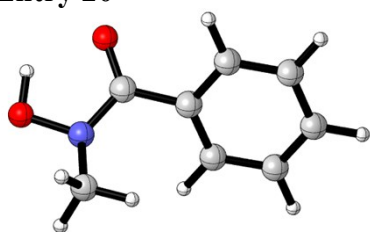

|   |            |            |            |
|---|------------|------------|------------|
| N | -2.1472141 | -0.1897924 | -0.1408259 |
| O | -3.4774132 | 0.2461636  | -0.2479829 |
| C | -1.2305471 | 0.8087676  | -0.3218759 |
| O | -1.6271531 | 1.9414476  | -0.6087829 |
| C | 0.2211309  | 0.4715826  | -0.2275329 |
| C | 0.7620088  | -0.6891154 | -0.7921819 |
| C | 1.0707659  | 1.4040096  | 0.3784171  |
| C | 2.1339438  | -0.9227604 | -0.7309599 |
| C | 2.4384418  | 1.1598246  | 0.4512421  |
| C | 2.9725418  | -0.0040704 | -0.1018549 |
| C | -2.0641372 | -1.3382154 | 0.7442601  |
| H | -3.3545542 | 1.1944266  | -0.4710169 |
| H | 0.1165498  | -1.3932144 | -1.3043559 |
| H | 0.6482849  | 2.3166856  | 0.7806281  |
| H | 2.5481588  | -1.8167994 | -1.1829109 |
| H | 3.0893589  | 1.8814416  | 0.9314591  |
| H | 4.0396909  | -0.1887654 | -0.0529079 |
| H | -2.5905712 | -2.1820464 | 0.2945211  |
| H | -1.0207692 | -1.6005964 | 0.8965701  |
| H | -2.5285172 | -1.0989734 | 1.7060911  |

### 20-radical

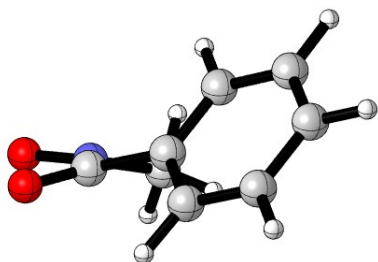

|   |            |            |            |
|---|------------|------------|------------|
| N | -2.3948801 | 0.0295267  | 0.2315143  |
| O | -3.5876181 | -0.3632743 | 0.4141433  |
| C | -1.4559901 | -0.8852473 | -0.3730197 |
| O | -1.8630841 | -1.8722173 | -0.9347797 |
| C | -0.0017541 | -0.5619453 | -0.2460377 |
| C | 0.8271659  | -0.8369253 | -1.3404307 |
| C | 0.5646969  | -0.1080983 | 0.9509623  |
| C | 2.1986479  | -0.6248133 | -1.2495077 |
| C | 1.9409459  | 0.0815377  | 1.0457383  |
| C | 2.7577389  | -0.1661323 | -0.0564977 |
| C | -2.1229161 | 1.4567577  | 0.4800773  |
| H | 0.3848569  | -1.2205813 | -2.2518507 |
| H | -0.0613381 | 0.0701627  | 1.8176163  |
| H | 2.8331019  | -0.8263203 | -2.1048847 |
| H | 2.3752539  | 0.4164817  | 1.9806263  |
| H | 3.8281429  | -0.0109053 | 0.0167503  |
| H | -1.1698371 | 1.7481967  | 0.0464793  |
| H | -2.1203471 | 1.6516947  | 1.5548123  |
| H | -2.9327871 | 2.0221027  | 0.0182893  |

### Entry 21

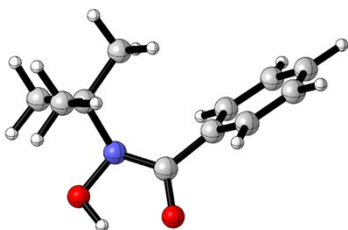

|   |           |            |            |
|---|-----------|------------|------------|
| N | 0.4422991 | -1.3499012 | -0.6291461 |
| O | 0.8971931 | -2.6637432 | -0.8885491 |
| C | 1.4489371 | -0.5911562 | -0.0764731 |
| O | 2.5534091 | -1.1117942 | 0.1132719  |
| C | 1.2638531 | 0.8714498  | 0.1671349  |
| C | 1.5607601 | 1.3884538  | 1.4322389  |
| C | 0.9459791 | 1.7425238  | -0.8787611 |
| C | 1.4914091 | 2.7597188  | 1.6597549  |
| C | 0.8984451 | 3.1162608  | -0.6528741 |
| C | 1.1593201 | 3.6260248  | 0.6179389  |

|   |            |            |            |
|---|------------|------------|------------|
| C | -1.0277289 | -1.4080332 | -0.3067681 |
| C | -1.6451649 | -0.0150072 | -0.1425881 |
| C | -1.2151109 | -2.2147962 | 0.9920239  |
| C | -1.7156189 | -2.1142262 | -1.4887371 |
| H | 1.8193451  | -2.6180182 | -0.5509111 |
| H | 1.8486601  | 0.7133418  | 2.2295099  |
| H | 0.7540551  | 1.3448938  | -1.8683271 |
| H | 1.7083801  | 3.1537358  | 2.6460949  |
| H | 0.6626641  | 3.7882318  | -1.4703041 |
| H | 1.1166801  | 4.6950108  | 0.7933669  |
| H | -1.2433509 | 0.5304728  | 0.7103559  |
| H | -1.5197039 | 0.5951638  | -1.0373231 |
| H | -2.7165559 | -0.1513932 | 0.0233549  |
| H | -0.7535969 | -1.7005222 | 1.8395579  |
| H | -2.2809159 | -2.3298072 | 1.2053569  |
| H | -0.7718889 | -3.2064902 | 0.9012599  |
| H | -2.7895609 | -2.1761512 | -1.2963981 |
| H | -1.5628469 | -1.5519592 | -2.4131211 |
| H | -1.3293459 | -3.1222842 | -1.6309391 |

### 21-radical

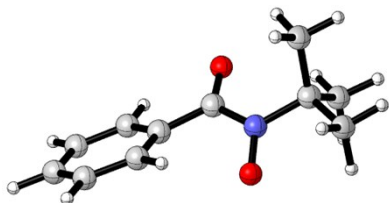

|   |            |            |            |
|---|------------|------------|------------|
| N | 0.8134438  | 0.0558003  | -0.1892661 |
| O | 1.3208997  | -1.0243847 | 0.2561089  |
| C | -0.6071433 | 0.1520333  | -0.3291491 |
| O | -1.0803843 | 1.0340353  | -1.0213241 |
| C | -1.4629533 | -0.8471757 | 0.3803409  |
| C | -1.1262173 | -1.4667727 | 1.5917769  |
| C | -2.7271602 | -1.0801007 | -0.1795981 |
| C | -2.0410132 | -2.3046367 | 2.2228699  |
| C | -3.6277132 | -1.9370188 | 0.4421669  |
| C | -3.2869792 | -2.5497607 | 1.6477039  |
| C | 1.7484547  | 1.1565843  | -0.6854771 |
| C | 1.7114027  | 1.1845213  | -2.2238671 |
| C | 1.3206277  | 2.5043982  | -0.0807041 |
| C | 3.1593238  | 0.8025952  | -0.2031931 |
| H | -0.1579623 | -1.2973038 | 2.0397299  |
| H | -2.9890533 | -0.5786287 | -1.1028871 |
| H | -1.7761153 | -2.7721058 | 3.1643229  |
| H | -4.5961583 | -2.1212387 | -0.0085461 |
| H | -3.9903672 | -3.2133608 | 2.1382519  |

|   |           |            |            |
|---|-----------|------------|------------|
| H | 0.7251188 | 1.4591323  | -2.5940651 |
| H | 1.9863648 | 0.2079823  | -2.6306511 |
| H | 2.4379427 | 1.9172933  | -2.5856761 |
| H | 0.3433047 | 2.8225523  | -0.4374951 |
| H | 1.2995978 | 2.4491273  | 1.0111629  |
| H | 2.0548908 | 3.2636302  | -0.3620061 |
| H | 3.2063608 | 0.7340163  | 0.8852659  |
| H | 3.8382488 | 1.5938373  | -0.5293601 |
| H | 3.5032388 | -0.1450507 | -0.6164361 |

## Entry 22

|   |             |             |             |
|---|-------------|-------------|-------------|
| N | -1.32302100 | -0.23135600 | -0.68616700 |
| C | -2.04492100 | 0.63601100  | 0.33208500  |
| C | -3.10064000 | 1.42731000  | -0.45457900 |
| C | -2.71803200 | -0.20381300 | 1.43363400  |
| C | -1.05300100 | 1.61898300  | 0.96800500  |
| C | -0.24473700 | -1.05355400 | -0.18663700 |
| O | -0.46197500 | -2.19461800 | 0.20806100  |
| C | 2.11834800  | -1.27717200 | 0.31183500  |
| C | 1.38497500  | 0.57069500  | -1.16094900 |
| C | 3.15478000  | -0.36271300 | 0.97096100  |
| C | 2.40768100  | 1.51899100  | -0.53178200 |
| C | 3.61412600  | 0.74691400  | 0.01759700  |
| N | 0.99472900  | -0.49150300 | -0.21838500 |
| O | -2.27040700 | -1.12278900 | -1.27932200 |
| H | -2.62670900 | 2.02962000  | -1.23343300 |
| H | -3.81618300 | 0.75636800  | -0.92891300 |
| H | -3.64129300 | 2.09547100  | 0.22129600  |
| H | -3.25037800 | 0.45823600  | 2.12207300  |
| H | -3.44692000 | -0.89832500 | 1.01283500  |
| H | -1.98751800 | -0.77691500 | 2.00896600  |
| H | -1.60274500 | 2.27984300  | 1.64249500  |
| H | -0.28236600 | 1.11402100  | 1.55250000  |
| H | -0.56978400 | 2.24311600  | 0.21409100  |
| H | 2.58179200  | -1.83803400 | -0.51302800 |
| H | 1.71861200  | -2.00678000 | 1.01281500  |
| H | 1.83237400  | 0.09137800  | -2.04492300 |
| H | 0.48971900  | 1.08862100  | -1.49094600 |
| H | 4.00512500  | -0.97029700 | 1.29557500  |
| H | 2.71678500  | 0.08184000  | 1.87202200  |
| H | 2.72563800  | 2.24482800  | -1.28675900 |
| H | 1.93148600  | 2.08270500  | 0.27727000  |
| H | 4.30370000  | 1.42689500  | 0.52640000  |
| H | 4.17076600  | 0.30129900  | -0.81693400 |
| H | -2.20646800 | -1.93453300 | -0.74247000 |

## 22-radical

|   |             |             |             |
|---|-------------|-------------|-------------|
| N | -1.19833300 | 0.26293100  | -0.43035000 |
| O | -1.16460400 | 1.07873400  | -1.41719300 |
| C | -2.50645800 | 0.07487000  | 0.30694500  |
| C | -3.17763200 | 1.45439500  | 0.37313300  |
| C | -3.38388700 | -0.91129800 | -0.48367700 |
| C | -2.23381100 | -0.43160500 | 1.73110800  |
| C | -0.11661600 | -0.70354100 | -0.31466300 |
| O | -0.38446400 | -1.87584400 | -0.10555400 |
| C | 2.24695400  | -1.16401000 | -0.62201200 |
| C | 1.53733200  | 1.20225900  | -0.48219500 |
| C | 3.30120200  | -0.95106900 | 0.46769600  |
| C | 2.58976600  | 1.46402300  | 0.60358800  |
| C | 3.78139900  | 0.50541900  | 0.48876200  |
| N | 1.13684300  | -0.21120300 | -0.48228000 |
| H | -2.55333900 | 2.17069500  | 0.91382200  |
| H | -3.37093500 | 1.85174400  | -0.62215700 |
| H | -4.12693900 | 1.35761300  | 0.90504900  |
| H | -2.91520700 | -1.89416700 | -0.53034200 |
| H | -4.35945900 | -1.00629600 | 0.00150900  |
| H | -3.54176900 | -0.54427100 | -1.50054800 |
| H | -3.17528200 | -0.44152100 | 2.28571300  |
| H | -1.82076400 | -1.43843400 | 1.73430400  |
| H | -1.54562500 | 0.23568800  | 2.25850700  |
| H | 2.69892100  | -1.01026700 | -1.61148000 |
| H | 1.83204100  | -2.16849800 | -0.58713600 |
| H | 1.94548900  | 1.44431000  | -1.47166200 |
| H | 0.66561000  | 1.83080800  | -0.33777000 |
| H | 4.13880500  | -1.63338600 | 0.29209800  |
| H | 2.86746100  | -1.21637100 | 1.43847300  |
| H | 2.92107100  | 2.50447500  | 0.52553100  |
| H | 2.11958000  | 1.34990900  | 1.58745300  |
| H | 4.48177600  | 0.66698200  | 1.31357300  |
| H | 4.33204400  | 0.71910200  | -0.43666200 |

## Entry 23

|   |             |             |             |
|---|-------------|-------------|-------------|
| C | -0.05634600 | 1.25558500  | -0.00000700 |
| C | 0.86228400  | 0.18810400  | -0.00000700 |
| C | 0.43873900  | -1.15314500 | 0.00001200  |
| C | -0.90460100 | -1.47958600 | 0.00001600  |
| C | -1.86582700 | -0.46352400 | -0.00000600 |
| C | -1.40537000 | 0.85818500  | -0.00001900 |
| C | 1.62566000  | -2.10530500 | 0.00003800  |
| C | 2.79812900  | -1.12997200 | -0.00000700 |

|   |             |             |             |
|---|-------------|-------------|-------------|
| N | 2.27918300  | 0.12759500  | 0.00004800  |
| O | 4.00627300  | -1.33787800 | -0.00010500 |
| C | 1.68853700  | -2.97889000 | 1.26901600  |
| C | 1.68853400  | -2.97899500 | -1.26886500 |
| C | -3.38014200 | -0.74504200 | -0.00002400 |
| C | -4.02445300 | -0.12387600 | -1.26162900 |
| C | -3.69123400 | -2.25342500 | -0.00007000 |
| C | -4.02447900 | -0.12395100 | 1.26160600  |
| C | 0.31280800  | 2.75707500  | 0.00002200  |
| C | 1.11354100  | 3.11033700  | 1.27728200  |
| C | 1.11336200  | 3.11043300  | -1.27732300 |
| C | -0.93942500 | 3.66039000  | 0.00015600  |
| O | 3.17429500  | 1.18596900  | -0.00013100 |
| H | -1.19452600 | -2.52244700 | 0.00003200  |
| H | -2.15008800 | 1.63963600  | -0.00003600 |
| H | 2.62119700  | -3.54728700 | 1.28505400  |
| H | 1.63878000  | -2.36877400 | 2.17370900  |
| H | 0.85116800  | -3.68075800 | 1.28397800  |
| H | 0.85117300  | -3.68087400 | -1.28376200 |
| H | 1.63876300  | -2.36895500 | -2.17360800 |
| H | 2.62120100  | -3.54738000 | -1.28486500 |
| H | -3.87870100 | 0.95796200  | -1.30167300 |
| H | -3.59394200 | -0.55263500 | -2.17083100 |
| H | -5.10197900 | -0.31549700 | -1.27218400 |
| H | -3.29066200 | -2.75288400 | 0.88655700  |
| H | -4.77405500 | -2.40431700 | -0.00006300 |
| H | -3.29068200 | -2.75282700 | -0.88673700 |
| H | -5.10200100 | -0.31559400 | 1.27213700  |
| H | -3.59397100 | -0.55274800 | 2.17079100  |
| H | -3.87875100 | 0.95788800  | 1.30170700  |
| H | 0.51522300  | 2.90253100  | 2.16941200  |
| H | 2.04699800  | 2.55720700  | 1.35053400  |
| H | 1.35639900  | 4.17773500  | 1.27819300  |
| H | 0.51493400  | 2.90265600  | -2.16938700 |
| H | 1.35619300  | 4.17783700  | -1.27820900 |
| H | 2.04681400  | 2.55731900  | -1.35071400 |
| H | -0.61742100 | 4.70477900  | 0.00004300  |
| H | -1.55889400 | 3.51015100  | -0.88786000 |
| H | -1.55861400 | 3.51026000  | 0.88838300  |
| H | 4.02832500  | 0.70272600  | -0.00018900 |

### 23-radical

|   |             |             |             |
|---|-------------|-------------|-------------|
| C | -0.06050600 | 1.26868300  | -0.00005100 |
| C | 0.89684300  | 0.22099100  | -0.00002300 |
| C | 0.51207900  | -1.12933000 | -0.00004700 |
| C | -0.82190000 | -1.49825700 | -0.00005900 |

|   |             |             |             |
|---|-------------|-------------|-------------|
| C | -1.80923800 | -0.51058100 | -0.00002600 |
| C | -1.39009600 | 0.83079800  | -0.00001700 |
| C | 1.70953000  | -2.05859200 | -0.00004300 |
| C | 2.87345500  | -1.07686600 | 0.00002400  |
| N | 2.32274600  | 0.25920500  | 0.00005300  |
| O | 4.05232800  | -1.29812300 | 0.00007200  |
| O | 3.07752800  | 1.27177400  | 0.00017400  |
| C | 1.78311000  | -2.93439000 | 1.26830700  |
| C | 1.78317900  | -2.93430900 | -1.26844400 |
| C | -3.31345200 | -0.83429900 | 0.00002500  |
| C | -3.97174800 | -0.22915000 | 1.26266200  |
| C | -3.97187800 | -0.22902500 | -1.26248200 |
| C | -3.58314600 | -2.35035100 | -0.00004000 |
| C | 0.25447700  | 2.78251600  | -0.00003500 |
| C | 1.04154300  | 3.16389400  | -1.27746300 |
| C | -1.03138800 | 3.63860500  | -0.00013600 |
| C | 1.04135700  | 3.16388900  | 1.27750600  |
| H | -1.08204000 | -2.54854700 | -0.00006900 |
| H | -2.16150800 | 1.58503900  | 0.00002200  |
| H | 0.95282600  | -3.64458600 | 1.28325100  |
| H | 1.73018300  | -2.32768100 | 2.17518700  |
| H | 2.72086000  | -3.49401700 | 1.28041500  |
| H | 0.95289500  | -3.64450300 | -1.28348000 |
| H | 2.72092900  | -3.49393700 | -1.28053700 |
| H | 1.73030300  | -2.32754300 | -2.17529000 |
| H | -3.85712200 | 0.85628800  | 1.30225600  |
| H | -3.52963000 | -0.64582000 | 2.17184700  |
| H | -5.04305800 | -0.45138900 | 1.27302100  |
| H | -3.85726300 | 0.85641800  | -1.30198400 |
| H | -3.52985700 | -0.64560400 | -2.17175700 |
| H | -5.04318900 | -0.45126400 | -1.27275000 |
| H | -3.17003000 | -2.83870700 | -0.88700100 |
| H | -4.66133600 | -2.53008300 | 0.00002200  |
| H | -3.16991200 | -2.83880600 | 0.88681100  |
| H | 0.45683900  | 2.92509800  | -2.17101900 |
| H | 2.00145600  | 2.65588900  | -1.33697200 |
| H | 1.23308400  | 4.24140000  | -1.28084900 |
| H | -1.64504000 | 3.46912800  | -0.88905800 |
| H | -1.64554300 | 3.46855600  | 0.88833100  |
| H | -0.74592800 | 4.69330200  | 0.00027800  |
| H | 0.45656400  | 2.92500100  | 2.17097800  |
| H | 1.23281500  | 4.24141100  | 1.28097000  |
| H | 2.00130600  | 2.65595800  | 1.33710600  |

**Entry 24**

|   |             |             |             |
|---|-------------|-------------|-------------|
| N | -0.36513000 | -0.02376400 | -0.04339400 |
| C | 0.78870000  | -0.71380600 | -0.00949000 |
| C | -1.72143500 | -0.50311900 | 0.01896400  |
| O | -0.25772500 | 1.36710000  | 0.00032900  |
| H | 0.64415900  | -1.80382000 | -0.02110700 |
| H | -2.29542000 | -0.12721500 | -0.83147200 |
| H | -1.69582800 | -1.59288200 | -0.01828300 |
| H | -2.20022200 | -0.18227200 | 0.94836300  |
| H | 0.71381900  | 1.49029400  | 0.01930700  |
| O | 1.88095100  | -0.15662600 | 0.01843400  |

#### 24-radical

|   |             |             |             |
|---|-------------|-------------|-------------|
| N | 0.42969000  | -0.14294600 | -0.00000300 |
| C | -0.92007300 | -0.54798400 | -0.00002100 |
| C | 0.81198200  | 1.27302300  | -0.00000900 |
| O | 1.33521400  | -1.03925900 | 0.00014700  |
| O | -1.84717400 | 0.22327000  | -0.00011800 |
| H | -0.98817200 | -1.64550300 | -0.00002600 |
| H | -0.09297000 | 1.87678000  | -0.00077600 |
| H | 1.40812000  | 1.47372700  | 0.89116000  |
| H | 1.40942000  | 1.47329400  | -0.89039500 |

#### Entry 25

|    |             |             |             |
|----|-------------|-------------|-------------|
| N  | -0.17992600 | 0.67436800  | -0.62429400 |
| C  | -1.34259000 | 0.33193800  | 0.07580000  |
| N  | 1.79127500  | -0.34360200 | 0.22961600  |
| O  | 2.85464500  | -0.80280100 | -0.11237500 |
| O  | 1.41472800  | -0.01991700 | 1.33332000  |
| N  | 0.80453600  | -0.22002000 | -0.84926200 |
| O  | -1.99992600 | 1.11686600  | 0.67646200  |
| Cl | -1.78141900 | -1.37391100 | -0.10020600 |
| O  | 0.21590300  | 2.01315700  | -0.49575800 |
| H  | 1.31546500  | -0.07039300 | -1.71568400 |
| H  | 0.23021400  | 2.20158500  | 0.45877500  |

#### 25-radical

|    |             |             |             |
|----|-------------|-------------|-------------|
| N  | -0.13676800 | 0.57397900  | 0.34992300  |
| C  | -1.10950200 | -0.49050300 | 0.30764900  |
| O  | -0.35805200 | 1.75830700  | -0.01749200 |
| N  | 2.06671700  | -0.14557700 | -0.23184000 |
| O  | 3.22483000  | -0.01084300 | 0.08272600  |
| O  | 1.58958400  | -0.58507600 | -1.24612300 |
| N  | 1.11959800  | 0.21523100  | 0.84112200  |
| O  | -0.87512600 | -1.58808000 | 0.67986700  |
| Cl | -2.63945000 | 0.04908400  | -0.34608200 |



|   |            |            |            |
|---|------------|------------|------------|
| H | 1.53094700 | 1.00869600 | 1.33125000 |
|---|------------|------------|------------|

### Entry 26

|    |             |             |             |
|----|-------------|-------------|-------------|
| N  | -0.85017200 | -0.18952400 | -0.07788200 |
| C  | 0.25982700  | 0.56154500  | -0.00067800 |
| C  | -1.08184700 | -1.61411700 | 0.04121200  |
| O  | -2.05346400 | 0.53217900  | -0.01082700 |
| H  | -1.78372100 | -1.91850900 | -0.73681700 |
| H  | -0.14081300 | -2.13832900 | -0.09167400 |
| H  | -1.50325300 | -1.84443900 | 1.02335400  |
| H  | -1.75602100 | 1.46079700  | 0.00505900  |
| O  | 0.25767100  | 1.76810900  | 0.04000400  |
| Cl | 1.79020400  | -0.37174800 | -0.00772800 |

### 26-radical

|    |             |             |             |
|----|-------------|-------------|-------------|
| N  | 0.86275900  | -0.34998200 | 0.00028900  |
| C  | -0.23050500 | 0.54354700  | 0.00112700  |
| C  | 2.21676100  | 0.24022000  | -0.00042700 |
| O  | 0.71822100  | -1.60809400 | 0.00013300  |
| O  | -0.08743900 | 1.72879200  | -0.00010800 |
| Cl | -1.80099100 | -0.25526500 | -0.00027400 |
| H  | 2.35248400  | 0.85784100  | 0.88804500  |
| H  | 2.91030400  | -0.59583900 | -0.00165000 |
| H  | 2.35096200  | 0.85920700  | -0.88816900 |

### Entry 27

|    |             |             |             |
|----|-------------|-------------|-------------|
| N  | 0.90595900  | -0.20929900 | 0.38017700  |
| C  | -0.23289800 | 0.59894800  | 0.02534600  |
| O  | -0.16666700 | 1.77332400  | -0.08827200 |
| Cl | -1.73674800 | -0.31412500 | 0.00423100  |
| F  | 0.76327900  | -1.52358900 | -0.15053200 |
| O  | 2.04116800  | 0.31740800  | -0.16764500 |
| H  | 2.71486700  | 0.19798700  | 0.51688700  |

### 27-radical

|    |             |             |             |
|----|-------------|-------------|-------------|
| N  | -0.86250600 | -0.35740000 | 0.00087000  |
| C  | 0.23774300  | 0.55788700  | -0.00001800 |
| O  | -0.90831400 | -1.56382000 | -0.00043600 |
| O  | 0.10944500  | 1.73377800  | -0.00020400 |
| Cl | 1.75739800  | -0.31223600 | 0.00000700  |
| F  | -2.09708000 | 0.34475800  | -0.00011000 |

### Entry 28

|   |             |             |            |
|---|-------------|-------------|------------|
| N | -0.42652900 | -0.40901600 | 0.50921200 |
| C | 0.50286300  | 0.56646200  | 0.13736100 |
| O | 0.30620700  | 1.73804800  | 0.14984400 |

|    |             |             |             |
|----|-------------|-------------|-------------|
| Cl | 2.11586000  | -0.12964900 | -0.18874800 |
| O  | -1.73137100 | 0.02375100  | 0.61506100  |
| C  | -2.35412900 | 0.31165800  | -0.66129100 |
| H  | -1.86259900 | 1.15832800  | -1.14284000 |
| H  | -2.33768600 | -0.57404200 | -1.29812600 |
| H  | -3.37948000 | 0.57180200  | -0.40500600 |
| O  | -0.32488500 | -1.64578400 | -0.13441600 |
| H  | -0.29617900 | -2.28577400 | 0.58986000  |

### 28-radical

|    |             |             |             |
|----|-------------|-------------|-------------|
| N  | 0.46818500  | -0.20243300 | -0.00004000 |
| C  | -0.72297500 | 0.57084900  | -0.00001500 |
| O  | 0.56247900  | -1.43561900 | -0.00004700 |
| O  | -0.74359700 | 1.75825500  | 0.00001500  |
| Cl | -2.15541200 | -0.45699200 | 0.00002600  |
| O  | 1.60452400  | 0.61878500  | -0.00009000 |
| C  | 2.82189200  | -0.14424300 | 0.00008600  |
| H  | 2.89593800  | -0.76479400 | 0.89430200  |
| H  | 2.89610600  | -0.76494400 | -0.89401000 |
| H  | 3.59191200  | 0.62463100  | 0.00009400  |

### Entry 29

|   |             |             |             |
|---|-------------|-------------|-------------|
| N | 0.41990100  | -0.02703100 | 0.38437400  |
| C | -0.84756100 | -0.61461400 | 0.05548500  |
| O | -1.85109600 | 0.00607100  | -0.10768900 |
| F | 0.44628300  | 1.31351000  | -0.06473800 |
| H | -0.75303900 | -1.71171400 | 0.08197000  |
| O | 1.43832700  | -0.70379200 | -0.25270700 |
| H | 2.18469600  | -0.65120300 | 0.36031700  |

### 29-radical

|   |             |             |             |
|---|-------------|-------------|-------------|
| N | 0.47907200  | -0.13423700 | -0.00000700 |
| C | -0.87340000 | -0.60570200 | -0.00006800 |
| O | 1.50746600  | -0.77219000 | 0.00001600  |
| O | -1.82555600 | 0.11225600  | 0.00003000  |
| F | 0.58678400  | 1.28405400  | -0.00000100 |
| H | -0.84944400 | -1.70314000 | 0.00009800  |

### Entry 30

|   |             |             |             |
|---|-------------|-------------|-------------|
| N | 0.41632200  | 0.00140300  | 0.35229700  |
| C | -0.79816100 | -0.65530800 | 0.10262900  |
| O | -1.82324100 | -0.06422300 | -0.12378400 |
| O | 0.41816300  | 1.35051900  | 0.03344200  |
| O | 1.47878700  | -0.68397300 | -0.27681700 |
| H | -0.68683900 | -1.74467300 | 0.18148400  |
| H | -0.23270400 | 1.46615800  | -0.68343600 |

|   |            |             |            |
|---|------------|-------------|------------|
| H | 2.20458000 | -0.61803700 | 0.35737600 |
|---|------------|-------------|------------|

### 30-radical

|   |             |             |             |
|---|-------------|-------------|-------------|
| N | 0.49066000  | -0.08972200 | -0.00003000 |
| C | -0.78644700 | -0.67566800 | -0.00007700 |
| O | 1.56016800  | -0.70102800 | 0.00003200  |
| O | -1.78204800 | 0.01601800  | 0.00004000  |
| O | 0.52595900  | 1.29814100  | -0.00000100 |
| H | -0.72754300 | -1.76823400 | 0.00009500  |
| H | -0.42103100 | 1.54524400  | 0.00000900  |

### Entry 31

|   |             |             |             |
|---|-------------|-------------|-------------|
| N | 0.41990100  | -0.02703100 | 0.38437400  |
| C | -0.84756100 | -0.61461400 | 0.05548500  |
| O | -1.85109600 | 0.00607100  | -0.10768900 |
| F | 0.44628300  | 1.31351000  | -0.06473800 |
| H | -0.75303900 | -1.71171400 | 0.08197000  |
| O | 1.43832700  | -0.70379200 | -0.25270700 |
| H | 2.18469600  | -0.65120300 | 0.36031700  |

### 31-radical

|   |             |             |             |
|---|-------------|-------------|-------------|
| N | 0.47907200  | -0.13423700 | -0.00000700 |
| C | -0.87340000 | -0.60570200 | -0.00006800 |
| O | 1.50746600  | -0.77219000 | 0.00001600  |
| O | -1.82555600 | 0.11225600  | 0.00003000  |
| F | 0.58678400  | 1.28405400  | -0.00000100 |
| H | -0.84944400 | -1.70314000 | 0.00009800  |

### Entry 32

|   |             |             |             |
|---|-------------|-------------|-------------|
| N | -0.11543500 | 0.28705700  | -0.47948500 |
| C | -1.07391100 | -0.68485600 | -0.17079400 |
| O | 1.18105000  | -0.17595000 | -0.68148700 |
| C | 1.85527200  | -0.51425500 | 0.55000200  |
| O | -2.14120100 | -0.46118100 | 0.33461500  |
| H | -0.74308300 | -1.66457300 | -0.55363500 |
| H | 1.92551200  | 0.35819700  | 1.20068800  |
| H | 1.33754700  | -1.33100700 | 1.06307700  |
| H | 2.84899700  | -0.83628900 | 0.24254400  |
| O | -0.16345200 | 1.44950100  | 0.28348100  |
| H | -0.26026700 | 2.15998400  | -0.36440400 |

### 32-radical

|   |             |             |             |
|---|-------------|-------------|-------------|
| N | -0.10185700 | 0.41257000  | -0.00005200 |
| O | 0.45839700  | 1.52238100  | -0.00003200 |
| C | -1.51009400 | 0.23526900  | 0.00007200  |
| O | 0.63091500  | -0.77444600 | -0.00026300 |

|   |             |             |             |
|---|-------------|-------------|-------------|
| C | 2.04850700  | -0.54551600 | 0.00015500  |
| O | -2.05306800 | -0.83510800 | 0.00006000  |
| H | -1.98683400 | 1.22452300  | 0.00012000  |
| H | 2.35792400  | -0.00122400 | 0.89379100  |
| H | 2.46306400  | -1.55151100 | 0.00009200  |
| H | 2.35841400  | -0.00091000 | -0.89311700 |

### Entry 33

|   |             |             |             |
|---|-------------|-------------|-------------|
| N | -0.58865800 | 0.09083400  | -0.24370100 |
| C | -1.66975700 | -0.83048700 | 0.05080700  |
| C | 0.74104700  | -0.27605200 | -0.03111200 |
| O | 1.07307100  | -1.44715800 | 0.03919500  |
| N | 1.61661100  | 0.77801300  | 0.07770500  |
| O | -0.91368800 | 1.44619700  | -0.03345800 |
| H | -1.33389700 | -1.83200200 | -0.20862900 |
| H | -1.94418100 | -0.81444200 | 1.11554100  |
| H | -2.53661800 | -0.56050500 | -0.55239100 |
| H | 1.33556300  | 1.68162900  | -0.27005700 |
| H | 2.58746600  | 0.52337500  | -0.01323300 |
| H | -1.00681200 | 1.56694700  | 0.92667400  |

### 33-radical

|   |             |             |             |
|---|-------------|-------------|-------------|
| N | 0.61287700  | -0.23252400 | 0.00010400  |
| O | 0.80238600  | -1.49391700 | 0.00015600  |
| C | 1.76640400  | 0.66843200  | -0.00015700 |
| C | -0.72880500 | 0.29600200  | 0.00005200  |
| O | -0.92543700 | 1.49446000  | 0.00016000  |
| N | -1.66472000 | -0.67765600 | -0.00039400 |
| H | 1.40875200  | 1.69440000  | 0.00068900  |
| H | 2.36602300  | 0.46944000  | 0.88983600  |
| H | 2.36485700  | 0.47058300  | -0.89120600 |
| H | -1.38488400 | -1.64597800 | 0.00031700  |
| H | -2.63304200 | -0.40813100 | 0.00049000  |

### Entry 34

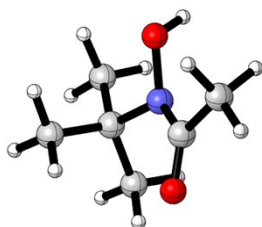

|   |           |            |            |
|---|-----------|------------|------------|
| N | 0.5344384 | 0.3464742  | -0.2678605 |
| C | 1.6648244 | -0.4410658 | -0.0727615 |
| O | 1.5908664 | -1.6539238 | 0.0242635  |
| C | 2.9923654 | 0.2896982  | -0.0385965 |

|   |            |            |            |
|---|------------|------------|------------|
| C | -1.0200396 | -0.4859048 | 1.4940235  |
| C | -0.8655226 | -0.1356998 | 0.0047895  |
| C | -1.8372486 | 0.9922882  | -0.3792215 |
| C | -1.1614046 | -1.3508288 | -0.8925515 |
| O | 0.7457864  | 1.7010072  | 0.1052405  |
| H | 3.1028914  | 0.9759072  | -0.8804675 |
| H | 3.0780664  | 0.8813792  | 0.8755385  |
| H | 3.7799394  | -0.4613998 | -0.0649735 |
| H | -0.3525276 | -1.3036648 | 1.7694065  |
| H | -0.7943146 | 0.3829192  | 2.1178965  |
| H | -2.0475626 | -0.7965728 | 1.7030225  |
| H | -1.7012356 | 1.2930342  | -1.4229285 |
| H | -2.8603536 | 0.6252332  | -0.2731155 |
| H | -1.7238476 | 1.8676442  | 0.2604715  |
| H | -0.5466336 | -2.2072558 | -0.6295575 |
| H | -2.2155646 | -1.6199758 | -0.7811715 |
| H | -0.9833736 | -1.1034278 | -1.9425455 |
| H | 0.6204514  | 2.2041352  | -0.7089015 |

### 34-radical

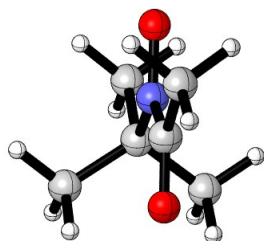

|   |            |            |            |
|---|------------|------------|------------|
| N | 0.5643089  | 0.5244160  | 0.0000361  |
| O | 0.7419569  | 1.7867910  | 0.0000331  |
| C | 1.7231719  | -0.3100560 | 0.0000791  |
| O | 1.6164319  | -1.5184840 | 0.0000121  |
| C | 3.0357389  | 0.4296630  | -0.0000179 |
| C | -1.0596301 | -0.8740240 | -1.2729399 |
| C | -0.8535591 | -0.0342290 | 0.0000071  |
| C | -1.0596581 | -0.8740690 | 1.2729201  |
| C | -1.8160731 | 1.1567030  | 0.0000161  |
| H | 3.8356169  | -0.3083840 | -0.0000829 |
| H | 3.1154829  | 1.0764570  | -0.8760519 |
| H | 3.1156089  | 1.0764370  | 0.8760211  |
| H | -0.8779261 | -0.2697170 | -2.1656959 |
| H | -0.4050281 | -1.7436230 | -1.2939219 |
| H | -2.0963441 | -1.2194700 | -1.3068989 |
| H | -0.8779831 | -0.2697890 | 2.1657011  |
| H | -2.0963701 | -1.2195240 | 1.3068401  |
| H | -0.4050491 | -1.7436630 | 1.2938901  |

|   |            |           |            |
|---|------------|-----------|------------|
| H | -1.6818171 | 1.7833800 | -0.8823109 |
| H | -2.8370331 | 0.7678410 | -0.0000089 |
| H | -1.6818461 | 1.7833440 | 0.8823721  |

### Entry 35

|   |             |             |             |
|---|-------------|-------------|-------------|
| N | -0.27294900 | 0.42105500  | -0.29271400 |
| C | -1.49708400 | -0.13336500 | -0.07550600 |
| O | -2.51020400 | 0.54202100  | 0.05381900  |
| C | 1.26820900  | -1.49507600 | -0.67299300 |
| C | 1.08289700  | -0.13725800 | 0.02367800  |
| C | 2.12252600  | 0.84292100  | -0.54798400 |
| C | 1.24127900  | -0.26280200 | 1.54811900  |
| O | -1.51602600 | -1.48591800 | -0.05764600 |
| O | -0.31232200 | 1.82527900  | -0.09959000 |
| H | 0.63593900  | -2.27228300 | -0.25115100 |
| H | 1.05521600  | -1.41355100 | -1.74134400 |
| H | 2.31130900  | -1.79844500 | -0.55589700 |
| H | 2.07157700  | 1.81651900  | -0.06376800 |
| H | 3.11901500  | 0.42504400  | -0.38804500 |
| H | 1.97437300  | 0.98300800  | -1.62099100 |
| H | 0.53245500  | -0.98710700 | 1.95719400  |
| H | 2.25098700  | -0.60121000 | 1.79528300  |
| H | 1.07631800  | 0.70312400  | 2.03029200  |
| H | -2.44651700 | -1.72903900 | 0.04467100  |
| H | -1.26857400 | 1.98897500  | 0.01820500  |

### 35-radical

|   |             |             |             |
|---|-------------|-------------|-------------|
| N | -0.28520800 | 0.53781000  | 0.00003200  |
| C | -1.45990300 | -0.25155500 | -0.00016000 |
| O | -1.45921900 | -1.46078200 | -0.00023900 |
| C | 1.25660100  | -0.95515000 | 1.27348900  |
| C | 1.09757600  | -0.10713700 | 0.00009300  |
| C | 1.25653400  | -0.95547900 | -1.27309000 |
| C | 2.12237200  | 1.03077300  | -0.00007700 |
| O | -0.39776000 | 1.80543600  | 0.00006800  |
| O | -2.56421200 | 0.50950900  | -0.00014300 |
| H | 1.10748200  | -0.34079800 | 2.16527200  |
| H | 0.55613300  | -1.78852500 | 1.29557400  |
| H | 2.27250400  | -1.35714100 | 1.30799500  |
| H | 1.10739300  | -0.34135300 | -2.16502600 |
| H | 2.27242500  | -1.35750500 | -1.30753200 |
| H | 0.55604400  | -1.78884400 | -1.29493400 |
| H | 2.02234200  | 1.66370900  | 0.88223000  |
| H | 3.12050400  | 0.58683400  | -0.00003800 |
| H | 2.02230700  | 1.66347900  | -0.88254500 |
| H | -3.31023700 | -0.10654300 | -0.00024200 |

### Entry 36

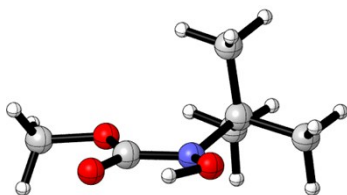

|   |            |            |            |
|---|------------|------------|------------|
| N | 0.0160743  | 0.9153355  | -0.3734451 |
| C | 1.3629273  | 0.7982365  | -0.1490651 |
| O | 2.0825703  | 1.7792085  | -0.0135321 |
| C | -0.8317637 | -1.3838975 | -0.7907031 |
| C | -1.0641847 | -0.0668465 | -0.0315421 |
| C | -1.0991987 | -0.2932745 | 1.4893249  |
| C | -2.3968607 | 0.5331655  | -0.5147691 |
| O | 1.8124233  | -0.4688255 | -0.1401791 |
| C | 3.2424653  | -0.6112715 | -0.0320211 |
| O | -0.4116667 | 2.2503175  | -0.1408741 |
| H | -1.7058417 | -2.0234725 | -0.6452761 |
| H | -0.7215687 | -1.1954365 | -1.8611731 |
| H | 0.0477683  | -1.9173735 | -0.4393871 |
| H | -1.2315107 | 0.6561305  | 2.0128739  |
| H | -1.9326637 | -0.9491615 | 1.7545749  |
| H | -0.1756867 | -0.7627585 | 1.8367859  |
| H | -2.3551377 | 0.7608625  | -1.5821511 |
| H | -3.1890917 | -0.2004445 | -0.3483711 |
| H | -2.6495457 | 1.4463135  | 0.0212409  |
| H | 3.6033623  | -0.1634675 | 0.8939979  |
| H | 3.4209573  | -1.6844055 | -0.0352371 |
| H | 3.7374173  | -0.1377925 | -0.8804391 |
| H | 0.4387543  | 2.7188585  | -0.0306331 |

### 36-radical

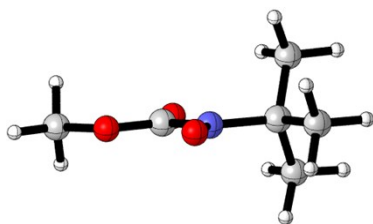

|   |            |            |            |
|---|------------|------------|------------|
| N | -0.1802109 | 0.7416611  | 0.0005888  |
| C | -1.3975289 | 0.0051011  | 0.0007128  |
| O | -1.4416189 | -1.2042739 | -0.0001022 |
| C | 1.2879361  | -0.8260849 | 1.2728248  |
| C | 1.1681421  | 0.0298321  | 0.0001628  |

|   |            |            |            |
|---|------------|------------|------------|
| C | 1.2879541  | -0.8246509 | -1.2734642 |
| C | 2.2488081  | 1.1153481  | 0.0007708  |
| O | -0.2266359 | 2.0132431  | 0.0008998  |
| O | -2.4514129 | 0.8194971  | 0.0002588  |
| C | -3.7322929 | 0.1613211  | -0.0005462 |
| H | 1.1691271  | -0.2056319 | 2.1650358  |
| H | 0.5474691  | -1.6239849 | 1.2944188  |
| H | 2.2834411  | -1.2764989 | 1.3065818  |
| H | 1.1690991  | -0.2032009 | -2.1649762 |
| H | 2.2834841  | -1.2749699 | -1.3077472 |
| H | 0.5475331  | -1.6225649 | -1.2959442 |
| H | 2.1802221  | 1.7521801  | 0.8833158  |
| H | 3.2239061  | 0.6225661  | 0.0004658  |
| H | 2.1801871  | 1.7531981  | -0.8810362 |
| H | -3.8426999 | -0.4593319 | 0.8894878  |
| H | -4.4631599 | 0.9662921  | -0.0008112 |
| H | -3.8417499 | -0.4590479 | -0.8908962 |

### Entry 37

|   |             |             |             |
|---|-------------|-------------|-------------|
| N | -0.06685200 | 0.34304200  | -0.27324200 |
| C | -1.35313400 | -0.10450900 | -0.08019500 |
| O | -2.24584300 | 0.71770600  | 0.10172200  |
| C | 2.08770600  | -0.22039900 | -1.03067400 |
| C | -1.58358500 | -1.59261600 | -0.15709100 |
| O | 0.11030700  | 1.74097100  | -0.01943900 |
| N | 1.03755900  | -0.43346400 | -0.02911000 |
| C | 1.52444700  | -0.34968300 | 1.35642100  |
| H | 2.85319500  | -0.98711000 | -0.89600500 |
| H | 1.65361500  | -0.32490600 | -2.02482700 |
| H | 2.55444100  | 0.76922500  | -0.94517200 |
| H | -0.93179600 | -2.07225600 | -0.88541700 |
| H | -1.38537600 | -2.04641700 | 0.81831700  |
| H | -2.63066800 | -1.75655400 | -0.40845900 |
| H | -0.81474200 | 2.01983100  | 0.13968100  |
| H | 1.95039500  | 0.63268500  | 1.59122900  |
| H | 0.69975400  | -0.55084400 | 2.04194400  |
| H | 2.28790800  | -1.11687600 | 1.49614300  |

### 37-radical

|   |             |             |             |
|---|-------------|-------------|-------------|
| N | 0.08053400  | -0.48110600 | -0.00001200 |
| C | 1.42806900  | 0.04663400  | -0.00001600 |
| O | 2.35534600  | -0.71877700 | 0.00003000  |
| C | -1.81166200 | 0.25924100  | -1.22183400 |
| C | 1.54486600  | 1.55023400  | -0.00004900 |
| O | -0.13167100 | -1.72380200 | 0.00000900  |
| N | -1.01377200 | 0.43691200  | -0.00001000 |



|   |             |             |             |
|---|-------------|-------------|-------------|
| C | -1.81159500 | 0.25931500  | 1.22187000  |
| H | -2.59091500 | 1.02292400  | -1.22802500 |
| H | -1.17399700 | 0.40721500  | -2.09490300 |
| H | -2.27511100 | -0.73354700 | -1.27980400 |
| H | 1.05990600  | 1.98331400  | 0.87663300  |
| H | 2.60536100  | 1.79735400  | -0.00014900 |
| H | 1.05971800  | 1.98331300  | -0.87662300 |
| H | -1.17388100 | 0.40733800  | 2.09489500  |
| H | -2.59084500 | 1.02300000  | 1.22806100  |
| H | -2.27504300 | -0.73347000 | 1.27992400  |

### Entry 38

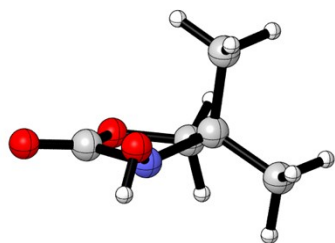

|   |            |            |            |
|---|------------|------------|------------|
| O | 1.6633912  | -1.3236671 | 0.5062461  |
| C | 0.2937032  | -1.5307841 | 0.0945981  |
| C | -0.3077438 | -0.1174231 | -0.0423249 |
| C | -0.8480738 | 0.4070159  | 1.2972541  |
| C | -1.3561218 | -0.0241181 | -1.1475909 |
| N | 0.9439062  | 0.5662399  | -0.4296609 |
| C | 2.0367392  | -0.0512081 | 0.1970391  |
| O | 3.1223812  | 0.4085779  | 0.3958191  |
| O | 0.9155822  | 1.9660699  | -0.3239079 |
| H | 0.2979372  | -2.0600731 | -0.8618649 |
| H | -0.1992718 | -2.1373641 | 0.8532101  |
| H | -1.0942848 | 1.4668569  | 1.2209261  |
| H | -1.7535148 | -0.1395961 | 1.5736391  |
| H | -0.1135978 | 0.2838359  | 2.0972661  |
| H | -2.2266108 | -0.6392011 | -0.9029199 |
| H | -1.6974958 | 1.0074999  | -1.2601089 |
| H | -0.9469428 | -0.3611261 | -2.1024499 |
| H | 1.2700182  | 2.2784639  | -1.1651689 |

### 38-radical

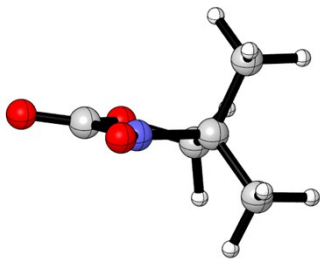

|   |            |            |            |
|---|------------|------------|------------|
| O | -1.7718674 | -1.2149422 | -0.2844696 |
| C | -0.3858094 | -1.3784882 | 0.1041004  |
| C | 0.2496666  | 0.0249468  | 0.0480294  |
| C | 0.9357926  | 0.3079648  | -1.2956746 |
| C | 1.1680686  | 0.3197378  | 1.2311484  |
| N | -0.9923544 | 0.8401768  | 0.1375544  |
| C | -2.1617344 | 0.0745138  | -0.1544606 |
| O | -3.2718184 | 0.4860728  | -0.2793336 |
| O | -1.0020014 | 2.0942438  | 0.2799864  |
| H | -0.3687694 | -1.7941672 | 1.1141444  |
| H | 0.0681816  | -2.0831182 | -0.5909496 |
| H | 1.1988406  | 1.3653108  | -1.3640946 |
| H | 1.8496386  | -0.2853462 | -1.3822276 |
| H | 0.2809326  | 0.0594638  | -2.1346056 |
| H | 2.0448426  | -0.3320172 | 1.1956624  |
| H | 1.5062736  | 1.3565838  | 1.1949044  |
| H | 0.6521176  | 0.1590638  | 2.1802854  |

### Entry 39

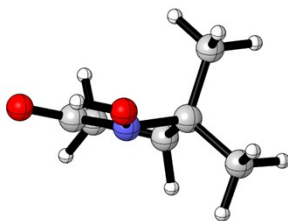

|   |            |            |            |
|---|------------|------------|------------|
| C | -1.8209677 | -0.2083145 | -0.2880720 |
| N | -0.6231157 | -0.8334685 | -0.4307040 |
| O | -2.8886037 | -0.8070155 | -0.2677799 |
| C | 0.5571164  | -0.0616325 | -0.0136099 |
| C | 0.0068793  | 1.3697525  | -0.2830600 |
| C | -1.5259417 | 1.2706865  | -0.1233539 |
| C | 0.8650034  | -0.2988335 | 1.4743791  |
| C | 1.7650424  | -0.4086675 | -0.8855479 |
| O | -0.5972387 | -2.2227396 | -0.2964590 |
| H | 0.4586393  | 2.0942285  | 0.3958351  |
| H | 0.2586843  | 1.6650355  | -1.3036860 |
| H | -1.8696897 | 1.5693565  | 0.8712791  |
| H | -2.0835317 | 1.8635455  | -0.8497900 |

|   |            |            |            |
|---|------------|------------|------------|
| H | 1.0712144  | -1.3547345 | 1.6592270  |
| H | 1.7420274  | 0.2810065  | 1.7734710  |
| H | 0.0247003  | -0.0004385 | 2.1072771  |
| H | 2.6049933  | 0.2473835  | -0.6411860 |
| H | 2.0799033  | -1.4414425 | -0.7198520 |
| H | 1.5244803  | -0.2876485 | -1.9440579 |
| H | -1.5495957 | -2.4360585 | -0.2343099 |

### 39-radical

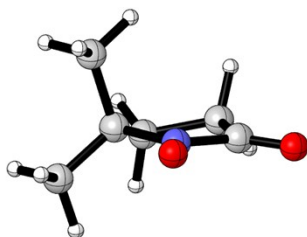

|   |            |            |            |
|---|------------|------------|------------|
| C | 1.9797449  | -0.3085751 | -0.0043882 |
| N | 0.7649909  | -1.0309751 | -0.2140882 |
| O | 3.0720699  | -0.8111221 | -0.0210072 |
| O | 0.7175399  | -2.2804821 | -0.3762672 |
| C | -0.4691471 | -0.1864711 | -0.0902562 |
| C | 0.1234089  | 1.2379959  | -0.2174492 |
| C | 1.5840879  | 1.1308379  | 0.2546408  |
| C | -1.4441221 | -0.5406601 | -1.2114042 |
| C | -1.0930871 | -0.4436821 | 1.2901468  |
| H | 0.0962139  | 1.5498449  | -1.2644932 |
| H | -0.4560331 | 1.9612319  | 0.3580608  |
| H | 2.2673209  | 1.8068659  | -0.2599712 |
| H | 1.6896789  | 1.3200489  | 1.3280718  |
| H | -1.7723231 | -1.5776211 | -1.1229152 |
| H | -2.3212101 | 0.1093109  | -1.1553072 |
| H | -0.9784711 | -0.4096361 | -2.1909982 |
| H | -2.0139781 | 0.1351949  | 1.3971228  |
| H | -1.3333201 | -1.5029561 | 1.4027048  |
| H | -0.4133651 | -0.1591511 | 2.0977978  |

### Entry 40

|   |             |             |             |
|---|-------------|-------------|-------------|
| C | -1.25878300 | 0.21790500  | -0.12945700 |
| C | -0.75452400 | 1.56451400  | 0.05520600  |
| C | 0.58681800  | 1.47199600  | 0.24002900  |
| N | -0.05931200 | -0.59709300 | -0.22989700 |
| N | 1.02845700  | 0.17280300  | 0.21861300  |
| O | -2.37097100 | -0.25439900 | -0.20463500 |
| O | -0.11238500 | -1.83140200 | 0.44341600  |

|   |             |             |             |
|---|-------------|-------------|-------------|
| C | 2.33738900  | -0.20339500 | -0.30377100 |
| H | -1.36791400 | 2.44724300  | 0.12236800  |
| H | 1.31235900  | 2.26127600  | 0.37892500  |
| H | -0.34192300 | -2.46124600 | -0.25132700 |
| H | 3.08401500  | 0.44709700  | 0.15353600  |
| H | 2.54801600  | -1.23147200 | -0.01184600 |
| H | 2.38286800  | -0.11256900 | -1.39496200 |

#### 40-radical

|   |             |             |             |
|---|-------------|-------------|-------------|
| C | -1.33008900 | 0.08249600  | -0.00006700 |
| C | -0.92629000 | 1.46503900  | -0.00007900 |
| C | 0.43479400  | 1.52683400  | 0.00018600  |
| N | -0.03587400 | -0.64952400 | 0.00007900  |
| N | 0.99606100  | 0.28094100  | 0.00011000  |
| O | -2.38610400 | -0.50556300 | -0.00033500 |
| O | 0.16475600  | -1.87552000 | 0.00005800  |
| C | 2.38658600  | -0.12750800 | 0.00007500  |
| H | -1.61203700 | 2.29448600  | -0.00025900 |
| H | 1.07981000  | 2.39290700  | 0.00024600  |
| H | 2.89477500  | 0.23842700  | 0.89501100  |
| H | 2.40214300  | -1.21668400 | 0.00006700  |
| H | 2.89477900  | 0.23843400  | -0.89485900 |

#### Entry 41

|   |             |             |             |
|---|-------------|-------------|-------------|
| C | -1.25137400 | 0.10654100  | 0.09464300  |
| N | 1.03024900  | 0.14458400  | -0.36077700 |
| O | -2.35140000 | -0.37723000 | 0.16463100  |
| C | 2.30990700  | -0.28389600 | 0.19116100  |
| H | 3.09112600  | 0.33858500  | -0.24961100 |
| H | 2.34539600  | -0.19227800 | 1.28822600  |
| H | 2.49746000  | -1.31878900 | -0.09485000 |
| C | -0.85176600 | 1.55086500  | -0.13884000 |
| H | -1.36491200 | 2.22842500  | 0.54262900  |
| H | -1.15250800 | 1.79940200  | -1.16109100 |
| C | 0.66859400  | 1.52130300  | 0.02051500  |
| H | 1.19773200  | 2.22440800  | -0.62285400 |
| H | 0.94401800  | 1.72235400  | 1.06797400  |
| N | -0.05022400 | -0.62326800 | 0.22576300  |
| O | -0.09058300 | -1.91344500 | -0.32402000 |
| H | -0.13479300 | -2.49479100 | 0.44491400  |

#### 41-radical

|   |             |             |             |
|---|-------------|-------------|-------------|
| C | -1.28603100 | -0.02164600 | 0.01668100  |
| N | -0.02743100 | -0.69073700 | -0.05884800 |
| N | 1.01934100  | 0.22918500  | -0.33938200 |
| O | -2.33644300 | -0.59349100 | 0.14789100  |

|   |             |             |             |
|---|-------------|-------------|-------------|
| O | 0.16181800  | -1.92242600 | -0.04952200 |
| C | 2.32288800  | -0.21196400 | 0.13320600  |
| H | 3.06694000  | 0.49207700  | -0.24107600 |
| H | 2.37417200  | -0.25021000 | 1.23126900  |
| H | 2.53135700  | -1.20152200 | -0.26837900 |
| C | -0.97991500 | 1.45489800  | -0.11181100 |
| H | -1.57102300 | 2.03509700  | 0.59565600  |
| H | -1.24389800 | 1.77607700  | -1.12427500 |
| C | 0.53091100  | 1.53154600  | 0.13276500  |
| H | 1.02503400  | 2.32919700  | -0.42216500 |
| H | 0.74393300  | 1.66048600  | 1.20459500  |

### Entry 42

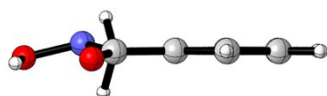

|   |            |            |            |
|---|------------|------------|------------|
| C | -1.0304143 | 1.5972776  | -0.0128013 |
| C | 0.0337747  | 0.7046026  | 0.0378917  |
| C | -0.1674633 | -0.6793104 | 0.0318627  |
| C | -1.4522353 | -1.2030564 | -0.0030903 |
| C | -2.5276593 | -0.3117594 | -0.0528033 |
| C | -2.3209543 | 1.0718996  | -0.0592003 |
| C | 1.4925197  | 0.9701126  | 0.0724807  |
| O | 2.1417747  | 1.9966986  | -0.0687903 |
| N | 2.0616937  | -0.2611384 | 0.2835997  |
| C | 1.1699167  | -1.3866474 | 0.0692207  |
| O | 3.4184417  | -0.4250684 | 0.0116527  |
| H | -0.8510123 | 2.6658646  | -0.0145273 |
| H | -1.6252733 | -2.2737084 | -0.0003963 |
| H | -3.5395163 | -0.6993024 | -0.0891863 |
| H | -3.1741823 | 1.7391506  | -0.0988583 |
| H | 1.2494017  | -2.1185474 | 0.8782537  |
| H | 1.4048087  | -1.8847394 | -0.8793183 |
| H | 3.7163787  | 0.4976726  | -0.1059903 |

### 42-radical

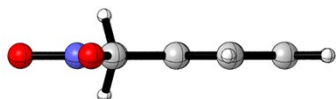

|   |            |            |            |
|---|------------|------------|------------|
| C | -0.8313224 | 1.6114577  | -0.0000681 |
| C | 0.2503066  | 0.7333827  | -0.0000051 |
| C | 0.0686226  | -0.6523433 | -0.0000041 |
| C | -1.2114064 | -1.1918643 | -0.0000801 |
| C | -2.2995644 | -0.3168443 | -0.0001491 |
| C | -2.1136334 | 1.0711237  | -0.0001411 |
| C | 1.6887416  | 1.0643967  | 0.0000429  |

|   |            |            |            |
|---|------------|------------|------------|
| O | 2.2594666  | 2.1240047  | 0.0001399  |
| N | 2.3516276  | -0.2169573 | 0.0001649  |
| O | 3.5999626  | -0.3739673 | 0.0002859  |
| C | 1.4022296  | -1.3499193 | 0.0001039  |
| H | -0.6638854 | 2.6819997  | -0.0000691 |
| H | -1.3693694 | -2.2646863 | -0.0000801 |
| H | -3.3063054 | -0.7189703 | -0.0002081 |
| H | -2.9769144 | 1.7262157  | -0.0001961 |
| H | 1.5757956  | -1.9635323 | -0.8883931 |
| H | 1.5756486  | -1.9634963 | 0.8886569  |

### Entry 43

|   |             |             |             |
|---|-------------|-------------|-------------|
| C | 0.26249100  | 0.46032900  | 0.00000500  |
| C | 0.53103500  | -0.91888700 | 0.00000800  |
| C | 1.84498800  | -1.34967500 | -0.00000100 |
| C | 2.87500500  | -0.39699200 | 0.00000500  |
| C | 2.58063200  | 0.96498400  | 0.00000100  |
| C | 1.25777200  | 1.42320600  | -0.00000700 |
| C | -1.83075700 | -0.55628800 | 0.00008000  |
| N | -1.12358300 | 0.61319200  | -0.00001500 |
| O | -1.75174000 | 1.84236000  | -0.00001100 |
| O | -3.05027500 | -0.59987600 | -0.00002300 |
| C | -0.78291200 | -1.66927800 | -0.00001900 |
| H | 2.07946200  | -2.40863700 | -0.00000900 |
| H | 3.90775400  | -0.72423800 | 0.00000500  |
| H | 3.38852800  | 1.68753200  | 0.00000000  |
| H | 1.01801100  | 2.47830800  | -0.00001400 |
| H | -2.69532400 | 1.59172200  | 0.00007900  |
| H | -0.92339000 | -2.30059800 | -0.88177500 |
| H | -0.92337400 | -2.30069500 | 0.88166800  |

### 43-radical

|   |             |             |             |
|---|-------------|-------------|-------------|
| C | -0.24300800 | 0.47784900  | -0.00005600 |
| C | -0.44619900 | -0.90579700 | -0.00008800 |
| C | -1.74203200 | -1.39841200 | -0.00005100 |
| C | -2.80850900 | -0.49194900 | -0.00003100 |
| C | -2.57926400 | 0.88821600  | 0.00000300  |
| C | -1.28284400 | 1.39926000  | 0.00001500  |
| C | 1.90507100  | -0.47479600 | -0.00045400 |
| N | 1.14120500  | 0.75860200  | -0.00000400 |
| O | 1.65283200  | 1.91078800  | 0.00024300  |
| O | 3.10131100  | -0.51641400 | 0.00023600  |
| C | 0.88651600  | -1.60958200 | -0.00002100 |
| H | -1.92999800 | -2.46633300 | -0.00003600 |
| H | -3.82620000 | -0.86419100 | -0.00001400 |
| H | -3.42146000 | 1.57022800  | 0.00004500  |

|   |             |             |             |
|---|-------------|-------------|-------------|
| H | -1.07673000 | 2.46183100  | 0.00006600  |
| H | 1.04726500  | -2.23754100 | 0.88115100  |
| H | 1.04714700  | -2.23794500 | -0.88092200 |

#### Entry 44

|   |             |             |             |
|---|-------------|-------------|-------------|
| C | -1.40238100 | 0.28273700  | -0.08980900 |
| N | -0.31519800 | -0.52430200 | -0.31231400 |
| O | -2.54721500 | -0.13721100 | 0.01103700  |
| C | 0.96529700  | 0.12165600  | 0.00707300  |
| C | 1.51301700  | -0.36919100 | 1.36027200  |
| C | 1.98376800  | -0.09438300 | -1.12240700 |
| C | -0.83804100 | 1.65095400  | 0.02736100  |
| C | 0.49396500  | 1.56192800  | 0.09106900  |
| O | -0.46141100 | -1.89550100 | -0.08770400 |
| H | 1.73841300  | -1.43569300 | 1.30537900  |
| H | 2.42933000  | 0.17022700  | 1.61084300  |
| H | 0.78470200  | -0.20861000 | 2.15736600  |
| H | 2.90921200  | 0.44721100  | -0.90997400 |
| H | 2.22123900  | -1.15656400 | -1.21379700 |
| H | 1.58155000  | 0.25425800  | -2.07530000 |
| H | -1.45482100 | 2.53655400  | 0.07299800  |
| H | 1.19864700  | 2.37985300  | 0.17176200  |
| H | -1.42662300 | -1.97762200 | 0.03891000  |

#### 44-radical

|   |             |             |             |
|---|-------------|-------------|-------------|
| C | 1.48799400  | 0.12850100  | 0.00051600  |
| N | 0.28905400  | -0.66726400 | -0.00003600 |
| O | 2.60651800  | -0.31782200 | -0.00012800 |
| O | 0.26231900  | -1.92547400 | -0.00035700 |
| C | -0.94645000 | 0.17316600  | 0.00006500  |
| C | -1.76150700 | -0.11185700 | -1.27002000 |
| C | -1.76126800 | -0.11176900 | 1.27031700  |
| C | 1.00011300  | 1.52285100  | -0.00017700 |
| C | -0.33620700 | 1.55320500  | -0.00005500 |
| H | -2.06832000 | -1.15953400 | -1.28078000 |
| H | -2.65629500 | 0.51488700  | -1.29116300 |
| H | -1.17303900 | 0.08922200  | -2.16743400 |
| H | -2.65606300 | 0.51495900  | 1.29156500  |
| H | -2.06805200 | -1.15945200 | 1.28121400  |
| H | -1.17264100 | 0.08939400  | 2.16760700  |
| H | 1.68080000  | 2.36187700  | -0.00050000 |
| H | -0.95651000 | 2.44128100  | -0.00024900 |

#### Entry 45

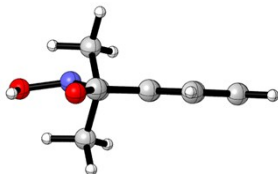

|   |            |            |            |
|---|------------|------------|------------|
| C | 1.9243490  | 1.7917832  | -0.0497230 |
| C | 0.6660880  | 1.2027462  | -0.0835500 |
| C | 0.4991220  | -0.1844888 | -0.0324910 |
| C | 1.6070980  | -1.0179818 | 0.0381060  |
| C | 2.8772730  | -0.4345978 | 0.0710310  |
| C | 3.0362780  | 0.9540462  | 0.0291070  |
| C | -0.6711250 | 1.8383972  | -0.1530670 |
| O | -1.0285190 | 3.0085182  | -0.0824300 |
| N | -1.5348480 | 0.7923402  | -0.3050370 |
| C | -0.9821420 | -0.5481158 | -0.0527940 |
| C | -1.4576040 | -1.0864398 | 1.3093030  |
| C | -1.3531140 | -1.5051248 | -1.1949220 |
| H | 2.0259320  | 2.8700442  | -0.0850450 |
| H | 1.5025540  | -2.0967818 | 0.0740940  |
| H | 3.7536770  | -1.0699998 | 0.1324190  |
| H | 4.0327830  | 1.3794622  | 0.0571310  |
| H | -2.5422550 | -1.2092078 | 1.3069830  |
| H | -0.9965460 | -2.0563158 | 1.5085790  |
| H | -1.1858990 | -0.4014408 | 2.1148750  |
| H | -0.8932370 | -2.4834758 | -1.0365690 |
| H | -2.4363650 | -1.6390858 | -1.2356730 |
| H | -1.0139690 | -1.1094958 | -2.1538130 |
| O | -2.8975080 | 1.0162902  | -0.1322600 |
| H | -2.9320220 | 1.9889252  | -0.0442530 |

#### 45-radical

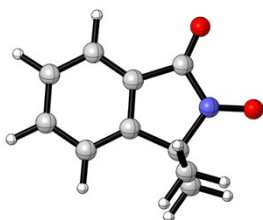

|   |            |            |            |
|---|------------|------------|------------|
| C | -1.4170211 | 2.1322777  | -0.4461753 |
| C | -0.2841881 | 1.3459007  | -0.2456973 |
| C | -0.3739121 | -0.0291043 | -0.0168803 |
| C | -1.6178111 | -0.6486223 | 0.0155737  |
| C | -2.7578761 | 0.1325017  | -0.1843813 |
| C | -2.6612311 | 1.5105027  | -0.4133663 |
| C | 1.1250389  | 1.7781307  | -0.2363343 |
| O | 1.6223889  | 2.8645207  | -0.3927003 |



|   |            |            |            |
|---|------------|------------|------------|
| N | 1.8667759  | 0.5710957  | 0.0120907  |
| O | 3.1203689  | 0.5172357  | 0.0942977  |
| C | 0.9985709  | -0.6456633 | 0.1685417  |
| C | 1.3574659  | -1.6581823 | -0.9280993 |
| C | 1.2111209  | -1.2324483 | 1.5710817  |
| H | -1.3161141 | 3.1968937  | -0.6214903 |
| H | -1.7122891 | -1.7143763 | 0.1914587  |
| H | -3.7353211 | -0.3361813 | -0.1619853 |
| H | -3.5625651 | 2.0926887  | -0.5654243 |
| H | 2.4030539  | -1.9556773 | -0.8278583 |
| H | 0.7303389  | -2.5478573 | -0.8362733 |
| H | 1.2080799  | -1.2297443 | -1.9211963 |
| H | 0.5813989  | -2.1145423 | 1.7074637  |
| H | 2.2553899  | -1.5260733 | 1.6939237  |
| H | 0.9583369  | -0.5032743 | 2.3434307  |

#### Entry 46

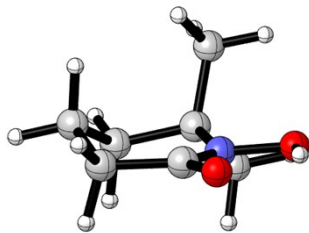

|   |            |            |            |
|---|------------|------------|------------|
| C | -2.0916092 | 0.6916095  | -0.3491544 |
| C | -1.7005792 | -0.7674365 | -0.2454274 |
| C | 0.7848958  | -0.1723015 | 0.0140366  |
| C | 0.3532528  | 1.2618615  | -0.3587664 |
| C | -1.0218992 | 1.6438015  | 0.1927106  |
| N | -0.3746512 | -1.0533535 | -0.2307944 |
| O | -2.5207942 | -1.6905285 | -0.2201354 |
| C | 1.9414498  | -0.6173415 | -0.8959454 |
| C | 1.2065938  | -0.2776365 | 1.4924116  |
| O | -0.0815552 | -2.4167475 | -0.0678524 |
| H | -2.2873522 | 0.8965905  | -1.4083154 |
| H | -3.0451502 | 0.7995295  | 0.1708996  |
| H | 1.1234218  | 1.9477455  | 0.0044336  |
| H | 0.3377038  | 1.3503575  | -1.4508214 |
| H | -1.0161302 | 1.6108225  | 1.2866816  |
| H | -1.2632002 | 2.6737955  | -0.0838424 |
| H | 2.7843388  | 0.0685185  | -0.7772324 |
| H | 2.2755268  | -1.6239165 | -0.6432014 |
| H | 1.6320718  | -0.6101445 | -1.9436204 |
| H | 1.4255038  | -1.3148815 | 1.7489956  |
| H | 2.1052908  | 0.3192325  | 1.6683446  |
| H | 0.4197418  | 0.0779705  | 2.1610856  |

H -0.9868702 -2.7975475 -0.0644904

#### 46-radical

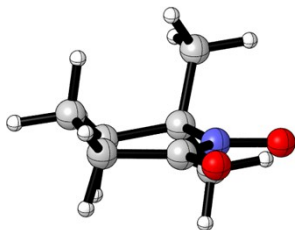

|   |            |            |            |
|---|------------|------------|------------|
| C | -2.1217260 | 0.6043200  | -0.3395563 |
| C | -1.8320190 | -0.8711240 | -0.1416833 |
| C | 0.7381800  | -0.3158460 | 0.0255507  |
| C | 0.3186070  | 1.0884550  | -0.4450483 |
| C | -1.0163150 | 1.5443390  | 0.1379687  |
| N | -0.4478500 | -1.2588090 | -0.0217593 |
| O | -0.1955400 | -2.4896980 | 0.1539827  |
| O | -2.6938390 | -1.7124030 | -0.1059793 |
| C | 1.8184590  | -0.8807100 | -0.9069883 |
| C | 1.2448360  | -0.3029320 | 1.4785497  |
| H | -2.2891200 | 0.7423190  | -1.4153973 |
| H | -3.0793680 | 0.7985760  | 0.1474587  |
| H | 1.1218840  | 1.7819580  | -0.1807613 |
| H | 0.2485600  | 1.0938370  | -1.5391003 |
| H | -0.9768770 | 1.5578630  | 1.2316597  |
| H | -1.2389640 | 2.5675150  | -0.1764673 |
| H | 2.6812260  | -0.2095480 | -0.9084803 |
| H | 2.1415320  | -1.8676160 | -0.5774323 |
| H | 1.4448990  | -0.9628590 | -1.9307243 |
| H | 1.4656410  | -1.3204880 | 1.8042467  |
| H | 2.1599880  | 0.2907090  | 1.5464207  |
| H | 0.5078050  | 0.1221430  | 2.1635407  |

#### Entry 47

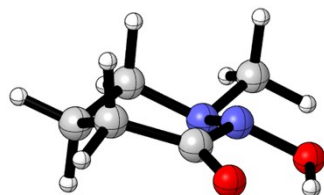

|   |            |            |            |
|---|------------|------------|------------|
| C | -0.6806333 | 1.6029602  | -0.4192104 |
| C | 0.6846117  | 1.0997882  | 0.0278986  |
| C | -1.4944093 | -0.7210628 | 0.0695516  |
| C | -1.7771563 | 0.7538472  | 0.2316766  |
| N | -0.1731563 | -1.1119358 | 0.1423646  |
| O | -2.3603303 | -1.5802448 | -0.0728464 |
| N | 0.8980657  | -0.2934108 | -0.3872334 |

|   |            |            |            |
|---|------------|------------|------------|
| H | -0.7972843 | 2.6541852  | -0.1444014 |
| H | -0.7509363 | 1.5374962  | -1.5088854 |
| H | 1.4864007  | 1.6765532  | -0.4369724 |
| H | 0.7850767  | 1.2042392  | 1.1223536  |
| H | -2.7619323 | 0.9372162  | -0.1994384 |
| H | -1.8471603 | 0.9710102  | 1.3031506  |
| C | 2.1706407  | -0.7975488 | 0.1457076  |
| H | 2.3158997  | -1.8269968 | -0.1719484 |
| H | 2.9655037  | -0.1832318 | -0.2799074 |
| H | 2.2133217  | -0.7441518 | 1.2437746  |
| O | 0.0232897  | -2.4427248 | -0.2542124 |
| H | -0.8998113 | -2.7359878 | -0.4114224 |

#### 47-radical

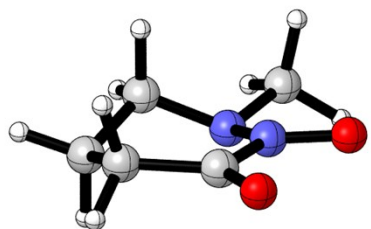

|   |            |            |            |
|---|------------|------------|------------|
| C | -0.8328680 | 1.4311304  | -0.3123000 |
| C | 0.5066760  | 0.9870204  | 0.2551390  |
| C | -1.4947390 | -1.0437406 | -0.0522560 |
| C | -1.9109690 | 0.4111774  | 0.0514260  |
| N | -0.0800470 | -1.3331736 | -0.0551780 |
| O | -2.2770560 | -1.9603606 | -0.0463400 |
| O | 0.3197520  | -2.5214556 | -0.0343920 |
| N | 0.8738140  | -0.3054836 | -0.3304260 |
| H | -1.1000510 | 2.4168694  | 0.0769790  |
| H | -0.7402160 | 1.5192184  | -1.3982380 |
| H | 1.2968060  | 1.6879764  | -0.0185940 |
| H | 0.4725390  | 0.9323944  | 1.3559920  |
| H | -2.8110990 | 0.5249344  | -0.5557730 |
| H | -2.2261550 | 0.5479124  | 1.0933070  |
| C | 2.2383920  | -0.7472306 | -0.0516240 |
| H | 2.4653290  | -1.6366916 | -0.6331290 |
| H | 2.9016900  | 0.0623424  | -0.3564710 |
| H | 2.3982020  | -0.9728396 | 1.0118780  |

#### Entry 48

|   |             |             |             |
|---|-------------|-------------|-------------|
| N | 0.00237700  | -0.31539100 | -0.00002200 |
| C | 1.26249100  | 0.30759500  | 0.00003500  |
| O | 1.42633000  | 1.49766100  | 0.00011700  |
| C | -1.21330400 | 0.36410700  | -0.00012200 |

|   |             |             |             |
|---|-------------|-------------|-------------|
| O | -1.36887500 | 1.55175100  | -0.00025800 |
| O | 2.22555700  | -0.62097600 | 0.00002600  |
| O | -2.21132600 | -0.56691500 | 0.00012200  |
| C | 3.56769200  | -0.09747200 | 0.00009100  |
| C | -3.57115600 | -0.08147400 | 0.00016400  |
| O | 0.00914700  | -1.72616000 | -0.00037500 |
| H | 3.74010400  | 0.50832900  | -0.89001800 |
| H | 3.74005800  | 0.50823000  | 0.89027700  |
| H | 4.21143900  | -0.97370100 | 0.00005800  |
| H | -4.05893900 | -0.46723300 | 0.89475900  |
| H | -3.57420200 | 1.00648900  | -0.00048700 |
| H | -4.05932800 | -0.46833000 | -0.89374000 |
| H | -0.93676200 | -1.94547700 | 0.00123400  |

#### 48-radical

|   |             |             |             |
|---|-------------|-------------|-------------|
| N | -0.00005500 | 0.50728400  | 0.00044100  |
| O | -0.00001200 | 1.77929000  | 0.00093100  |
| C | -1.24127400 | -0.23186300 | -0.14764700 |
| O | -1.28926000 | -1.33385500 | -0.61437200 |
| C | 1.24137100  | -0.23183200 | 0.14802300  |
| O | 1.28974600  | -1.33342300 | 0.61566200  |
| O | -2.25249900 | 0.51644100  | 0.26693700  |
| O | 2.25211800  | 0.51620900  | -0.26799300 |
| C | -3.56226200 | -0.06490500 | 0.08736800  |
| C | 3.56214600  | -0.06472700 | -0.08895400 |
| H | -3.74328800 | -0.26193700 | -0.96954000 |
| H | -3.64179900 | -0.99339600 | 0.65305500  |
| H | -4.25621900 | 0.68076100  | 0.46596500  |
| H | 4.25567900  | 0.68093600  | -0.46832000 |
| H | 3.74382400  | -0.26122300 | 0.96794000  |
| H | 3.64156300  | -0.99346500 | -0.65425200 |

#### Entry 49

|   |             |             |             |
|---|-------------|-------------|-------------|
| N | -0.00004100 | 0.49295700  | 0.09327500  |
| C | -1.27026700 | 1.06962300  | -0.19945700 |
| O | -1.36905500 | 2.21663900  | -0.55857700 |
| C | 1.26994400  | 1.06872700  | -0.20186600 |
| O | 1.36848500  | 2.21459700  | -0.56472300 |
| C | 2.47858600  | 0.18892800  | -0.03871000 |
| C | 2.53460400  | -1.14910500 | -0.44706700 |
| C | 3.64027100  | 0.81304300  | 0.43190700  |
| C | 3.73594700  | -1.84879600 | -0.37891400 |
| C | 4.83200200  | 0.10159700  | 0.52671500  |
| C | 4.88273000  | -1.23039500 | 0.11809300  |
| C | -2.47869500 | 0.18931300  | -0.03790900 |

|   |             |             |             |
|---|-------------|-------------|-------------|
| C | -3.64052200 | 0.81215000  | 0.43403200  |
| C | -2.53431800 | -1.14793800 | -0.44886600 |
| C | -4.83203300 | 0.10016100  | 0.52748900  |
| C | -3.73542700 | -1.84814000 | -0.38201000 |
| C | -4.88237200 | -1.23104700 | 0.11626200  |
| O | 0.00001800  | -0.74706200 | 0.75055200  |
| H | 1.64877400  | -1.64043900 | -0.82563800 |
| H | 3.59754400  | 1.85867200  | 0.71151300  |
| H | 3.77588700  | -2.87937000 | -0.71279200 |
| H | 5.72228800  | 0.58948800  | 0.90655200  |
| H | 5.81354200  | -1.78293900 | 0.17993800  |
| H | -3.59806700 | 1.85723200  | 0.71571400  |
| H | -1.64834500 | -1.63823700 | -0.82845800 |
| H | -5.72245300 | 0.58702600  | 0.90832800  |
| H | -3.77507200 | -2.87807600 | -0.71788000 |
| H | -5.81301300 | -1.78399200 | 0.17708000  |
| H | 0.00091700  | -0.54217900 | 1.69650600  |

#### 49-radical

|   |             |             |             |
|---|-------------|-------------|-------------|
| N | 0.00000000  | -0.00572800 | -0.00007900 |
| O | -0.00000200 | -1.28173500 | -0.00022700 |
| C | -1.17855500 | 0.73512400  | 0.46743500  |
| O | -0.99513200 | 1.75106100  | 1.08713900  |
| C | 1.17858700  | 0.73520500  | -0.46741400 |
| O | 0.99520200  | 1.75123500  | -1.08697100 |
| C | 2.50648000  | 0.14612600  | -0.17061900 |
| C | 3.58703000  | 0.59444900  | -0.94393300 |
| C | 2.73199500  | -0.75272300 | 0.88076400  |
| C | 4.87190600  | 0.13696500  | -0.68129600 |
| C | 4.02349200  | -1.19417800 | 1.14956600  |
| C | 5.09189100  | -0.75698000 | 0.36764300  |
| C | -2.50647200 | 0.14610300  | 0.17062600  |
| C | -3.58695600 | 0.59427100  | 0.94412100  |
| C | -2.73207900 | -0.75252800 | -0.88092400 |
| C | -4.87185700 | 0.13684600  | 0.68149800  |
| C | -4.02360000 | -1.19392100 | -1.14971000 |
| C | -5.09193200 | -0.75688100 | -0.36760700 |
| H | 3.40040300  | 1.30129500  | -1.74291400 |
| H | 1.90800700  | -1.10332900 | 1.48655100  |
| H | 5.70202900  | 0.47941800  | -1.28808400 |
| H | 4.19540200  | -1.88275200 | 1.96855600  |
| H | 6.09537000  | -1.11062300 | 0.57639000  |
| H | -3.40026100 | 1.30095400  | 1.74323100  |
| H | -1.90814400 | -1.10301000 | -1.48685300 |
| H | -5.70192700 | 0.47917700  | 1.28842600  |

|   |             |             |             |
|---|-------------|-------------|-------------|
| H | -4.19558100 | -1.88232300 | -1.96882900 |
| H | -6.09543100 | -1.11047800 | -0.57634400 |

### Entry 50

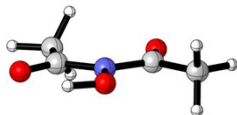

|   |            |            |            |
|---|------------|------------|------------|
| N | -0.1096728 | -0.4966855 | -0.0002949 |
| C | 1.0267092  | 0.3308435  | 0.0002791  |
| O | 0.9136462  | 1.5375425  | 0.0008891  |
| C | -1.4702718 | -0.1673175 | -0.0003869 |
| O | -2.2604838 | -1.1004405 | -0.0007259 |
| C | 2.3427442  | -0.4015005 | 0.0002111  |
| C | -1.8813378 | 1.2754615  | 0.0002851  |
| H | 3.1406242  | 0.3382435  | 0.0007251  |
| H | 2.4283412  | -1.0481395 | 0.8760821  |
| H | 2.4287052  | -1.0473205 | -0.8762269 |
| H | -1.4892988 | 1.7986415  | 0.8733841  |
| H | -1.4892248 | 1.7994605  | -0.8722879 |
| H | -2.9698948 | 1.3031865  | 0.0002531  |
| O | 0.1480012  | -1.8733945 | -0.0008939 |
| H | -0.7585868 | -2.2485815 | -0.0012919 |

### 50-radical

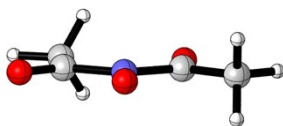

|   |            |            |            |
|---|------------|------------|------------|
| N | -0.1451026 | -0.7502043 | 0.0000989  |
| O | 0.1111354  | -1.9960663 | 0.0000469  |
| C | 0.9831524  | 0.1650707  | 0.0001909  |
| O | 0.8117854  | 1.3579387  | 0.0002089  |
| C | -1.5921416 | -0.3697473 | 0.0000669  |
| O | -2.3796346 | -1.2680803 | 0.0001509  |
| C | 2.3240424  | -0.5159493 | -0.0000511 |
| C | -1.9510426 | 1.0883987  | -0.0000781 |
| H | 3.0927704  | 0.2542007  | -0.0001871 |
| H | 2.4353664  | -1.1591883 | 0.8750169  |
| H | 2.4350704  | -1.1592213 | -0.8751301 |
| H | -1.5436896 | 1.5995287  | 0.8730299  |
| H | -1.5434856 | 1.5994177  | -0.8731571 |
| H | -3.0382256 | 1.1539017  | -0.0002071 |

### Entry 51

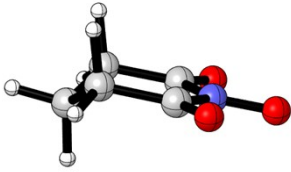

|   |            |            |            |
|---|------------|------------|------------|
| C | -0.0095606 | 1.4196446  | -0.4685283 |
| C | 1.2793504  | 0.8456526  | 0.1204457  |
| C | 1.3648654  | -0.6687754 | 0.0395067  |
| C | -1.1558836 | -0.7597954 | 0.1055357  |
| C | -1.2290646 | 0.7470356  | 0.1617917  |
| N | 0.1148554  | -1.3174634 | 0.0363767  |
| O | 2.3950714  | -1.2904424 | 0.0014037  |
| O | -2.1218466 | -1.5049584 | 0.1293927  |
| O | 0.1638354  | -2.7032704 | -0.0102953 |
| H | -0.0502746 | 2.4994016  | -0.3055823 |
| H | -0.0221986 | 1.2649256  | -1.5524883 |
| H | 2.1703204  | 1.2341346  | -0.3750483 |
| H | 1.3692104  | 1.1159176  | 1.1804487  |
| H | -2.1644826 | 1.0386966  | -0.3188903 |
| H | -1.3215536 | 1.0270856  | 1.2189007  |
| H | -0.7826436 | -2.9477884 | 0.0370307  |

### 51-radical

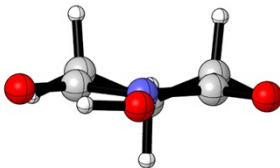

|   |            |            |            |
|---|------------|------------|------------|
| C | 0.0001671  | 1.2245587  | -0.4264070 |
| C | 1.2527831  | 0.5929607  | 0.1779190  |
| C | 1.3019671  | -0.9117013 | 0.0319120  |
| C | -1.3018359 | -0.9119453 | 0.0302520  |
| C | -1.2531259 | 0.5927317  | 0.1762760  |
| N | 0.0001671  | -1.5917653 | -0.0272640 |
| O | 2.3033981  | -1.5635113 | -0.0224310 |
| O | -2.3030729 | -1.5639343 | -0.0254760 |
| O | 0.0003551  | -2.8530063 | -0.1370970 |
| H | -0.0000529 | 2.3013777  | -0.2413190 |
| H | 0.0008931  | 1.0944897  | -1.5137200 |
| H | 2.1726481  | 0.9823187  | -0.2616560 |
| H | 1.3057701  | 0.8128667  | 1.2526280  |
| H | -2.1724829 | 0.9819047  | -0.2645250 |
| H | -1.3075789 | 0.8126547  | 1.2509080  |

### Entry 52

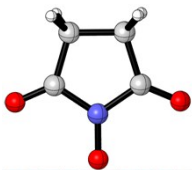

|   |            |            |            |
|---|------------|------------|------------|
| C | 1.2703768  | -0.3543173 | -0.0013187 |
| C | -1.0918632 | -0.3541833 | -0.0159487 |
| N | 0.0801518  | -1.0820773 | -0.0274307 |
| O | 0.0503288  | -2.4554943 | -0.0631597 |
| O | 2.3793098  | -0.8155723 | -0.0067157 |
| O | -2.1835672 | -0.8830653 | -0.0363067 |
| C | 0.8404098  | 1.1105927  | 0.0344263  |
| C | -0.7026292 | 1.1090917  | 0.0239393  |
| H | -0.9078112 | -2.6447653 | -0.0741917 |
| H | 1.2743788  | 1.6182037  | -0.8287427 |
| H | 1.2622428  | 1.5714757  | 0.9292743  |
| H | -1.1417322 | 1.5678527  | 0.9120003  |
| H | -1.1295962 | 1.6122587  | -0.8458257 |

### 52-radical

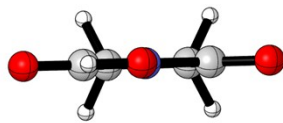

|   |            |            |            |
|---|------------|------------|------------|
| C | 1.2049706  | -0.5731752 | 0.0000970  |
| C | -1.2050164 | -0.5730782 | -0.0002460 |
| N | -0.0000554 | -1.3763562 | -0.0000940 |
| O | -0.0001054 | -2.6367462 | -0.0001420 |
| O | 2.3058476  | -1.0378592 | 0.0004980  |
| O | -2.3059304 | -1.0376742 | -0.0006220 |
| C | 0.7704266  | 0.8784088  | 0.0001230  |
| C | -0.7703564 | 0.8784708  | -0.0000120 |
| H | 1.1990256  | 1.3694498  | -0.8762920 |
| H | 1.1989096  | 1.3694588  | 0.8765860  |
| H | -1.1989134 | 1.3693918  | 0.8764910  |
| H | -1.1988024 | 1.3697088  | -0.8763870 |

### Entry 53

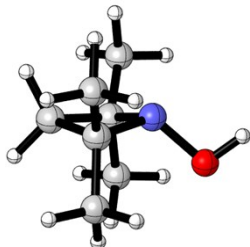

|   |            |           |            |
|---|------------|-----------|------------|
| C | -1.0889021 | 0.1296622 | -0.0664104 |
| C | -0.0000061 | 0.5914112 | -1.0789874 |



|   |            |            |            |
|---|------------|------------|------------|
| C | 1.0889009  | 0.1296642  | -0.0664204 |
| N | 0.0000049  | 0.0320872  | 0.9680846  |
| C | 2.1322089  | 1.1731052  | 0.3273506  |
| C | 1.7646589  | -1.1922648 | -0.4351794 |
| C | -2.1322081 | 1.1731002  | 0.3273716  |
| C | -1.7646601 | -1.1922688 | -0.4351614 |
| H | -0.0000081 | 1.6681022  | -1.2581204 |
| H | -0.0000101 | 0.0672592  | -2.0360084 |
| H | 2.7171419  | 0.8259362  | 1.1849486  |
| H | 2.8247369  | 1.3627372  | -0.4992024 |
| H | 1.6529669  | 2.1149172  | 0.6028226  |
| H | 2.4375849  | -1.0271918 | -1.2821934 |
| H | 2.3540319  | -1.5715298 | 0.4024566  |
| H | 1.0502809  | -1.9663918 | -0.7143394 |
| H | -2.7171321 | 0.8259302  | 1.1849756  |
| H | -1.6529651 | 2.1149142  | 0.6028396  |
| H | -2.8247441 | 1.3627312  | -0.4991744 |
| H | -2.4375961 | -1.0271978 | -1.2821684 |
| H | -1.0502841 | -1.9663938 | -0.7143294 |
| H | -2.3540251 | -1.5715358 | 0.4024806  |
| O | 0.0000099  | -1.1837228 | 1.7266796  |
| H | 0.0000139  | -0.8730598 | 2.6376856  |

### 53-radical

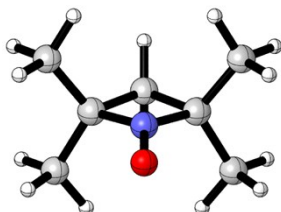

|   |            |            |            |
|---|------------|------------|------------|
| C | -1.1101300 | 0.0425438  | 0.0059278  |
| C | 0.0000000  | 0.4789528  | -1.0031792 |
| C | 1.1101300  | 0.0425438  | 0.0059278  |
| N | 0.0000000  | -0.2523192 | 0.9676548  |
| O | 0.0000000  | -1.0180742 | 1.9728978  |
| C | 2.0382950  | 1.1468908  | 0.5085838  |
| C | 1.8921080  | -1.2127872 | -0.3804452 |
| C | -2.0382950 | 1.1468908  | 0.5085838  |
| C | -1.8921080 | -1.2127872 | -0.3804452 |
| H | 0.0000000  | 1.5472358  | -1.2241202 |
| H | 0.0000000  | -0.0841822 | -1.9369442 |
| H | 2.5955240  | 0.8035358  | 1.3842568  |
| H | 2.7576130  | 1.4222518  | -0.2685092 |
| H | 1.4753400  | 2.0395808  | 0.7903718  |
| H | 2.6139340  | -0.9759002 | -1.1674652 |
| H | 2.4370500  | -1.5998012 | 0.4836868  |

|   |            |            |            |
|---|------------|------------|------------|
| H | 1.2313880  | -2.0021212 | -0.7445612 |
| H | -2.5955240 | 0.8035358  | 1.3842568  |
| H | -1.4753400 | 2.0395808  | 0.7903718  |
| H | -2.7576140 | 1.4222518  | -0.2685092 |
| H | -2.6139330 | -0.9759002 | -1.1674662 |
| H | -1.2313880 | -2.0021212 | -0.7445612 |
| H | -2.4370500 | -1.5998012 | 0.4836868  |

#### Entry 54

|   |             |             |             |
|---|-------------|-------------|-------------|
| N | -0.01699600 | 0.49050200  | 0.38285700  |
| C | 1.31250400  | -0.12227400 | 0.03534600  |
| C | -1.31289200 | -0.13887500 | 0.04259100  |
| F | -1.37577900 | -1.29993100 | 0.84729200  |
| C | -1.52358600 | -0.58834000 | -1.40107100 |
| C | 2.34795600  | 0.68224900  | 0.84812600  |
| C | 1.68459500  | -0.03447500 | -1.46075300 |
| C | -2.45003900 | 0.75882300  | 0.52147900  |
| C | 1.36425600  | -1.58266700 | 0.51241500  |
| H | -2.55572700 | -0.91974500 | -1.53443900 |
| H | -1.33391000 | 0.24475900  | -2.08033600 |
| H | -0.86632500 | -1.41727200 | -1.65805600 |
| H | 2.09808100  | 0.65786500  | 1.91151000  |
| H | 3.34344200  | 0.25078000  | 0.71620000  |
| H | 2.38894300  | 1.72229700  | 0.51909700  |
| H | 1.09707600  | -0.71273600 | -2.07950400 |
| H | 1.55297600  | 0.98186400  | -1.83379700 |
| H | 2.73611100  | -0.30786200 | -1.58539400 |
| H | -3.37236900 | 0.17500900  | 0.51425700  |
| H | -2.25668900 | 1.09346800  | 1.54218500  |
| H | -2.57438800 | 1.62348500  | -0.12934600 |
| H | 0.70610700  | -2.23777900 | -0.05796700 |
| H | 2.38805200  | -1.94596600 | 0.38977600  |
| H | 1.09088900  | -1.66474000 | 1.56529400  |
| O | -0.05128200 | 1.81003800  | -0.20653100 |
| H | -0.06779500 | 2.39548600  | 0.55834200  |

#### 54-radical

|   |             |             |             |
|---|-------------|-------------|-------------|
| N | -0.01321700 | -0.57162100 | -0.00020700 |
| C | 1.34105400  | 0.10262300  | -0.00004200 |
| C | -1.34052900 | 0.11033600  | -0.00003100 |
| F | -1.11053800 | 1.49826100  | -0.00086800 |
| C | -2.09895800 | -0.22555100 | 1.27561000  |
| C | 2.39705400  | -1.00936800 | -0.00016900 |

|   |             |             |             |
|---|-------------|-------------|-------------|
| C | 1.50233500  | 0.95686600  | 1.27228500  |
| C | -2.09985400 | -0.22689700 | -1.27477500 |
| O | -0.09866900 | -1.84889000 | 0.00022100  |
| C | 1.50238900  | 0.95718500  | -1.27214700 |
| H | -3.07422000 | 0.26484300  | 1.26249000  |
| H | -2.23517400 | -1.30459000 | 1.34509100  |
| H | -1.53875800 | 0.11831200  | 2.14657600  |
| H | 2.30946300  | -1.64499600 | -0.88150500 |
| H | 3.38498400  | -0.54178900 | -0.00014100 |
| H | 2.30949100  | -1.64518300 | 0.88103200  |
| H | 0.78840200  | 1.77846000  | 1.30872600  |
| H | 1.37682100  | 0.33904600  | 2.16524600  |
| H | 2.51041300  | 1.38029200  | 1.29617400  |
| H | -3.07509800 | 0.26353000  | -1.26148500 |
| H | -1.54023600 | 0.11606200  | -2.14647300 |
| H | -2.23612800 | -1.30600400 | -1.34304800 |
| H | 0.78845200  | 1.77878000  | -1.30841600 |
| H | 2.51047200  | 1.38060300  | -1.29590100 |
| H | 1.37688300  | 0.33958400  | -2.16526100 |

### Entry 55

|   |             |             |             |
|---|-------------|-------------|-------------|
| N | 0.04547100  | 0.43244300  | -0.45731600 |
| C | 1.28341700  | -0.16724700 | -0.04820000 |
| C | -1.30299600 | -0.10798900 | -0.04488000 |
| F | 1.21000700  | -1.52017000 | -0.22227600 |
| F | 1.48950300  | 0.00061500  | 1.34278100  |
| O | 0.15762000  | 1.82109800  | -0.15666700 |
| C | 2.49856600  | 0.36839700  | -0.76810100 |
| C | -1.50775300 | -1.50819300 | -0.65205400 |
| C | -2.34029800 | 0.83628100  | -0.68117900 |
| C | -1.50140200 | -0.15532200 | 1.48280500  |
| H | 0.23012000  | 1.89070000  | 0.80976300  |
| H | 3.38374500  | -0.13123000 | -0.37302700 |
| H | 2.40087900  | 0.15669700  | -1.83289200 |
| H | 2.58482100  | 1.44261300  | -0.62301300 |
| H | -0.93119600 | -2.27795100 | -0.14359400 |
| H | -2.56594300 | -1.76840000 | -0.56911800 |
| H | -1.23816100 | -1.51237100 | -1.71023200 |
| H | -2.18694900 | 0.89860400  | -1.76072800 |
| H | -3.34213700 | 0.44270100  | -0.49376300 |
| H | -2.28299200 | 1.84397400  | -0.27162300 |
| H | -2.52180700 | -0.47851900 | 1.70503400  |
| H | -0.81102500 | -0.85139000 | 1.96043300  |
| H | -1.37139600 | 0.82912000  | 1.94242700  |

### 55-radical

|   |             |             |             |
|---|-------------|-------------|-------------|
| N | 0.04008500  | 0.57348600  | -0.13697700 |
| C | 1.31532100  | -0.12320300 | -0.02148800 |
| C | -1.31918300 | -0.08818400 | -0.00272500 |
| F | 1.43083400  | -1.01498500 | -1.06594100 |
| F | 1.29475100  | -0.91372800 | 1.11531400  |
| O | 0.08083900  | 1.85032300  | -0.07456200 |
| C | 2.51409100  | 0.78498700  | 0.00982200  |
| C | -1.27096200 | -1.58379800 | -0.34377200 |
| C | -2.25211900 | 0.63477800  | -0.98590200 |
| C | -1.79028500 | 0.12417500  | 1.44735100  |
| H | 3.39955800  | 0.15172600  | 0.07644200  |
| H | 2.55325900  | 1.38495200  | -0.89751600 |
| H | 2.46253400  | 1.44829000  | 0.87075000  |
| H | -0.62196000 | -2.14488300 | 0.32763900  |
| H | -2.28361600 | -1.98075500 | -0.23963700 |
| H | -0.94449600 | -1.75485800 | -1.37004400 |
| H | -1.90947500 | 0.50187700  | -2.01497600 |
| H | -3.25688900 | 0.21416400  | -0.90067700 |
| H | -2.29777000 | 1.70158600  | -0.77016000 |
| H | -2.80618000 | -0.26198500 | 1.56450800  |
| H | -1.14011900 | -0.39882900 | 2.15143000  |
| H | -1.79360200 | 1.18761400  | 1.69348800  |

### Entry 56

|   |             |             |             |
|---|-------------|-------------|-------------|
| N | 0.04379400  | 0.45643800  | -0.44547100 |
| C | 1.28096800  | -0.13590300 | -0.05459800 |
| C | -1.27589700 | -0.13958300 | -0.01442700 |
| C | -1.34568200 | -1.61879400 | -0.42256600 |
| C | -1.52060000 | 0.01293400  | 1.49743600  |
| C | -2.34403100 | 0.63798700  | -0.80109400 |
| F | 1.40287500  | -1.36425300 | -0.58834300 |
| F | 1.48056300  | -0.27083900 | 1.28373900  |
| F | 2.30189300  | 0.60991300  | -0.51704200 |
| O | 0.09551800  | 1.81587200  | 0.00154000  |
| H | -1.10151800 | -1.75762500 | -1.47739400 |
| H | -0.68860900 | -2.25413200 | 0.17096600  |
| H | -2.36859900 | -1.96741700 | -0.26304200 |
| H | -1.41128800 | 1.05222000  | 1.80918600  |
| H | -2.53905500 | -0.30648600 | 1.73368300  |
| H | -0.83420100 | -0.59641600 | 2.08656900  |
| H | -3.33219800 | 0.22464600  | -0.58668400 |
| H | -2.35541100 | 1.69255600  | -0.52442100 |

|   |             |            |             |
|---|-------------|------------|-------------|
| H | -2.16748500 | 0.55899200 | -1.87675300 |
| H | 0.29113600  | 2.31838200 | -0.79982800 |

### 56-radical

|   |             |             |             |
|---|-------------|-------------|-------------|
| N | -0.03575500 | 0.58989800  | -0.16563900 |
| O | -0.04255800 | 1.86189800  | -0.07307600 |
| C | -1.32351700 | -0.07439500 | -0.02430900 |
| C | 1.29353800  | -0.13013000 | -0.00472400 |
| C | 1.75874200  | 0.08148900  | 1.44574800  |
| C | 1.17773000  | -1.62458700 | -0.32718100 |
| C | 2.26001700  | 0.54155900  | -0.98946900 |
| F | -1.51454900 | -0.97624400 | -1.00750200 |
| F | -2.30887800 | 0.80630400  | -0.06892800 |
| F | -1.40998200 | -0.74884400 | 1.14818300  |
| H | 1.08488900  | -0.40269100 | 2.15560200  |
| H | 2.75623000  | -0.34452500 | 1.58001300  |
| H | 1.80613000  | 1.14578900  | 1.68189900  |
| H | 2.16774300  | -2.07114000 | -0.21030000 |
| H | 0.50322300  | -2.15374800 | 0.34676700  |
| H | 0.85451400  | -1.79942000 | -1.35405100 |
| H | 3.25037300  | 0.09163600  | -0.88844000 |
| H | 1.92611200  | 0.40533300  | -2.02087700 |
| H | 2.34315300  | 1.60973800  | -0.79270600 |

### Entry 57

|   |             |             |             |
|---|-------------|-------------|-------------|
| N | 0.02474800  | 0.48612300  | -0.40466000 |
| C | 1.24998800  | -0.17729500 | -0.03081800 |
| C | -1.25432400 | -0.08350700 | -0.02886800 |
| F | -2.19072000 | 0.63688100  | -0.74254000 |
| F | -1.54624700 | 0.17146500  | 1.28849400  |
| F | 1.33737700  | -1.31481200 | -0.80448700 |
| F | 1.20817400  | -0.64919600 | 1.27067200  |
| O | 0.06474800  | 1.84825900  | -0.00192500 |
| C | 2.49044000  | 0.65862300  | -0.21590300 |
| C | -1.43403000 | -1.55451900 | -0.31460100 |
| H | -0.17724000 | 2.32743100  | -0.80450500 |
| H | 3.34837000  | 0.01174400  | -0.03056100 |
| H | 2.53674800  | 1.03830700  | -1.23652000 |
| H | 2.49566400  | 1.48940100  | 0.48574700  |
| H | -0.78412700 | -2.15462400 | 0.31882500  |
| H | -2.47437600 | -1.79337000 | -0.09142100 |
| H | -1.22595300 | -1.76667300 | -1.36164800 |

### 57-radical

|   |             |            |             |
|---|-------------|------------|-------------|
| N | -0.03180400 | 0.58289600 | -0.12611900 |
|---|-------------|------------|-------------|

|   |             |             |             |
|---|-------------|-------------|-------------|
| C | 1.30347700  | -0.04537800 | -0.00366100 |
| C | -1.29051800 | -0.15664700 | -0.00587400 |
| O | -0.07223200 | 1.85647500  | -0.11140200 |
| F | 1.78054400  | 0.26278800  | 1.24298700  |
| F | -1.24353700 | -0.92048800 | 1.13819600  |
| F | 2.10646700  | 0.60717300  | -0.88652100 |
| F | -1.35872900 | -1.06304500 | -1.03755900 |
| C | -2.50432800 | 0.72836100  | -0.00033500 |
| C | 1.38488300  | -1.53303800 | -0.23588700 |
| H | -3.37732600 | 0.07949900  | 0.07650900  |
| H | -2.46912100 | 1.40885800  | 0.84820000  |
| H | -2.55111300 | 1.30733400  | -0.92096700 |
| H | 1.05993100  | -1.77874400 | -1.24506300 |
| H | 2.43215100  | -1.81126400 | -0.11316100 |
| H | 0.78217100  | -2.07540600 | 0.48914500  |

### Entry 59

|   |             |             |             |
|---|-------------|-------------|-------------|
| C | -1.10573800 | -0.29859400 | 0.00622600  |
| N | 0.00000000  | 0.51836700  | 0.04102200  |
| C | 1.10573800  | -0.29859400 | 0.00622700  |
| C | 2.51008200  | 0.18802900  | -0.01003700 |
| C | -2.51008200 | 0.18803000  | -0.01003900 |
| N | 0.69510000  | -1.53917400 | 0.00167900  |
| N | -0.69510100 | -1.53917500 | 0.00169000  |
| O | 0.00000100  | 1.89416900  | -0.11921700 |
| H | 2.68244500  | 0.87196700  | -0.84521800 |
| H | 2.76714100  | 0.71503400  | 0.91405300  |
| H | 3.16961000  | -0.67289100 | -0.11190400 |
| H | -2.76713900 | 0.71504000  | 0.91404800  |
| H | -2.68244500 | 0.87196400  | -0.84522300 |
| H | -3.16961000 | -0.67289000 | -0.11190000 |
| H | 0.00000100  | 2.26506700  | 0.77489500  |

### 59-radical

|   |             |             |             |
|---|-------------|-------------|-------------|
| C | 1.12392300  | -0.26958000 | -0.00003200 |
| N | 0.00000000  | 0.59243600  | -0.00003100 |
| O | 0.00000000  | 1.85766300  | -0.00002300 |
| C | -1.12392300 | -0.26958000 | 0.00003500  |
| C | -2.51983200 | 0.24168500  | 0.00007100  |
| C | 2.51983200  | 0.24168500  | 0.00004400  |
| N | -0.71308800 | -1.49123500 | -0.00003700 |
| N | 0.71308800  | -1.49123500 | -0.00007200 |
| H | -2.52041600 | 1.33199500  | 0.00070600  |
| H | -3.05338600 | -0.11454000 | -0.88343700 |
| H | -3.05370900 | -0.11561300 | 0.88294300  |

|   |            |             |             |
|---|------------|-------------|-------------|
| H | 2.52041600 | 1.33199500  | -0.00114000 |
| H | 3.05316000 | -0.11407300 | 0.88388000  |
| H | 3.05393500 | -0.11607900 | -0.88249900 |

### Entry 60

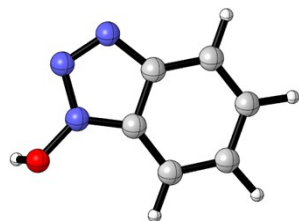

|   |            |            |            |
|---|------------|------------|------------|
| C | -0.5770113 | -0.2194461 | 0.0304903  |
| C | -0.1164313 | 1.1104259  | 0.0380273  |
| C | 1.2602477  | 1.3819429  | 0.0411813  |
| C | 2.1200407  | 0.2992539  | 0.0423013  |
| C | 1.6362927  | -1.0325271 | 0.0392653  |
| C | 0.2831677  | -1.3234821 | 0.0319653  |
| N | -1.2031413 | 1.9608449  | 0.0423933  |
| N | -2.2835923 | 1.2505669  | 0.0527063  |
| N | -1.9291143 | -0.0530161 | 0.0119413  |
| H | 1.6202087  | 2.4033899  | 0.0446463  |
| H | 3.1908497  | 0.4649939  | 0.0474253  |
| H | 2.3506877  | -1.8477511 | 0.0441363  |
| H | -0.0896903 | -2.3394251 | 0.0342843  |
| O | -2.8658353 | -1.0410931 | 0.1546233  |
| H | -3.3966793 | -1.0146781 | -0.6553867 |

### 60-radical

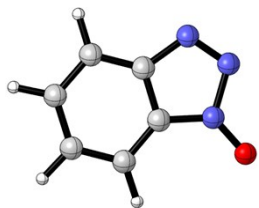

|   |            |            |            |
|---|------------|------------|------------|
| C | 0.7972162  | -0.3297959 | -0.0000113 |
| C | 0.3949522  | 1.0047781  | 0.0000047  |
| C | -0.9533868 | 1.3470641  | 0.0000137  |
| C | -1.8682998 | 0.2963651  | 0.0000117  |
| C | -1.4476848 | -1.0470999 | 0.0000127  |
| C | -0.0985428 | -1.3925219 | 0.0000047  |
| N | 1.5363002  | 1.8223631  | -0.0000533 |
| N | 2.5843462  | 1.1095651  | 0.0002567  |
| N | 2.1899722  | -0.2630879 | -0.0001003 |
| H | -1.2672188 | 2.3833991  | 0.0000017  |
| H | -2.9296528 | 0.5139221  | 0.0000007  |

|   |            |            |            |
|---|------------|------------|------------|
| H | -2.1944918 | -1.8322219 | -0.0000013 |
| H | 0.2375372  | -2.4214329 | -0.0000203 |
| O | 3.0189532  | -1.1912969 | -0.0001203 |

### Entry 61

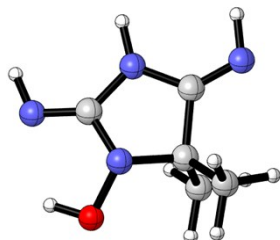

|   |            |            |             |
|---|------------|------------|-------------|
| C | -1.6128110 | 0.6484599  | 0.0144094   |
| N | -0.9313911 | -0.4456741 | 0.5123355   |
| C | 0.5076840  | -0.3654171 | 0.1675544   |
| C | 1.3723930  | -0.9237821 | 1.2954865   |
| C | 0.8187730  | -1.0427261 | -1.1798655  |
| N | -2.8660450 | 0.6049819  | -0.2225756  |
| O | -1.5576690 | -1.6844621 | 0.2733174   |
| N | -0.6496420 | 1.6436049  | -0.1616746  |
| C | 0.6451069  | 1.1571579  | 0.0171074   |
| N | 1.7546000  | 1.7692329  | 0.0291724   |
| H | 1.1303690  | -0.4380431 | 2.2420004   |
| H | 2.4267130  | -0.7524631 | 1.0742794   |
| H | 1.1971460  | -1.9970261 | 1.3980134   |
| H | 0.1920180  | -0.6447121 | -1.9817646  |
| H | 0.6406000  | -2.1160311 | -1.1068715  |
| H | 1.8649440  | -0.8657611 | -1.4342616  |
| H | -3.2466210 | 1.4679479  | -0.5954246  |
| H | -2.4589660 | -1.4124921 | 0.0076234   |
| H | -0.8800271 | 2.6222779  | -0.2399766  |
| H | 1.6528260  | 2.7749269  | -0.10888566 |

### 61-radical

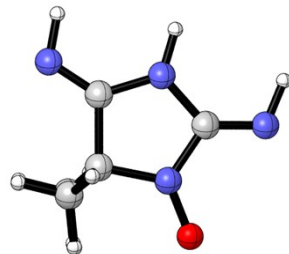

|   |            |            |            |
|---|------------|------------|------------|
| C | 1.8380722  | 0.4482522  | -0.0298800 |
| N | 1.0446642  | -0.7244638 | -0.0296120 |
| C | -0.4206588 | -0.4343858 | 0.0025500  |
| C | -1.0883178 | -0.9846188 | -1.2628020 |
| C | -1.0390398 | -1.0174098 | 1.2782180  |
| N | 3.1034472  | 0.4434082  | -0.0544730 |



|   |            |            |            |
|---|------------|------------|------------|
| O | 1.5083022  | -1.8968398 | -0.0537250 |
| N | 0.9084292  | 1.4953582  | 0.0016560  |
| C | -0.4217918 | 1.0917052  | 0.0222600  |
| N | -1.4833858 | 1.7848362  | 0.0518300  |
| H | -0.6341838 | -0.5648958 | -2.1631160 |
| H | -2.1473098 | -0.7243218 | -1.2532360 |
| H | -0.9781678 | -2.0700628 | -1.2893130 |
| H | -0.5501358 | -0.6208248 | 2.1707770  |
| H | -0.9284888 | -2.1031218 | 1.2724320  |
| H | -2.0974758 | -0.7574818 | 1.3164300  |
| H | 3.4920972  | 1.3838322  | -0.0498760 |
| H | 1.1954352  | 2.4623592  | 0.0086140  |
| H | -1.3014908 | 2.7886752  | 0.0612660  |

### Entry 62

|   |             |             |             |
|---|-------------|-------------|-------------|
| C | 2.13517600  | 1.33505800  | -0.02085400 |
| C | 0.85490100  | 0.79087700  | -0.02267200 |
| C | 0.69323300  | -0.59178400 | 0.00339900  |
| C | 1.76292200  | -1.47216300 | 0.01408300  |
| C | 3.04387100  | -0.91720200 | 0.02101400  |
| C | 3.22706000  | 0.46900300  | 0.00504300  |
| S | -1.04161700 | -1.02538700 | 0.01762000  |
| O | -1.50717700 | -1.40039700 | 1.34259900  |
| O | -1.40629900 | -1.83272800 | -1.13576000 |
| N | -1.46775500 | 0.66362200  | -0.31163300 |
| C | -0.41678500 | 1.56715200  | -0.05781400 |
| O | -0.55038400 | 2.75765100  | 0.06319100  |
| O | -2.73903800 | 1.02685900  | 0.09663700  |
| H | 2.26019600  | 2.41074700  | -0.04114200 |
| H | 1.61350400  | -2.54452200 | 0.02449400  |
| H | 3.90642100  | -1.57278100 | 0.03995100  |
| H | 4.23213100  | 0.87368600  | 0.01075900  |
| H | -3.25117300 | 1.09697400  | -0.72109000 |

### 62-radical

|   |             |             |             |
|---|-------------|-------------|-------------|
| C | 2.14064200  | 1.27246400  | -0.00013800 |
| C | 0.83776400  | 0.77786900  | 0.00000100  |
| C | 0.62773000  | -0.60320700 | 0.00027900  |
| C | 1.67029200  | -1.51619500 | 0.00034600  |
| C | 2.97013700  | -1.00809200 | 0.00022000  |
| C | 3.20178300  | 0.37077700  | -0.00005000 |
| S | -1.11055100 | -1.01624100 | -0.00009000 |
| O | -1.53203700 | -1.59177300 | 1.26484000  |
| O | -1.53115600 | -1.59159600 | -1.26546600 |
| N | -1.53256300 | 0.77696000  | 0.00001700  |
| C | -0.37333100 | 1.63095600  | -0.00003000 |

|   |             |             |             |
|---|-------------|-------------|-------------|
| O | -0.44183900 | 2.82961900  | -0.00002800 |
| O | -2.71622200 | 1.16210400  | 0.00030100  |
| H | 2.30333300  | 2.34324900  | -0.00032200 |
| H | 1.48486300  | -2.58302100 | 0.00058300  |
| H | 3.80854700  | -1.69441100 | 0.00032300  |
| H | 4.21993300  | 0.74104800  | -0.00020500 |

#### Entry 64

|   |             |             |             |
|---|-------------|-------------|-------------|
| S | -1.42624700 | -0.25368500 | 0.09339600  |
| O | -1.89817700 | 0.14184700  | 1.39720100  |
| O | -1.09972700 | -1.62227700 | -0.25010800 |
| O | -2.47691600 | 0.28641500  | -1.01181500 |
| S | 1.56134200  | -0.05222600 | 0.08350800  |
| O | 2.51772900  | 0.90396700  | -0.40257200 |
| O | 1.50692900  | -0.48932100 | 1.45868300  |
| O | 1.60108900  | -1.30709600 | -0.91240300 |
| N | -0.02572000 | 0.63276700  | -0.43571200 |
| O | -0.12954400 | 1.96182100  | 0.00689200  |
| H | -3.08550200 | 0.91021200  | -0.58411500 |
| H | 0.87459500  | -1.92410100 | -0.69154600 |
| H | 0.05836200  | 2.47623900  | -0.79183200 |

#### 64-radical

|   |             |             |             |
|---|-------------|-------------|-------------|
| S | 1.58560700  | -0.26692300 | 0.02739100  |
| O | 1.69935100  | -1.29794800 | -0.96198900 |
| O | 1.70391800  | -0.48234900 | 1.45142700  |
| S | -1.58710200 | -0.22510500 | 0.11070100  |
| O | -2.15451900 | 0.36619200  | 1.29795900  |
| N | -0.01891500 | 0.65789600  | -0.25081100 |
| O | -0.00535200 | 1.88498200  | -0.04438600 |
| O | 2.54205400  | 0.93782600  | -0.44705900 |
| H | 2.48667700  | 1.68839900  | 0.16860900  |
| O | -2.42142500 | 0.26732000  | -1.18117200 |
| H | -2.83290000 | 1.12895000  | -1.00066600 |
| O | -1.30120700 | -1.61979500 | -0.06749800 |

#### Entry 65

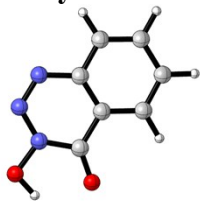

|   |            |            |            |
|---|------------|------------|------------|
| C | -0.4978943 | -1.5959979 | 0.3331807  |
| C | 0.1832337  | -0.3655129 | -0.0040033 |
| C | -0.5661133 | 0.8297021  | 0.0497367  |

|   |            |            |            |
|---|------------|------------|------------|
| C | 1.5380327  | -0.3414319 | -0.3730873 |
| C | 0.0581067  | 2.0510031  | -0.2709063 |
| C | 1.3901797  | 2.0624151  | -0.6322613 |
| C | 2.1329997  | 0.8660611  | -0.6841093 |
| N | -1.9052593 | 0.8655221  | 0.4071067  |
| N | -2.5151963 | -0.2116129 | 0.7059067  |
| O | -0.0753043 | -2.7458979 | 0.3619667  |
| N | -1.8366253 | -1.3586909 | 0.6653107  |
| O | -2.5859793 | -2.4582299 | 1.0045857  |
| H | 2.0886477  | -1.2731939 | -0.4059173 |
| H | -0.5322713 | 2.9575591  | -0.2241953 |
| H | 1.8722787  | 3.0011261  | -0.8793393 |
| H | 3.1776737  | 0.8960601  | -0.9701213 |
| H | -1.9265093 | -3.1788799 | 0.9161467  |

### 65-radical

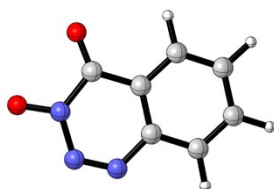

|   |            |            |            |
|---|------------|------------|------------|
| C | -1.7610645 | 0.8581419  | -0.0003260 |
| C | -0.3611335 | 0.4475909  | -0.0001540 |
| C | -0.0568795 | -0.9253271 | 0.0002390  |
| C | 0.6705765  | 1.3937489  | -0.0003780 |
| C | 1.2796515  | -1.3480021 | 0.0003960  |
| C | 2.2944275  | -0.4035781 | 0.0001680  |
| C | 1.9906075  | 0.9657669  | -0.0002170 |
| N | -1.0381205 | -1.9184601 | 0.0004960  |
| N | -2.2645615 | -1.6530581 | 0.0004050  |
| O | -2.2015545 | 1.9768799  | -0.0005680 |
| N | -2.6714395 | -0.2928411 | 0.0000050  |
| O | -3.9042775 | -0.1055321 | 0.0000140  |
| H | 0.4167405  | 2.4463729  | -0.0006770 |
| H | 1.4852365  | -2.4111581 | 0.0006990  |
| H | 3.3292575  | -0.7249901 | 0.0002900  |
| H | 2.7925335  | 1.6944449  | -0.0003920 |

### Entry 66

|   |             |             |             |
|---|-------------|-------------|-------------|
| N | 0.00000000  | 0.01644800  | -0.40827600 |
| C | 1.20901300  | -0.64881100 | 0.06727800  |
| C | -1.20901300 | -0.64881100 | 0.06727800  |
| H | 1.23229500  | -1.65729100 | -0.35271700 |
| H | 2.08365400  | -0.10295900 | -0.28737700 |
| H | 1.24709600  | -0.71245700 | 1.16527700  |
| H | -2.08365400 | -0.10295900 | -0.28737700 |

|   |             |             |             |
|---|-------------|-------------|-------------|
| H | -1.23229500 | -1.65729100 | -0.35271700 |
| H | -1.24709600 | -0.71245700 | 1.16527700  |
| O | 0.00000000  | 1.33634800  | 0.19586100  |
| H | 0.00000000  | 1.92523100  | -0.56666400 |

### 66-radical

|   |             |             |             |
|---|-------------|-------------|-------------|
| N | 0.00000000  | 0.11837200  | -0.15233300 |
| O | 0.00000000  | 1.38313500  | 0.04296200  |
| C | 1.25748000  | -0.60258400 | 0.02552900  |
| C | -1.25748000 | -0.60258400 | 0.02552900  |
| H | 1.22684600  | -1.54682700 | -0.52196600 |
| H | 2.06023200  | 0.02471900  | -0.35834500 |
| H | 1.43997800  | -0.80923100 | 1.08845600  |
| H | -2.06023200 | 0.02471800  | -0.35834500 |
| H | -1.22684500 | -1.54682700 | -0.52196700 |
| H | -1.43997700 | -0.80923100 | 1.08845600  |

### Entry 67

|   |             |             |             |
|---|-------------|-------------|-------------|
| C | -0.49810900 | 0.51658600  | -0.11983700 |
| C | 0.78528400  | 0.09696600  | -0.10280900 |
| C | 1.17590500  | -1.41441100 | -0.03910000 |
| C | 1.16696500  | -1.89173800 | 1.43817000  |
| C | 0.20464000  | -2.30171100 | -0.86059500 |
| C | 2.56696200  | -1.76451700 | -0.62871300 |
| C | 1.87152300  | 1.22627200  | -0.06576900 |
| C | 2.81049300  | 1.06792800  | 1.15768700  |
| C | 2.70147000  | 1.27335300  | -1.37643300 |
| C | 1.26865300  | 2.64652000  | 0.07993600  |
| N | -1.70217600 | -0.24484600 | -0.09233400 |
| C | -2.90245400 | 0.52390300  | -0.49052700 |
| C | -3.34487600 | 1.58779100  | 0.52614300  |
| C | -4.04312000 | -0.43850600 | -0.82802500 |
| O | -1.93159900 | -0.78224000 | 1.24091900  |
| H | -0.68481100 | 1.57946300  | -0.17902500 |
| H | 1.96479200  | -1.42294600 | 2.01740000  |
| H | 0.22067200  | -1.65543900 | 1.92362600  |
| H | 1.32412200  | -2.97523800 | 1.47749200  |
| H | 0.14868600  | -1.95875700 | -1.89708200 |
| H | 0.58283700  | -3.32834800 | -0.86400200 |
| H | -0.81106400 | -2.31767000 | -0.47792400 |
| H | 2.73575300  | -2.83535300 | -0.48271300 |
| H | 3.39714100  | -1.24614300 | -0.15399000 |
| H | 2.60894100  | -1.57554600 | -1.70332900 |
| H | 2.24146800  | 1.12676200  | 2.08952300  |
| H | 3.36744300  | 0.13328800  | 1.16533000  |

|   |             |             |             |
|---|-------------|-------------|-------------|
| H | 3.54216900  | 1.88181900  | 1.16193700  |
| H | 2.04015800  | 1.35751800  | -2.24350700 |
| H | 3.34991500  | 2.15515600  | -1.36572000 |
| H | 3.33977600  | 0.40642100  | -1.52168400 |
| H | 2.08900700  | 3.36505000  | 0.15576700  |
| H | 0.66801800  | 2.93901300  | -0.78511600 |
| H | 0.65838100  | 2.74706000  | 0.98039200  |
| H | -2.59453300 | 1.02056500  | -1.41760600 |
| H | -2.54457500 | 2.29510000  | 0.75633800  |
| H | -4.18840800 | 2.15732000  | 0.12663900  |
| H | -3.65761700 | 1.11636200  | 1.45938700  |
| H | -3.72332000 | -1.17315400 | -1.57073800 |
| H | -4.37985700 | -0.96957300 | 0.06630300  |
| H | -4.89869700 | 0.11070000  | -1.23020100 |
| H | -2.00838200 | -1.73220200 | 1.09072000  |

### 67-radical

|   |             |             |             |
|---|-------------|-------------|-------------|
| C | -0.50185500 | -0.53987700 | 0.07613100  |
| C | 0.80155000  | -0.10841800 | 0.06143500  |
| C | 1.19473900  | 1.39796100  | -0.00509800 |
| C | 0.37364700  | 2.20423800  | 1.03682000  |
| C | 2.66698300  | 1.74621200  | 0.33328300  |
| C | 0.93238100  | 1.93491400  | -1.43839100 |
| C | 1.86514900  | -1.25647100 | 0.05028100  |
| C | 1.24716400  | -2.67714000 | 0.09418000  |
| C | 2.66928800  | -1.20600700 | -1.27593500 |
| C | 2.82621700  | -1.20059500 | 1.26757600  |
| N | -1.73395900 | 0.07415900  | -0.10475000 |
| C | -2.97516300 | -0.70339400 | 0.20591300  |
| C | -3.79747000 | -0.88863800 | -1.07063700 |
| C | -3.75689400 | 0.01063900  | 1.31047200  |
| O | -1.92517900 | 1.24960900  | -0.56844300 |
| H | -0.67277200 | -1.58977000 | 0.24000300  |
| H | -0.69266000 | 2.19381500  | 0.83327000  |
| H | 0.55255700  | 1.81365000  | 2.04313300  |
| H | 0.70227400  | 3.24826900  | 1.02309400  |
| H | 3.40696500  | 1.24184200  | -0.28594700 |
| H | 2.79316500  | 2.81901300  | 0.16473400  |
| H | 2.90333400  | 1.56105300  | 1.38208600  |
| H | 1.59781600  | 1.45369100  | -2.16076800 |
| H | 1.13204900  | 3.01154300  | -1.46863600 |
| H | -0.09921900 | 1.77363600  | -1.74303300 |
| H | 0.70776300  | -2.86916000 | 1.02622700  |
| H | 0.57829300  | -2.87260300 | -0.74739100 |
| H | 2.05740100  | -3.40796500 | 0.03786400  |

|   |             |             |             |
|---|-------------|-------------|-------------|
| H | 3.18437600  | -0.26087200 | -1.43366600 |
| H | 3.42460900  | -1.99840400 | -1.27910000 |
| H | 2.00626300  | -1.37000800 | -2.12974100 |
| H | 3.41541200  | -2.12175200 | 1.30631600  |
| H | 3.52827900  | -0.37382500 | 1.22905500  |
| H | 2.26359800  | -1.12810700 | 2.20268900  |
| H | -2.64493800 | -1.67758600 | 0.57297000  |
| H | -3.22674600 | -1.42440400 | -1.83334700 |
| H | -4.70174400 | -1.46202600 | -0.85163300 |
| H | -4.08650200 | 0.08287900  | -1.47472200 |
| H | -3.15751000 | 0.10658100  | 2.21911100  |
| H | -4.04726800 | 1.00926600  | 0.97949300  |
| H | -4.66006300 | -0.55527600 | 1.55255600  |

### Entry 68

|   |             |             |             |
|---|-------------|-------------|-------------|
| C | 0.11001200  | -0.05757500 | 0.47258600  |
| C | -0.97418800 | -0.41577300 | -0.21996200 |
| C | -2.39598600 | 0.05627400  | 0.02361100  |
| C | -2.50387800 | 1.07125100  | 1.17335000  |
| C | -2.92431300 | 0.70734900  | -1.27557400 |
| C | -3.27274000 | -1.17405000 | 0.35423500  |
| N | 1.41963000  | -0.56061600 | 0.32983900  |
| C | 2.50659300  | 0.44686900  | 0.38442900  |
| C | 2.52872000  | 1.37995100  | -0.83304800 |
| C | 3.84988300  | -0.24776700 | 0.60655200  |
| H | 0.05474900  | 0.64660000  | 1.29605000  |
| H | -0.84932400 | -1.12034800 | -1.03673100 |
| H | -2.16396700 | 0.64332300  | 2.12108900  |
| H | -1.91444000 | 1.97076000  | 0.97236800  |
| H | -3.54471400 | 1.38089400  | 1.30528900  |
| H | -2.86146300 | 0.01059000  | -2.11683600 |
| H | -3.97189000 | 1.00608700  | -1.16368100 |
| H | -2.34026500 | 1.59517500  | -1.53321900 |
| H | -4.32180300 | -0.88424700 | 0.47628000  |
| H | -3.22147500 | -1.91830000 | -0.44617100 |
| H | -2.93954300 | -1.65241300 | 1.27937700  |
| H | 2.27188000  | 1.03423700  | 1.27900200  |
| H | 1.56516200  | 1.87745800  | -0.96658300 |
| H | 3.29638400  | 2.14841300  | -0.70699700 |
| H | 2.75130000  | 0.81802700  | -1.74247400 |
| H | 3.80878000  | -0.90038900 | 1.48210100  |
| H | 4.12475100  | -0.84793500 | -0.26422600 |
| H | 4.63785000  | 0.49306000  | 0.76513300  |
| O | 1.55351500  | -1.34278900 | -0.86222900 |
| H | 1.70787800  | -2.23353800 | -0.52788900 |

**68-radical**

|   |             |             |             |
|---|-------------|-------------|-------------|
| C | 0.09970000  | 0.00418100  | 0.25778600  |
| C | -1.03656200 | -0.01041300 | -0.46825400 |
| C | -2.45010700 | 0.00165700  | 0.06803600  |
| C | -2.50988100 | 0.03883700  | 1.60404600  |
| C | -3.17360900 | 1.24580100  | -0.50036800 |
| C | -3.17281700 | -1.26925300 | -0.43884900 |
| N | 1.36934800  | -0.00889700 | -0.31207000 |
| C | 2.58881900  | 0.01199600  | 0.54107600  |
| C | 3.39536800  | 1.28103700  | 0.25459000  |
| C | 3.40059100  | -1.26476900 | 0.30930100  |
| O | 1.53646500  | -0.03707600 | -1.57588500 |
| H | 0.10894900  | 0.02705700  | 1.33925100  |
| H | -0.92848000 | -0.03318900 | -1.54909300 |
| H | -2.02675400 | -0.83707400 | 2.04695400  |
| H | -2.02857500 | 0.93607900  | 2.00413400  |
| H | -3.55093900 | 0.04566100  | 1.93865000  |
| H | -3.15016800 | 1.24881900  | -1.59377800 |
| H | -4.22191300 | 1.25737300  | -0.18516700 |
| H | -2.70088200 | 2.16791000  | -0.15175300 |
| H | -4.22090700 | -1.26601100 | -0.12259100 |
| H | -3.15027600 | -1.32572000 | -1.53080300 |
| H | -2.69933800 | -2.17293400 | -0.04578000 |
| H | 2.23099200  | 0.03345800  | 1.57379500  |
| H | 2.80226200  | 2.17762000  | 0.45043800  |
| H | 4.28438700  | 1.30996100  | 0.88957300  |
| H | 3.70958600  | 1.29659200  | -0.79046200 |
| H | 2.81190600  | -2.15449000 | 0.54562500  |
| H | 3.71300400  | -1.32485600 | -0.73465100 |
| H | 4.29096600  | -1.26181700 | 0.94304200  |

**Entry 69**

|   |             |             |             |
|---|-------------|-------------|-------------|
| N | -1.31791700 | 0.13258800  | -0.45265500 |
| C | -2.12211400 | -0.98353700 | 0.16648600  |
| C | -1.20214400 | -2.15604600 | 0.54149200  |
| C | -2.90850100 | -0.52160800 | 1.41093800  |
| C | -3.10561200 | -1.47314600 | -0.91176000 |
| C | -0.19300100 | 0.67186900  | 0.37742300  |
| C | 0.05327300  | 2.19712100  | 0.14051700  |
| C | 0.53405500  | 2.55590200  | -1.27239200 |
| C | 1.01757700  | 2.76985900  | 1.18971900  |
| C | 1.07055300  | -0.14716300 | 0.12499100  |
| C | 1.93351400  | -0.44478200 | 1.18560800  |
| C | 1.42559800  | -0.58154100 | -1.15680300 |
| C | 3.11946700  | -1.14666800 | 0.97609400  |
| C | 2.60933900  | -1.28468500 | -1.37105100 |

|   |             |             |             |
|---|-------------|-------------|-------------|
| C | 3.46319100  | -1.56939700 | -0.30626200 |
| O | -2.27618100 | 1.19111700  | -0.71054500 |
| H | -0.61567900 | -2.49633500 | -0.31353500 |
| H | -0.51372500 | -1.90907400 | 1.34975900  |
| H | -1.82520500 | -2.98737000 | 0.88209700  |
| H | -3.55783800 | 0.32042800  | 1.16909900  |
| H | -3.53098100 | -1.34193600 | 1.77862800  |
| H | -2.24635800 | -0.22605300 | 2.22897800  |
| H | -2.56339800 | -1.76624400 | -1.81492700 |
| H | -3.65766900 | -2.34311600 | -0.54643700 |
| H | -3.82890900 | -0.69939100 | -1.17109300 |
| H | -0.43605500 | 0.58376200  | 1.44498400  |
| H | -0.91594800 | 2.67256000  | 0.29579200  |
| H | -0.11557000 | 2.14751100  | -2.04972900 |
| H | 0.55024100  | 3.64317100  | -1.39269400 |
| H | 1.54591600  | 2.18673400  | -1.45771200 |
| H | 0.67071800  | 2.57080500  | 2.20846300  |
| H | 2.02601800  | 2.36024800  | 1.08934600  |
| H | 1.08830800  | 3.85514100  | 1.07260900  |
| H | 1.67079200  | -0.13329900 | 2.19172900  |
| H | 0.75542700  | -0.38397100 | -1.98347900 |
| H | 3.76939700  | -1.36872500 | 1.81548300  |
| H | 2.86353600  | -1.61508200 | -2.37252600 |
| H | 4.38193500  | -2.12052700 | -0.47304500 |
| H | -2.25125100 | 1.27664500  | -1.66884400 |

### 69-radical

|   |             |             |             |
|---|-------------|-------------|-------------|
| N | 1.26676500  | -0.03346100 | 0.45952400  |
| O | 1.40262400  | 0.24267100  | 1.70215700  |
| C | 2.34496300  | -0.81504500 | -0.24277100 |
| C | 1.70785500  | -1.83986300 | -1.19728300 |
| C | 3.24467500  | 0.16829600  | -1.01807900 |
| C | 3.16861100  | -1.55043800 | 0.82025300  |
| C | 0.16710800  | 0.61366600  | -0.29523500 |
| C | 0.06978300  | 2.14383900  | 0.02123100  |
| C | -0.65444200 | 2.49761600  | 1.32630500  |
| C | -0.57009900 | 2.88790500  | -1.16120800 |
| C | -1.14168800 | -0.15582700 | -0.14230700 |
| C | -1.98089300 | -0.31760700 | -1.24991100 |
| C | -1.53742300 | -0.70565600 | 1.08289900  |
| C | -3.19299200 | -0.99801400 | -1.13914800 |
| C | -2.74615900 | -1.38964700 | 1.19368900  |
| C | -3.58036000 | -1.53586100 | 0.08578900  |
| H | 1.03595900  | -2.51047900 | -0.65781100 |
| H | 1.14338900  | -1.37034400 | -2.00527100 |
| H | 2.49682000  | -2.44081800 | -1.65688500 |



|   |             |             |             |
|---|-------------|-------------|-------------|
| H | 3.68756100  | 0.89866000  | -0.33710600 |
| H | 4.05503400  | -0.37432600 | -1.51285600 |
| H | 2.68833400  | 0.70729100  | -1.78970100 |
| H | 2.54121100  | -2.22885700 | 1.40130400  |
| H | 3.94686500  | -2.13435000 | 0.32236500  |
| H | 3.63800600  | -0.85308300 | 1.51263000  |
| H | 0.45657400  | 0.54465900  | -1.34528800 |
| H | 1.10763500  | 2.48400500  | 0.10962800  |
| H | -0.60240600 | 3.57834400  | 1.49051300  |
| H | -1.71148600 | 2.22127600  | 1.27996800  |
| H | -0.19981900 | 1.99802200  | 2.18037400  |
| H | -0.56382200 | 3.96539200  | -0.97476400 |
| H | -0.03175000 | 2.71046300  | -2.09787300 |
| H | -1.61195300 | 2.58730100  | -1.30602600 |
| H | -1.68278000 | 0.08462900  | -2.21298800 |
| H | -0.89160700 | -0.60066500 | 1.94597600  |
| H | -3.82754100 | -1.11382400 | -2.01093800 |
| H | -3.03648300 | -1.81082800 | 2.14999900  |
| H | -4.51973600 | -2.06979700 | 0.17546700  |

### Entry 70

|   |             |             |             |
|---|-------------|-------------|-------------|
| N | 0.97566100  | -0.64347800 | -0.40245400 |
| O | 0.93326600  | -1.48137900 | -1.56493200 |
| C | 2.27438400  | -0.16200800 | -0.13653600 |
| C | 3.40902900  | -0.66902500 | -0.78574200 |
| C | 2.43882500  | 0.81604200  | 0.85925200  |
| C | 4.67483100  | -0.20264100 | -0.43998800 |
| C | 3.71056800  | 1.27364800  | 1.18918000  |
| C | 4.83936000  | 0.76899300  | 0.54528400  |
| C | -0.08773300 | 0.30908800  | -0.41667400 |
| C | -1.36872100 | 0.12123000  | -0.04480700 |
| C | -2.33278000 | 1.33012600  | -0.29760900 |
| C | -2.77384000 | 1.99306300  | 1.03417200  |
| C | -1.67391800 | 2.46387400  | -1.12329500 |
| C | -3.57607500 | 0.90924200  | -1.12250900 |
| C | -1.88406000 | -1.23466500 | 0.53497800  |
| C | -2.32775500 | -2.15963400 | -0.63012600 |
| C | -0.80575500 | -1.98155300 | 1.36493200  |
| C | -3.07593900 | -1.10302900 | 1.51772500  |
| H | 0.77257500  | -2.36540600 | -1.20884000 |
| H | 3.29132500  | -1.41061200 | -1.56237600 |
| H | 1.57220400  | 1.19962300  | 1.38327600  |
| H | 5.54115100  | -0.60317000 | -0.95538200 |
| H | 3.81662200  | 2.02718900  | 1.96203500  |
| H | 5.82820700  | 1.12623000  | 0.80733800  |

|   |             |             |             |
|---|-------------|-------------|-------------|
| H | 0.22881500  | 1.27003700  | -0.80027700 |
| H | -3.41361500 | 1.36235100  | 1.64569200  |
| H | -1.90063400 | 2.27060400  | 1.63109700  |
| H | -3.33176000 | 2.90897000  | 0.81587400  |
| H | -1.30383600 | 2.11010200  | -2.08808400 |
| H | -2.42651100 | 3.23246800  | -1.31774800 |
| H | -0.85214900 | 2.95005000  | -0.59247100 |
| H | -4.20743800 | 1.78612400  | -1.29396800 |
| H | -3.27793900 | 0.51976200  | -2.09968400 |
| H | -4.19405600 | 0.15770700  | -0.63572500 |
| H | -3.21282400 | -1.77925100 | -1.14165300 |
| H | -1.53725400 | -2.26536000 | -1.37458100 |
| H | -2.57268000 | -3.15231900 | -0.23833000 |
| H | -0.35268200 | -1.32493500 | 2.11116900  |
| H | -1.28562600 | -2.81093300 | 1.89261800  |
| H | 0.00254200  | -2.39808200 | 0.76874200  |
| H | -3.38592000 | -2.10846600 | 1.81552400  |
| H | -2.78645700 | -0.57070800 | 2.42652800  |
| H | -3.95034500 | -0.61309900 | 1.09644600  |

### 70-radical

|   |             |             |             |
|---|-------------|-------------|-------------|
| N | 0.99719100  | -0.50276600 | -0.62968900 |
| C | 2.29092800  | -0.07976400 | -0.23038100 |
| C | 3.41461600  | -0.73962100 | -0.74792300 |
| C | 2.45318400  | 0.97158100  | 0.68336600  |
| C | 4.68526700  | -0.33524800 | -0.36022100 |
| C | 3.73417600  | 1.36697500  | 1.05751300  |
| C | 4.85477500  | 0.71996200  | 0.53912400  |
| C | -0.11564500 | 0.37377200  | -0.46705400 |
| C | -1.37970800 | 0.11007200  | -0.07350400 |
| O | 0.87476200  | -1.60216700 | -1.27741500 |
| C | -2.38729200 | 1.29566200  | -0.25004100 |
| C | -1.78215600 | 2.49450600  | -1.02269300 |
| C | -3.61311400 | 0.85514300  | -1.09175800 |
| C | -2.85017900 | 1.87540400  | 1.11256000  |
| C | -1.81957900 | -1.28000900 | 0.48366300  |
| C | -0.68641200 | -1.94997900 | 1.30715000  |
| C | -3.01870400 | -1.23162400 | 1.46510200  |
| C | -2.20143500 | -2.21776400 | -0.69247100 |
| H | 3.26516000  | -1.55386200 | -1.44322200 |
| H | 1.58748400  | 1.45651000  | 1.11556000  |
| H | 5.55172900  | -0.84544500 | -0.76566200 |
| H | 3.85399100  | 2.17762700  | 1.76730000  |
| H | 5.84975900  | 1.02986700  | 0.83640200  |
| H | 0.16543800  | 1.37442800  | -0.75785300 |

|   |             |             |             |
|---|-------------|-------------|-------------|
| H | -1.40117500 | 2.20530200  | -2.00480400 |
| H | -0.98186400 | 2.99324600  | -0.46940900 |
| H | -2.56797000 | 3.23772500  | -1.17902900 |
| H | -3.30155200 | 0.54160900  | -2.09165100 |
| H | -4.17850800 | 0.03958200  | -0.64707000 |
| H | -4.29521700 | 1.70301500  | -1.20551000 |
| H | -3.47667000 | 1.19758400  | 1.68525500  |
| H | -3.43054600 | 2.78666900  | 0.93860700  |
| H | -1.98768900 | 2.14428100  | 1.72907700  |
| H | -1.10145600 | -2.81197000 | 1.83666700  |
| H | -0.28692100 | -1.26335800 | 2.05906300  |
| H | 0.13061700  | -2.31610400 | 0.69254000  |
| H | -3.92483000 | -0.79702800 | 1.04854800  |
| H | -3.26028100 | -2.26017400 | 1.74589600  |
| H | -2.76813900 | -0.69708900 | 2.38407500  |
| H | -2.44445500 | -3.20998100 | -0.29828400 |
| H | -1.37105500 | -2.31606900 | -1.38976200 |
| H | -3.07660100 | -1.85407800 | -1.23419700 |

### Entry 71

|   |             |             |             |
|---|-------------|-------------|-------------|
| N | 1.27971900  | 0.11342300  | 0.40247800  |
| C | 2.63839700  | 0.12688000  | -0.23125000 |
| C | 3.56512500  | 0.93219100  | 0.69538300  |
| C | 3.21642700  | -1.28445400 | -0.44938200 |
| C | 2.52638100  | 0.87908100  | -1.56960400 |
| C | 0.24800400  | -0.66220100 | -0.29768900 |
| C | -1.16933100 | -0.33061300 | 0.18992000  |
| C | -1.56534600 | 1.12385700  | -0.11305100 |
| C | -2.19203300 | -1.30490500 | -0.42142900 |
| C | -2.99581300 | 1.43941600  | 0.34667400  |
| C | -3.62652400 | -0.99539200 | 0.03208700  |
| C | -4.01151100 | 0.46134900  | -0.25983300 |
| O | 1.40332600  | -0.52149100 | 1.70501100  |
| H | 3.71347300  | 0.42215100  | 1.64773800  |
| H | 4.54294700  | 1.06195800  | 0.22450900  |
| H | 3.14353200  | 1.92272000  | 0.88890300  |
| H | 2.62534800  | -1.85851400 | -1.16748900 |
| H | 4.23562700  | -1.21755300 | -0.84045400 |
| H | 3.24786800  | -1.83620200 | 0.49217800  |
| H | 3.52857000  | 1.07093800  | -1.96117600 |
| H | 1.98648500  | 0.31043600  | -2.32926300 |
| H | 2.02299600  | 1.83931000  | -1.43196400 |
| H | 0.43311500  | -1.73945800 | -0.18196000 |
| H | 0.31671900  | -0.42545500 | -1.36197900 |
| H | -1.18582600 | -0.47360100 | 1.27833000  |
| H | -1.49153400 | 1.29141000  | -1.19742500 |

|   |             |             |             |
|---|-------------|-------------|-------------|
| H | -0.85034900 | 1.80623900  | 0.35422700  |
| H | -2.13918100 | -1.24092800 | -1.51770500 |
| H | -1.92916200 | -2.33549100 | -0.15780100 |
| H | -3.25722000 | 2.46964300  | 0.08252400  |
| H | -3.04608000 | 1.37812700  | 1.44193200  |
| H | -4.32991300 | -1.67889200 | -0.45512400 |
| H | -3.70975400 | -1.18124000 | 1.11088700  |
| H | -5.01694200 | 0.67070900  | 0.12053000  |
| H | -4.05173200 | 0.61235200  | -1.34675600 |
| H | 1.22371300  | 0.19805200  | 2.31896100  |

### 71-radical

|   |             |             |             |
|---|-------------|-------------|-------------|
| N | -1.36676000 | 0.39838100  | -0.42221100 |
| O | -1.48012400 | 1.54648900  | -0.98097600 |
| C | -2.57253800 | -0.17336700 | 0.27027800  |
| C | -3.33550400 | 0.98560700  | 0.92362900  |
| C | -3.45673700 | -0.86523500 | -0.78598600 |
| C | -2.13316100 | -1.17162500 | 1.35260800  |
| C | -0.25197300 | -0.45007300 | -0.87749100 |
| C | 1.04319600  | -0.27722800 | -0.06346300 |
| C | 2.09629300  | -1.29813900 | -0.53300500 |
| C | 1.60532500  | 1.15220900  | -0.14058000 |
| C | 3.41539800  | -1.16217800 | 0.24177400  |
| C | 2.91914100  | 1.28965200  | 0.64237500  |
| C | 3.96599500  | 0.26893500  | 0.17663500  |
| H | -2.70647800 | 1.50307300  | 1.65177200  |
| H | -3.65706500 | 1.71226200  | 0.17942900  |
| H | -4.21358500 | 0.59116200  | 1.44132800  |
| H | -2.93726500 | -1.70346700 | -1.25868600 |
| H | -4.36746500 | -1.25465300 | -0.32244000 |
| H | -3.74145600 | -0.15214600 | -1.56252500 |
| H | -3.01715100 | -1.54211100 | 1.87769900  |
| H | -1.61310500 | -2.03936600 | 0.94159500  |
| H | -1.48175300 | -0.69295800 | 2.08773800  |
| H | -0.07330900 | -0.18309200 | -1.92293400 |
| H | -0.56556100 | -1.49647300 | -0.84886100 |
| H | 0.81086200  | -0.49551600 | 0.98792900  |
| H | 2.28819600  | -1.14478000 | -1.60392000 |
| H | 1.70489900  | -2.31710000 | -0.43004600 |
| H | 1.78110400  | 1.40548900  | -1.19462900 |
| H | 0.86442700  | 1.86828700  | 0.22224700  |
| H | 4.15219700  | -1.87204300 | -0.14845900 |
| H | 3.24555600  | -1.43624000 | 1.29127100  |
| H | 3.30887200  | 2.30738500  | 0.53806800  |
| H | 2.72197400  | 1.14225100  | 1.71269000  |
| H | 4.87561300  | 0.35110600  | 0.78068900  |

H 4.25618800 0.49701700 -0.85730700

**Entry 72**

C -1.48929200 -1.00918900 -1.23433800  
C -1.38443500 -0.00389600 -0.04031300  
C 1.23497200 -0.06663600 -0.23048200  
C 0.96064700 -0.77187500 -1.58758300  
C -0.19136000 -1.76997500 -1.51325500  
C 2.26967800 -0.89088300 0.58961800  
C 3.70307500 -0.95416800 0.04743900  
C -2.41353200 -0.39346600 1.05620800  
C -2.18238800 -1.74381000 1.74154100  
N -0.02818500 -0.15433300 0.56592800  
C 1.77812200 1.36023600 -0.54684300  
C 2.32201100 2.23611000 0.59000100  
C -1.66607300 1.45070700 -0.51669100  
C -3.10648200 1.75722200 -0.95073800  
O 0.06822700 0.72276400 1.70510200  
H -2.30808000 -1.71202200 -1.06075700  
H -1.75579000 -0.45180800 -2.13796700  
H 0.71601600 -0.01884400 -2.34603300  
H 1.87881300 -1.25485000 -1.92877700  
H -0.28129200 -2.31309000 -2.45980100  
H -0.00298600 -2.51587000 -0.73570100  
H 1.87217900 -1.90687600 0.68145800  
H 2.29815100 -0.48323800 1.60361200  
H 3.75117800 -1.37241200 -0.96179400  
H 4.18257900 0.02700300 0.02165200  
H 4.31320900 -1.59694700 0.68858500  
H -3.40143200 -0.40558200 0.58691600  
H -2.44297700 0.39880500 1.80985300  
H -2.18335100 -2.57145200 1.02670300  
H -1.22651300 -1.78026600 2.26923600  
H -2.97631400 -1.93900200 2.46835200  
H 2.58024100 1.21291400 -1.28053700  
H 1.00234300 1.91488000 -1.07915900  
H 2.80214900 3.12465700 0.16728200  
H 1.53158300 2.55974800 1.26432900  
H 3.07362700 1.71668400 1.18984900  
H -1.00382000 1.66494900 -1.35995400  
H -1.38165900 2.13143800 0.29039700  
H -3.46491700 1.06006400 -1.71455200  
H -3.80685500 1.72242900 -0.11340600  
H -3.16271000 2.76271600 -1.37765200  
H 0.03844100 0.12192600 2.45816500

**72-radical**

|   |             |             |             |
|---|-------------|-------------|-------------|
| C | -1.41691300 | -1.27490200 | -1.26830300 |
| C | -1.49385100 | -0.09123100 | -0.25742000 |
| C | 1.20154300  | -0.09824900 | -0.22817100 |
| C | 1.04729200  | -1.06877100 | -1.42066000 |
| C | -0.10316000 | -2.05188800 | -1.22683300 |
| C | 2.04716600  | -0.75235000 | 0.89902900  |
| C | 3.52734800  | -0.99058700 | 0.58180100  |
| C | -2.49186300 | -0.42489200 | 0.87884100  |
| C | -2.16166700 | -1.66820200 | 1.70883800  |
| O | -0.16283400 | 0.83284300  | 1.47739600  |
| N | -0.15232700 | 0.17200400  | 0.37765600  |
| C | 1.83012000  | 1.22492500  | -0.74730700 |
| C | 2.20592900  | 2.29914800  | 0.27760200  |
| C | -1.96352600 | 1.17652900  | -1.03137600 |
| C | -2.15967500 | 2.46976900  | -0.23652800 |
| H | -2.26707200 | -1.94048300 | -1.09836000 |
| H | -1.53782900 | -0.88145100 | -2.28295800 |
| H | 0.86807600  | -0.49924100 | -2.34017600 |
| H | 1.99542400  | -1.59014300 | -1.56865500 |
| H | -0.09697700 | -2.80425900 | -2.02159900 |
| H | 0.00637900  | -2.59187500 | -0.28125700 |
| H | 1.57700900  | -1.70675100 | 1.15956200  |
| H | 1.95845400  | -0.12254400 | 1.78464200  |
| H | 4.00994800  | -1.47767600 | 1.43362200  |
| H | 3.67673600  | -1.64094300 | -0.28464600 |
| H | 4.06641200  | -0.05902500 | 0.39442400  |
| H | -3.47139900 | -0.54696500 | 0.40170700  |
| H | -2.56334100 | 0.43107600  | 1.54847800  |
| H | -2.93268700 | -1.82666400 | 2.46790000  |
| H | -2.11281900 | -2.57666600 | 1.10187300  |
| H | -1.20834600 | -1.54838100 | 2.22697400  |
| H | 2.72312300  | 0.94423100  | -1.31842700 |
| H | 1.13660500  | 1.65236900  | -1.47943700 |
| H | 2.95331300  | 1.94298200  | 0.99054900  |
| H | 2.63146400  | 3.16526100  | -0.23849800 |
| H | 1.34034000  | 2.62899500  | 0.85125300  |
| H | -2.90595000 | 0.90896300  | -1.52544700 |
| H | -1.24543100 | 1.35448400  | -1.83978200 |
| H | -2.43345300 | 3.28096400  | -0.91788400 |
| H | -2.95899900 | 2.38032300  | 0.50221500  |
| H | -1.25248100 | 2.76086400  | 0.29408600  |

**Entry 73**

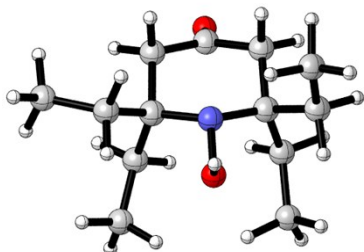

|   |            |            |            |
|---|------------|------------|------------|
| C | 1.4041955  | 1.8450107  | -0.2414719 |
| C | 1.4764555  | 0.2994617  | -0.1144439 |
| C | -1.1370825 | 0.2612117  | 0.1392431  |
| C | -1.1108755 | 1.8050427  | -0.0503389 |
| C | 0.0888465  | 2.3007497  | -0.8254959 |
| C | -2.0843575 | -0.0653333 | 1.3259951  |
| C | -3.5412205 | 0.3878287  | 1.1753261  |
| C | 2.6874075  | -0.0791963 | 0.7821031  |
| C | 2.6541545  | 0.4016797  | 2.2361241  |
| N | 0.2346455  | -0.1243303 | 0.5956331  |
| C | -1.6546735 | -0.3893093 | -1.1812789 |
| C | -2.0315955 | -1.8770753 | -1.1579959 |
| C | 1.7339965  | -0.2593573 | -1.5505899 |
| C | 1.8147855  | -1.7762023 | -1.7585099 |
| O | 0.0001585  | 3.0110257  | -1.8047709 |
| O | 0.2847115  | -1.5476963 | 0.8152551  |
| H | 1.4863135  | 2.2937317  | 0.7529461  |
| H | 2.2263595  | 2.2121147  | -0.8568509 |
| H | -2.0189035 | 2.1477377  | -0.5444169 |
| H | -1.0606585 | 2.2730167  | 0.9402831  |
| H | -1.6503825 | 0.3992547  | 2.2178901  |
| H | -2.0656195 | -1.1434983 | 1.4960251  |
| H | -4.1086995 | 0.1085227  | 2.0672381  |
| H | -3.6310985 | 1.4712907  | 1.0625671  |
| H | -4.0342685 | -0.0786973 | 0.3189711  |
| H | 3.5842505  | 0.3153627  | 0.2920381  |
| H | 2.7894895  | -1.1657143 | 0.7728631  |
| H | 3.5166845  | 0.0054547  | 2.7791801  |
| H | 2.6966775  | 1.4907637  | 2.3189261  |
| H | 1.7493845  | 0.0724937  | 2.7523791  |
| H | -2.5429655 | 0.1769807  | -1.4804229 |
| H | -0.9283525 | -0.2123703 | -1.9757909 |
| H | -2.8541605 | -2.0768793 | -0.4665149 |
| H | -2.3660895 | -2.1833063 | -2.1536409 |
| H | -1.1971315 | -2.5121353 | -0.8667489 |
| H | 2.6874725  | 0.1788377  | -1.8686719 |
| H | 0.9941005  | 0.1572867  | -2.2384429 |
| H | 2.5924155  | -2.2360983 | -1.1448019 |
| H | 0.8767255  | -2.2770483 | -1.5269049 |

|   |           |            |            |
|---|-----------|------------|------------|
| H | 2.0606965 | -1.9835583 | -2.8044079 |
| H | 0.3782075 | -1.6270533 | 1.7715231  |

### 73-radical

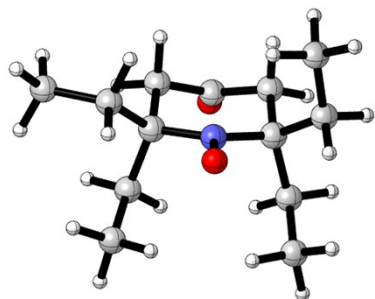

|   |            |            |            |
|---|------------|------------|------------|
| C | 1.4116187  | 1.7912078  | -0.2793941 |
| C | 1.5142417  | 0.2528888  | -0.1140921 |
| C | -1.1628393 | 0.2354498  | 0.1258630  |
| C | -1.0945973 | 1.7740428  | -0.0588210 |
| C | 0.0945377  | 2.2249808  | -0.8748970 |
| C | -2.0405263 | -0.0948732 | 1.3580370  |
| C | -3.4944733 | 0.3811678  | 1.2732660  |
| C | 2.6445107  | -0.0967472 | 0.8837120  |
| C | 2.4661517  | 0.3916168  | 2.3239670  |
| O | 0.2826417  | -1.4605622 | 0.9609049  |
| N | 0.2198267  | -0.2962032 | 0.4283590  |
| C | -1.7217783 | -0.4009602 | -1.1793680 |
| C | -2.0083373 | -1.9050332 | -1.1457610 |
| C | 1.8398577  | -0.3499642 | -1.5147530 |
| C | 1.9695807  | -1.8718942 | -1.6197891 |
| O | -0.0010793 | 2.8802728  | -1.8902280 |
| H | 1.4923837  | 2.2715488  | 0.7004890  |
| H | 2.2319227  | 2.1494998  | -0.9023720 |
| H | -2.0089073 | 2.1373028  | -0.5267680 |
| H | -1.0055273 | 2.2425218  | 0.9286530  |
| H | -1.5596363 | 0.3553158  | 2.2329709  |
| H | -2.0112563 | -1.1714172 | 1.5213679  |
| H | -3.5774493 | 1.4654968  | 1.1599330  |
| H | -4.0340353 | -0.0838272 | 0.4442760  |
| H | -4.0211623 | 0.1118808  | 2.1924309  |
| H | 3.5677687  | 0.3179418  | 0.4629930  |
| H | 2.7604387  | -1.1797842 | 0.9003920  |
| H | 1.5596957  | -0.0212992 | 2.7697079  |
| H | 3.3130037  | 0.0607308  | 2.9311060  |
| H | 2.4261937  | 1.4817338  | 2.4026260  |
| H | -2.6466393 | 0.1315898  | -1.4235981 |
| H | -1.0354653 | -0.1736432 | -1.9994811 |
| H | -2.8217813 | -2.1458442 | -0.4571970 |



|   |            |            |            |
|---|------------|------------|------------|
| H | -2.3096483 | -2.2452872 | -2.1404091 |
| H | -1.1371143 | -2.4818492 | -0.8358760 |
| H | 2.7827017  | 0.1098728  | -1.8322330 |
| H | 1.0905817  | 0.0013058  | -2.2299811 |
| H | 1.0704847  | -2.3852422 | -1.2799980 |
| H | 2.1465227  | -2.1500512 | -2.6626831 |
| H | 2.8075887  | -2.2538862 | -1.0333541 |

#### Entry 74

|   |             |             |             |
|---|-------------|-------------|-------------|
| C | -1.15358900 | 0.14445500  | 0.19689200  |
| C | 1.32036900  | 0.04548300  | 0.02827600  |
| C | 0.90664600  | 0.36856000  | 1.49186600  |
| C | -0.55359500 | 0.85904600  | 1.42764700  |
| C | 2.35739800  | 1.04264200  | -0.54721600 |
| C | 1.86473100  | -1.40021300 | -0.11556500 |
| C | -1.60825600 | -1.28848500 | 0.60373900  |
| C | -2.30128200 | 0.94696600  | -0.45133500 |
| N | 0.02812500  | 0.25134100  | -0.69873800 |
| C | -2.20187400 | -2.19740700 | -0.48081300 |
| C | 1.96543900  | 2.52172100  | -0.50569400 |
| C | -3.57095200 | 1.10117500  | 0.39397000  |
| C | 3.14197100  | -1.70939800 | 0.67708200  |
| O | -0.07282300 | -0.55790300 | -1.87705800 |
| H | 0.97148500  | -0.53539900 | 2.10134900  |
| H | 1.56467400  | 1.10656700  | 1.95433300  |
| H | -1.10448300 | 0.63607900  | 2.34325700  |
| H | -0.58869200 | 1.94053200  | 1.27234100  |
| H | 2.55267000  | 0.75184400  | -1.58687900 |
| H | 3.30335900  | 0.90940400  | -0.01321900 |
| H | 1.08254700  | -2.09943400 | 0.19058800  |
| H | 2.04073400  | -1.59625600 | -1.17579800 |
| H | -2.35442600 | -1.16265000 | 1.39661000  |
| H | -0.77075500 | -1.80426500 | 1.08061800  |
| H | -2.55808100 | 0.47997900  | -1.40749300 |
| H | -1.90085900 | 1.93720900  | -0.69148600 |
| H | -1.47612000 | -2.42528000 | -1.26001400 |
| H | -2.53531200 | -3.13821900 | -0.03171400 |
| H | -3.07204900 | -1.74281700 | -0.96220400 |
| H | 1.02653400  | 2.69442600  | -1.03494900 |
| H | 1.84462200  | 2.88521000  | 0.51929100  |
| H | 2.74060800  | 3.13408200  | -0.97541300 |
| H | -4.29328200 | 1.74077600  | -0.12088800 |
| H | -4.06223600 | 0.14310900  | 0.58211900  |
| H | -3.35927100 | 1.56284100  | 1.36297400  |
| H | 3.39244400  | -2.76984400 | 0.58200000  |
| H | 4.00254500  | -1.14243300 | 0.31476200  |

|   |             |             |             |
|---|-------------|-------------|-------------|
| H | 3.02998700  | -1.49764900 | 1.74476900  |
| H | -0.09298100 | 0.08875100  | -2.59041700 |

**74-radical**

|   |             |             |             |
|---|-------------|-------------|-------------|
| C | -1.13694600 | -0.17358300 | 0.30291500  |
| C | 1.37373800  | 0.03069800  | 0.07227300  |
| C | 0.94238000  | 0.38764400  | 1.50680200  |
| C | -0.44655500 | -0.25323200 | 1.68411400  |
| C | 2.23579900  | 1.10165000  | -0.62748200 |
| C | 2.06064400  | -1.36026600 | -0.01075600 |
| C | -1.95766400 | -1.45702100 | 0.02517900  |
| C | -1.96494900 | 1.12314300  | 0.12651900  |
| N | 0.04811800  | -0.08859100 | -0.60569300 |
| O | -0.05076600 | -0.12654600 | -1.87471700 |
| C | -2.75270400 | -1.52290300 | -1.28360100 |
| C | 1.58535400  | 2.47200800  | -0.83694700 |
| C | -3.25972800 | 1.19780900  | 0.94279400  |
| C | 3.48377900  | -1.44495600 | 0.55245600  |
| H | 1.65640500  | 0.02801100  | 2.24995300  |
| H | 0.87617800  | 1.47160600  | 1.62266500  |
| H | -0.34492100 | -1.30012900 | 1.98352400  |
| H | -1.03113800 | 0.24426300  | 2.45960400  |
| H | 2.53237700  | 0.70184000  | -1.60172800 |
| H | 3.15355100  | 1.21948600  | -0.04286900 |
| H | 1.42713300  | -2.08774100 | 0.50773000  |
| H | 2.06380600  | -1.65184700 | -1.06556400 |
| H | -2.63999000 | -1.58979000 | 0.87303400  |
| H | -1.26216800 | -2.30210500 | 0.06492400  |
| H | -2.18876800 | 1.23118400  | -0.93814100 |
| H | -1.32477500 | 1.97205700  | 0.38859600  |
| H | -3.26455600 | -2.48722500 | -1.35478300 |
| H | -3.51753100 | -0.74407100 | -1.33958000 |
| H | -2.09841000 | -1.41239300 | -2.14773500 |
| H | 0.69592900  | 2.39338600  | -1.46414300 |
| H | 1.30315200  | 2.95063000  | 0.10508600  |
| H | 2.28824700  | 3.14246600  | -1.33901600 |
| H | -3.74214900 | 2.16743800  | 0.79189500  |
| H | -3.97712000 | 0.42778300  | 0.65004700  |
| H | -3.07763400 | 1.09072200  | 2.01613400  |
| H | 4.18886700  | -0.83838900 | -0.02003400 |
| H | 3.53504400  | -1.12209300 | 1.59676900  |
| H | 3.83887600  | -2.47853100 | 0.51561500  |

**Entry 75**

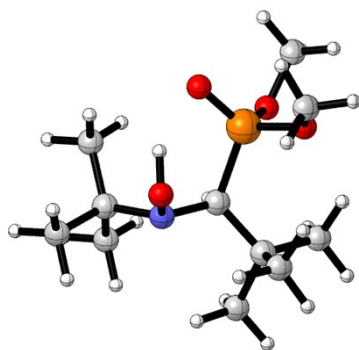

|   |            |            |            |
|---|------------|------------|------------|
| N | 0.9388165  | -0.4063829 | 0.8254985  |
| C | 0.7845925  | -0.2750059 | 2.3135405  |
| C | 2.1581785  | -0.6138029 | 2.9218475  |
| C | 0.3312905  | 1.1163081  | 2.8005925  |
| C | -0.2235985 | -1.3313469 | 2.7994915  |
| C | -0.2214085 | -0.3150009 | -0.0697685 |
| C | -0.2350505 | -1.4662449 | -1.1484725 |
| P | -0.4938685 | 1.4297891  | -0.7093635 |
| O | 0.2565355  | 2.4864171  | 0.0350575  |
| O | -2.1029435 | 1.5235311  | -0.6336035 |
| O | -0.2328405 | 1.5398081  | -2.3080525 |
| C | -2.7965315 | 2.7115391  | -1.0683325 |
| C | 0.9137415  | 2.2423781  | -2.8354865 |
| C | -1.5074075 | -1.3787859 | -2.0162775 |
| C | -0.2687115 | -2.8120199 | -0.3963145 |
| C | 1.0182075  | -1.4472469 | -2.0412565 |
| O | 2.0340885  | 0.3691471  | 0.3375315  |
| H | 2.0823365  | -0.6293219 | 4.0122575  |
| H | 2.4945765  | -1.5954519 | 2.5802095  |
| H | 2.9125975  | 0.1190141  | 2.6380255  |
| H | 0.3079905  | 1.1253981  | 3.8943185  |
| H | 1.0049135  | 1.9082941  | 2.4721775  |
| H | -0.6705305 | 1.3668061  | 2.4441895  |
| H | -0.2475645 | -1.3167779 | 3.8917395  |
| H | -1.2425245 | -1.1350589 | 2.4567335  |
| H | 0.0660225  | -2.3326639 | 2.4783675  |
| H | -1.1187545 | -0.4636559 | 0.5354215  |
| H | -3.8483345 | 2.5477731  | -0.8418625 |
| H | -2.4313855 | 3.5861691  | -0.5263725 |
| H | -2.6658565 | 2.8514621  | -2.1432325 |
| H | 0.7146765  | 2.3838301  | -3.8967005 |
| H | 1.0349235  | 3.2049531  | -2.3388305 |
| H | 1.8183495  | 1.6450511  | -2.7045245 |
| H | -2.4125875 | -1.3745409 | -1.4016025 |
| H | -1.5564435 | -2.2524539 | -2.6726985 |
| H | -1.5198665 | -0.4906459 | -2.6487075 |
| H | -1.1569005 | -2.8979129 | 0.2372455  |

|   |            |            |            |
|---|------------|------------|------------|
| H | 0.6168305  | -2.9342089 | 0.2278525  |
| H | -0.2963045 | -3.6332149 | -1.1182225 |
| H | 1.0123475  | -2.3262249 | -2.6933005 |
| H | 1.9288015  | -1.4713029 | -1.4412905 |
| H | 1.0474995  | -0.5649279 | -2.6813295 |
| H | 1.7720955  | 1.3065321  | 0.4335055  |

### 75-radical

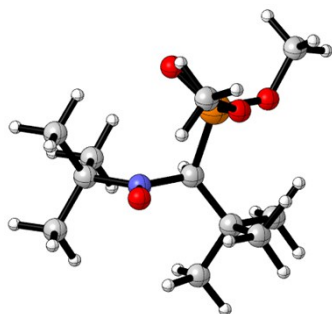

|   |            |            |            |
|---|------------|------------|------------|
| N | 0.9966227  | -0.3861889 | 0.3809191  |
| O | 0.8546537  | -0.7387139 | 1.6035761  |
| C | 2.1722937  | -0.9858709 | -0.3648439 |
| C | 3.4498277  | -0.4852909 | 0.3308851  |
| C | 2.0647437  | -2.5172229 | -0.2502889 |
| C | 2.1733137  | -0.5751329 | -1.8409599 |
| C | -0.0770583 | 0.4356981  | -0.2104479 |
| C | -0.2921243 | 1.8158951  | 0.5221331  |
| P | -1.5084823 | -0.7298109 | -0.5036239 |
| O | -1.0820733 | -1.9501069 | -1.2394769 |
| O | -2.5589533 | 0.2191041  | -1.2739939 |
| O | -2.3105463 | -1.0355269 | 0.8615451  |
| C | -3.7725133 | -0.3387239 | -1.8218709 |
| C | -2.0412403 | -2.1993129 | 1.6784651  |
| C | -1.0500603 | 2.7693661  | -0.4257119 |
| C | 1.0968287  | 2.4301651  | 0.7983751  |
| C | -1.0590123 | 1.7050821  | 1.8526911  |
| H | 4.3223857  | -0.9753599 | -0.1085079 |
| H | 3.5692857  | 0.5946451  | 0.2143751  |
| H | 3.4184987  | -0.7205699 | 1.3954691  |
| H | 2.9237957  | -2.9789109 | -0.7446239 |
| H | 2.0638687  | -2.8190319 | 0.7977431  |
| H | 1.1477727  | -2.8709279 | -0.7236469 |
| H | 3.0418007  | -1.0316079 | -2.3215789 |
| H | 1.2820727  | -0.9347349 | -2.3589809 |
| H | 2.2642857  | 0.5066951  | -1.9715819 |
| H | 0.2290517  | 0.6714981  | -1.2292569 |
| H | -4.2496563 | 0.4647741  | -2.3799229 |
| H | -3.5402603 | -1.1710539 | -2.4885649 |
| H | -4.4296313 | -0.6729289 | -1.0165249 |

|   |            |            |            |
|---|------------|------------|------------|
| H | -1.1554093 | -2.0198679 | 2.2874431  |
| H | -2.9197143 | -2.3298169 | 2.3085911  |
| H | -1.8961993 | -3.0774029 | 1.0478111  |
| H | -2.0524373 | 2.4100581  | -0.6534809 |
| H | -0.5144653 | 2.9024941  | -1.3716619 |
| H | -1.1365553 | 3.7519911  | 0.0464901  |
| H | 1.6884167  | 2.5216561  | -0.1182679 |
| H | 1.6631127  | 1.8408461  | 1.5202591  |
| H | 0.9707097  | 3.4357611  | 1.2090911  |
| H | -0.5526403 | 1.0308651  | 2.5432161  |
| H | -2.0768773 | 1.3412431  | 1.7055671  |
| H | -1.1174323 | 2.6962781  | 2.3131741  |

**Entry 76**

|   |             |             |             |
|---|-------------|-------------|-------------|
| N | -0.76590900 | -0.45750900 | -0.48542600 |
| C | -2.14638500 | 0.02433500  | -0.23874200 |
| C | -3.04163400 | -0.42362300 | -1.40823300 |
| C | -2.78306000 | -0.39036100 | 1.10499700  |
| C | -4.47343500 | 0.11389700  | -1.27734200 |
| C | -4.20524700 | 0.17761900  | 1.23761100  |
| C | -5.10123600 | -0.26003000 | 0.07180300  |
| C | 0.39005800  | 0.39933800  | -0.09531400 |
| C | 0.43700400  | 1.56674800  | -1.12469900 |
| C | 0.34694500  | 0.94616100  | 1.35387100  |
| C | 1.37606900  | 2.73787300  | -0.78261000 |
| C | 1.39451100  | 2.03042600  | 1.64586200  |
| C | 1.23956900  | 3.20468900  | 0.67201800  |
| P | 1.86413800  | -0.76160500 | -0.35223500 |
| O | 1.70996200  | -1.80643500 | -1.40450800 |
| O | 2.29970700  | -1.35753500 | 1.09460800  |
| O | 3.07915200  | 0.27201500  | -0.60523700 |
| C | 2.00934200  | -2.70862800 | 1.49980100  |
| C | 4.40039700  | -0.23078900 | -0.88693300 |
| O | -0.63043600 | -1.76463800 | 0.11702000  |
| H | -2.09554200 | 1.11770000  | -0.26100700 |
| H | -3.05634000 | -1.51984500 | -1.43109700 |
| H | -2.58913100 | -0.09525800 | -2.34783000 |
| H | -2.81942800 | -1.48162700 | 1.15195500  |
| H | -2.16816000 | -0.06359800 | 1.94618100  |
| H | -5.08850900 | -0.26065600 | -2.10200500 |
| H | -4.45949900 | 1.20787700  | -1.37597400 |
| H | -4.63966200 | -0.14213200 | 2.19052600  |
| H | -4.16404100 | 1.27484300  | 1.27020100  |
| H | -6.09576700 | 0.18847000  | 0.16629000  |
| H | -5.24247000 | -1.34761300 | 0.11621800  |
| H | -0.58138000 | 1.96164900  | -1.19033400 |

|   |             |             |             |
|---|-------------|-------------|-------------|
| H | 0.66424100  | 1.16398700  | -2.11494700 |
| H | -0.64018000 | 1.39873000  | 1.49258800  |
| H | 0.42630200  | 0.12261300  | 2.06523300  |
| H | 1.15145000  | 3.56428300  | -1.46529500 |
| H | 2.40940300  | 2.44519500  | -0.96877300 |
| H | 1.27047500  | 2.37311700  | 2.67833600  |
| H | 2.40422900  | 1.61588200  | 1.57145800  |
| H | 1.98334200  | 3.97935200  | 0.88458300  |
| H | 0.25508300  | 3.66780600  | 0.82397000  |
| H | 0.97562000  | -2.78341200 | 1.83987000  |
| H | 2.17838200  | -3.39968900 | 0.67235000  |
| H | 2.69353000  | -2.93165800 | 2.31785600  |
| H | 5.00222100  | 0.63388900  | -1.16197700 |
| H | 4.81961600  | -0.70541100 | 0.00295500  |
| H | 4.36927200  | -0.94203300 | -1.71427300 |
| H | -0.28823800 | -2.28901100 | -0.62313900 |

#### 76-radical

|   |             |             |             |
|---|-------------|-------------|-------------|
| N | -0.77531100 | -0.44255800 | -0.01549700 |
| O | -0.63379200 | -1.70726600 | 0.13808500  |
| C | -2.15806200 | 0.08936200  | -0.01290000 |
| C | -2.86337400 | -0.28061800 | -1.33001100 |
| C | -2.94291300 | -0.42829800 | 1.20477000  |
| C | -4.31880200 | 0.20758300  | -1.34488200 |
| C | -4.39561600 | 0.06972200  | 1.18111700  |
| C | -5.10187200 | -0.30391900 | -0.12874200 |
| C | 0.44688400  | 0.41039100  | 0.02742600  |
| C | 0.37623600  | 1.48841600  | -1.09158600 |
| C | 0.55250100  | 1.05113000  | 1.44027500  |
| C | 1.35616500  | 2.66210900  | -0.92916700 |
| C | 1.53318300  | 2.22792100  | 1.55557900  |
| C | 1.27869000  | 3.28106400  | 0.47125700  |
| P | 1.84715000  | -0.79778100 | -0.36517500 |
| O | 1.77719000  | -1.46888800 | -1.68620400 |
| O | 2.13238300  | -1.75723600 | 0.90305200  |
| O | 3.09718200  | 0.22562600  | -0.20148400 |
| C | 1.76835300  | -3.15440000 | 0.92198500  |
| C | 4.43192600  | -0.23788300 | -0.47864200 |
| H | -2.08350400 | 1.17762900  | 0.06006600  |
| H | -2.82747700 | -1.36992100 | -1.43388600 |
| H | -2.30867600 | 0.13618100  | -2.17553800 |
| H | -2.91862300 | -1.52122600 | 1.18659900  |
| H | -2.44410500 | -0.11388700 | 2.12674600  |
| H | -4.80241400 | -0.11206200 | -2.27316300 |
| H | -4.33674300 | 1.30574500  | -1.34985000 |
| H | -4.93663800 | -0.34450300 | 2.03769800  |

|   |             |             |             |
|---|-------------|-------------|-------------|
| H | -4.41409300 | 1.16108700  | 1.30326100  |
| H | -6.12004900 | 0.09811500  | -0.13756100 |
| H | -5.19460800 | -1.39545800 | -0.19086700 |
| H | -0.63616000 | 1.90280700  | -1.08241500 |
| H | 0.50424300  | 1.00342900  | -2.06270300 |
| H | -0.44955100 | 1.42150700  | 1.68747400  |
| H | 0.78546800  | 0.27174000  | 2.17001600  |
| H | 1.11705600  | 3.41279200  | -1.68946600 |
| H | 2.37626000  | 2.32644900  | -1.12275700 |
| H | 1.42245600  | 2.67240700  | 2.55019800  |
| H | 2.55939000  | 1.86435000  | 1.47865500  |
| H | 2.00388700  | 4.09593700  | 0.56139800  |
| H | 0.28687200  | 3.72967400  | 0.62117300  |
| H | 0.77445100  | -3.26512900 | 1.35185300  |
| H | 1.78031900  | -3.56475400 | -0.08817900 |
| H | 2.51485300  | -3.65100900 | 1.54189500  |
| H | 4.48210800  | -0.68870600 | -1.47187200 |
| H | 5.07641700  | 0.63911800  | -0.43690500 |
| H | 4.74531200  | -0.96106200 | 0.27777200  |

### Entry 77

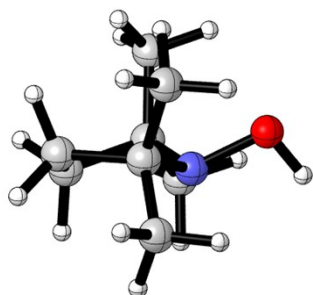

|   |            |            |            |
|---|------------|------------|------------|
| C | 1.2374328  | 0.0804471  | -0.0951200 |
| C | -1.2251412 | 0.0049901  | -0.0378630 |
| C | -0.7345802 | 1.4220071  | 0.3775330  |
| C | 0.7187638  | 1.5285061  | -0.1219270 |
| C | -1.8198212 | -0.7632539 | 1.1542580  |
| C | -2.2628332 | 0.0673281  | -1.1692050 |
| C | 2.3897088  | -0.1564779 | -1.0760670 |
| C | 1.6709318  | -0.3459889 | 1.3221410  |
| N | 0.0227998  | -0.6112469 | -0.6015240 |
| O | 0.0804908  | -2.0231329 | -0.3527260 |
| H | -1.3698702 | 2.2064351  | -0.0390510 |
| H | -0.7731622 | 1.5240551  | 1.4647970  |
| H | 0.7465268  | 1.9050051  | -1.1481800 |
| H | 1.3298578  | 2.1924711  | 0.4936120  |
| H | -2.1615932 | -1.7546349 | 0.8537470  |
| H | -1.0986312 | -0.8901169 | 1.9629020  |

|   |            |            |            |
|---|------------|------------|------------|
| H | -2.6772852 | -0.2077369 | 1.5458420  |
| H | -2.4926712 | -0.9382689 | -1.5336440 |
| H | -3.1960672 | 0.5206641  | -0.8202530 |
| H | -1.8816172 | 0.6533451  | -2.0089240 |
| H | 3.2621658  | 0.4433771  | -0.8008890 |
| H | 2.6925538  | -1.2074409 | -1.0692790 |
| H | 2.0880198  | 0.1102181  | -2.0917000 |
| H | 2.6215568  | 0.1314301  | 1.5764790  |
| H | 0.9430388  | -0.0616619 | 2.0839400  |
| H | 1.8074768  | -1.4276909 | 1.3684450  |
| H | 0.0819498  | -2.4026289 | -1.2373430 |

### 77-radical

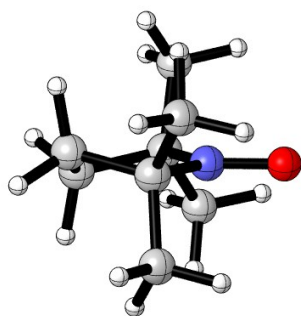

|   |            |            |            |
|---|------------|------------|------------|
| C | -1.2607992 | -0.0489240 | 0.0290559  |
| C | 1.2603598  | -0.0644160 | -0.0129241 |
| C | 0.7191938  | 1.3031780  | -0.4759661 |
| C | -0.7090272 | 1.3893770  | 0.0952439  |
| C | 2.1799118  | -0.7349780 | -1.0367831 |
| C | 1.9498258  | 0.0076210  | 1.3613489  |
| C | -2.1845082 | -0.4023240 | 1.1975489  |
| C | -1.9508302 | -0.3558250 | -1.3121611 |
| N | -0.0032222 | -0.8479200 | 0.1201909  |
| O | -0.0079942 | -2.1064690 | 0.2980959  |
| H | 1.3520998  | 2.1260410  | -0.1375711 |
| H | 0.6932048  | 1.3379570  | -1.5688151 |
| H | -0.6816222 | 1.7256420  | 1.1356199  |
| H | -1.3361662 | 2.0908050  | -0.4587231 |
| H | 2.4486058  | -1.7392460 | -0.7043621 |
| H | 1.6880968  | -0.8174380 | -2.0090331 |
| H | 3.0950758  | -0.1491190 | -1.1594331 |
| H | 2.1379868  | -1.0011220 | 1.7350409  |
| H | 2.9054288  | 0.5330680  | 1.2791299  |
| H | 1.3307678  | 0.5328190  | 2.0931259  |
| H | -3.0952082 | 0.2012630  | 1.1516529  |
| H | -2.4609042 | -1.4573940 | 1.1564369  |
| H | -1.6925572 | -0.2154240 | 2.1551519  |
| H | -2.1468562 | -1.4272150 | -1.3916011 |



|   |            |            |            |
|---|------------|------------|------------|
| H | -2.9023962 | 0.1788970  | -1.3801511 |
| H | -1.3284652 | -0.0588540 | -2.1601181 |

**Entry 78**

|   |             |             |             |
|---|-------------|-------------|-------------|
| C | -1.27949900 | -0.41271200 | 0.05654300  |
| C | -1.75714300 | 0.96006200  | -0.49290900 |
| C | -1.06651500 | 2.25085700  | -0.05025800 |
| C | 0.43151400  | 2.31186800  | -0.35261500 |
| C | 1.36083600  | -0.13745600 | 0.06611700  |
| C | 1.24035800  | 1.34026100  | 0.51405500  |
| C | -1.40409600 | -0.51178200 | 1.59068800  |
| C | -2.25250400 | -1.44642500 | -0.55385200 |
| C | 1.90537500  | -0.94232800 | 1.26990900  |
| C | 2.39063300  | -0.22262800 | -1.08110300 |
| N | 0.08564600  | -0.69478500 | -0.50889400 |
| H | -1.70268400 | 0.89337000  | -1.58500300 |
| H | -2.81968000 | 1.04613400  | -0.23917700 |
| H | -1.21819800 | 2.41520400  | 1.02388800  |
| H | -1.57350000 | 3.08231100  | -0.55347100 |
| H | 0.60944700  | 2.12723600  | -1.41777200 |
| H | 0.78780800  | 3.32837800  | -0.15310300 |
| H | 2.27151500  | 1.69942100  | 0.58804500  |
| H | 0.84646100  | 1.38321700  | 1.53472600  |
| H | -2.44954600 | -0.37651800 | 1.88535500  |
| H | -1.08796700 | -1.49933600 | 1.93373300  |
| H | -0.81749900 | 0.24062100  | 2.11700400  |
| H | -2.06398000 | -2.45058900 | -0.17780300 |
| H | -3.27689900 | -1.16813600 | -0.29499200 |
| H | -2.17501400 | -1.45981000 | -1.64475400 |
| H | 2.85117000  | -0.50035500 | 1.59730400  |
| H | 1.22086900  | -0.92430700 | 2.11881200  |
| H | 2.08934700  | -1.98102700 | 0.99880400  |
| H | 3.37155000  | 0.12124000  | -0.74091800 |
| H | 2.49874300  | -1.25244300 | -1.42533200 |
| H | 2.08120400  | 0.39228000  | -1.92915000 |
| O | 0.29257900  | -2.13157300 | -0.54863500 |
| H | 0.20294500  | -2.33911800 | -1.48430800 |

**78-radical**

|   |             |             |             |
|---|-------------|-------------|-------------|
| C | -1.33050000 | -0.38962600 | 0.06727700  |
| C | -1.64910200 | 0.96601000  | -0.61542100 |
| C | -0.96325300 | 2.23850000  | -0.11309500 |
| C | 0.55679100  | 2.26506200  | -0.28126200 |
| C | 1.38196200  | -0.22538700 | 0.08515900  |
| C | 1.29429500  | 1.23444700  | 0.58291500  |
| C | -1.51100400 | -0.34870700 | 1.59845800  |

|   |             |             |             |
|---|-------------|-------------|-------------|
| C | -2.32077200 | -1.42246800 | -0.49787000 |
| C | 2.00589000  | -1.08826600 | 1.20128700  |
| C | 2.27711200  | -0.29486200 | -1.16845800 |
| N | 0.06087600  | -0.85766300 | -0.29717500 |
| O | 0.17493400  | -2.04572300 | -0.76659100 |
| H | -1.44709900 | 0.84572900  | -1.68612100 |
| H | -2.73122000 | 1.10962000  | -0.52457800 |
| H | -1.21296100 | 2.40922100  | 0.94110100  |
| H | -1.39493000 | 3.08368400  | -0.66089100 |
| H | 0.81557600  | 2.13532100  | -1.33790100 |
| H | 0.91888800  | 3.26087300  | -0.00372900 |
| H | 2.33689200  | 1.55130900  | 0.68858900  |
| H | 0.88383500  | 1.26227300  | 1.59672200  |
| H | -2.53650900 | -0.05181800 | 1.83745100  |
| H | -1.34097200 | -1.34209100 | 2.01989300  |
| H | -0.84241500 | 0.35180700  | 2.09543900  |
| H | -2.14777900 | -2.41235500 | -0.07908300 |
| H | -3.33479400 | -1.10192100 | -0.24524100 |
| H | -2.23759400 | -1.50099100 | -1.58254700 |
| H | 3.00723000  | -0.72159500 | 1.44334000  |
| H | 1.40234700  | -1.05424500 | 2.11174000  |
| H | 2.08239300  | -2.12512900 | 0.87273200  |
| H | 3.27341900  | 0.08666300  | -0.93028500 |
| H | 2.36440800  | -1.32498400 | -1.51009200 |
| H | 1.86717300  | 0.29983500  | -1.98752000 |

### Entry 79

|   |             |             |             |
|---|-------------|-------------|-------------|
| C | 1.25842100  | 1.39952700  | -0.49804700 |
| C | 1.17334500  | -0.06281100 | -0.00212800 |
| C | -1.17334500 | -0.06281100 | -0.00212800 |
| C | -1.25842100 | 1.39952700  | -0.49804700 |
| C | 0.00000000  | 2.20542600  | -0.15991700 |
| C | 0.77470100  | -0.13088500 | 1.50218100  |
| C | -0.77470100 | -0.13088500 | 1.50218100  |
| N | 0.00000000  | -0.65744800 | -0.72038800 |
| C | 2.47234300  | -0.79385900 | -0.32734900 |
| C | -2.47234300 | -0.79385900 | -0.32734900 |
| H | 2.14501600  | 1.86925300  | -0.05943000 |
| H | 1.40774900  | 1.37559800  | -1.58257400 |
| H | -2.14501600 | 1.86925300  | -0.05943000 |
| H | -1.40774900 | 1.37559800  | -1.58257400 |
| H | 0.00000000  | 2.46073500  | 0.90513600  |
| H | 0.00000000  | 3.15738400  | -0.69964700 |
| H | 1.20070100  | 0.70293400  | 2.06629000  |
| H | 1.15852500  | -1.05245300 | 1.94350000  |
| H | -1.15852500 | -1.05245300 | 1.94350000  |

|   |             |             |             |
|---|-------------|-------------|-------------|
| H | -1.20070100 | 0.70293400  | 2.06629000  |
| H | 3.30485700  | -0.31169300 | 0.19309400  |
| H | 2.42824300  | -1.83619700 | -0.01282000 |
| H | 2.68023400  | -0.76003300 | -1.40083100 |
| H | -3.30485700 | -0.31169300 | 0.19309400  |
| H | -2.68023400 | -0.76003300 | -1.40083100 |
| H | -2.42824300 | -1.83619700 | -0.01282000 |
| O | 0.00000000  | -2.08552900 | -0.41305600 |
| H | 0.00000000  | -2.48279700 | -1.28917500 |

### 79-radical

|   |             |             |             |
|---|-------------|-------------|-------------|
| C | 1.27411400  | 1.30631300  | -0.59003900 |
| C | 1.20104100  | -0.09559700 | 0.05620000  |
| C | -1.20104100 | -0.09559700 | 0.05620000  |
| C | -1.27411400 | 1.30631300  | -0.59003900 |
| C | 0.00000000  | 2.13012100  | -0.34289000 |
| C | 0.77804300  | -0.01022100 | 1.55050400  |
| C | -0.77804300 | -0.01022100 | 1.55050400  |
| N | 0.00000000  | -0.76030000 | -0.55040500 |
| O | 0.00000000  | -2.00161400 | -0.84370700 |
| C | 2.46793800  | -0.89885800 | -0.18828200 |
| C | -2.46793800 | -0.89885800 | -0.18828200 |
| H | 2.14906200  | 1.83713500  | -0.19983800 |
| H | 1.43258600  | 1.17091400  | -1.66526800 |
| H | -2.14906200 | 1.83713500  | -0.19983800 |
| H | -1.43258600 | 1.17091500  | -1.66526800 |
| H | 0.00000000  | 2.49835900  | 0.68841100  |
| H | 0.00000000  | 3.01980000  | -0.97959000 |
| H | 1.19841200  | 0.87537600  | 2.03313100  |
| H | 1.15861600  | -0.88395700 | 2.08360900  |
| H | -1.15861600 | -0.88395600 | 2.08360900  |
| H | -1.19841100 | 0.87537600  | 2.03313100  |
| H | 3.30791900  | -0.41776900 | 0.32058600  |
| H | 2.36419500  | -1.91699000 | 0.18786700  |
| H | 2.69715200  | -0.95647700 | -1.25487800 |
| H | -3.30791900 | -0.41776800 | 0.32058400  |
| H | -2.69715100 | -0.95647900 | -1.25487800 |
| H | -2.36419600 | -1.91699000 | 0.18786900  |

### Entry 80

|   |             |             |             |
|---|-------------|-------------|-------------|
| C | -0.72210200 | 0.69753000  | 0.03436800  |
| C | -0.72210200 | -0.69753000 | 0.03436800  |
| C | -1.92048700 | -1.40429900 | 0.00176000  |
| C | -3.12399100 | -0.69804400 | -0.03518300 |
| C | -3.12399100 | 0.69804400  | -0.03518300 |

|   |             |             |             |
|---|-------------|-------------|-------------|
| C | -1.92048700 | 1.40429900  | 0.00176000  |
| C | 0.69474200  | -1.23756600 | 0.04891600  |
| C | 0.69474200  | 1.23756600  | 0.04891600  |
| N | 1.43025100  | 0.00000000  | 0.46241600  |
| C | 1.09730500  | 1.79061500  | -1.33531300 |
| C | 0.92230400  | 2.31571700  | 1.11889300  |
| C | 0.92230400  | -2.31571700 | 1.11889300  |
| C | 1.09730500  | -1.79061500 | -1.33531300 |
| O | 2.77774100  | 0.00000000  | -0.01905100 |
| H | -1.92761800 | -2.48917800 | 0.00614000  |
| H | -4.06464400 | -1.23685900 | -0.06075100 |
| H | -4.06464400 | 1.23685900  | -0.06075100 |
| H | -1.92761800 | 2.48917800  | 0.00614000  |
| H | 0.50895200  | 2.68588400  | -1.55366400 |
| H | 2.15491900  | 2.05877100  | -1.34563700 |
| H | 0.91763500  | 1.06983200  | -2.13320400 |
| H | 1.98111400  | 2.58734600  | 1.15745000  |
| H | 0.35532500  | 3.22283000  | 0.89102100  |
| H | 0.62023300  | 1.94877300  | 2.10122500  |
| H | 0.35532500  | -3.22283000 | 0.89102100  |
| H | 1.98111400  | -2.58734600 | 1.15745000  |
| H | 0.62023300  | -1.94877300 | 2.10122500  |
| H | 2.15491900  | -2.05877100 | -1.34563700 |
| H | 0.50895200  | -2.68588400 | -1.55366400 |
| H | 0.91763500  | -1.06983200 | -2.13320400 |
| H | 3.30123300  | 0.00000000  | 0.78903700  |

### 80-radical

|   |             |             |             |
|---|-------------|-------------|-------------|
| C | -0.00003800 | 0.68889900  | -0.69831900 |
| C | -0.00003800 | 0.68889900  | 0.69831900  |
| C | -0.00002600 | 1.88944200  | 1.40307400  |
| C | -0.00000200 | 3.09307100  | 0.69802000  |
| C | -0.00000200 | 3.09307100  | -0.69802000 |
| C | -0.00002600 | 1.88944200  | -1.40307400 |
| C | -0.00004400 | -0.71519500 | 1.26320300  |
| C | -0.00004400 | -0.71519500 | -1.26320300 |
| N | -0.00073800 | -1.51131900 | 0.00000000  |
| O | -0.00055100 | -2.78090100 | 0.00000000  |
| C | -1.26418500 | -1.04177500 | -2.07680300 |
| C | 1.26474300  | -1.04208700 | -2.07571500 |
| C | 1.26474300  | -1.04208700 | 2.07571500  |
| C | -1.26418500 | -1.04177500 | 2.07680300  |
| H | -0.00004800 | 1.89568700  | 2.48784000  |
| H | 0.00000100  | 4.03354000  | 1.23722800  |
| H | 0.00000100  | 4.03354000  | -1.23722800 |
| H | -0.00004800 | 1.89568700  | -2.48784000 |

|   |             |             |             |
|---|-------------|-------------|-------------|
| H | -1.27225300 | -0.47175500 | -3.00920800 |
| H | -1.28043800 | -2.10686900 | -2.31663200 |
| H | -2.16660900 | -0.79588600 | -1.51351200 |
| H | 1.28089900  | -2.10716000 | -2.31563900 |
| H | 1.27379900  | -0.47194800 | -3.00803700 |
| H | 2.16674600  | -0.79651500 | -1.51161000 |
| H | 1.27379900  | -0.47194800 | 3.00803700  |
| H | 1.28089900  | -2.10716000 | 2.31563900  |
| H | 2.16674600  | -0.79651500 | 1.51161000  |
| H | -1.28043800 | -2.10686900 | 2.31663200  |
| H | -1.27225300 | -0.47175500 | 3.00920800  |
| H | -2.16660900 | -0.79588600 | 1.51351200  |

### Entry 81

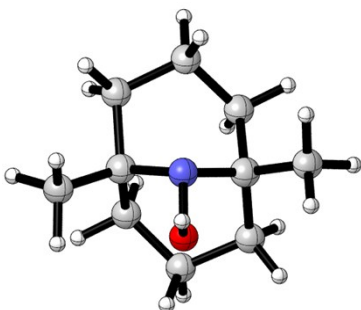

|   |            |            |            |
|---|------------|------------|------------|
| C | -0.0446823 | -1.9235745 | -1.0265873 |
| C | 1.3391257  | -1.3274045 | -0.6844303 |
| C | -1.3278963 | 1.5616865  | -0.2275303 |
| C | 1.2317527  | -0.0150295 | 0.1423447  |
| C | 0.0579047  | 2.2304415  | -0.3327533 |
| C | 1.1199857  | 1.2320135  | -0.7994213 |
| C | -1.1371223 | -0.8497495 | -1.1318363 |
| C | -1.2300203 | 0.0546555  | 0.1459337  |
| N | 0.0038617  | -0.0243075 | 0.9893577  |
| C | 2.4481597  | 0.1476585  | 1.0605437  |
| C | -2.4496323 | -0.3406665 | 0.9828747  |
| H | -0.3231473 | -2.6351185 | -0.2468833 |
| H | 0.0079397  | -2.4856225 | -1.9638143 |
| H | 1.9061327  | -1.1131435 | -1.5969263 |
| H | 1.9174207  | -2.0666795 | -0.1252893 |
| H | -1.9211793 | 2.0828245  | 0.5293027  |
| H | -1.8754343 | 1.6493465  | -1.1716623 |
| H | 0.3429087  | 2.6267645  | 0.6451597  |
| H | 0.0182267  | 3.0829915  | -1.0178393 |
| H | 2.0991877  | 1.7166505  | -0.8487973 |
| H | 0.8926497  | 0.9110155  | -1.8190943 |
| H | -2.1059483 | -1.3296775 | -1.3008093 |
| H | -0.9540323 | -0.2313015 | -2.0149423 |

|   |            |            |           |
|---|------------|------------|-----------|
| H | 3.3685617  | 0.1269335  | 0.4692887 |
| H | 2.4050657  | 1.0999995  | 1.5971857 |
| H | 2.4959537  | -0.6629875 | 1.7897077 |
| H | -2.4636303 | 0.2051895  | 1.9305497 |
| H | -3.3605483 | -0.0879385 | 0.4323287 |
| H | -2.4615503 | -1.4100655 | 1.1971207 |
| O | 0.0154327  | -1.2665785 | 1.7429017 |
| H | -0.0154463 | -0.9583265 | 2.6540177 |

### 81-radical

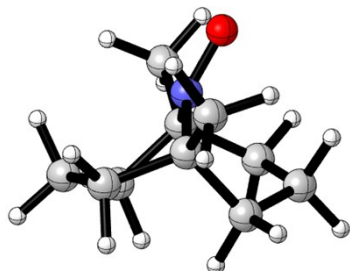

|   |            |            |            |
|---|------------|------------|------------|
| C | -0.0406800 | -1.9759236 | -0.8839269 |
| C | 1.3532020  | -1.3623916 | -0.6265889 |
| C | -1.3406950 | 1.5198694  | -0.1755859 |
| C | 1.2549220  | -0.0437916 | 0.1983951  |
| C | 0.0499990  | 2.1829414  | -0.2257389 |
| C | 1.1186490  | 1.2077654  | -0.7280839 |
| C | -1.1258180 | -0.9051476 | -1.0611509 |
| C | -1.2547720 | 0.0167674  | 0.2065811  |
| N | 0.0012540  | -0.1440776 | 1.0084461  |
| O | 0.0048550  | -0.8834916 | 2.0524151  |
| C | 2.4468410  | 0.1181954  | 1.1414381  |
| C | -2.4536110 | -0.4036906 | 1.0528291  |
| H | -0.3086520 | -2.6088156 | -0.0327759 |
| H | -0.0102830 | -2.6281076 | -1.7613369 |
| H | 1.8654000  | -1.1452866 | -1.5699089 |
| H | 1.9716590  | -2.0856926 | -0.0890069 |
| H | -1.9659040 | 2.0449074  | 0.5522041  |
| H | -1.8461320 | 1.6062104  | -1.1430229 |
| H | 0.3232030  | 2.5242734  | 0.7777171  |
| H | 0.0220330  | 3.0735314  | -0.8603159 |
| H | 2.0909090  | 1.7052504  | -0.7811819 |
| H | 0.8819630  | 0.9008824  | -1.7497469 |
| H | -2.0937900 | -1.3803386 | -1.2442569 |
| H | -0.9103290 | -0.3019336 | -1.9468119 |
| H | 3.3729080  | 0.0903064  | 0.5604341  |
| H | 2.4014820  | 1.0736404  | 1.6714551  |
| H | 2.4651400  | -0.6825696 | 1.8799931  |
| H | -2.4747490 | 0.1389884  | 1.9993081  |

|   |            |            |           |
|---|------------|------------|-----------|
| H | -3.3702360 | -0.1817956 | 0.4987651 |
| H | -2.4287670 | -1.4704766 | 1.2794591 |

### Entry 83

|   |             |             |             |
|---|-------------|-------------|-------------|
| C | -2.85772700 | 0.01169400  | 0.00971100  |
| C | -1.52509700 | 0.42014900  | 0.04547700  |
| C | -0.42805800 | -0.48418600 | 0.02177300  |
| C | -0.72036900 | -1.85995900 | 0.01037500  |
| C | -2.04340200 | -2.27952400 | -0.01346600 |
| C | -3.10297600 | -1.35412200 | -0.02343500 |
| N | -0.98462100 | 1.68482200  | 0.12773600  |
| C | 0.79276300  | 0.30595700  | 0.00810600  |
| C | 0.39480300  | 1.61766900  | 0.03130700  |
| O | -1.69656400 | 2.83530300  | -0.19644600 |
| C | 2.22884400  | -0.19616900 | -0.00751000 |
| C | 2.50906900  | -1.04220600 | 1.25647600  |
| C | 3.21793600  | 0.98412300  | -0.02775200 |
| C | 2.47406300  | -1.05291100 | -1.27166500 |
| H | -3.66403600 | 0.73475400  | -0.00288600 |
| H | 0.07310100  | -2.59676100 | 0.01179800  |
| H | -2.26589800 | -3.34037100 | -0.03036000 |
| H | -4.12542800 | -1.71249800 | -0.05776600 |
| H | 0.96455400  | 2.53161800  | 0.01388900  |
| H | -1.96752300 | 3.21238200  | 0.65170500  |
| H | 2.36959300  | -0.44402300 | 2.16115900  |
| H | 3.53992500  | -1.41073500 | 1.24740800  |
| H | 1.84518400  | -1.90621300 | 1.32494100  |
| H | 4.24526700  | 0.61009900  | -0.04536200 |
| H | 3.10961300  | 1.61387500  | 0.85998900  |
| H | 3.07718600  | 1.60932400  | -0.91408300 |
| H | 1.80821700  | -1.91670900 | -1.31684100 |
| H | 3.50444000  | -1.42246400 | -1.28576600 |
| H | 2.31157400  | -0.46156000 | -2.17679100 |

### 83-radical

|   |             |             |             |
|---|-------------|-------------|-------------|
| C | 2.86849700  | 0.14676700  | 0.00000300  |
| C | 1.52694500  | 0.49125500  | 0.00004400  |
| C | 0.46926800  | -0.44226300 | 0.00009200  |
| C | 0.79890500  | -1.80021900 | 0.00003200  |
| C | 2.14508200  | -2.17177000 | -0.00003200 |
| C | 3.16796500  | -1.21503600 | -0.00005300 |
| N | 0.95296600  | 1.77676000  | -0.00002200 |
| C | -0.78846900 | 0.32087200  | -0.00002900 |
| C | -0.43778400 | 1.64271000  | -0.00012000 |
| O | 1.59512200  | 2.87146000  | 0.00003800  |

|   |             |             |             |
|---|-------------|-------------|-------------|
| C | -2.20123900 | -0.23327400 | 0.00000300  |
| C | -2.42526000 | -1.09448700 | -1.26600700 |
| C | -3.23511800 | 0.90819100  | -0.00004900 |
| C | -2.42515100 | -1.09434400 | 1.26611900  |
| H | 3.63553900  | 0.91068800  | 0.00000100  |
| H | 0.03414800  | -2.56612300 | -0.00002100 |
| H | 2.40323600  | -3.22457200 | -0.00012800 |
| H | 4.20281800  | -1.53644700 | -0.00008400 |
| H | -1.03163100 | 2.54072000  | -0.00016700 |
| H | -2.29203800 | -0.49614000 | -2.17115900 |
| H | -3.44355200 | -1.49485800 | -1.27003800 |
| H | -1.73397500 | -1.93745500 | -1.31934200 |
| H | -4.24613900 | 0.49250200  | -0.00029200 |
| H | -3.13624600 | 1.54021000  | -0.88683100 |
| H | -3.13660200 | 1.53999900  | 0.88692300  |
| H | -1.73384000 | -1.93729000 | 1.31948500  |
| H | -3.44343500 | -1.49473800 | 1.27028100  |
| H | -2.29186800 | -0.49590600 | 2.17120300  |

#### Entry 84

|   |             |             |             |
|---|-------------|-------------|-------------|
| C | -0.44080200 | -0.29953400 | 1.15599700  |
| C | -0.44080200 | 1.20173200  | 0.77681500  |
| C | -0.44080200 | -0.29953400 | -1.15599700 |
| C | -0.44080200 | 1.20173200  | -0.77681500 |
| N | 0.09952800  | -1.03938600 | 0.00000000  |
| O | 1.54073500  | -0.78578800 | 0.00000000  |
| H | 0.14152700  | -0.53818900 | 2.04464900  |
| H | -1.46085800 | -0.66764300 | 1.30561200  |
| H | -1.30767800 | 1.71820900  | 1.19462300  |
| H | 0.45315800  | 1.69388600  | 1.16231900  |
| H | -1.46085800 | -0.66764300 | -1.30561200 |
| H | 0.14152700  | -0.53818900 | -2.04464900 |
| H | 0.45315800  | 1.69388600  | -1.16231900 |
| H | -1.30767800 | 1.71820900  | -1.19462300 |
| H | 1.90436000  | -1.67689900 | 0.00000000  |

#### 84-radical

|   |             |             |             |
|---|-------------|-------------|-------------|
| C | 0.00000000  | -0.77277200 | -1.38689900 |
| C | 0.00000000  | 0.77277200  | -1.38689900 |
| C | 0.46230500  | 1.13881100  | 0.02743400  |
| C | -0.46230500 | -1.13881100 | 0.02743400  |
| H | -0.64379400 | -1.19282800 | -2.16104000 |
| H | 1.01375200  | -1.14710300 | -1.55614600 |
| H | -1.01375200 | 1.14710300  | -1.55614600 |
| H | 0.64379400  | 1.19282800  | -2.16104000 |
| H | 1.55406600  | 1.21877800  | 0.10469400  |



|   |             |             |            |
|---|-------------|-------------|------------|
| H | 0.02565000  | 2.05957100  | 0.41998500 |
| H | -0.02565000 | -2.05957100 | 0.41998500 |
| H | -1.55406600 | -1.21877800 | 0.10469400 |
| N | 0.00000000  | 0.00000000  | 0.83614000 |
| O | 0.00000000  | 0.00000000  | 2.10570200 |

### Entry 85

|   |             |             |             |
|---|-------------|-------------|-------------|
| C | 0.13384700  | -1.13246100 | -0.00317600 |
| C | 1.44750600  | -0.71177300 | 0.00495200  |
| C | 1.44751200  | 0.71176400  | 0.00556300  |
| C | 0.13386500  | 1.13246000  | -0.00357700 |
| N | -0.63768900 | 0.00000800  | 0.01356700  |
| O | -2.01741800 | -0.00000800 | -0.11050100 |
| H | -0.31834900 | -2.10961000 | -0.02471400 |
| H | 2.31093800  | -1.35829300 | 0.01029100  |
| H | 2.31094700  | 1.35827500  | 0.01137000  |
| H | -0.31831200 | 2.10961100  | -0.02539600 |
| H | -2.35843900 | 0.00009000  | 0.79491800  |

### 85-radical

|   |             |             |             |
|---|-------------|-------------|-------------|
| C | -0.07888400 | -1.14592300 | -0.00048700 |
| C | -1.37166400 | -0.72666000 | -0.00005800 |
| C | -1.37166400 | 0.72666000  | -0.00003200 |
| C | -0.07888400 | 1.14592300  | -0.00032100 |
| N | 0.73218300  | 0.00000000  | 0.00041000  |
| O | 2.00078000  | 0.00000000  | 0.00051700  |
| H | 0.38258800  | -2.11850300 | -0.00085400 |
| H | -2.24506100 | -1.35984900 | -0.00013800 |
| H | -2.24506100 | 1.35984900  | -0.00007600 |
| H | 0.38258800  | 2.11850300  | -0.00055000 |

### Entry 86

|   |             |             |             |
|---|-------------|-------------|-------------|
| C | 1.23032800  | -0.19232000 | 0.00829800  |
| C | 0.66451400  | -1.55503400 | -0.32315500 |
| C | -0.66451400 | -1.55503400 | -0.32315500 |
| C | -1.23032800 | -0.19232000 | 0.00829800  |
| C | 2.29257900  | -0.24671100 | 1.11746800  |
| C | 1.82379600  | 0.48281700  | -1.24591400 |
| C | -2.29257900 | -0.24671100 | 1.11746800  |
| C | -1.82379600 | 0.48281700  | -1.24591400 |
| N | 0.00000000  | 0.47008200  | 0.54910800  |
| O | 0.00000000  | 1.88010900  | 0.29569000  |
| H | 1.30306100  | -2.40259400 | -0.54365800 |
| H | -1.30306100 | -2.40259400 | -0.54365800 |

|   |             |             |             |
|---|-------------|-------------|-------------|
| H | 3.18552400  | -0.78079500 | 0.77797000  |
| H | 2.59604500  | 0.76538700  | 1.40075500  |
| H | 1.89614500  | -0.74920300 | 2.00172400  |
| H | 2.16639500  | 1.49265200  | -1.01396400 |
| H | 2.67841700  | -0.09948000 | -1.60213400 |
| H | 1.09581600  | 0.54500100  | -2.05528400 |
| H | -2.59604500 | 0.76538700  | 1.40075500  |
| H | -3.18552400 | -0.78079500 | 0.77797000  |
| H | -1.89614500 | -0.74920300 | 2.00172400  |
| H | -2.67841700 | -0.09948000 | -1.60213400 |
| H | -2.16639500 | 1.49265200  | -1.01396400 |
| H | -1.09581600 | 0.54500100  | -2.05528400 |
| H | 0.00000000  | 2.26161300  | 1.17953400  |

### 86-radical

|   |             |             |             |
|---|-------------|-------------|-------------|
| C | -1.25352900 | 0.16940800  | 0.00003900  |
| C | -0.66536300 | 1.55993900  | 0.00050500  |
| C | 0.66536300  | 1.55993900  | 0.00050500  |
| C | 1.25352900  | 0.16940800  | 0.00003900  |
| C | -2.07491200 | -0.13762800 | 1.26401600  |
| C | -2.07514300 | -0.13665500 | -1.26402600 |
| C | 2.07491200  | -0.13762700 | 1.26401600  |
| C | 2.07514300  | -0.13665500 | -1.26402600 |
| N | 0.00000000  | -0.63942600 | -0.00039800 |
| O | 0.00000000  | -1.90963700 | -0.00061500 |
| H | -1.29549800 | 2.44119400  | 0.00077300  |
| H | 1.29549800  | 2.44119400  | 0.00077300  |
| H | -2.99361800 | 0.45492800  | 1.27300000  |
| H | -2.34174300 | -1.19650300 | 1.28032900  |
| H | -1.50456900 | 0.09224300  | 2.16625200  |
| H | -2.34200100 | -1.19551300 | -1.28111700 |
| H | -2.99384900 | 0.45591200  | -1.27239500 |
| H | -1.50495400 | 0.09389700  | -2.16618600 |
| H | 2.34174300  | -1.19650300 | 1.28032900  |
| H | 2.99361800  | 0.45492900  | 1.27300000  |
| H | 1.50456900  | 0.09224400  | 2.16625200  |
| H | 2.99384900  | 0.45591200  | -1.27239500 |
| H | 2.34200100  | -1.19551300 | -1.28111700 |
| H | 1.50495400  | 0.09389700  | -2.16618600 |

### Entry 87

|   |             |             |             |
|---|-------------|-------------|-------------|
| C | -0.61128700 | -0.58577000 | 1.36039700  |
| C | -1.21911300 | -0.14952400 | 0.02014400  |
| C | 1.19834700  | -0.13804200 | -0.01410700 |
| N | -0.02313100 | 0.45092600  | -0.67980900 |

|   |             |             |             |
|---|-------------|-------------|-------------|
| O | 0.69355100  | -1.02342700 | 1.00715000  |
| C | -1.66143500 | -1.37498000 | -0.79653600 |
| C | -2.38064900 | 0.82883400  | 0.17003000  |
| C | 1.96526100  | -0.99685400 | -1.01666100 |
| C | 2.11010600  | 0.90597800  | 0.63310500  |
| O | -0.01825500 | 1.88483300  | -0.51684400 |
| H | -0.57317700 | 0.25523700  | 2.06715200  |
| H | -1.12867300 | -1.42325000 | 1.83198900  |
| H | -2.53544400 | -1.84141800 | -0.33178300 |
| H | -1.92594700 | -1.07539200 | -1.81294500 |
| H | -0.87052600 | -2.12415800 | -0.85237300 |
| H | -2.10537600 | 1.70412600  | 0.75660200  |
| H | -2.73651300 | 1.16856000  | -0.80593000 |
| H | -3.21043900 | 0.31867300  | 0.66775700  |
| H | 1.30242000  | -1.72326400 | -1.48731400 |
| H | 2.39859200  | -0.36639900 | -1.79647300 |
| H | 2.77028800  | -1.53337600 | -0.50875200 |
| H | 2.92951800  | 0.37134500  | 1.11812000  |
| H | 2.52417900  | 1.59404200  | -0.10464700 |
| H | 1.57970700  | 1.49311100  | 1.38247600  |
| H | -0.06644400 | 2.19658500  | -1.42589500 |

### 87-radical

|   |           |           |           |
|---|-----------|-----------|-----------|
| C | 0.609925  | -1.521394 | -0.207210 |
| C | 1.244398  | -0.136985 | -0.001030 |
| C | -1.232273 | -0.121045 | 0.012690  |
| N | 0.012910  | 0.689446  | -0.113070 |
| O | 0.012415  | 1.957488  | -0.161477 |
| O | -0.718971 | -1.416294 | 0.317160  |
| C | 1.852737  | 0.030017  | 1.400786  |
| C | 2.241956  | 0.252427  | -1.091350 |
| C | -2.086251 | 0.361562  | 1.176771  |
| C | -1.996120 | -0.108471 | -1.314239 |
| H | 0.585113  | -1.785236 | -1.272122 |
| H | 1.115557  | -2.314353 | 0.343882  |
| H | 1.165334  | -0.326659 | 2.170875  |
| H | 2.785511  | -0.535475 | 1.479159  |
| H | 2.069032  | 1.083995  | 1.588053  |
| H | 2.547402  | 1.292493  | -0.963216 |
| H | 3.131854  | -0.380284 | -1.033692 |
| H | 1.802155  | 0.145933  | -2.085731 |
| H | -2.969957 | -0.272633 | 1.271529  |
| H | -1.518402 | 0.317367  | 2.107015  |
| H | -2.400633 | 1.391583  | 1.001297  |
| H | -2.910854 | -0.697598 | -1.220842 |

|   |           |           |           |
|---|-----------|-----------|-----------|
| H | -2.257076 | 0.918043  | -1.580275 |
| H | -1.389193 | -0.529518 | -2.118411 |

### Entry 88

|   |             |             |             |
|---|-------------|-------------|-------------|
| C | 0.32428500  | 0.94379900  | -0.03529100 |
| C | -0.08910000 | -0.38694800 | -0.17140600 |
| C | 0.81569900  | -1.44290500 | -0.15496400 |
| C | 2.17006500  | -1.13347100 | 0.00019900  |
| C | 2.59852200  | 0.18849200  | 0.12738200  |
| C | 1.67132400  | 1.23794300  | 0.10758300  |
| N | -1.48753100 | -0.44220200 | -0.36203500 |
| C | -0.89742800 | 1.83440600  | -0.11371400 |
| O | -2.12091700 | -1.58679000 | 0.16674900  |
| C | -2.03621200 | 0.82736800  | 0.15338300  |
| H | 0.47659700  | -2.46566100 | -0.26207000 |
| H | 2.89814300  | -1.93664800 | 0.02177100  |
| H | 3.65376900  | 0.40387000  | 0.24801200  |
| H | 2.00488000  | 2.26486600  | 0.21541000  |
| H | -0.99767600 | 2.26236500  | -1.11750500 |
| H | -0.89060200 | 2.65853600  | 0.60201900  |
| H | -1.91334200 | -1.61198700 | 1.11926000  |
| H | -2.21829700 | 0.73570600  | 1.23669000  |
| H | -2.97635400 | 1.06657900  | -0.34237300 |

### 88-radical

|   |           |           |           |
|---|-----------|-----------|-----------|
| C | 0.265646  | 0.923708  | -0.000041 |
| C | -0.086019 | -0.431291 | 0.000027  |
| C | 0.861069  | -1.455454 | 0.000020  |
| C | 2.202634  | -1.080884 | -0.000060 |
| C | 2.575779  | 0.267645  | -0.000130 |
| C | 1.604635  | 1.278040  | -0.000120 |
| N | -1.472490 | -0.567163 | 0.000098  |
| C | -0.984419 | 1.782753  | 0.000012  |
| O | -2.113747 | -1.660685 | 0.000163  |
| C | -2.142640 | 0.756132  | 0.000014  |
| H | 0.545422  | -2.490621 | 0.000074  |
| H | 2.969486  | -1.847034 | -0.000069 |
| H | 3.626268  | 0.533555  | -0.000193 |
| H | 1.902214  | 2.321296  | -0.000174 |
| H | -1.023413 | 2.430195  | -0.879740 |
| H | -1.023362 | 2.430131  | 0.879814  |
| H | -2.779697 | 0.817143  | 0.885022  |
| H | -2.779615 | 0.817065  | -0.885060 |

**Entry 89**

|   |             |             |             |
|---|-------------|-------------|-------------|
| N | 0.00000000  | 1.38503900  | 0.17648300  |
| C | -1.13962100 | 0.59286500  | 0.06134900  |
| O | -0.00000300 | 2.71968300  | -0.22325800 |
| C | 1.13962100  | 0.59286600  | 0.06134800  |
| C | -0.72648900 | -0.76162200 | 0.03724900  |
| C | -1.69828700 | -1.76507200 | 0.00102500  |
| C | -3.04184300 | -1.40500300 | -0.03960500 |
| C | -3.42449100 | -0.05473000 | -0.04463800 |
| C | -2.47912500 | 0.96619800  | 0.00956100  |
| C | 0.72648900  | -0.76162200 | 0.03725000  |
| C | 1.69828800  | -1.76507200 | 0.00102600  |
| C | 3.04184400  | -1.40500200 | -0.03960400 |
| C | 3.42449100  | -0.05472900 | -0.04463900 |
| C | 2.47912500  | 0.96619800  | 0.00956000  |
| H | 0.00000700  | 3.22785900  | 0.59919100  |
| H | -1.41073000 | -2.81055600 | -0.00693100 |
| H | -3.80369600 | -2.17488800 | -0.07525600 |
| H | -4.47704800 | 0.20046400  | -0.09189100 |
| H | -2.77119100 | 2.00885600  | 0.00018000  |
| H | 1.41073100  | -2.81055600 | -0.00692800 |
| H | 3.80369700  | -2.17488700 | -0.07525500 |
| H | 4.47704800  | 0.20046600  | -0.09189300 |
| H | 2.77119200  | 2.00885600  | 0.00017700  |

**89-radical**

|   |             |             |             |
|---|-------------|-------------|-------------|
| N | 0.00000000  | 1.44258800  | -0.00024500 |
| C | -1.14537700 | 0.61835100  | -0.00020600 |
| O | 0.00000000  | 2.71032600  | 0.00020300  |
| C | 1.14537700  | 0.61835100  | -0.00020600 |
| C | -0.73126300 | -0.72995800 | -0.00026500 |
| C | -1.69914400 | -1.73072300 | -0.00010900 |
| C | -3.04615600 | -1.36176200 | 0.00021300  |
| C | -3.42979600 | -0.01359400 | 0.00028800  |
| C | -2.47802500 | 1.00508800  | -0.00004300 |
| C | 0.73126300  | -0.72995800 | -0.00026500 |
| C | 1.69914400  | -1.73072300 | -0.00010900 |
| C | 3.04615600  | -1.36176200 | 0.00021300  |
| C | 3.42979600  | -0.01359400 | 0.00028800  |
| C | 2.47802500  | 1.00508800  | -0.00004300 |
| H | -1.41824700 | -2.77766700 | -0.00015400 |
| H | -3.80948400 | -2.13111400 | 0.00045100  |
| H | -4.48310800 | 0.24124700  | 0.00051000  |
| H | -2.75019800 | 2.05276000  | -0.00003000 |

|   |            |             |             |
|---|------------|-------------|-------------|
| H | 1.41824700 | -2.77766700 | -0.00015400 |
| H | 3.80948400 | -2.13111400 | 0.00045100  |
| H | 4.48310800 | 0.24124700  | 0.00051000  |
| H | 2.75019800 | 2.05276000  | -0.00003000 |

### Entry 90

|   |             |             |             |
|---|-------------|-------------|-------------|
| C | -1.17855300 | 0.63259400  | -0.10897800 |
| C | -1.18249300 | 1.95843800  | -0.31503500 |
| C | 1.17518300  | 1.97225300  | -0.25251600 |
| C | 1.17758000  | 0.63942900  | -0.09574700 |
| N | -0.00382300 | 2.74396100  | -0.37065000 |
| O | -0.00088300 | -0.07365500 | 0.00924700  |
| C | -2.37041200 | -0.23370500 | -0.07931800 |
| C | -2.27782000 | -1.58010200 | -0.45962700 |
| C | -3.61316700 | 0.26677300  | 0.33670700  |
| C | -3.40532900 | -2.39673600 | -0.44490100 |
| C | -4.73781300 | -0.55092700 | 0.34471300  |
| C | -4.63937000 | -1.88612500 | -0.04730800 |
| C | 2.37265400  | -0.21583500 | -0.02390500 |
| C | 2.31161000  | -1.45402200 | 0.63375900  |
| C | 3.59348300  | 0.18633800  | -0.58793100 |
| C | 3.44634400  | -2.25284200 | 0.74367500  |
| C | 4.72523200  | -0.61292400 | -0.47076700 |
| C | 4.65820600  | -1.83588600 | 0.19689500  |
| O | -0.03933900 | 3.67599900  | 0.79757100  |
| H | -2.10435500 | 2.49265500  | -0.48890000 |
| H | 2.09854000  | 2.52913500  | -0.30788000 |
| H | -1.32138900 | -1.97884400 | -0.77230900 |
| H | -3.69405200 | 1.29215100  | 0.67751100  |
| H | -3.31880700 | -3.43453100 | -0.74674000 |
| H | -5.68999800 | -0.14963100 | 0.67295100  |
| H | -5.51581900 | -2.52398300 | -0.03423300 |
| H | 1.37466000  | -1.77953400 | 1.06653100  |
| H | 3.65373100  | 1.11611900  | -1.14058400 |
| H | 3.38261700  | -3.20347800 | 1.26127900  |
| H | 5.65874000  | -0.28718600 | -0.91568900 |
| H | 5.54021200  | -2.46030500 | 0.28198500  |
| H | -0.04755400 | 4.54063000  | 0.36779000  |

### 90-radical

|   |           |          |           |
|---|-----------|----------|-----------|
| C | -1.190895 | 0.650818 | -0.000898 |
| C | -1.185983 | 2.003587 | -0.018836 |
| C | 1.185983  | 2.003587 | 0.018835  |

|   |           |           |           |
|---|-----------|-----------|-----------|
| C | 1.190895  | 0.650818  | 0.000898  |
| N | 0.000000  | 2.726109  | 0.000000  |
| O | 0.000000  | -0.058305 | 0.000000  |
| C | -2.378032 | -0.203979 | -0.017567 |
| C | -2.270249 | -1.554830 | -0.388508 |
| C | -3.644699 | 0.298377  | 0.330989  |
| C | -3.398395 | -2.368954 | -0.427995 |
| C | -4.766240 | -0.518836 | 0.286005  |
| C | -4.650377 | -1.857194 | -0.094871 |
| C | 2.378032  | -0.203979 | 0.017567  |
| C | 3.644699  | 0.298377  | -0.330989 |
| C | 2.270249  | -1.554830 | 0.388508  |
| C | 4.766241  | -0.518836 | -0.286005 |
| C | 3.398395  | -2.368954 | 0.427995  |
| C | 4.650377  | -1.857195 | 0.094872  |
| O | 0.000000  | 4.010180  | 0.000000  |
| H | -2.079874 | 2.604123  | -0.060000 |
| H | 2.079874  | 2.604123  | 0.060000  |
| H | -1.302679 | -1.957127 | -0.656853 |
| H | -3.752255 | 1.325323  | 0.658730  |
| H | -3.297191 | -3.407273 | -0.723067 |
| H | -5.733393 | -0.114203 | 0.561638  |
| H | -5.527161 | -2.493661 | -0.124324 |
| H | 3.752255  | 1.325323  | -0.658729 |
| H | 1.302679  | -1.957127 | 0.656853  |
| H | 5.733393  | -0.114203 | -0.561638 |
| H | 3.297191  | -3.407273 | 0.723066  |
| H | 5.527161  | -2.493661 | 0.124324  |

### Entry 91

|   |             |             |             |
|---|-------------|-------------|-------------|
| N | 0.00001800  | 1.35939700  | 0.57565900  |
| C | -1.20921600 | 0.78140300  | 0.11639400  |
| C | -2.33399500 | 1.55983100  | -0.16537100 |
| C | -1.23750000 | -0.61923600 | -0.02838700 |
| C | -3.50274300 | 0.94692800  | -0.60796900 |
| C | -2.41928600 | -1.19958500 | -0.49056900 |
| C | -3.54835100 | -0.43273800 | -0.77797000 |
| C | 1.20924100  | 0.78137700  | 0.11639700  |
| C | 2.33403200  | 1.55978900  | -0.16536100 |
| C | 1.23749800  | -0.61926400 | -0.02838700 |
| C | 3.50277100  | 0.94687300  | -0.60796100 |
| C | 2.41928000  | -1.19962400 | -0.49057500 |
| C | 3.54835600  | -0.43279200 | -0.77797100 |
| C | -0.00001600 | -1.41930100 | 0.39497400  |
| C | -0.00002600 | -1.54057600 | 1.94786200  |

|   |             |             |             |
|---|-------------|-------------|-------------|
| C | -0.00007300 | -2.83944500 | -0.19232700 |
| O | 0.00003800  | 2.77013700  | 0.54072400  |
| H | -2.27911900 | 2.63348000  | -0.05822700 |
| H | -4.37184800 | 1.55587700  | -0.83011100 |
| H | -2.47161600 | -2.27214900 | -0.62478200 |
| H | -4.45344700 | -0.91421700 | -1.12938600 |
| H | 2.27917000  | 2.63343800  | -0.05821200 |
| H | 4.37188400  | 1.55581100  | -0.83009900 |
| H | 2.47160200  | -2.27218500 | -0.62480300 |
| H | 4.45344500  | -0.91428200 | -1.12939000 |
| H | -0.88850400 | -2.08353200 | 2.28219800  |
| H | 0.88839100  | -2.08362800 | 2.28220200  |
| H | 0.00002600  | -0.55919700 | 2.42516700  |
| H | -0.87466800 | -3.39686700 | 0.14821400  |
| H | 0.00005300  | -2.82964100 | -1.28513100 |
| H | 0.87433400  | -3.39703200 | 0.14841800  |
| H | 0.00004400  | 3.02541200  | 1.47186300  |

### 91-radical

|   |             |             |             |
|---|-------------|-------------|-------------|
| N | -0.00000100 | 1.54601800  | -0.00022600 |
| C | 1.23200500  | 0.85128600  | -0.00012400 |
| C | 2.41132800  | 1.61245200  | -0.00022100 |
| C | 1.26592400  | -0.55269900 | 0.00007200  |
| C | 3.64170700  | 0.97813300  | -0.00012200 |
| C | 2.52791900  | -1.15861700 | 0.00017000  |
| C | 3.70367000  | -0.41644500 | 0.00007500  |
| C | -1.23200600 | 0.85128500  | -0.00012600 |
| C | -2.41132900 | 1.61245100  | -0.00022300 |
| C | -1.26592400 | -0.55270000 | 0.00007100  |
| C | -3.64170800 | 0.97813200  | -0.00012500 |
| C | -2.52791900 | -1.15861800 | 0.00016800  |
| C | -3.70367100 | -0.41644700 | 0.00007300  |
| C | 0.00000000  | -1.41213200 | 0.00018800  |
| C | 0.00000000  | -2.30822800 | 1.26845400  |
| C | 0.00000300  | -2.30857500 | -1.26783400 |
| O | -0.00000100 | 2.82437000  | -0.00040600 |
| H | 2.32411800  | 2.68945900  | -0.00037000 |
| H | 4.55095500  | 1.56790100  | -0.00019600 |
| H | 2.59669500  | -2.23990800 | 0.00032300  |
| H | 4.66162700  | -0.92327900 | 0.00015500  |
| H | -2.32411900 | 2.68945800  | -0.00037300 |
| H | -4.55095600 | 1.56789900  | -0.00020000 |
| H | -2.59669500 | -2.23990900 | 0.00032200  |
| H | -4.66162700 | -0.92328100 | 0.00015300  |
| H | 0.88210700  | -2.95139700 | 1.29154400  |



|   |             |             |             |
|---|-------------|-------------|-------------|
| H | -0.88210400 | -2.95139900 | 1.29154200  |
| H | -0.00000200 | -1.69710100 | 2.17370300  |
| H | 0.00000100  | -1.69769600 | -2.17325000 |
| H | -0.88210100 | -2.95175500 | -1.29074800 |
| H | 0.88210900  | -2.95175000 | -1.29074800 |

### Entry 92

|   |             |             |             |
|---|-------------|-------------|-------------|
| C | -0.70796100 | -0.06058400 | 3.67391900  |
| C | -1.41882100 | -0.01552000 | 2.48861800  |
| C | -0.76185600 | 0.02196200  | 1.24913800  |
| C | 0.65077600  | 0.01949600  | 1.22452800  |
| C | 1.37526700  | -0.03298300 | 2.42893100  |
| C | 0.69336600  | -0.07405200 | 3.63359700  |
| C | -1.54958500 | 0.04932900  | 0.00000000  |
| C | 0.65077600  | 0.01949600  | -1.22452800 |
| C | -0.76185600 | 0.02196200  | -1.24913800 |
| C | -1.41882100 | -0.01552000 | -2.48861800 |
| C | -0.70796100 | -0.06058400 | -3.67391900 |
| C | 0.69336600  | -0.07405200 | -3.63359700 |
| C | 1.37526700  | -0.03298300 | -2.42893100 |
| N | 1.29609700  | 0.09781600  | 0.00000000  |
| O | 2.68361000  | -0.02701700 | 0.00000000  |
| O | -2.77649800 | 0.07859400  | 0.00000000  |
| H | -1.22632900 | -0.09126800 | 4.62464800  |
| H | -2.50204100 | -0.01100400 | 2.47434300  |
| H | 2.45510300  | -0.06260200 | 2.40475000  |
| H | 1.26004000  | -0.12170500 | 4.55688000  |
| H | -2.50204100 | -0.01100400 | -2.47434300 |
| H | -1.22632900 | -0.09126800 | -4.62464800 |
| H | 1.26004000  | -0.12170500 | -4.55688000 |
| H | 2.45510300  | -0.06260200 | -2.40475000 |
| H | 3.02512500  | 0.88002100  | 0.00000000  |

### 92-radical

|   |           |           |           |
|---|-----------|-----------|-----------|
| C | -3.672062 | -0.669594 | 0.000079  |
| C | -2.489856 | -1.391220 | 0.000059  |
| C | -1.250923 | -0.736124 | -0.000013 |
| C | -1.228733 | 0.672269  | -0.000055 |
| C | -2.423311 | 1.406802  | -0.000038 |
| C | -3.632513 | 0.732076  | 0.000029  |
| C | 0.000000  | -1.524301 | -0.000065 |
| C | 1.228733  | 0.672269  | -0.000058 |
| C | 1.250923  | -0.736124 | -0.000016 |
| C | 2.489856  | -1.391220 | 0.000054  |

|   |           |           |           |
|---|-----------|-----------|-----------|
| C | 3.672062  | -0.669594 | 0.000072  |
| C | 3.632513  | 0.732076  | 0.000022  |
| C | 2.423311  | 1.406802  | -0.000043 |
| N | 0.000000  | 1.367786  | -0.000100 |
| O | 0.000000  | 2.642827  | -0.000118 |
| O | 0.000000  | -2.749076 | 0.000142  |
| H | -4.624887 | -1.185522 | 0.000131  |
| H | -2.485421 | -2.474246 | 0.000089  |
| H | -2.372551 | 2.486234  | -0.000071 |
| H | -4.556444 | 1.298931  | 0.000045  |
| H | 2.485421  | -2.474246 | 0.000084  |
| H | 4.624887  | -1.185522 | 0.000122  |
| H | 4.556444  | 1.298931  | 0.000036  |
| H | 2.372551  | 2.486234  | -0.000076 |

### Entry 93

|   |             |             |             |
|---|-------------|-------------|-------------|
| C | -0.43403400 | 0.02991400  | -0.01586300 |
| C | 0.36504300  | 1.07597000  | -0.25803500 |
| N | 1.73591200  | 0.72221500  | -0.35471000 |
| O | 2.55930000  | 1.68900200  | 0.33817000  |
| C | -1.94949300 | -0.00689000 | 0.00376700  |
| C | -2.43382400 | -0.52842700 | 1.37722500  |
| C | -2.54138200 | 1.39433100  | -0.23006100 |
| C | -2.46200500 | -0.95818000 | -1.10314600 |
| C | 0.44631500  | -1.20380300 | 0.11325600  |
| C | 1.85191000  | -0.59965100 | 0.31666200  |
| C | 3.01383300  | -1.42541400 | -0.21337400 |
| H | 0.10276600  | 2.10415000  | -0.45827600 |
| H | 3.19369600  | 1.96003800  | -0.33437700 |
| H | -2.06003200 | -1.53531700 | 1.58072600  |
| H | -2.09751000 | 0.12762100  | 2.18456700  |
| H | -3.52711900 | -0.56998000 | 1.40365500  |
| H | -2.25487000 | 1.79055400  | -1.20820600 |
| H | -3.63380600 | 1.35306100  | -0.19401100 |
| H | -2.20889400 | 2.10058700  | 0.53587500  |
| H | -3.55594600 | -0.99317900 | -1.09926400 |
| H | -2.13601500 | -0.62033100 | -2.09090500 |
| H | -2.09710900 | -1.97837500 | -0.95661300 |
| H | 0.42158600  | -1.79531000 | -0.81202700 |
| H | 0.16352100  | -1.87203800 | 0.93088000  |
| H | 1.99600400  | -0.39594600 | 1.38640900  |
| H | 3.96329500  | -0.90693100 | -0.05648300 |
| H | 3.06955100  | -2.38640500 | 0.30652600  |
| H | 2.89692600  | -1.61681600 | -1.28345000 |

### 93-radical

|   |             |             |             |
|---|-------------|-------------|-------------|
| C | -0.39857300 | 0.04942600  | 0.06588200  |
| C | 0.40455500  | 1.12864500  | -0.07985800 |
| N | 1.74311100  | 0.81715900  | 0.08244800  |
| O | 2.71494900  | 1.63541300  | 0.03716600  |
| C | -1.90835200 | -0.00334100 | -0.04187500 |
| C | -2.50747700 | -0.48946100 | 1.29986000  |
| C | -2.48766500 | 1.38487300  | -0.36914900 |
| C | -2.31679300 | -0.99121100 | -1.16102600 |
| C | 0.47146100  | -1.17192000 | 0.33362300  |
| C | 1.91433000  | -0.62174600 | 0.43341400  |
| C | 2.94307300  | -1.28788500 | -0.47163400 |
| H | 0.15703700  | 2.15632200  | -0.29707500 |
| H | -2.15778000 | -1.49219900 | 1.55853600  |
| H | -2.23822100 | 0.18617800  | 2.11618800  |
| H | -3.59904200 | -0.52685800 | 1.23510300  |
| H | -2.10808300 | 1.76311000  | -1.32245600 |
| H | -3.57702400 | 1.32846400  | -0.44415100 |
| H | -2.24571600 | 2.11373500  | 0.40935400  |
| H | -3.40645600 | -1.03063500 | -1.25070500 |
| H | -1.90796000 | -0.68111000 | -2.12667000 |
| H | -1.96565000 | -2.00524500 | -0.95293200 |
| H | 0.38962100  | -1.89803200 | -0.48360800 |
| H | 0.17781100  | -1.69462300 | 1.24827000  |
| H | 2.27220400  | -0.64174900 | 1.46880700  |
| H | 3.89300600  | -0.75353000 | -0.41878600 |
| H | 3.10486900  | -2.32279600 | -0.15878600 |
| H | 2.60267800  | -1.28872600 | -1.51098300 |

### Entry 94

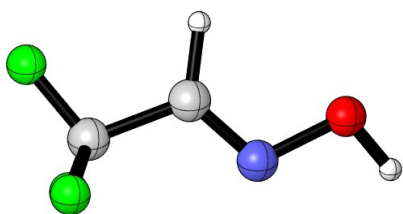

|   |            |            |            |
|---|------------|------------|------------|
| C | 0.1214119  | 0.3914074  | -0.0000284 |
| N | 1.0398839  | -0.4807726 | -0.0000224 |
| H | 0.2966319  | 1.4651104  | -0.0000104 |
| C | -1.3080921 | -0.0930926 | -0.0000024 |
| F | -1.6012171 | -0.8363916 | -1.0844644 |
| F | -2.1388221 | 0.9731244  | -0.0005744 |
| F | -1.6014821 | -0.8354116 | 1.0850686  |
| O | 2.2990629  | 0.0883184  | 0.0000186  |
| H | 2.8926229  | -0.6722926 | 0.0000156  |

### 94-radical

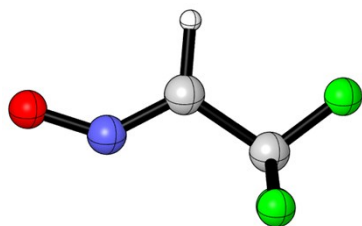

|   |            |            |            |
|---|------------|------------|------------|
| C | -0.3616659 | 0.4836482  | -0.0000691 |
| N | -1.4984819 | -0.1023527 | 0.0002199  |
| H | -0.2722909 | 1.5656723  | -0.0004061 |
| O | -2.6522039 | 0.2682652  | 0.0002359  |
| C | 0.8828231  | -0.3568908 | -0.0000041 |
| F | 0.9707371  | -1.1567328 | 1.0830499  |
| F | 1.9599941  | 0.4547542  | 0.0002859  |
| F | 0.9710881  | -1.1563638 | -1.0833121 |

### Entry 95

|   |             |             |             |
|---|-------------|-------------|-------------|
| C | -1.12586700 | 0.17839400  | -0.00000500 |
| N | -0.07381000 | -0.53007800 | -0.00000400 |
| H | -1.10576200 | 1.26740200  | 0.00000800  |
| H | -2.06825900 | -0.35618100 | 0.00003100  |
| O | 1.08146100  | 0.26414400  | 0.00000000  |
| H | 1.79420400  | -0.38418700 | 0.00002400  |

### 95-radical

|   |             |             |             |
|---|-------------|-------------|-------------|
| C | -1.12305200 | 0.11646600  | -0.00001700 |
| O | 1.18666800  | 0.14189600  | 0.00001700  |
| N | 0.06871800  | -0.34695700 | -0.00000600 |
| H | -1.30014400 | 1.18907200  | 0.00000800  |
| H | -1.93591100 | -0.59433400 | -0.00000100 |

### Entry 96

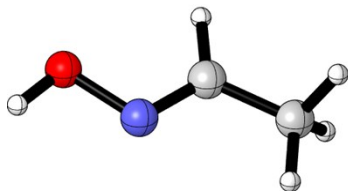

|   |            |            |            |
|---|------------|------------|------------|
| C | -0.0246444 | 0.3062361  | -0.1719368 |
| N | -1.0604004 | -0.2771679 | 0.2766002  |
| H | -0.1173704 | 1.2559711  | -0.7036938 |
| C | 1.3257676  | -0.3028859 | 0.0249582  |
| H | 1.9770126  | 0.3790061  | 0.5815162  |

|   |            |            |            |
|---|------------|------------|------------|
| H | 1.2471086  | -1.2434009 | 0.5710512  |
| H | 1.8067106  | -0.4905939 | -0.9406138 |
| O | -2.2291124 | 0.4572691  | -0.0123308 |
| H | -2.9250714 | -0.0844339 | 0.3744492  |

### 96-radical

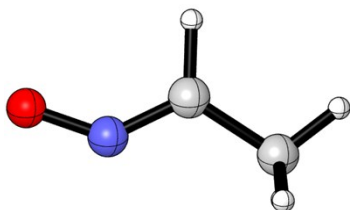

|   |            |            |            |
|---|------------|------------|------------|
| C | -0.3271155 | 0.4378724  | -0.0000280 |
| O | -2.6380295 | 0.2852164  | 0.0001370  |
| N | -1.4790995 | -0.1183346 | 0.0001500  |
| H | -0.2916185 | 1.5272464  | -0.0002580 |
| C | 0.9347345  | -0.3780846 | -0.0000040 |
| H | 1.8016705  | 0.2834814  | 0.0002130  |
| H | 0.9996115  | -1.0188476 | 0.8836170  |
| H | 0.9998465  | -1.0185496 | -0.8838270 |

### Entry 97

|   |             |             |             |
|---|-------------|-------------|-------------|
| C | 0.52163200  | 0.68377200  | -0.00000700 |
| N | -0.75214400 | 0.68866000  | 0.00000600  |
| C | 1.45143300  | -0.48984100 | -0.00001000 |
| O | -1.29860100 | -0.61246500 | 0.00000900  |
| H | 0.94604500  | 1.68556100  | 0.00000400  |
| H | 0.91090400  | -1.43356400 | -0.00067200 |
| H | 2.10154300  | -0.44903200 | 0.87993700  |
| H | 2.10248400  | -0.44827900 | -0.87921700 |
| H | -2.24555000 | -0.43916600 | -0.00007000 |

### 97-radical

|   |             |             |             |
|---|-------------|-------------|-------------|
| C | 0.46644100  | 0.66554000  | -0.00000900 |
| N | -0.79916300 | 0.47339000  | 0.00000700  |
| C | 1.48191100  | -0.44128000 | -0.00000200 |
| O | -1.51448200 | -0.52591300 | -0.00000200 |
| H | 0.77378600  | 1.70451900  | 0.00000900  |
| H | 0.99412700  | -1.41634100 | -0.00057300 |
| H | 2.12562000  | -0.37042700 | 0.88244300  |
| H | 2.12635600  | -0.36973400 | -0.88184700 |

### Entry 98

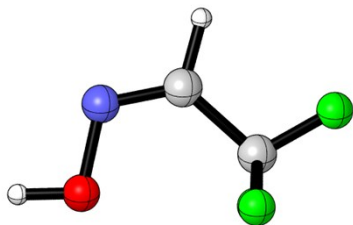

|   |            |            |            |
|---|------------|------------|------------|
| C | -0.0726468 | 0.8198947  | -0.0001296 |
| N | -1.3195618 | 0.5721307  | -0.0000116 |
| C | 1.0568472  | -0.1892473 | -0.0000296 |
| O | -1.6143588 | -0.7776963 | 0.0002194  |
| F | 1.0404772  | -0.9815873 | 1.0877734  |
| F | 2.2367112  | 0.4724687  | -0.0003416 |
| F | 1.0402062  | -0.9821363 | -1.0874236 |
| H | 0.2106342  | 1.8655407  | -0.0003196 |
| H | -2.5783088 | -0.7993673 | 0.0002624  |

### 98-radical

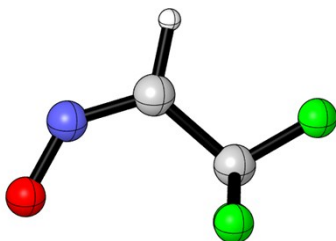

|   |            |            |            |
|---|------------|------------|------------|
| C | -0.3577995 | 0.7040099  | -0.0000630 |
| N | -1.5849815 | 0.3372659  | 0.0000010  |
| C | 0.7800945  | -0.2850261 | 0.0000090  |
| O | -2.1702415 | -0.7250211 | 0.0000990  |
| F | 0.7602285  | -1.0866251 | 1.0842730  |
| F | 1.9505785  | 0.3816259  | -0.0004430 |
| F | 0.7597675  | -1.0873181 | -1.0837280 |
| H | -0.1376465 | 1.7610889  | -0.0001480 |

### Entry 99

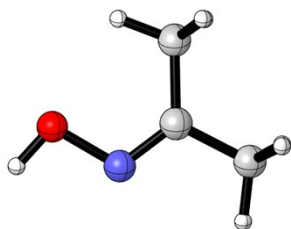

|   |            |            |            |
|---|------------|------------|------------|
| C | -0.0221014 | -0.1929573 | -0.0000362 |
| C | 1.2836036  | -0.9392483 | 0.0000068  |
| C | 0.0176116  | 1.3100037  | 0.0000308  |
| N | -1.0772154 | -0.9135833 | -0.0000772 |
| H | 1.1103906  | -2.0151552 | 0.0000568  |
| H | 1.8775336  | -0.6740383 | 0.8811838  |
| H | 1.8775496  | -0.6741183 | -0.8811822 |
| H | -0.9794904 | 1.7426887  | -0.0007982 |
| H | 0.5641216  | 1.6668728  | -0.8790312 |
| H | 0.5625706  | 1.6668227  | 0.8800828  |
| O | -2.2676394 | -0.1478183 | -0.0000432 |
| H | -2.9469344 | -0.8294693 | -0.0001922 |

### 99-radical

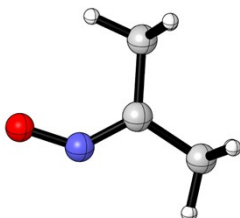

|   |            |            |            |
|---|------------|------------|------------|
| C | -0.2755861 | -0.2200019 | -0.0000437 |
| C | 0.9762069  | -1.0487749 | 0.0000253  |
| C | -0.1830341 | 1.2840351  | 0.0000283  |
| O | -2.5825761 | -0.4343519 | -0.0001967 |
| N | -1.4095621 | -0.8181379 | -0.0001237 |
| H | 0.7397039  | -2.1128549 | 0.0000013  |
| H | 1.5874559  | -0.8261539 | 0.8812933  |
| H | 1.5875669  | -0.8261359 | -0.8811617 |
| H | -1.1724881 | 1.7406061  | -0.0005537 |
| H | 0.3666909  | 1.6308901  | -0.8813367 |
| H | 0.3656219  | 1.6308801  | 0.8820683  |

### Entry 100

|   |             |             |             |
|---|-------------|-------------|-------------|
| C | 0.10958000  | -0.03759400 | 0.24606100  |
| N | 0.18387900  | 1.19997000  | -0.05995300 |
| C | 1.38677100  | -0.84329800 | 0.20055500  |
| C | -1.16511600 | -0.75088300 | 0.63207300  |
| O | -1.07706600 | 1.84467300  | 0.01290100  |
| C | 2.63435000  | -0.10848700 | -0.28741800 |
| C | -1.99048500 | -1.18697300 | -0.59291400 |
| H | 1.19791700  | -1.72392100 | -0.42824500 |
| H | 1.55665400  | -1.24500300 | 1.20862500  |
| H | -1.76755700 | -0.08766000 | 1.25672100  |
| H | -0.90611400 | -1.62870900 | 1.23188600  |
| H | -0.85514500 | 2.75398800  | -0.21139600 |

|   |             |             |             |
|---|-------------|-------------|-------------|
| H | 3.49405400  | -0.78378500 | -0.28200600 |
| H | 2.86439300  | 0.74696000  | 0.35041000  |
| H | 2.49920600  | 0.26901700  | -1.30300200 |
| H | -2.89073500 | -1.71951100 | -0.27512900 |
| H | -1.41812200 | -1.85593800 | -1.24182500 |
| H | -2.29577600 | -0.31920000 | -1.17971600 |

### 100-radical

|   |             |             |             |
|---|-------------|-------------|-------------|
| C | 0.06706200  | -0.06529800 | 0.26071700  |
| N | 0.17074800  | 1.18374200  | -0.01108200 |
| C | 1.28530100  | -0.94810700 | 0.18049400  |
| C | -1.28070300 | -0.64993200 | 0.63058700  |
| O | -0.64226800 | 2.11538200  | -0.02503100 |
| C | 2.56323900  | -0.25929800 | -0.29754300 |
| C | -2.16044500 | -0.94359400 | -0.59670700 |
| H | 1.04728300  | -1.79449100 | -0.47753400 |
| H | 1.44699200  | -1.39144500 | 1.17218400  |
| H | -1.79744700 | 0.05310600  | 1.29137500  |
| H | -1.11353000 | -1.56963700 | 1.19920800  |
| H | 3.39165100  | -0.97120400 | -0.32168900 |
| H | 2.84135500  | 0.56303800  | 0.36573600  |
| H | 2.43919500  | 0.15284400  | -1.30171100 |
| H | -3.11955700 | -1.36726100 | -0.28716900 |
| H | -1.67841500 | -1.65809800 | -1.26934400 |
| H | -2.36133700 | -0.02872700 | -1.15852000 |

### Entry 101

|   |             |             |             |
|---|-------------|-------------|-------------|
| C | -0.11958000 | 0.17698500  | 0.06496200  |
| C | -1.52677900 | -0.31402600 | 0.38446500  |
| C | 1.02917400  | -0.79566800 | 0.31442100  |
| N | -0.03115200 | 1.37291500  | -0.37307200 |
| C | 1.81905000  | -1.14938000 | -0.96012400 |
| C | 1.95384200  | -0.30535800 | 1.44652700  |
| C | -1.96204400 | -1.39287900 | -0.62927500 |
| C | -2.57570000 | 0.79822300  | 0.47763400  |
| O | 1.29809000  | 1.77374300  | -0.65824900 |
| H | -1.45576000 | -0.79930900 | 1.36844800  |
| H | 0.56101100  | -1.72101100 | 0.66733700  |
| H | 1.15692800  | -1.51796700 | -1.74822100 |
| H | 2.35651200  | -0.28382700 | -1.34593100 |
| H | 2.54397800  | -1.93765000 | -0.73522500 |
| H | 1.38860000  | -0.10403300 | 2.36099100  |
| H | 2.69709600  | -1.07504600 | 1.67508400  |
| H | 2.47620800  | 0.60727100  | 1.15985800  |
| H | -1.24639700 | -2.21635000 | -0.69399200 |
| H | -2.92837800 | -1.81519700 | -0.34011300 |



|   |             |             |             |
|---|-------------|-------------|-------------|
| H | -2.06784300 | -0.95658000 | -1.62678300 |
| H | -3.53992700 | 0.37398200  | 0.77244700  |
| H | -2.29114500 | 1.55435100  | 1.21192200  |
| H | -2.70149900 | 1.30331600  | -0.48227600 |
| H | 1.17617400  | 2.68031800  | -0.95771500 |

### 101-radical

|   |             |             |             |
|---|-------------|-------------|-------------|
| C | -0.09993600 | 0.14273600  | 0.07670800  |
| C | -1.50057200 | -0.33301200 | 0.40950700  |
| C | 1.10351400  | -0.76893900 | 0.31119300  |
| O | 1.04393800  | 1.98394900  | -0.74974000 |
| N | 0.05947400  | 1.32432000  | -0.39464800 |
| C | 1.87381800  | -1.05310700 | -0.98859700 |
| C | 2.02408200  | -0.19368400 | 1.40228800  |
| C | -1.94324800 | -1.45396400 | -0.55362500 |
| C | -2.53205700 | 0.79931900  | 0.44522300  |
| H | -1.44050000 | -0.77189900 | 1.41559900  |
| H | 0.69562900  | -1.71634300 | 0.68002100  |
| H | 1.23055300  | -1.51738600 | -1.74036100 |
| H | 2.28081100  | -0.13170800 | -1.41213700 |
| H | 2.70946700  | -1.73075100 | -0.79098100 |
| H | 1.48361300  | -0.04145000 | 2.34026100  |
| H | 2.85324200  | -0.88010900 | 1.59624000  |
| H | 2.44579600  | 0.76563800  | 1.09231700  |
| H | -1.22693200 | -2.27906200 | -0.58207900 |
| H | -2.90820700 | -1.86328100 | -0.24198400 |
| H | -2.05152000 | -1.06465400 | -1.57012400 |
| H | -3.51060600 | 0.40721300  | 0.73447900  |
| H | -2.24916600 | 1.57582900  | 1.15936500  |
| H | -2.63360600 | 1.27002700  | -0.53634800 |

### Entry 102

|   |             |             |             |
|---|-------------|-------------|-------------|
| C | 0.07315300  | 0.26969100  | 0.00000200  |
| C | -1.42455200 | -0.08717300 | -0.00000100 |
| C | 1.10211500  | -0.86034700 | -0.00000500 |
| N | 0.33459800  | 1.52018100  | 0.00001000  |
| C | 1.96700000  | -0.87121400 | -1.27650700 |
| C | 1.96699300  | -0.87123800 | 1.27650100  |
| C | -1.75002900 | -0.91764700 | 1.26376500  |
| C | -2.31432500 | 1.16840100  | 0.00003700  |
| C | -1.75004300 | -0.91757800 | -1.26380900 |
| O | 1.72096900  | 1.81382500  | 0.00000700  |
| H | 0.53378800  | -1.79401500 | -0.00001500 |
| H | 1.34743900  | -0.90544500 | -2.17650600 |
| H | 2.60125500  | 0.01269300  | -1.33272900 |
| H | 2.60708000  | -1.75881500 | -1.27704700 |

|   |             |             |             |
|---|-------------|-------------|-------------|
| H | 2.60707100  | -1.75884200 | 1.27703000  |
| H | 2.60125100  | 0.01266600  | 1.33274300  |
| H | 1.34742700  | -0.90548300 | 2.17649600  |
| H | -2.80991900 | -1.18861200 | 1.26434300  |
| H | -1.17402100 | -1.84448000 | 1.31536300  |
| H | -1.55035300 | -0.34110900 | 2.17108400  |
| H | -2.13239400 | 1.78701300  | -0.88028700 |
| H | -3.36585600 | 0.86581900  | 0.00003200  |
| H | -2.13238800 | 1.78696300  | 0.88039500  |
| H | -2.80993500 | -1.18853800 | -1.26439200 |
| H | -1.55037200 | -0.34099300 | -2.17109900 |
| H | -1.17404100 | -1.84441200 | -1.31546100 |
| H | 1.72214900  | 2.77634800  | 0.00001100  |

### 102-radical

|   |             |             |             |
|---|-------------|-------------|-------------|
| C | 0.08747600  | 0.23283800  | 0.00015800  |
| C | -1.40178100 | -0.11602500 | -0.00005900 |
| C | 1.17459700  | -0.84390000 | -0.00028000 |
| O | 1.50371900  | 2.07235800  | 0.00055400  |
| N | 0.42321700  | 1.47067300  | 0.00045600  |
| C | 2.03818700  | -0.77040300 | -1.27183000 |
| C | 2.03781700  | -0.77184600 | 1.27160200  |
| C | -1.73367200 | -0.94567000 | 1.26207400  |
| C | -2.26625900 | 1.15654800  | -0.00012000 |
| C | -1.73330200 | -0.94556000 | -1.26236100 |
| H | 0.65836300  | -1.80811500 | -0.00089700 |
| H | 1.43186400  | -0.88300600 | -2.17395500 |
| H | 2.56571300  | 0.18451000  | -1.33321500 |
| H | 2.78629900  | -1.56837800 | -1.26412600 |
| H | 1.43122700  | -0.88546200 | 2.17342100  |
| H | 2.78591800  | -1.56982400 | 1.26321400  |
| H | 2.56534000  | 0.18298700  | 1.33422500  |
| H | -2.79289300 | -1.21910300 | 1.26050400  |
| H | -1.15541300 | -1.87171000 | 1.31055300  |
| H | -1.53431900 | -0.37178100 | 2.17097800  |
| H | -2.07315400 | 1.76999600  | -0.88314200 |
| H | -3.32496900 | 0.88268500  | -0.00028600 |
| H | -2.07340600 | 1.76991000  | 0.88301600  |
| H | -2.79251300 | -1.21903400 | -1.26111000 |
| H | -1.53371400 | -0.37157900 | -2.17115400 |
| H | -1.15498800 | -1.87157300 | -1.31076000 |

### Entry 103

|   |             |             |             |
|---|-------------|-------------|-------------|
| C | -0.02565600 | 0.38083600  | -0.04946200 |
| C | -1.51791800 | -0.06891000 | -0.00993500 |
| C | 1.21016200  | -0.56837500 | -0.00150300 |

|   |             |             |             |
|---|-------------|-------------|-------------|
| N | 0.06539600  | 1.65951700  | -0.05901800 |
| C | -1.84017600 | -0.67388000 | 1.37811100  |
| H | -2.89445000 | -0.96508200 | 1.41355700  |
| H | -1.24873300 | -1.55875200 | 1.61230300  |
| H | -1.66994400 | 0.06471400  | 2.16597400  |
| C | -2.46262600 | 1.14108300  | -0.19842900 |
| H | -2.30811600 | 1.62509300  | -1.16462600 |
| H | -3.49629000 | 0.78525500  | -0.15190300 |
| H | -2.32117800 | 1.89568500  | 0.57463500  |
| C | 1.94748700  | -0.33526700 | 1.34308000  |
| H | 1.31968300  | -0.63831700 | 2.18592900  |
| H | 2.85624100  | -0.94475400 | 1.36892200  |
| H | 2.22915100  | 0.70674000  | 1.47846900  |
| C | 2.15215300  | -0.26461200 | -1.19705100 |
| H | 1.62725800  | -0.41166100 | -2.14564400 |
| H | 2.54355800  | 0.74797100  | -1.17487400 |
| H | 2.99360000  | -0.96407100 | -1.17283500 |
| C | 0.91278300  | -2.08223300 | -0.09265600 |
| H | 0.54351800  | -2.37225900 | -1.07638100 |
| H | 1.85548700  | -2.61455000 | 0.06315000  |
| H | 0.21576200  | -2.44149400 | 0.66366500  |
| C | -1.86680300 | -1.07564900 | -1.13308600 |
| H | -1.51418500 | -0.72004900 | -2.10560600 |
| H | -1.46330500 | -2.07095400 | -0.96352100 |
| H | -2.95417000 | -1.17495800 | -1.19534300 |
| O | 1.37232500  | 2.19678600  | -0.02044400 |
| H | 1.19331100  | 3.14258100  | -0.03360600 |

### 103-radical

|   |             |             |             |
|---|-------------|-------------|-------------|
| C | -0.02823300 | 0.35294600  | -0.05465600 |
| C | -1.50056800 | -0.11657600 | -0.01057000 |
| C | 1.27227900  | -0.50890900 | -0.00312100 |
| O | 1.07164400  | 2.41627400  | -0.02092100 |
| N | 0.12176700  | 1.62941000  | -0.04909200 |
| C | -1.80663800 | -0.78591800 | 1.35078100  |
| H | -2.85800600 | -1.08734800 | 1.38453700  |
| H | -1.20483500 | -1.67741100 | 1.52901100  |
| H | -1.63066800 | -0.08793400 | 2.17354000  |
| C | -2.43930500 | 1.10271500  | -0.14741100 |
| H | -2.29425800 | 1.61623800  | -1.10067500 |
| H | -3.47749000 | 0.76296500  | -0.09850700 |
| H | -2.28233600 | 1.82886500  | 0.65262700  |
| C | 1.94942300  | -0.25607800 | 1.36516100  |
| H | 1.32613800  | -0.62210200 | 2.18536200  |
| H | 2.90712900  | -0.78365500 | 1.40787900  |
| H | 2.14399000  | 0.80571800  | 1.52752200  |

|   |             |             |             |
|---|-------------|-------------|-------------|
| C | 2.21963300  | -0.06875800 | -1.14372200 |
| H | 1.76256100  | -0.24865700 | -2.12079400 |
| H | 2.48490100  | 0.98648300  | -1.07894800 |
| H | 3.14429400  | -0.65132100 | -1.09264500 |
| C | 1.05800800  | -2.02674000 | -0.16459000 |
| H | 0.69834300  | -2.28600800 | -1.16093100 |
| H | 2.02524200  | -2.51992600 | -0.03228900 |
| H | 0.37803000  | -2.44938700 | 0.57499600  |
| C | -1.84214700 | -1.08474200 | -1.16751500 |
| H | -1.55413100 | -0.65959300 | -2.13305500 |
| H | -1.36624600 | -2.05803100 | -1.06439700 |
| H | -2.92289500 | -1.25258900 | -1.18835900 |

#### Entry 104

|   |             |             |             |
|---|-------------|-------------|-------------|
| C | 1.31233100  | 0.29484200  | -0.19542000 |
| C | 2.55990300  | -0.60982400 | -0.00496400 |
| N | 1.31378300  | 1.57425300  | -0.16756100 |
| C | 3.62367400  | -0.26404700 | -1.07722500 |
| C | 3.14055300  | -0.40045600 | 1.41514300  |
| C | 2.24444000  | -2.11339100 | -0.16438500 |
| C | -0.06102100 | -0.33284000 | -0.43022500 |
| C | -1.09035900 | 0.47211600  | -1.27586200 |
| C | -0.76609700 | -0.77394300 | 0.89267400  |
| C | -1.71087800 | 1.66352500  | -0.51580500 |
| C | -2.23094800 | -0.50278900 | -1.65211400 |
| C | -1.33987800 | 0.44455800  | 1.64405700  |
| C | -1.91196400 | -1.73901800 | 0.52290000  |
| C | -2.39040000 | 1.16093000  | 0.77109800  |
| C | -2.93351800 | -1.01337100 | -0.37521100 |
| C | -3.52147200 | 0.18047700  | 0.40404300  |
| O | 2.57465100  | 2.17395000  | 0.07594100  |
| H | 3.21836200  | -0.40402600 | -2.08390100 |
| H | 3.97653200  | 0.76040700  | -0.98901900 |
| H | 4.47823700  | -0.93893900 | -0.96633900 |
| H | 2.41618600  | -0.69466100 | 2.18022900  |
| H | 4.02975800  | -1.02624900 | 1.54092100  |
| H | 3.42128700  | 0.63680800  | 1.58749000  |
| H | 1.48919800  | -2.46820400 | 0.53949200  |
| H | 1.91672800  | -2.36211000 | -1.17689400 |
| H | 3.15977000  | -2.68074800 | 0.02602600  |
| H | 0.12972400  | -1.24724400 | -0.99762800 |
| H | -0.59668700 | 0.83420800  | -2.18316700 |
| H | -0.05215900 | -1.29114800 | 1.54077100  |
| H | -2.45174800 | 2.14983900  | -1.16248200 |
| H | -0.94463000 | 2.40055600  | -0.27971500 |
| H | -1.83719400 | -1.34809900 | -2.22923800 |

|   |             |             |             |
|---|-------------|-------------|-------------|
| H | -2.95552200 | 0.00943400  | -2.29576100 |
| H | -0.53823600 | 1.14049400  | 1.90933500  |
| H | -1.79505300 | 0.10609100  | 2.58250300  |
| H | -1.51020900 | -2.62020800 | 0.00882300  |
| H | -2.40455000 | -2.09806900 | 1.43424100  |
| H | -2.80525800 | 2.01057300  | 1.32460600  |
| H | -3.73579400 | -1.70658200 | -0.65146500 |
| H | -4.02675200 | -0.17697000 | 1.30948300  |
| H | -4.27822500 | 0.69180500  | -0.20264400 |
| H | 2.35635300  | 3.11105600  | 0.04749800  |

#### 104-radical

|   |             |             |             |
|---|-------------|-------------|-------------|
| C | 1.33766500  | 0.27154300  | 0.00005200  |
| C | 2.65540400  | -0.54449800 | 0.00011200  |
| O | 2.11354200  | 2.49250100  | -0.00016700 |
| N | 1.31340300  | 1.55201600  | -0.00008100 |
| C | 2.69242800  | -1.43445400 | -1.26422700 |
| C | 3.90641400  | 0.35114900  | -0.00038100 |
| C | 2.69283200  | -1.43362300 | 1.26502400  |
| C | 0.00261400  | -0.46566900 | 0.00003700  |
| C | -0.88140700 | -0.23481600 | -1.26266400 |
| C | -0.88149800 | -0.23475000 | 1.26266200  |
| C | -1.52149500 | 1.16789200  | -1.25721300 |
| C | -2.00245100 | -1.29699700 | -1.25935900 |
| C | -1.52159500 | 1.16795300  | 1.25709800  |
| C | -2.00254200 | -1.29693300 | 1.25932600  |
| C | -2.39761300 | 1.33944300  | -0.00009600 |
| C | -2.87781200 | -1.13274600 | -0.00005200 |
| C | -3.51132600 | 0.27310100  | -0.00011400 |
| H | 1.84875100  | -2.12651600 | -1.31237500 |
| H | 2.68613700  | -0.82525500 | -2.17177900 |
| H | 3.60894500  | -2.03224300 | -1.26623100 |
| H | 3.95077800  | 0.99225200  | 0.88173600  |
| H | 4.79712200  | -0.28406000 | -0.00029900 |
| H | 3.95051100  | 0.99165100  | -0.88294800 |
| H | 2.68681500  | -0.82382600 | 2.17217600  |
| H | 1.84918200  | -2.12566600 | 1.31389100  |
| H | 3.60936000  | -2.03139700 | 1.26713800  |
| H | 0.26106100  | -1.52767700 | 0.00007400  |
| H | -0.26495300 | -0.35489200 | -2.15979200 |
| H | -0.26510900 | -0.35478200 | 2.15984100  |
| H | -2.13190900 | 1.28808800  | -2.16019900 |
| H | -0.75243400 | 1.94381500  | -1.29035300 |
| H | -1.56966400 | -2.30420300 | -1.29039400 |
| H | -2.61772700 | -1.18788200 | -2.15993500 |
| H | -0.75254500 | 1.94388500  | 1.29026900  |

|   |             |             |             |
|---|-------------|-------------|-------------|
| H | -2.13208500 | 1.28818200  | 2.16003000  |
| H | -1.56975800 | -2.30413700 | 1.29044500  |
| H | -2.61788400 | -1.18777000 | 2.15985200  |
| H | -2.84465100 | 2.33924200  | -0.00013800 |
| H | -3.66572500 | -1.89388500 | -0.00006100 |
| H | -4.15207900 | 0.39671600  | 0.88089600  |
| H | -4.15200700 | 0.39667000  | -0.88118300 |

### Entry 105

|   |             |             |             |
|---|-------------|-------------|-------------|
| C | 1.46453600  | 0.44308400  | 0.00003500  |
| C | 2.72642900  | -0.45952900 | 0.00000300  |
| N | 1.74684200  | 1.68812000  | 0.00000900  |
| C | 4.02768900  | 0.36404600  | 0.00000700  |
| C | 2.72639300  | -1.34892500 | 1.26584800  |
| C | 2.72638500  | -1.34888900 | -1.26586800 |
| C | 0.11282200  | -0.28496000 | 0.00005100  |
| C | -0.79502300 | -0.16229900 | -1.26594700 |
| C | -0.79509600 | -0.16228000 | 1.26599900  |
| C | -1.69360100 | 1.09138400  | -1.26209300 |
| C | -1.71040700 | -1.41117600 | -1.26684600 |
| C | -1.69370600 | 1.09138200  | 1.26210200  |
| C | -1.71047700 | -1.41116200 | 1.26684900  |
| C | -2.58089600 | 1.09870100  | -0.00003100 |
| C | -2.59391200 | -1.41567600 | -0.00002400 |
| C | -3.47949700 | -0.15371900 | -0.00006400 |
| O | 0.64366700  | 2.56823100  | -0.00000400 |
| H | 4.09743000  | 1.00522300  | -0.88007900 |
| H | 4.09745300  | 1.00518100  | 0.88012000  |
| H | 4.88310100  | -0.31839300 | -0.00002100 |
| H | 1.85567700  | -2.00583700 | 1.32357800  |
| H | 3.61610500  | -1.98546800 | 1.26783000  |
| H | 2.75074900  | -0.73601600 | 2.17099700  |
| H | 1.85568500  | -2.00582000 | -1.32360300 |
| H | 2.75071400  | -0.73595600 | -2.17100100 |
| H | 3.61611200  | -1.98541200 | -1.26788400 |
| H | 0.41620300  | -1.33263300 | 0.00007700  |
| H | -0.16947400 | -0.16624900 | -2.16428100 |
| H | -0.16959800 | -0.16622400 | 2.16436800  |
| H | -2.32804100 | 1.06893800  | -2.15685200 |
| H | -1.09254800 | 1.99729700  | -1.30956600 |
| H | -1.10782500 | -2.32608600 | -1.31385500 |
| H | -2.34513400 | -1.40333300 | -2.16035500 |
| H | -1.09268600 | 1.99730800  | 1.30965200  |
| H | -2.32822000 | 1.06888900  | 2.15680700  |
| H | -1.10789700 | -2.32607200 | 1.31389800  |
| H | -2.34525400 | -1.40331600 | 2.16032200  |

|   |             |             |             |
|---|-------------|-------------|-------------|
| H | -3.20539000 | 1.99890500  | -0.00005600 |
| H | -3.22531800 | -2.31132900 | -0.00003600 |
| H | -4.13264700 | -0.15239800 | 0.88086000  |
| H | -4.13257800 | -0.15240600 | -0.88103900 |
| H | 1.07632100  | 3.42862700  | -0.00003300 |

### 105-radical

|   |             |             |             |
|---|-------------|-------------|-------------|
| C | -1.40684100 | 0.44117400  | -0.15671400 |
| C | -2.61926900 | -0.51144500 | -0.00460400 |
| O | -1.11553800 | 2.77605000  | -0.04069300 |
| N | -1.68238600 | 1.68235700  | 0.01002300  |
| C | -2.58945300 | -1.61630600 | -1.08321400 |
| C | -2.64204000 | -1.14777100 | 1.40630000  |
| C | -3.93512400 | 0.27654900  | -0.18118700 |
| C | -0.02426200 | -0.04704600 | -0.62226600 |
| C | 0.59318500  | -1.20596200 | 0.22061800  |
| C | 1.06444400  | 1.04894000  | -0.78856700 |
| C | 1.09786400  | -0.69161000 | 1.58314900  |
| C | 1.77592800  | -1.80586500 | -0.57040200 |
| C | 1.58703200  | 1.54573700  | 0.57804000  |
| C | 2.24633100  | 0.44178300  | -1.57766100 |
| C | 2.19129300  | 0.37219600  | 1.36865900  |
| C | 2.85861500  | -0.73477000 | -0.79279200 |
| C | 3.36455300  | -0.23674700 | 0.57599700  |
| H | -2.60221900 | -1.18621300 | -2.08885000 |
| H | -1.71769000 | -2.26788200 | -1.00403500 |
| H | -3.47811600 | -2.24545200 | -0.98169400 |
| H | -2.68993200 | -0.37242100 | 2.17527900  |
| H | -3.52810800 | -1.78148000 | 1.51213200  |
| H | -1.76707600 | -1.76710400 | 1.60567300  |
| H | -4.04254500 | 1.05742000  | 0.57412000  |
| H | -3.98605400 | 0.75109300  | -1.16425800 |
| H | -4.78463900 | -0.40569900 | -0.08601800 |
| H | -0.21416900 | -0.45838100 | -1.62342300 |
| H | -0.14682600 | -1.99127300 | 0.37894300  |
| H | 0.65487000  | 1.89052000  | -1.35125500 |
| H | 1.49358600  | -1.53204600 | 2.16557600  |
| H | 0.27128100  | -0.26548300 | 2.16200300  |
| H | 1.42417000  | -2.19630200 | -1.53283000 |
| H | 2.19253600  | -2.65485100 | -0.01606300 |
| H | 0.78697000  | 2.01848300  | 1.15171400  |
| H | 2.34497200  | 2.31940700  | 0.40921100  |
| H | 1.90980500  | 0.10258700  | -2.56454600 |
| H | 3.00338400  | 1.21513900  | -1.74988000 |
| H | 2.54948100  | 0.72983500  | 2.34001800  |
| H | 3.69063900  | -1.16401700 | -1.36163900 |

|   |            |             |            |
|---|------------|-------------|------------|
| H | 4.15195100 | 0.51315500  | 0.43707000 |
| H | 3.81120100 | -1.06707100 | 1.13598900 |

**Entry 106**

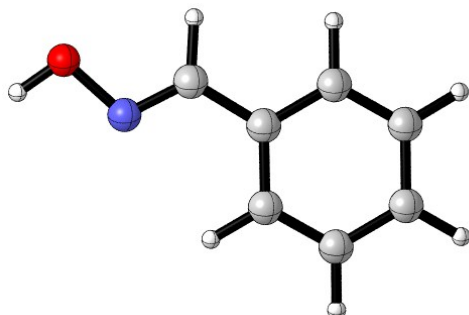

|   |            |            |            |
|---|------------|------------|------------|
| C | -1.4506638 | 1.0289574  | -0.0001690 |
| N | -2.5890448 | 0.4522614  | 0.0000450  |
| H | -1.3927718 | 2.1192474  | -0.0005120 |
| C | -0.1968828 | 0.2687814  | -0.0000460 |
| C | 1.0160182  | 0.9707194  | -0.0002920 |
| C | -0.1687608 | -1.1355856 | 0.0003160  |
| C | 2.2313852  | 0.2897534  | -0.0001730 |
| H | 1.0050332  | 2.0558354  | -0.0005730 |
| C | 1.0442552  | -1.8111086 | 0.0004310  |
| H | -1.1039568 | -1.6815626 | 0.0005060  |
| C | 2.2490552  | -1.1026226 | 0.0001880  |
| H | 3.1615452  | 0.8465604  | -0.0003630 |
| H | 1.0549032  | -2.8953376 | 0.0007130  |
| H | 3.1933072  | -1.6352156 | 0.0002790  |
| O | -3.6316198 | 1.3901834  | -0.0002450 |
| H | -4.4218018 | 0.8391334  | -0.0001050 |

**106-radical**

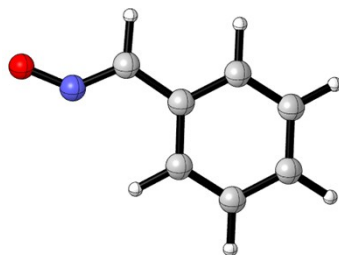

|   |            |            |            |
|---|------------|------------|------------|
| C | -1.6698250 | 1.2080048  | -0.0000569 |
| O | -3.9827100 | 1.1757138  | 0.0004461  |
| N | -2.8526180 | 0.7027928  | 0.0002981  |
| H | -1.5814060 | 2.2940798  | -0.0002649 |
| C | -0.4628920 | 0.3849058  | -0.0000359 |
| C | 0.7864030  | 1.0215378  | -0.0004019 |
| C | -0.5074480 | -1.0190552 | 0.0003401  |



|   |            |            |            |
|---|------------|------------|------------|
| C | 1.9627670  | 0.2764208  | -0.0004129 |
| H | 0.8348260  | 2.1055288  | -0.0006889 |
| C | 0.6680840  | -1.7580312 | 0.0003301  |
| H | -1.4672490 | -1.5228022 | 0.0006321  |
| C | 1.9085910  | -1.1152872 | -0.0000459 |
| H | 2.9204890  | 0.7842018  | -0.0007049 |
| H | 0.6198060  | -2.8411182 | 0.0006161  |
| H | 2.8231820  | -1.6968922 | -0.0000499 |

**Entry 107**

|   |             |             |             |
|---|-------------|-------------|-------------|
| C | -0.09327300 | -0.39923700 | 0.00004900  |
| C | 0.98586200  | -1.30259000 | -0.00003300 |
| C | 2.30091400  | -0.85427100 | -0.00008400 |
| C | 2.56728900  | 0.51445100  | -0.00003700 |
| C | 1.50957300  | 1.42259100  | 0.00005900  |
| C | 0.18998300  | 0.97961800  | 0.00009800  |
| C | -1.43670100 | -0.99217900 | 0.00010300  |
| N | -2.62090100 | -0.50287800 | 0.00002100  |
| O | -2.66303300 | 0.89986000  | -0.00013900 |
| H | 0.78370100  | -2.36864900 | -0.00005900 |
| H | 3.11575700  | -1.56928900 | -0.00015500 |
| H | 3.59146400  | 0.87027100  | -0.00007300 |
| H | 1.71199600  | 2.48783000  | 0.00010200  |
| H | -0.62004400 | 1.69131400  | 0.00016700  |
| H | -1.46494500 | -2.07997500 | 0.00024000  |
| H | -3.60924500 | 1.07946200  | -0.00018800 |

**107-radical**

|   |             |             |             |
|---|-------------|-------------|-------------|
| C | 0.12658300  | -0.42300200 | 0.00000500  |
| C | -0.96147400 | -1.31273200 | -0.00005400 |
| C | -2.26649200 | -0.83523700 | -0.00012200 |
| C | -2.50841400 | 0.53864100  | -0.00013200 |
| C | -1.43544500 | 1.42921400  | -0.00007400 |
| C | -0.12594700 | 0.95827500  | -0.00000600 |
| C | 1.47622000  | -0.98963900 | 0.00007600  |
| N | 2.57822400  | -0.32303400 | 0.00013700  |
| O | 2.85485400  | 0.87258500  | 0.00015600  |
| H | -0.77706100 | -2.38185400 | -0.00004700 |
| H | -3.09523700 | -1.53408000 | -0.00016800 |
| H | -3.52594800 | 0.91219200  | -0.00018500 |
| H | -1.61779200 | 2.49778700  | -0.00008100 |
| H | 0.69937200  | 1.65909900  | 0.00003900  |
| H | 1.60008300  | -2.06569000 | 0.00007600  |

**Entry 108**

|   |            |            |            |
|---|------------|------------|------------|
| C | 1.26389100 | 0.19776000 | 0.04618600 |
|---|------------|------------|------------|

|   |             |             |             |
|---|-------------|-------------|-------------|
| N | 1.93110800  | -0.87002400 | -0.20249700 |
| C | -0.21621400 | 0.05852600  | 0.02653900  |
| C | -1.03545300 | 1.17959800  | -0.16492100 |
| C | -0.82683200 | -1.19560700 | 0.19089000  |
| C | -2.42300700 | 1.05181100  | -0.20198500 |
| H | -0.59362300 | 2.15931900  | -0.30055900 |
| C | -2.21016300 | -1.31991300 | 0.15825000  |
| H | -0.20198300 | -2.06527200 | 0.34772100  |
| C | -3.01603000 | -0.19696500 | -0.03928200 |
| H | -3.03826400 | 1.93083700  | -0.35814400 |
| H | -2.66394000 | -2.29548200 | 0.29346900  |
| H | -4.09540100 | -0.29622300 | -0.06156200 |
| C | 1.90211400  | 1.53331000  | 0.32870000  |
| H | 2.02782700  | 2.10361400  | -0.59800500 |
| H | 1.28782200  | 2.12313700  | 1.00947000  |
| H | 2.89090300  | 1.39422600  | 0.76243100  |
| O | 3.32138900  | -0.65948400 | -0.17351700 |
| H | 3.66795300  | -1.53924100 | -0.35546300 |

#### 108-radical

|   |             |             |             |
|---|-------------|-------------|-------------|
| C | -1.31027600 | 0.25092500  | -0.00003700 |
| O | -3.26318100 | -1.00049800 | 0.00012000  |
| N | -2.04960600 | -0.80650200 | 0.00012900  |
| C | 0.15499200  | 0.07847200  | -0.00000700 |
| C | 1.00168400  | 1.19635800  | 0.00027700  |
| C | 0.74027100  | -1.20045300 | -0.00027600 |
| C | 2.38730500  | 1.04213800  | 0.00031500  |
| H | 0.58573600  | 2.19614000  | 0.00048900  |
| C | 2.11980200  | -1.35017100 | -0.00023400 |
| H | 0.10129000  | -2.07576900 | -0.00052700 |
| C | 2.95316800  | -0.22884400 | 0.00006100  |
| H | 3.02249400  | 1.92077000  | 0.00054500  |
| H | 2.54974800  | -2.34551500 | -0.00044700 |
| H | 4.03043300  | -0.34854900 | 0.00008500  |
| C | -1.95892000 | 1.61428000  | -0.00027000 |
| H | -1.66115800 | 2.18552300  | 0.88376500  |
| H | -1.66048400 | 2.18552700  | -0.88406900 |
| H | -3.04352600 | 1.51514800  | -0.00067000 |

#### Entry 109

|   |            |             |             |
|---|------------|-------------|-------------|
| C | 1.49566000 | 0.35931200  | 0.00148700  |
| N | 2.32933200 | -0.61280700 | -0.00274500 |
| C | 2.06384500 | 1.75229100  | 0.00755900  |
| C | 0.00536700 | 0.19366000  | 0.00081200  |
| O | 1.81482200 | -1.90260600 | -0.00827700 |

|   |             |             |             |
|---|-------------|-------------|-------------|
| C | -0.70191200 | 0.12202900  | 1.20814800  |
| C | -2.08947100 | -0.00822600 | 1.20623400  |
| C | -2.78535500 | -0.06513700 | -0.00018000 |
| C | -2.08981600 | 0.00483600  | -1.20610900 |
| C | -0.70226700 | 0.13514800  | -1.20702200 |
| H | 3.15323200  | 1.71065400  | 0.00747900  |
| H | 1.72347100  | 2.30336200  | 0.89029700  |
| H | 1.72365500  | 2.31096000  | -0.87046700 |
| H | 0.84118100  | -1.86205700 | -0.00810000 |
| H | -0.16216100 | 0.16556900  | 2.14792400  |
| H | -2.62570500 | -0.06415400 | 2.14677000  |
| H | -3.86474100 | -0.16532500 | -0.00057300 |
| H | -2.62632600 | -0.04089500 | -2.14703900 |
| H | -0.16281100 | 0.18890000  | -2.14643900 |

### 109-radical

|   |             |             |             |
|---|-------------|-------------|-------------|
| C | -1.46798900 | -0.35681900 | -0.00319600 |
| N | -2.25328700 | 0.65965600  | 0.00619300  |
| C | -2.06773400 | -1.73535800 | -0.01588500 |
| C | 0.01833600  | -0.17851100 | -0.00165200 |
| O | -2.09126900 | 1.87916700  | 0.01737100  |
| C | 0.72085700  | -0.11506400 | 1.20614500  |
| C | 2.10618800  | 0.03554400  | 1.20629800  |
| C | 2.80061400  | 0.12321300  | 0.00101400  |
| C | 2.10568200  | 0.06154500  | -1.20559100 |
| C | 0.72034400  | -0.08901200 | -1.20809500 |
| H | -3.15722000 | -1.68321900 | -0.01462700 |
| H | -1.73939300 | -2.30635900 | 0.85861000  |
| H | -1.74066000 | -2.28957600 | -0.90158500 |
| H | 0.18171300  | -0.17692500 | 2.14509700  |
| H | 2.64141000  | 0.08732400  | 2.14772800  |
| H | 3.87823200  | 0.24157400  | 0.00207300  |
| H | 2.64050800  | 0.13362900  | -2.14590800 |
| H | 0.18078400  | -0.13061600 | -2.14792500 |

### Entry 110

|   |             |             |             |
|---|-------------|-------------|-------------|
| C | -1.36351700 | 0.21114100  | 0.04245800  |
| C | -1.46649300 | -1.06984300 | 0.60211600  |
| C | -2.69806400 | -1.71776700 | 0.67028400  |
| C | -3.84327800 | -1.10132500 | 0.17178700  |
| C | -3.74969200 | 0.17099800  | -0.39456400 |
| C | -2.52313500 | 0.82185500  | -0.46038100 |
| C | -0.05233700 | 0.91524100  | 0.00283500  |
| N | -0.11029600 | 2.19965800  | 0.00261100  |
| C | 1.21114700  | 0.12118900  | -0.03920900 |
| C | 2.21552400  | 0.30680500  | 0.91820700  |

|   |             |             |             |
|---|-------------|-------------|-------------|
| C | 1.39861000  | -0.83607400 | -1.04367700 |
| C | 3.37966900  | -0.45524700 | 0.87384400  |
| C | 2.57208400  | -1.58449700 | -1.09747400 |
| C | 3.56345600  | -1.39953200 | -0.13554500 |
| H | -0.58198000 | -1.55672900 | 0.99432000  |
| H | -2.76053100 | -2.70522700 | 1.11372200  |
| H | -4.80052900 | -1.60824500 | 0.21907800  |
| H | -4.63532200 | 0.65398200  | -0.79241100 |
| H | -2.44755400 | 1.80701700  | -0.90245200 |
| H | 2.08253400  | 1.04900600  | 1.69508000  |
| H | 0.62438000  | -0.99149700 | -1.78650000 |
| H | 4.14662600  | -0.30795900 | 1.62599900  |
| H | 2.70880100  | -2.31452200 | -1.88737900 |
| H | 4.47378000  | -1.98740200 | -0.17191700 |
| O | 1.14736200  | 2.81449800  | -0.08780800 |
| H | 0.91911500  | 3.75032600  | -0.08743000 |

### 110-radical

|   |             |             |             |
|---|-------------|-------------|-------------|
| C | -1.34536000 | 0.20159000  | 0.04171400  |
| C | -1.56600500 | -0.95890800 | 0.79642300  |
| C | -2.82781700 | -1.54611700 | 0.83811300  |
| C | -3.88793900 | -0.98605300 | 0.12694700  |
| C | -3.67794200 | 0.16814500  | -0.62662200 |
| C | -2.41747500 | 0.75612800  | -0.67164700 |
| C | -0.01287800 | 0.85872400  | 0.02844600  |
| N | -0.02174000 | 2.15341800  | 0.05334100  |
| O | 0.84182100  | 3.02660100  | 0.04055900  |
| C | 1.26032300  | 0.09562400  | -0.02507500 |
| C | 2.44674400  | 0.61503000  | 0.51499400  |
| C | 1.29863000  | -1.16144700 | -0.64998800 |
| C | 3.63213500  | -0.11060300 | 0.44450300  |
| C | 2.48913500  | -1.87766600 | -0.72762300 |
| C | 3.65950200  | -1.35802300 | -0.17708000 |
| H | -0.75197100 | -1.39368800 | 1.36413700  |
| H | -2.98376800 | -2.43875000 | 1.43342200  |
| H | -4.86916800 | -1.44577600 | 0.15856600  |
| H | -4.49529200 | 0.60775500  | -1.18715000 |
| H | -2.25416500 | 1.64761700  | -1.26583800 |
| H | 2.44335600  | 1.58688800  | 0.99204200  |
| H | 0.39689900  | -1.57249800 | -1.08622200 |
| H | 4.53749700  | 0.30286300  | 0.87414700  |
| H | 2.50200900  | -2.84176700 | -1.22344400 |
| H | 4.58589400  | -1.91792300 | -0.23614600 |

### Entry 111

|   |             |            |            |
|---|-------------|------------|------------|
| C | -1.19932000 | 0.56240500 | 0.00000600 |
|---|-------------|------------|------------|

|   |             |             |             |
|---|-------------|-------------|-------------|
| C | -0.94911700 | -0.82417400 | -0.00001400 |
| C | -2.00797800 | -1.72675600 | -0.00002800 |
| C | -3.31348900 | -1.22957300 | -0.00002200 |
| C | -3.55636500 | 0.14685200  | -0.00000200 |
| C | -2.49697400 | 1.05728000  | 0.00001200  |
| C | 0.10120800  | 1.27144900  | 0.00001800  |
| N | 0.14589000  | 2.55381800  | 0.00003700  |
| C | 1.15234900  | 0.22990400  | 0.00000500  |
| C | 2.54260200  | 0.31495900  | 0.00000800  |
| C | 0.50884800  | -1.03189900 | -0.00001500 |
| C | 3.28638400  | -0.86895200 | -0.00000800 |
| C | 1.25711700  | -2.20257600 | -0.00003100 |
| C | 2.65184500  | -2.11165400 | -0.00002800 |
| O | 1.45137200  | 3.05109600  | 0.00004800  |
| H | -1.83166500 | -2.79667500 | -0.00004300 |
| H | -4.14936300 | -1.92016600 | -0.00003300 |
| H | -4.57752700 | 0.51068900  | 0.00000200  |
| H | -2.67786600 | 2.12548300  | 0.00002800  |
| H | 3.03422000  | 1.27667300  | 0.00002300  |
| H | 4.36923400  | -0.81926400 | -0.00000600 |
| H | 0.77369500  | -3.17315800 | -0.00004600 |
| H | 3.24740100  | -3.01783600 | -0.00004000 |
| H | 1.31699800  | 4.00516500  | 0.00006300  |

### 111-radical

|   |             |             |             |
|---|-------------|-------------|-------------|
| C | -1.19588900 | 0.55263000  | 0.00003000  |
| C | -0.90443500 | -0.83061000 | -0.00011600 |
| C | -1.94046200 | -1.75995500 | -0.00024500 |
| C | -3.25866900 | -1.29973800 | -0.00022800 |
| C | -3.54035300 | 0.06986000  | -0.00008500 |
| C | -2.50860200 | 1.00998100  | 0.00004600  |
| C | 0.08271600  | 1.27605200  | 0.00015500  |
| N | 0.20422800  | 2.56113600  | 0.00030900  |
| O | 1.17388400  | 3.30987900  | 0.00041900  |
| C | 1.16246200  | 0.27773500  | 0.00006000  |
| C | 2.54381900  | 0.42732600  | 0.00010800  |
| C | 0.55722000  | -1.00151900 | -0.00010100 |
| C | 3.33378800  | -0.72525700 | -0.00000600 |
| C | 1.35497100  | -2.14071700 | -0.00021600 |
| C | 2.74465300  | -1.99218200 | -0.00016700 |
| H | -1.73468400 | -2.82451200 | -0.00035900 |
| H | -4.07497100 | -2.01306600 | -0.00032800 |
| H | -4.57110700 | 0.40506500  | -0.00007300 |
| H | -2.72660000 | 2.07185200  | 0.00016200  |
| H | 2.99671700  | 1.41192300  | 0.00023500  |
| H | 4.41378400  | -0.63528300 | 0.00003000  |

|   |            |             |             |
|---|------------|-------------|-------------|
| H | 0.91313000 | -3.13088000 | -0.00034200 |
| H | 3.37575500 | -2.87372200 | -0.00025500 |

**Entry 112**

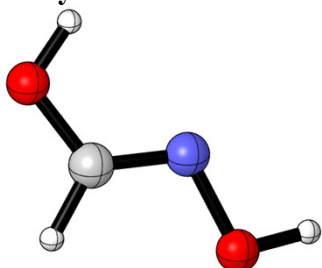

|   |            |            |            |
|---|------------|------------|------------|
| C | -0.6243573 | -0.0217079 | 0.0632519  |
| N | 0.6288737  | 0.1229791  | -0.0681091 |
| O | -1.4472283 | 1.0442571  | 0.1080789  |
| H | -1.1364813 | -0.9754509 | 0.1496679  |
| H | -0.9110083 | 1.8462821  | 0.0250689  |
| O | 1.2826457  | -1.1312329 | -0.0881491 |
| H | 2.2075557  | -0.8851269 | -0.1898091 |

**112-radical**

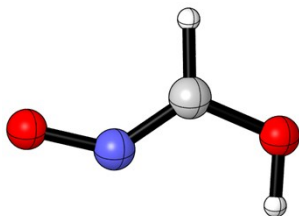

|   |            |            |            |
|---|------------|------------|------------|
| C | 0.1512182  | 0.3507337  | -0.0000005 |
| N | -0.8988398 | -0.3663753 | 0.0000695  |
| O | -2.1140738 | -0.0882723 | -0.0000135 |
| O | 1.3954052  | -0.1831183 | 0.0000185  |
| H | 0.1323142  | 1.4346177  | 0.0000305  |
| H | 1.3339762  | -1.1475853 | -0.0001045 |

**Entry 113**

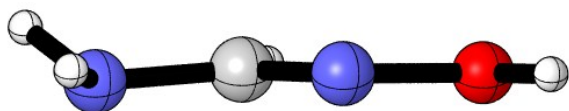

|   |            |            |            |
|---|------------|------------|------------|
| C | -0.1762404 | 0.3020661  | -0.0491614 |
| N | 0.7858386  | -0.5342659 | -0.0229714 |
| N | -1.4902764 | -0.1134859 | -0.1320474 |
| H | -2.1706624 | 0.4836061  | 0.3132376  |
| H | -1.6403914 | -1.0995249 | 0.0345936  |
| H | -0.0053044 | 1.3781411  | -0.0643334 |

|   |           |            |            |
|---|-----------|------------|------------|
| O | 2.0305346 | 0.1521171  | -0.0595474 |
| H | 2.6665016 | -0.5686539 | -0.0197704 |

### 113-radical

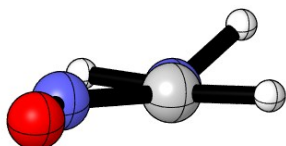

|   |            |            |            |
|---|------------|------------|------------|
| C | 0.1613584  | 0.3234174  | -0.0625577 |
| O | 2.4344144  | -0.0883766 | -0.0859667 |
| N | 1.2250644  | -0.3841806 | -0.0232817 |
| N | -1.1070516 | -0.2433206 | -0.1408417 |
| H | -1.8113166 | 0.2292594  | 0.4094533  |
| H | -1.1259416 | -1.2454846 | -0.0024617 |
| H | 0.2234724  | 1.4086854  | -0.0943437 |

### Entry 114

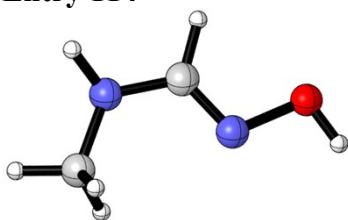

|   |            |            |            |
|---|------------|------------|------------|
| C | 0.3392255  | 0.8448722  | -0.0918943 |
| N | 1.3291805  | 0.0347252  | -0.0611023 |
| N | -0.9586315 | 0.4033082  | -0.1201323 |
| H | 0.4820485  | 1.9243742  | -0.1352563 |
| O | 2.5486195  | 0.7707012  | -0.1343373 |
| H | 3.2116225  | 0.0754392  | -0.0873983 |
| C | -1.2665585 | -1.0050028 | 0.0777357  |
| H | -0.7601845 | -1.5982058 | -0.6856753 |
| H | -0.9385315 | -1.3712248 | 1.0582407  |
| H | -2.3430945 | -1.1472268 | -0.0213593 |
| H | -1.6436965 | 1.0682402  | 0.2011787  |

### 114-radical

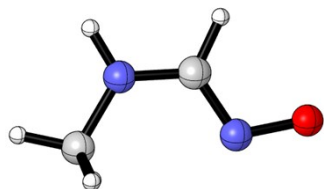

|   |            |            |            |
|---|------------|------------|------------|
| C | 0.8848298  | 0.6543250  | 0.0028137  |
| N | 1.6266848  | -0.4504430 | -0.0005253 |
| N | -0.4526272 | 0.5797260  | 0.0018027  |

|   |            |            |            |
|---|------------|------------|------------|
| H | 1.3466328  | 1.6414680  | 0.0064827  |
| O | 2.8941048  | -0.1941510 | 0.0011417  |
| C | -1.1913072 | -0.6799540 | -0.0030673 |
| H | -0.9408622 | -1.2657110 | -0.8893483 |
| H | -0.9401892 | -1.2728360 | 0.8782527  |
| H | -2.2573592 | -0.4558850 | -0.0017723 |
| H | -0.9699072 | 1.4434610  | 0.0042197  |

### Entry 115

|   |             |             |             |
|---|-------------|-------------|-------------|
| C | -1.14825300 | 0.92141700  | 0.00005200  |
| C | -1.63679600 | -0.55310200 | 0.00009700  |
| C | -0.22024300 | -0.20654700 | -0.00005800 |
| N | 0.94467400  | -0.68027300 | -0.00003300 |
| O | 1.91941000  | 0.35271300  | -0.00007800 |
| H | -1.26337600 | 1.49561800  | -0.91379500 |
| H | -1.26312400 | 1.49563100  | 0.91392200  |
| H | -2.07746700 | -0.93870800 | -0.91394100 |
| H | -2.07724500 | -0.93876900 | 0.91421700  |
| H | 2.74496400  | -0.14417900 | -0.00008800 |

### 115-radical

|   |             |             |             |
|---|-------------|-------------|-------------|
| C | -1.23255200 | 0.87886800  | 0.00020900  |
| C | -1.53271400 | -0.64462200 | 0.00019000  |
| C | -0.16997500 | -0.13407400 | -0.00018400 |
| N | 1.05465200  | -0.42161700 | -0.00014600 |
| H | -1.41960000 | 1.43248400  | -0.91491600 |
| H | -1.41899600 | 1.43238600  | 0.91551700  |
| H | -1.92975100 | -1.07550100 | -0.91426800 |
| H | -1.92917600 | -1.07568400 | 0.91481100  |
| O | 2.11580100  | 0.20457600  | -0.00017700 |

### Entry 116

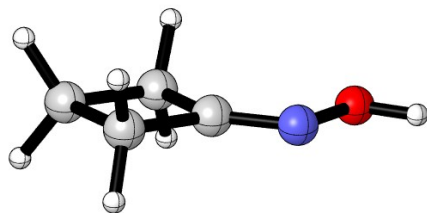

|   |            |            |            |
|---|------------|------------|------------|
| C | -0.7558658 | -1.1154695 | 0.0001518  |
| C | -1.5196428 | 0.2517395  | -0.0002892 |
| C | -0.1577998 | 1.0187555  | 0.0001668  |
| C | 0.5385812  | -0.3269295 | 0.0001458  |
| N | 1.7358902  | -0.7346435 | -0.0000322 |
| O | 2.6399252  | 0.3585835  | -0.0000832 |
| H | -0.9064058 | -1.7355525 | 0.8869368  |
| H | -0.9061908 | -1.7361635 | -0.8862352 |



|   |            |            |            |
|---|------------|------------|------------|
| H | -2.1317378 | 0.4227095  | 0.8853888  |
| H | -2.1308798 | 0.4224835  | -0.8866062 |
| H | 0.0480252  | 1.6265875  | 0.8847318  |
| H | 0.0485312  | 1.6269905  | -0.8839982 |
| H | 3.4975702  | -0.0790905 | -0.0002772 |

### 116-radical

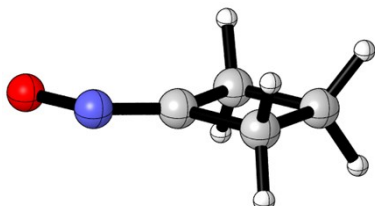

|   |            |            |            |
|---|------------|------------|------------|
| C | 0.3551794  | -1.1390448 | 0.0000234  |
| C | 1.2626994  | 0.1381852  | -0.0005936 |
| C | -0.0008546 | 1.0590872  | 0.0003374  |
| C | -0.8379846 | -0.2101088 | 0.0002184  |
| N | -2.0877586 | -0.4358608 | 0.0001594  |
| O | -3.0949186 | 0.2792712  | 0.0002634  |
| H | 0.4443494  | -1.7709338 | -0.8870676 |
| H | 0.4449574  | -1.7703668 | 0.8874684  |
| H | 1.8871884  | 0.2404482  | -0.8876506 |
| H | 1.8886094  | 0.2404242  | 0.8854564  |
| H | -0.1311496 | 1.6848602  | -0.8865416 |
| H | -0.1303176 | 1.6840392  | 0.8879264  |

### Entry 117

|   |             |             |             |
|---|-------------|-------------|-------------|
| C | -0.11271500 | 1.12554100  | -0.01806100 |
| C | -1.63810200 | 0.99703000  | 0.17841000  |
| C | -1.96780700 | -0.42739300 | -0.31150600 |
| C | -0.76709200 | -1.26606700 | 0.16834400  |
| C | 0.39411400  | -0.29892500 | 0.06471900  |
| N | 1.59716300  | -0.70768800 | 0.02412200  |
| O | 2.50207600  | 0.38129200  | -0.07873600 |
| H | 0.13820600  | 1.53122300  | -1.00493900 |
| H | 0.38058200  | 1.77062900  | 0.71243600  |
| H | -1.88461400 | 1.08666600  | 1.24171600  |
| H | -2.19920300 | 1.77007700  | -0.35055200 |
| H | -2.92300300 | -0.79931300 | 0.06495100  |
| H | -2.01643100 | -0.44265300 | -1.40571100 |
| H | -0.90354800 | -1.55320400 | 1.21835100  |
| H | -0.59617500 | -2.18055700 | -0.40107200 |
| H | 3.35705300  | -0.06050300 | -0.10558300 |

### 117-radical

|   |             |            |            |
|---|-------------|------------|------------|
| C | -0.16378500 | 1.17407800 | 0.05437400 |
|---|-------------|------------|------------|

|   |             |             |             |
|---|-------------|-------------|-------------|
| C | -1.66726500 | 0.92876200  | -0.18930600 |
| C | -1.90333700 | -0.51863200 | 0.28874100  |
| C | -0.63621200 | -1.27371700 | -0.16239900 |
| C | 0.43948900  | -0.21585200 | -0.05128500 |
| N | 1.68855100  | -0.47230600 | -0.02169000 |
| O | 2.69859200  | 0.23598200  | 0.06832900  |
| H | 0.29206100  | 1.86875000  | -0.65620000 |
| H | 0.02192400  | 1.57616700  | 1.05776100  |
| H | -2.30030000 | 1.65443600  | 0.32508800  |
| H | -1.88561500 | 1.00423300  | -1.25947100 |
| H | -1.97719400 | -0.54071100 | 1.38109500  |
| H | -2.82038900 | -0.95484200 | -0.11185800 |
| H | -0.41431200 | -2.16070500 | 0.43379700  |
| H | -0.73810800 | -1.59687600 | -1.20576800 |

### Entry 118

|   |             |             |             |
|---|-------------|-------------|-------------|
| C | 1.08272500  | 1.42418600  | -0.25622800 |
| C | -0.21142400 | 1.09295600  | 0.51685100  |
| C | 0.39405600  | -1.39589100 | 0.38633800  |
| C | 1.67234600  | -1.03711500 | -0.39574400 |
| C | 2.17365500  | 0.36789400  | -0.03529100 |
| C | -0.65388900 | -0.32108100 | 0.23538000  |
| N | -1.81459600 | -0.69871000 | -0.13951200 |
| O | -2.73250800 | 0.37652500  | -0.25150000 |
| H | 0.85022100  | 1.48668500  | -1.32583000 |
| H | 1.44087600  | 2.41342600  | 0.04477800  |
| H | -0.01588400 | 1.17528400  | 1.59466100  |
| H | -1.00602400 | 1.79714000  | 0.27632900  |
| H | 0.64447900  | -1.48605100 | 1.45242200  |
| H | -0.01899500 | -2.35381300 | 0.06506800  |
| H | 2.44664500  | -1.78416500 | -0.19550300 |
| H | 1.45927500  | -1.08353700 | -1.47048300 |
| H | 2.48811700  | 0.38301400  | 1.01669200  |
| H | 3.06003200  | 0.61531400  | -0.62816700 |
| H | -3.53131700 | -0.07022600 | -0.54922000 |

### 118-radical

|   |             |             |             |
|---|-------------|-------------|-------------|
| C | 1.13456300  | 1.39527400  | -0.27215600 |
| C | -0.18352300 | 1.15609700  | 0.49083700  |
| C | 0.26954700  | -1.38584000 | 0.38791400  |
| C | 1.57405400  | -1.10336000 | -0.38280300 |
| C | 2.15199500  | 0.27286000  | -0.02226000 |
| C | -0.69861700 | -0.24286800 | 0.23699500  |
| N | -1.90674800 | -0.47394300 | -0.11894700 |
| O | -2.89543500 | 0.23804700  | -0.32144800 |
| H | 0.91926200  | 1.45766800  | -1.34512700 |

|   |             |             |             |
|---|-------------|-------------|-------------|
| H | 1.55279600  | 2.36266200  | 0.02252000  |
| H | -0.00190300 | 1.26701500  | 1.56881400  |
| H | -0.94331200 | 1.88884400  | 0.21270500  |
| H | 0.50881800  | -1.50620100 | 1.45376700  |
| H | -0.19663600 | -2.31517300 | 0.05479300  |
| H | 2.30306500  | -1.89108800 | -0.17007300 |
| H | 1.37046800  | -1.14175800 | -1.45949900 |
| H | 2.44785200  | 0.27754900  | 1.03515600  |
| H | 3.06219200  | 0.46073600  | -0.59999600 |

### Entry 119

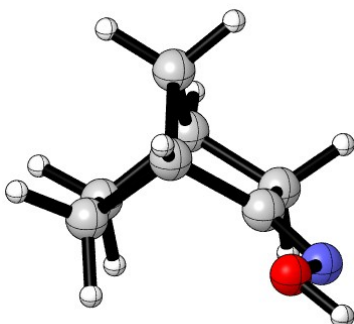

|   |            |            |            |
|---|------------|------------|------------|
| C | -0.4067130 | -1.4002852 | -0.5001538 |
| C | 0.3983790  | -0.6890772 | 0.6270453  |
| C | -1.2286000 | 0.8161968  | 0.1108133  |
| C | -1.5128190 | -0.3555202 | -0.8616358 |
| C | -0.7315240 | 0.0667958  | 1.3675183  |
| C | 0.0672940  | 1.5312898  | -0.3420457 |
| C | 1.1152130  | 0.4669938  | -0.0389987 |
| N | 2.3376370  | 0.6122948  | -0.3503917 |
| O | 3.1125920  | -0.5194212 | 0.0265133  |
| H | 0.2249740  | -1.6670352 | -1.3488188 |
| H | -0.8438840 | -2.3234892 | -0.1107957 |
| H | 1.0430860  | -1.3429492 | 1.2082062  |
| H | -2.0728770 | 1.4911308  | 0.2541773  |
| H | -1.4637360 | -0.0388642 | -1.9064548 |
| H | -2.5120570 | -0.7648962 | -0.6933377 |
| H | -0.3646900 | 0.7334328  | 2.1524453  |
| H | -1.4775840 | -0.6083022 | 1.7954192  |
| H | 0.2519670  | 2.4299058  | 0.2555583  |
| H | 0.0654130  | 1.8242628  | -1.3943998 |
| H | 3.9979290  | -0.2624632 | -0.2506637 |

### 119-radical

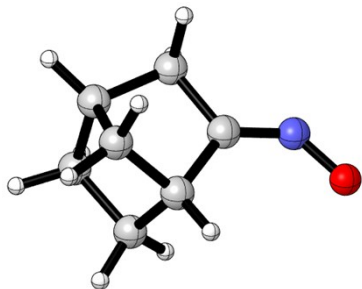

|   |            |            |            |
|---|------------|------------|------------|
| C | -0.3177803 | -1.4363907 | -0.4447607 |
| C | 0.5158287  | -0.7406267 | 0.6671893  |
| C | -0.9580353 | 0.8735843  | 0.0413013  |
| C | -1.3128013 | -0.3140257 | -0.8891107 |
| C | -0.5604213 | 0.1413233  | 1.3439423  |
| C | 0.4021317  | 1.4674273  | -0.4047667 |
| C | 1.3412717  | 0.3347893  | -0.0217657 |
| N | 2.5895837  | 0.3047623  | -0.2688067 |
| O | 3.4961307  | -0.5086527 | -0.0489267 |
| H | 0.3079057  | -1.8017317 | -1.2607127 |
| H | -0.8480923 | -2.2958767 | -0.0255657 |
| H | 1.0973927  | -1.4119877 | 1.2969733  |
| H | -1.7481573 | 1.6191673  | 0.1308823  |
| H | -1.2025063 | -0.0520247 | -1.9441037 |
| H | -2.3493543 | -0.6252987 | -0.7391207 |
| H | -0.1560513 | 0.8064583  | 2.1109123  |
| H | -1.3745303 | -0.4475947 | 1.7745733  |
| H | 0.6370587  | 2.3805593  | 0.1525563  |
| H | 0.4404257  | 1.7061393  | -1.4706897 |

### Entry 120

|   |             |             |             |
|---|-------------|-------------|-------------|
| C | 0.62157800  | 0.44451400  | 0.00002700  |
| C | -0.82574300 | 0.00484600  | -0.00001000 |
| N | 1.58183000  | -0.38493600 | 0.00001200  |
| C | -1.49763900 | 0.59621800  | -1.26013900 |
| C | -1.49759400 | 0.59596600  | 1.26028000  |
| C | -0.96245100 | -1.52462300 | -0.00015000 |
| O | 2.83050600  | 0.27490100  | -0.00000300 |
| H | 0.82744100  | 1.51902100  | 0.00001800  |
| H | -2.56448900 | 0.35452600  | -1.26735500 |
| H | -1.40078600 | 1.68579500  | -1.29060800 |
| H | -1.04975100 | 0.19049100  | -2.17110000 |
| H | -1.40073000 | 1.68553400  | 1.29096600  |
| H | -2.56444200 | 0.35427100  | 1.26747000  |
| H | -1.04966600 | 0.19003700  | 2.17112900  |
| H | -0.49067700 | -1.96441000 | -0.88126900 |
| H | -0.49063400 | -1.96457400 | 0.88086100  |
| H | -2.02071300 | -1.80178900 | -0.00015400 |

|   |            |             |             |
|---|------------|-------------|-------------|
| H | 3.45868500 | -0.45509100 | -0.00006100 |
|---|------------|-------------|-------------|

**120-radical**

|   |             |             |             |
|---|-------------|-------------|-------------|
| C | -0.62591800 | -0.58768200 | -0.00000600 |
| C | 0.76854300  | -0.00037700 | 0.00000000  |
| O | -2.88955400 | -0.10088600 | 0.00000000  |
| N | -1.68234300 | 0.13121200  | -0.00000100 |
| C | 1.50576600  | -0.50766800 | -1.25997200 |
| C | 1.50575200  | -0.50765700 | 1.25998400  |
| C | 0.72814100  | 1.53548400  | -0.00000700 |
| H | -0.74771500 | -1.67306300 | -0.00000800 |
| H | 2.53817700  | -0.14595500 | -1.26605400 |
| H | 1.53485900  | -1.60098700 | -1.29149000 |
| H | 1.01500600  | -0.15534200 | -2.17095400 |
| H | 1.53484400  | -1.60097600 | 1.29151300  |
| H | 2.53816400  | -0.14594500 | 1.26607400  |
| H | 1.01498300  | -0.15532300 | 2.17095700  |
| H | 0.21232200  | 1.91980900  | -0.88337000 |
| H | 0.21231200  | 1.91981700  | 0.88334700  |
| H | 1.74618400  | 1.93396300  | -0.00000300 |

**Entry 121**

|   |             |             |             |
|---|-------------|-------------|-------------|
| C | 0.42471700  | 1.01773000  | -0.00000800 |
| N | 1.69210100  | 0.88356600  | -0.00000800 |
| C | -0.69557500 | -0.01622000 | 0.00000000  |
| C | -0.61459700 | -0.89658000 | -1.26756700 |
| C | -2.03516800 | 0.74625800  | -0.00000800 |
| C | -0.61459400 | -0.89655300 | 1.26758600  |
| O | 2.11470900  | -0.46372000 | 0.00000100  |
| H | 0.13811500  | 2.06858100  | -0.00001200 |
| H | -1.45153800 | -1.60179600 | -1.27696300 |
| H | -0.67914600 | -0.28668000 | -2.17317800 |
| H | 0.31637800  | -1.46134500 | -1.30028800 |
| H | -2.13101800 | 1.38206400  | 0.88559700  |
| H | -2.13101700 | 1.38204500  | -0.88562700 |
| H | -2.87246100 | 0.04342500  | -0.00000100 |
| H | -1.45153000 | -1.60177400 | 1.27699700  |
| H | 0.31638600  | -1.46131100 | 1.30031900  |
| H | -0.67914600 | -0.28663300 | 2.17318400  |
| H | 3.07389500  | -0.37959300 | -0.00000200 |

**121-radical**

|   |             |             |             |
|---|-------------|-------------|-------------|
| C | -0.45949300 | 1.00556600  | -0.00004900 |
| O | -2.32824200 | -0.35832600 | 0.00000800  |
| N | -1.70295100 | 0.70092500  | -0.00003000 |
| C | 0.67820300  | -0.01568000 | -0.00000100 |

|   |             |             |             |
|---|-------------|-------------|-------------|
| C | 2.00657700  | 0.76133500  | 0.00004700  |
| C | 0.58394300  | -0.89608000 | -1.26345600 |
| C | 0.58384200  | -0.89606500 | 1.26345800  |
| H | -0.25066000 | 2.06938100  | -0.00003700 |
| H | 2.85082400  | 0.06694400  | 0.00008600  |
| H | 2.09457000  | 1.39695000  | -0.88607500 |
| H | 2.09449900  | 1.39696400  | 0.88616600  |
| H | -0.36512600 | -1.43533000 | -1.30331600 |
| H | 0.67302700  | -0.29290000 | -2.17086500 |
| H | 1.39175400  | -1.63408100 | -1.26464000 |
| H | 1.39165000  | -1.63406800 | 1.26471400  |
| H | 0.67285600  | -0.29287400 | 2.17086600  |
| H | -0.36523200 | -1.43531100 | 1.30324700  |

### Entry 122

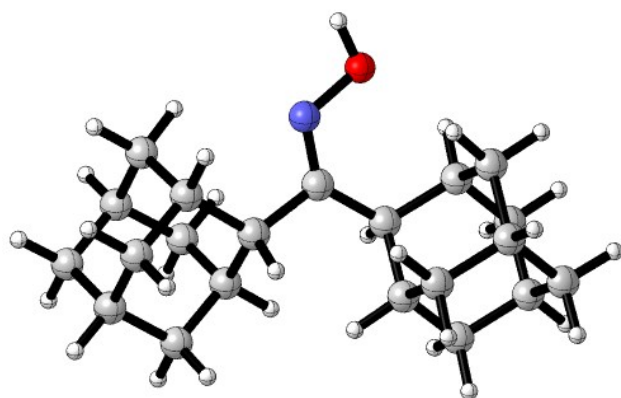

|   |            |            |            |
|---|------------|------------|------------|
| C | -0.0003522 | 1.0359034  | 0.0213254  |
| N | -0.2424062 | 2.2779424  | 0.2056934  |
| C | -1.1727222 | 0.1302264  | 0.4266414  |
| C | -1.7105172 | -0.7798346 | -0.7222346 |
| C | -2.3895742 | 0.8334184  | 1.0889634  |
| C | -2.5378332 | 0.0384264  | -1.7339216 |
| C | -2.6036452 | -1.8704776 | -0.0925976 |
| C | -3.2410942 | 1.6225544  | 0.0713404  |
| C | -3.2769792 | -0.2612986 | 1.7224674  |
| C | -3.7516892 | 0.6758204  | -1.0295656 |
| C | -3.7977432 | -1.2180576 | 0.6300914  |
| C | -4.6287322 | -0.4239616 | -0.3972656 |
| C | 1.2416798  | 0.3483574  | -0.5783246 |
| C | 1.5767788  | -1.0124136 | 0.1166384  |
| C | 2.5717448  | 1.1567804  | -0.6691846 |
| C | 2.1648718  | -0.7674686 | 1.5216324  |
| C | 2.6003658  | -1.7898736 | -0.7358386 |
| C | 3.1652308  | 1.3894394  | 0.7353164  |
| C | 3.5887498  | 0.3629634  | -1.5178406 |

|   |            |            |            |
|---|------------|------------|------------|
| C | 3.4731668  | 0.0373704  | 1.4069574  |
| C | 3.9069308  | -0.9879746 | -0.8555656 |
| C | 4.4890678  | -0.7474566 | 0.5520924  |
| O | 0.7782168  | 3.1866404  | -0.1519986 |
| H | -0.7615462 | -0.5414466 | 1.1901074  |
| H | -0.8790432 | -1.2600066 | -1.2448006 |
| H | -2.0294782 | 1.5127374  | 1.8651124  |
| H | -2.8713452 | -0.6194856 | -2.5452786 |
| H | -1.9196822 | 0.8193754  | -2.1904506 |
| H | -2.0184772 | -2.4759486 | 0.6100684  |
| H | -2.9634792 | -2.5508216 | -0.8735366 |
| H | -2.6537282 | 2.4323634  | -0.3633406 |
| H | -4.0893772 | 2.0811014  | 0.5941164  |
| H | -2.7110112 | -0.8223976 | 2.4758384  |
| H | -4.1217192 | 0.2044844  | 2.2432804  |
| H | -4.3412692 | 1.2421694  | -1.7590446 |
| H | -4.4197342 | -1.9959826 | 1.0867134  |
| H | -5.5000902 | 0.0283274  | 0.0908134  |
| H | -5.0120922 | -1.0983146 | -1.1725826 |
| H | 0.9412818  | 0.1133944  | -1.6105086 |
| H | 0.6796818  | -1.6257316 | 0.2038084  |
| H | 2.3876678  | 2.1122724  | -1.1511626 |
| H | 2.3518998  | -1.7301726 | 2.0119584  |
| H | 1.4485768  | -0.2254216 | 2.1497664  |
| H | 2.1858858  | -1.9883746 | -1.7316566 |
| H | 2.7929168  | -2.7645326 | -0.2720516 |
| H | 2.4687878  | 1.9708134  | 1.3454394  |
| H | 4.0822478  | 1.9841014  | 0.6475964  |
| H | 3.1954438  | 0.2048204  | -2.5294066 |
| H | 4.5042958  | 0.9566054  | -1.6248766 |
| H | 3.8877578  | 0.2073714  | 2.4067504  |
| H | 4.6288788  | -1.5430616 | -1.4648136 |
| H | 5.4295028  | -0.1885606 | 0.4799644  |
| H | 4.7248698  | -1.7059596 | 1.0302414  |
| H | 0.3788638  | 4.0292544  | 0.0871154  |

**122-radical**

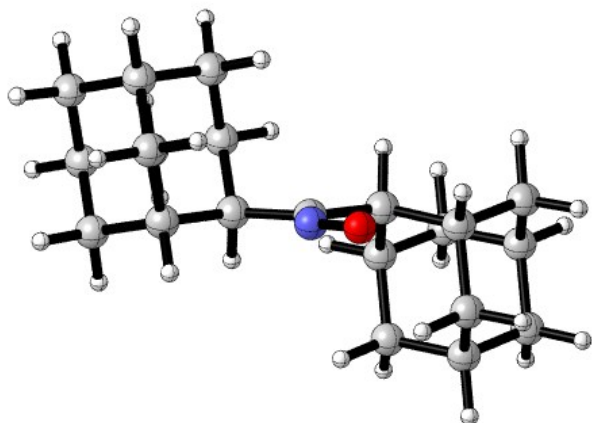

|   |            |            |            |
|---|------------|------------|------------|
| C | -0.0036864 | 0.9447027  | 0.0496276  |
| O | 0.5654066  | 3.2185847  | -0.0956094 |
| N | -0.1148704 | 2.2173487  | 0.1495826  |
| C | -1.1976694 | 0.1064517  | 0.4888816  |
| C | -1.7462244 | -0.8264433 | -0.6339794 |
| C | -2.3904304 | 0.9064257  | 1.0792176  |
| C | -2.4701144 | -0.0020923 | -1.7177254 |
| C | -2.7346984 | -1.8263593 | 0.0001066  |
| C | -3.1394274 | 1.7071937  | -0.0085844 |
| C | -3.3750764 | -0.0999873 | 1.7137746  |
| C | -3.6639514 | 0.7492097  | -1.0942244 |
| C | -3.9130694 | -1.0647163 | 0.6366386  |
| C | -4.6410444 | -0.2606383 | -0.4592544 |
| C | 1.2313876  | 0.2551877  | -0.5475404 |
| C | 1.6784866  | -1.0066853 | 0.2513056  |
| C | 2.4753376  | 1.1583817  | -0.7558714 |
| C | 2.3049006  | -0.6005653 | 1.5999856  |
| C | 2.7198986  | -1.7776063 | -0.5877394 |
| C | 3.1114586  | 1.5476797  | 0.5957846  |
| C | 3.5130006  | 0.3789797  | -1.5927674 |
| C | 3.5460996  | 0.2805157  | 1.3547166  |
| C | 3.9535646  | -0.8913193 | -0.8399324 |
| C | 4.5784596  | -0.4975063 | 0.5136786  |
| H | -0.8271954 | -0.5477603 | 1.2895246  |
| H | -0.9221214 | -1.3832533 | -1.0894594 |
| H | -2.0181244 | 1.5907427  | 1.8477216  |
| H | -2.8165774 | -0.6706263 | -2.5145784 |
| H | -1.7798514 | 0.7119007  | -2.1809964 |
| H | -2.2220934 | -2.4338453 | 0.7554536  |
| H | -3.1034854 | -2.5175893 | -0.7667354 |
| H | -2.4886374 | 2.4636877  | -0.4523354 |
| H | -3.9756794 | 2.2439997  | 0.4547546  |
| H | -2.8786344 | -0.6652363 | 2.5114386  |
| H | -4.2060834 | 0.4423637  | 2.1789306  |



|   |            |            |            |
|---|------------|------------|------------|
| H | -4.1807924 | 1.3231097  | -1.8709684 |
| H | -4.6070874 | -1.7775443 | 1.0952236  |
| H | -5.4997314 | 0.2694667  | -0.0309624 |
| H | -5.0361324 | -0.9395373 | -1.2244544 |
| H | 0.9102046  | -0.0913363 | -1.5410284 |
| H | 0.8201016  | -1.6598433 | 0.4271826  |
| H | 2.1869046  | 2.0620107  | -1.2968184 |
| H | 2.5808146  | -1.5014533 | 2.1603376  |
| H | 1.5763056  | -0.0564753 | 2.2119656  |
| H | 2.2772396  | -2.0927493 | -1.5401044 |
| H | 3.0125836  | -2.6905253 | -0.0559074 |
| H | 2.4111546  | 2.1320057  | 1.1978986  |
| H | 3.9777166  | 2.1935197  | 0.4118556  |
| H | 3.0891436  | 0.1127597  | -2.5683854 |
| H | 4.3790106  | 1.0214937  | -1.7875234 |
| H | 3.9908806  | 0.5609407  | 2.3156026  |
| H | 4.6863256  | -1.4414763 | -1.4402944 |
| H | 5.4697306  | 0.1197717  | 0.3514306  |
| H | 4.9063746  | -1.3952633 | 1.0511586  |

#### Entry 123

|    |             |             |             |
|----|-------------|-------------|-------------|
| C  | 0.03890000  | 0.42034700  | -0.00016600 |
| N  | 0.94471800  | -0.46019700 | -0.00013500 |
| H  | 0.20824100  | 1.49283100  | 0.00006000  |
| O  | 2.21453200  | 0.13426800  | 0.00009600  |
| H  | 2.80638600  | -0.62642000 | 0.00022900  |
| Cl | -1.62219500 | -0.07301500 | 0.00005200  |

#### 123-radical

|    |             |             |             |
|----|-------------|-------------|-------------|
| C  | -0.06511400 | 0.51801600  | -0.00008600 |
| N  | -1.06582700 | -0.26375500 | -0.00004700 |
| H  | -0.15687200 | 1.59820700  | 0.00002200  |
| O  | -2.28119200 | -0.09484400 | 0.00004100  |
| Cl | 1.54458100  | -0.12360400 | 0.00002900  |

#### Entry 124

|   |             |             |             |
|---|-------------|-------------|-------------|
| C | -0.49217000 | 0.34946000  | -0.00064900 |
| N | 0.45582700  | -0.47762000 | -0.00049800 |
| H | -0.42505500 | 1.43293000  | 0.00014600  |
| F | -1.74156400 | -0.12371700 | 0.00042400  |
| O | 1.69232400  | 0.18391300  | 0.00031300  |
| H | 2.32277200  | -0.54420100 | 0.00092200  |

#### 124-radical

|   |             |             |             |
|---|-------------|-------------|-------------|
| C | 0.47523400  | 0.41317300  | 0.00047900  |
| O | -1.78060800 | -0.00641500 | -0.00033300 |

|   |             |             |             |
|---|-------------|-------------|-------------|
| N | -0.57835700 | -0.28433700 | 0.00041300  |
| H | 0.52358900  | 1.49529600  | -0.00061300 |
| F | 1.65759700  | -0.21474000 | -0.00027600 |

#### Entry 125

|    |             |             |             |
|----|-------------|-------------|-------------|
| C  | -0.64639800 | 0.45516100  | -0.00001700 |
| N  | -1.52771600 | -0.44841600 | 0.00002600  |
| H  | -0.84240900 | 1.52340100  | -0.00002100 |
| Br | 1.18083700  | -0.03766200 | -0.00001700 |
| O  | -2.81619300 | 0.10901100  | 0.00005600  |
| H  | -3.38493000 | -0.66936800 | 0.00010200  |

#### 125-radical

|    |             |             |             |
|----|-------------|-------------|-------------|
| C  | -0.66590800 | 0.57075200  | -0.00002900 |
| N  | -1.63549700 | -0.24702700 | -0.00001600 |
| H  | -0.79807200 | 1.64726000  | 0.00001500  |
| O  | -2.85676500 | -0.14157500 | 0.00002000  |
| Br | 1.11703200  | -0.06314200 | 0.00000300  |

#### Entry 126

|   |             |             |             |
|---|-------------|-------------|-------------|
| C | -0.12335900 | 0.66630100  | -0.00002800 |
| N | -0.80617000 | -0.40654300 | 0.00002300  |
| O | 1.21616900  | 0.67045100  | -0.00004700 |
| C | 1.86867500  | -0.60802800 | -0.00002200 |
| H | -0.55233600 | 1.66499100  | -0.00003800 |
| H | 2.93443600  | -0.39006800 | -0.00004500 |
| H | 1.59177500  | -1.17812800 | 0.88946000  |
| H | 1.59174600  | -1.17817800 | -0.88946200 |
| O | -2.19090700 | -0.10150100 | 0.00006100  |
| H | -2.59642800 | -0.97405400 | 0.00010900  |

#### 126-radical

|   |             |             |             |
|---|-------------|-------------|-------------|
| C | 0.15250300  | 0.75905900  | -0.00000500 |
| N | 0.93645000  | -0.24736500 | -0.00002800 |
| O | 2.18108600  | -0.33615100 | 0.00001700  |
| O | -1.18794300 | 0.64813600  | 0.00000600  |
| C | -1.72137700 | -0.68130600 | 0.00000400  |
| H | 0.51004700  | 1.78325000  | 0.00000800  |
| H | -2.80272500 | -0.56522900 | 0.00010400  |
| H | -1.39725900 | -1.22439800 | -0.89189100 |
| H | -1.39710700 | -1.22447200 | 0.89179700  |

#### Entry 127

|   |            |             |             |
|---|------------|-------------|-------------|
| C | 1.02635100 | -0.55837300 | 0.00086000  |
| N | 2.02698000 | 0.21886300  | -0.00033600 |
| H | 1.11698900 | -1.64298600 | 0.00252900  |

|    |             |             |             |
|----|-------------|-------------|-------------|
| C  | -0.37294800 | -0.01789400 | 0.00005700  |
| Cl | -0.45026000 | 1.75991700  | -0.00277700 |
| Cl | -1.21257000 | -0.66326200 | 1.47107800  |
| Cl | -1.21254800 | -0.66796100 | -1.46898800 |
| O  | 3.22048900  | -0.49024500 | 0.00078800  |
| H  | 3.89124500  | 0.20272200  | -0.00029300 |

### 127-radical

|    |             |             |             |
|----|-------------|-------------|-------------|
| C  | 0.97307200  | -0.00010200 | 0.75873900  |
| N  | 2.08016600  | 0.00002000  | 0.12027200  |
| H  | 0.95170600  | -0.00046200 | 1.84495900  |
| C  | -0.33350500 | 0.00003000  | 0.03646800  |
| Cl | -0.12727500 | 0.00066100  | -1.73639600 |
| Cl | -1.27026300 | 1.46757600  | 0.54265900  |
| Cl | -1.27004500 | -1.46812000 | 0.54160100  |
| O  | 3.24982900  | -0.00015600 | 0.45352400  |

### Entry 128

|   |             |             |             |
|---|-------------|-------------|-------------|
| C | -0.83785700 | 0.14106400  | 0.11233200  |
| N | -1.90227100 | -0.53256100 | -0.06049400 |
| N | 0.36043200  | -0.56075700 | 0.21365100  |
| H | 0.39287800  | -1.55998100 | 0.05264200  |
| H | -0.78024600 | 1.21854200  | 0.22142700  |
| O | -3.02347300 | 0.30427200  | -0.06463500 |
| H | -3.75304400 | -0.30693800 | -0.21483800 |
| N | 1.58281500  | 0.05771300  | -0.00956600 |
| O | 2.53340900  | -0.69965700 | -0.12553500 |
| O | 1.60015500  | 1.27678800  | -0.02712400 |

### 128-radical

|   |             |             |             |
|---|-------------|-------------|-------------|
| C | -0.87676600 | 0.24797500  | 0.28661300  |
| N | -1.94824600 | -0.31058500 | -0.13177200 |
| N | 0.28895300  | -0.52195500 | 0.37936000  |
| H | 0.25226500  | -1.51356900 | 0.17390700  |
| H | -0.83012800 | 1.28046300  | 0.60992200  |
| O | -3.11766500 | 0.06380200  | -0.19816400 |
| N | 1.51030700  | 0.03259900  | -0.02792700 |
| O | 2.41137900  | -0.76788700 | -0.20630500 |
| O | 1.56645600  | 1.24718900  | -0.10067200 |

### Entry 129

|   |             |             |             |
|---|-------------|-------------|-------------|
| C | -0.38693100 | -0.43309800 | -0.12040000 |
| N | -1.34345100 | 0.39432800  | 0.08535400  |
| N | 0.92264000  | -0.03633400 | -0.23030800 |
| H | -0.57739700 | -1.49777500 | -0.25577100 |
| O | -2.58962700 | -0.29678600 | 0.01609200  |

|   |             |             |             |
|---|-------------|-------------|-------------|
| H | -3.22180000 | 0.39906300  | 0.21964200  |
| C | 1.95230000  | -1.00231200 | 0.12384800  |
| H | 1.64510200  | -2.00120100 | -0.19140200 |
| H | 2.88098000  | -0.75173500 | -0.39412500 |
| H | 2.15402800  | -1.02716000 | 1.20516400  |
| C | 1.23850500  | 1.36327100  | 0.01249800  |
| H | 0.52192500  | 1.99181800  | -0.51556900 |
| H | 1.19185600  | 1.61984500  | 1.08046700  |
| H | 2.24476000  | 1.56831500  | -0.35814700 |

### 129-radical

|   |             |             |             |
|---|-------------|-------------|-------------|
| C | -0.45078300 | -0.46754500 | -0.00010600 |
| N | -1.48214600 | 0.37570100  | 0.00007600  |
| N | 0.82124300  | -0.04158400 | -0.00028800 |
| H | -0.62573400 | -1.54296400 | -0.00021000 |
| O | -2.62076200 | -0.23609600 | 0.00005400  |
| C | 1.92971800  | -0.98300600 | 0.00012800  |
| H | 1.55061900  | -2.00410000 | -0.00059200 |
| H | 2.55369000  | -0.83682100 | -0.88752300 |
| H | 2.55245900  | -0.83760900 | 0.88879000  |
| C | 1.15837200  | 1.37927400  | 0.00002100  |
| H | 0.23996300  | 1.96009600  | -0.00109800 |
| H | 1.74772100  | 1.61962800  | 0.89019000  |
| H | 1.74985900  | 1.61938900  | -0.88877600 |

### Entry 130

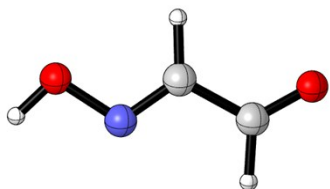

|   |            |            |            |
|---|------------|------------|------------|
| C | 0.1637633  | 0.3633664  | 0.0001581  |
| N | -0.8849368 | -0.3663696 | -0.0003139 |
| H | 0.1350413  | 1.4523714  | 0.0005221  |
| C | 1.4619573  | -0.3410496 | 0.0002011  |
| H | 1.3916663  | -1.4449026 | -0.0001899 |
| O | -2.0440728 | 0.3793504  | -0.0003129 |
| H | -2.7463967 | -0.2826936 | -0.0006889 |
| O | 2.5229783  | 0.2399274  | 0.0006241  |

### 130-radical

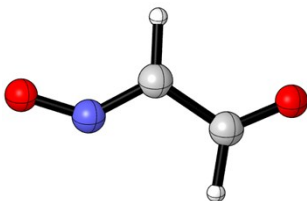

|   |            |            |            |
|---|------------|------------|------------|
| C | -0.1690043 | 0.4072546  | -0.0000351 |
| N | -1.3119893 | -0.1980274 | 0.0000459  |
| H | -0.1209313 | 1.4941596  | -0.0001291 |
| C | 1.0440657  | -0.4144844 | 0.0000079  |
| H | 0.8659367  | -1.5076964 | 0.0001179  |
| O | -2.4662593 | 0.1608416  | 0.0000439  |
| O | 2.1581817  | 0.0579526  | -0.0000511 |

### Entry 131

|   |             |             |             |
|---|-------------|-------------|-------------|
| C | 0.04210200  | 0.22496800  | -0.00001000 |
| N | 1.10376300  | -0.48860000 | 0.00016800  |
| H | 0.10528600  | 1.31484300  | -0.00005100 |
| C | -1.25822400 | -0.42134100 | -0.00015100 |
| C | -2.41151900 | 0.25643700  | -0.00035600 |
| H | -1.25042400 | -1.50698300 | -0.00008800 |
| H | -3.36678700 | -0.25370200 | -0.00046700 |
| H | -2.43410600 | 1.34146900  | -0.00042400 |
| O | 2.25206000  | 0.31197300  | 0.00031200  |
| H | 2.96905800  | -0.33159000 | 0.00046400  |

### 131-radical

|   |             |             |             |
|---|-------------|-------------|-------------|
| C | 0.07747000  | 0.32956900  | 0.00002800  |
| O | 2.37774700  | 0.09065800  | -0.00005600 |
| N | 1.21304300  | -0.28221300 | 0.00000500  |
| H | 0.08019800  | 1.41930900  | -0.00002300 |
| C | -1.16491800 | -0.41257300 | 0.00002400  |
| C | -2.37151400 | 0.16697000  | 0.00000900  |
| H | -1.07417000 | -1.49472500 | 0.00005400  |
| H | -3.27835800 | -0.42399600 | 0.00003700  |
| H | -2.48717100 | 1.24583600  | -0.00001000 |

### Entry 133

|   |             |             |             |
|---|-------------|-------------|-------------|
| C | -0.02379500 | 0.44897400  | -0.00005900 |
| N | 0.87459200  | -0.46119400 | -0.00005200 |
| H | 0.21882800  | 1.51055100  | 0.00004600  |
| C | -1.39589200 | 0.05938600  | -0.00000200 |
| N | -2.52251200 | -0.19312600 | 0.00003700  |
| O | 2.13901200  | 0.08757600  | 0.00004200  |
| H | 2.72263900  | -0.68107500 | 0.00008200  |

### 133-radical

|   |             |             |             |
|---|-------------|-------------|-------------|
| C | -0.01242900 | 0.54187000  | 0.00001100  |
| O | -2.20224000 | -0.15072700 | 0.00001500  |
| N | -1.00093000 | -0.29002200 | 0.00000800  |
| H | -0.20254800 | 1.61194400  | 0.00001700  |
| C | 1.32046700  | 0.05638000  | -0.00001100 |
| N | 2.42553600  | -0.28078200 | -0.00002800 |

#### Entry 134

|    |             |             |             |
|----|-------------|-------------|-------------|
| C  | -0.72985600 | 0.67540900  | 0.00010900  |
| N  | -1.43055400 | -0.38901400 | -0.00005600 |
| H  | -1.16539200 | 1.67306400  | 0.00026300  |
| C  | 0.74766800  | 0.61615600  | 0.00005600  |
| O  | 1.43654400  | 1.58600000  | -0.00009700 |
| O  | -2.77679900 | -0.11512700 | -0.00001400 |
| H  | -3.18980700 | -0.98783400 | -0.00016300 |
| Cl | 1.46966200  | -1.02814700 | 0.00001100  |

#### 134-radical

|    |             |             |             |
|----|-------------|-------------|-------------|
| C  | -0.71385600 | 0.82603700  | -0.00000300 |
| N  | -1.52819700 | -0.17410100 | 0.00000000  |
| H  | -1.08725800 | 1.84652900  | -0.00000300 |
| C  | 0.73463300  | 0.61696900  | -0.00000600 |
| O  | 1.53593700  | 1.49507000  | 0.00000400  |
| O  | -2.72748800 | -0.28557200 | 0.00000200  |
| Cl | 1.24661100  | -1.11540200 | 0.00000000  |

#### Entry 135

|   |             |             |             |
|---|-------------|-------------|-------------|
| C | -0.35344800 | -0.50404500 | 0.00001900  |
| N | -1.26210300 | 0.38859300  | 0.00002100  |
| H | -0.56945400 | -1.57007000 | -0.00003800 |
| C | 1.07987700  | -0.12232600 | 0.00013300  |
| O | 1.96121900  | -0.94912800 | -0.00005200 |
| O | 1.30187000  | 1.20523200  | -0.00002600 |
| H | 2.26274500  | 1.32894200  | -0.00011600 |
| O | -2.52607700 | -0.17057500 | -0.00003500 |
| H | -3.11324000 | 0.59497700  | 0.00000400  |

#### 135-radical

|   |             |             |             |
|---|-------------|-------------|-------------|
| C | -0.35684400 | -0.62839200 | 0.00000200  |
| N | -1.36696400 | 0.17013500  | 0.00000100  |
| H | -0.50226300 | -1.70445500 | -0.00000100 |
| C | 1.01957600  | -0.10850500 | 0.00000700  |
| O | -2.56680700 | 0.02353700  | -0.00000200 |
| O | 1.98712700  | -0.83132800 | -0.00000400 |
| O | 1.08811300  | 1.23992500  | -0.00000100 |
| H | 2.02715800  | 1.47781700  | -0.00000600 |

### Entry 136

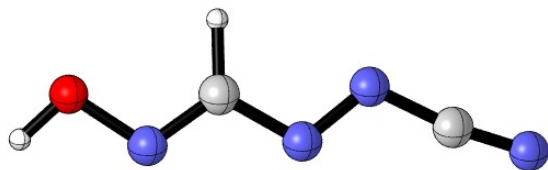

|   |            |            |            |
|---|------------|------------|------------|
| C | -0.5745949 | 0.2418698  | 0.0061673  |
| N | -1.6160629 | -0.5029942 | 0.0966603  |
| H | -0.6012959 | 1.3296528  | -0.0654307 |
| O | -2.7607849 | 0.2440818  | 0.0915693  |
| H | -3.4680369 | -0.4099072 | 0.1630473  |
| N | 0.6351961  | -0.4394162 | 0.0046533  |
| N | 1.6162681  | 0.3539638  | -0.0864727 |
| C | 2.8317571  | -0.2357512 | -0.0951697 |
| N | 3.9375541  | -0.5814992 | -0.1150247 |

### 136-radical

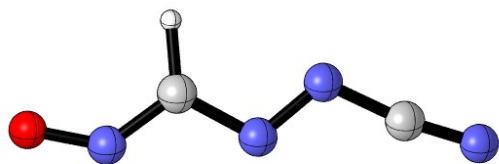

|   |            |            |            |
|---|------------|------------|------------|
| C | -0.9927746 | 0.2326974  | 0.0000323  |
| N | -2.0419136 | -0.5365666 | -0.0001928 |
| H | -1.0839326 | 1.3181764  | 0.0005753  |
| O | -3.2237286 | -0.3089326 | 0.0000713  |
| N | 0.2164884  | -0.4146426 | -0.0005957 |
| N | 1.1920474  | 0.3972414  | -0.0003777 |
| C | 2.4120714  | -0.1763686 | 0.0000533  |
| N | 3.5217424  | -0.5116046 | 0.0004343  |

### Entry 137

|   |             |             |             |
|---|-------------|-------------|-------------|
| C | -0.29689900 | -0.47670500 | -0.00005200 |
| N | -1.22632200 | 0.37944500  | -0.00005100 |
| H | -0.38548100 | -1.55672400 | -0.00000500 |
| N | 1.09091100  | 0.01890600  | 0.00000300  |
| O | 1.93688300  | -0.87015900 | 0.00002100  |
| O | 1.30307000  | 1.21574400  | 0.00001300  |
| O | -2.46618400 | -0.20949600 | 0.00003500  |
| H | -3.07540400 | 0.53979200  | 0.00010100  |

### 137-radical

|   |            |             |            |
|---|------------|-------------|------------|
| C | 0.29584900 | -0.60044000 | 0.00001900 |
| O | 2.51275700 | -0.02415700 | 0.00000900 |

|   |             |             |             |
|---|-------------|-------------|-------------|
| N | 1.31998900  | 0.16351200  | 0.00001400  |
| H | 0.31355700  | -1.68243200 | 0.00002000  |
| N | -1.01504200 | 0.03660800  | 0.00002700  |
| O | -1.95980600 | -0.74456800 | -0.00003000 |
| O | -1.08086200 | 1.25425500  | -0.00003200 |

### Entry 139

|   |             |             |             |
|---|-------------|-------------|-------------|
| C | -0.82721700 | 0.51864800  | -0.07757100 |
| N | -1.73755500 | -0.35568500 | -0.00126300 |
| S | 0.85725200  | -0.07654100 | -0.13552700 |
| O | 0.93795200  | -1.50991500 | -0.08730500 |
| O | 1.57963700  | 0.73585100  | -1.08306300 |
| F | 1.30675200  | 0.46704400  | 1.34517000  |
| O | -2.99477800 | 0.19556700  | -0.00191600 |
| H | -0.95145600 | 1.59690900  | -0.14149100 |
| H | -3.58165500 | -0.56977200 | 0.05593700  |

### 139-radical

|   |             |             |             |
|---|-------------|-------------|-------------|
| C | 0.82057900  | 0.66437200  | -0.04490100 |
| N | 1.82150500  | -0.12939800 | -0.01764200 |
| O | 3.01976100  | 0.00167700  | 0.02160600  |
| S | -0.79702900 | -0.05633600 | -0.14684800 |
| O | -1.64012900 | 0.85196900  | -0.88078100 |
| O | -0.72101600 | -1.47036400 | -0.39487600 |
| F | -1.23131100 | 0.11191100  | 1.42221800  |
| H | 0.89132500  | 1.74747300  | -0.02507500 |

### Entry 140

|    |             |             |             |
|----|-------------|-------------|-------------|
| C  | 1.03133600  | 0.02211700  | -0.53085300 |
| N  | 1.94857500  | 0.04245800  | 0.33639700  |
| O  | 3.15272100  | 0.46139700  | -0.17651600 |
| H  | 3.75109400  | 0.42129200  | 0.58089700  |
| S  | -0.58459600 | -0.54750300 | 0.01271500  |
| O  | -1.15401000 | -1.29992600 | -1.08747500 |
| O  | -0.54463400 | -1.04175200 | 1.36845900  |
| Cl | -1.58562400 | 1.33258700  | 0.04652500  |
| H  | 1.09739500  | 0.29711700  | -1.58067500 |

### 140-radical

|    |             |             |             |
|----|-------------|-------------|-------------|
| C  | 1.03925500  | -0.06867700 | -0.67466600 |
| N  | 2.00674200  | 0.17234400  | 0.12040900  |
| O  | 3.16631000  | 0.48642700  | 0.00308300  |
| S  | -0.52069600 | -0.54553800 | 0.04678400  |
| O  | -1.18327600 | -1.40099700 | -0.91542700 |
| O  | -0.33928200 | -0.89729100 | 1.43680100  |
| Cl | -1.54051800 | 1.31945600  | 0.00107100  |



|   |            |             |             |
|---|------------|-------------|-------------|
| H | 1.08721200 | -0.00160200 | -1.75728500 |
|---|------------|-------------|-------------|

### Entry 141

|   |             |             |             |
|---|-------------|-------------|-------------|
| C | 1.41644900  | 0.15025100  | -0.54527300 |
| N | 2.23147400  | -0.23656400 | 0.34253500  |
| S | -0.13118100 | 0.87310000  | 0.03746400  |
| O | -0.03006200 | 1.28387700  | 1.42535000  |
| O | -0.59086400 | 1.75460300  | -1.02697200 |
| C | -1.28453400 | -0.64418700 | 0.00174100  |
| F | -0.92756000 | -1.52100200 | 0.93727200  |
| F | -2.52951800 | -0.23838500 | 0.21872100  |
| F | -1.20701600 | -1.23144900 | -1.19808500 |
| O | 3.39460900  | -0.73545900 | -0.18855900 |
| H | 1.55750300  | 0.12076800  | -1.62335900 |
| H | 3.91695700  | -0.97743800 | 0.58765800  |

### 141-radical

|   |             |             |             |
|---|-------------|-------------|-------------|
| C | 1.41488300  | 0.12441900  | 0.67275800  |
| N | 2.30651500  | -0.33616500 | -0.12025300 |
| O | 3.39528000  | -0.83849100 | 0.00014400  |
| S | -0.04791200 | 0.85023200  | -0.05962800 |
| O | -0.54286800 | 1.83288000  | 0.89151600  |
| O | 0.18743000  | 1.13259100  | -1.46403200 |
| C | -1.27302200 | -0.60644500 | 0.00179100  |
| F | -1.33039000 | -1.08577700 | 1.24841500  |
| F | -2.47154700 | -0.17376700 | -0.36606900 |
| F | -0.87114400 | -1.57536000 | -0.81870800 |
| H | 1.50880800  | 0.13988800  | 1.75474900  |

### Entry 142

|   |             |             |             |
|---|-------------|-------------|-------------|
| C | 0.98154900  | -0.71858600 | 0.00004900  |
| N | 1.71704100  | 0.30655800  | -0.00005800 |
| S | -0.79647600 | -0.46075300 | -0.00000700 |
| O | -1.33211500 | -0.92218900 | -1.26669400 |
| O | -1.33217900 | -0.92222900 | 1.26664000  |
| C | -0.89704500 | 1.31862900  | 0.00001400  |
| N | -1.10270900 | 2.45396400  | 0.00003100  |
| O | 3.05939200  | 0.01105400  | 0.00002500  |
| H | 1.28917200  | -1.76288500 | 0.00018600  |
| H | 3.48631200  | 0.87794500  | -0.00003800 |

### 142-radical

|   |             |             |             |
|---|-------------|-------------|-------------|
| C | -0.97689900 | -0.02763800 | -0.67881000 |
| N | -1.94074700 | 0.23826500  | 0.11887700  |
| O | -3.09559800 | 0.55843100  | 0.00126300  |
| S | 0.57463500  | -0.52028700 | 0.04777200  |

|   |             |             |             |
|---|-------------|-------------|-------------|
| O | 0.38556800  | -0.85733200 | 1.44147400  |
| O | 1.23218200  | -1.38539600 | -0.91030900 |
| C | 1.46293000  | 1.02600600  | 0.01380800  |
| N | 2.04927800  | 2.02033100  | -0.01476500 |
| H | -1.04728300 | -0.00140700 | -1.76254900 |

### Entry 143

|   |             |             |             |
|---|-------------|-------------|-------------|
| C | -0.83578700 | -0.49210600 | -0.14159200 |
| N | -1.76338800 | 0.33734400  | 0.07922900  |
| O | -3.01282100 | -0.23757700 | -0.02046800 |
| H | -3.61424100 | 0.49488700  | 0.16475000  |
| S | 0.84787400  | 0.11971700  | -0.09958400 |
| O | 1.53236800  | -0.42049500 | -1.26606200 |
| O | 0.87840700  | 1.52082300  | 0.23505300  |
| H | -0.95225800 | -1.54456300 | -0.38997300 |
| O | 1.38036900  | -0.73713000 | 1.20103300  |
| H | 2.13236800  | -1.27955200 | 0.91705600  |

### 143-radical

|   |             |             |             |
|---|-------------|-------------|-------------|
| C | 0.83021000  | -0.61463800 | 0.22496800  |
| N | 1.84609200  | 0.10968900  | -0.04363600 |
| O | 3.04418100  | -0.05169600 | -0.03298000 |
| S | -0.78249600 | 0.12725500  | 0.09607300  |
| O | -1.56943900 | -0.31513700 | 1.23636800  |
| O | -0.64698100 | 1.51826200  | -0.26058500 |
| H | 0.89031600  | -1.64726200 | 0.55502000  |
| O | -1.33702900 | -0.69992300 | -1.21155400 |
| H | -2.20013600 | -1.08085200 | -0.98654100 |

### Entry 144

|   |             |             |             |
|---|-------------|-------------|-------------|
| C | 0.87059600  | -0.48069500 | -0.00000800 |
| N | 1.80679500  | 0.38210800  | -0.00003900 |
| P | -0.81166200 | 0.14657800  | 0.00001100  |
| O | -1.06747800 | 1.58167200  | 0.00007400  |
| F | -1.45913200 | -0.66743800 | -1.19781900 |
| F | -1.45915800 | -0.66755600 | 1.19774800  |
| O | 3.05034900  | -0.20229800 | 0.00002300  |
| H | 1.04639400  | -1.55709700 | 0.00001200  |
| H | 3.65903800  | 0.54780100  | 0.00002300  |

### 144-radical

|   |             |             |             |
|---|-------------|-------------|-------------|
| C | -0.85085200 | 0.72284700  | 0.00404800  |
| O | -3.03880800 | -0.00677400 | 0.00024800  |
| N | -1.83750800 | -0.10315400 | -0.00074300 |
| P | 0.82891000  | 0.12040900  | -0.00099700 |
| O | 1.85145500  | 1.16221000  | -0.01053100 |

|   |             |             |             |
|---|-------------|-------------|-------------|
| F | 0.89815400  | -0.90883700 | 1.19757900  |
| F | 0.88541900  | -0.92031000 | -1.19011800 |
| H | -1.01931600 | 1.79769200  | 0.01099500  |

### Entry 145

|   |             |             |             |
|---|-------------|-------------|-------------|
| C | 0.61960900  | 0.60453700  | 0.00005700  |
| N | -0.63404700 | 0.71903300  | -0.00002700 |
| F | 1.25138100  | -0.59811100 | -0.00001500 |
| O | -1.38048900 | -0.44078200 | -0.00003600 |
| H | 1.28380700  | 1.45563000  | 0.00012800  |
| H | -0.78165700 | -1.20682800 | 0.00015000  |

### 145-radical

|   |             |             |             |
|---|-------------|-------------|-------------|
| C | 0.57782600  | 0.56582600  | 0.00004700  |
| N | -0.68506300 | 0.49476000  | 0.00001600  |
| F | 1.34725600  | -0.53672400 | -0.00000500 |
| O | -1.48732200 | -0.44190200 | -0.00005900 |
| H | 1.10174700  | 1.50746000  | 0.00011600  |

### Entry 146

|   |             |             |             |
|---|-------------|-------------|-------------|
| C | -0.65319600 | 0.59522300  | -0.00000100 |
| N | 0.61193700  | 0.75685600  | 0.00000000  |
| O | -1.31508000 | -0.57050500 | 0.00000000  |
| O | 1.24004400  | -0.52346900 | -0.00000200 |
| H | -1.28346200 | 1.47461200  | 0.00000300  |
| H | -0.65799400 | -1.28413200 | 0.00000300  |
| H | 2.17736100  | -0.30802200 | 0.00001100  |

### 146-radical

|   |             |             |             |
|---|-------------|-------------|-------------|
| C | -0.58844800 | 0.60455300  | 0.00000100  |
| N | 0.75650600  | 0.64949300  | -0.00000100 |
| O | -1.25288100 | -0.51859000 | 0.00000100  |
| O | 1.24587300  | -0.54156000 | -0.00000100 |
| H | -1.16231100 | 1.52162400  | 0.00000100  |
| H | -0.54648200 | -1.21419100 | 0.00000100  |

### Entry 147

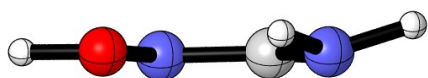

|   |            |            |            |
|---|------------|------------|------------|
| C | 0.3337402  | 0.6883702  | -0.0299969 |
| N | -0.9444738 | 0.7777783  | -0.0540669 |
| N | 1.0780123  | -0.4594648 | -0.0744979 |
| O | -1.5081597 | -0.5346158 | -0.0743899 |

|   |            |            |            |
|---|------------|------------|------------|
| H | 0.8705262  | 1.6304843  | -0.0140159 |
| H | 2.0357022  | -0.4192298 | 0.2310241  |
| H | 0.5877822  | -1.3264947 | 0.0861311  |
| H | -2.4531298 | -0.3568278 | -0.0701879 |

### 147-radical

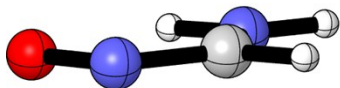

|   |            |            |            |
|---|------------|------------|------------|
| C | 0.0150597  | 0.6329459  | -0.0208284 |
| N | -1.3336493 | 0.6625279  | -0.0743294 |
| N | 0.7197607  | -0.4961671 | 0.0445776  |
| O | -1.8482943 | -0.5145011 | -0.0545354 |
| H | 0.5344067  | 1.5831639  | -0.0327594 |
| H | 1.7242187  | -0.5074541 | 0.0845186  |
| H | 0.1884977  | -1.3605151 | 0.0533566  |

### Entry 148

|    |             |             |             |
|----|-------------|-------------|-------------|
| C  | 0.62011200  | -0.00089000 | 1.25733200  |
| N  | 1.89325300  | -0.00079200 | 1.24909900  |
| C  | -0.33475400 | -0.00000600 | 0.08138700  |
| Cl | -2.01770500 | -0.00050600 | 0.74014500  |
| O  | 2.45524100  | 0.00026300  | -0.01208200 |
| Cl | -0.11424000 | 1.47331100  | -0.93065500 |
| Cl | -0.11389800 | -1.47222700 | -0.93228500 |
| H  | 0.16938200  | -0.00166100 | 2.24244100  |
| H  | 3.40309400  | 0.00064700  | 0.16571500  |

### 148-radical

|    |             |             |             |
|----|-------------|-------------|-------------|
| C  | 0.64708700  | -0.00001000 | 1.24213600  |
| N  | 1.91922400  | -0.00000900 | 1.09141400  |
| C  | -0.32270200 | -0.00000100 | 0.08689300  |
| Cl | -1.98798400 | -0.00004200 | 0.76503100  |
| O  | 2.67077900  | 0.00000000  | 0.13668400  |
| Cl | -0.09459400 | 1.46685800  | -0.94010200 |
| Cl | -0.09454700 | -1.46680700 | -0.94016500 |
| H  | 0.26400400  | -0.00002600 | 2.25146600  |

### Entry 149

|   |             |             |             |
|---|-------------|-------------|-------------|
| C | -0.01231700 | 0.72238300  | 0.00006300  |
| N | -1.29185600 | 0.65210600  | 0.00001600  |
| C | 0.94836700  | -0.37234400 | -0.00001100 |
| O | -1.75566100 | -0.67350300 | -0.00012400 |
| C | 2.26882700  | -0.15776700 | 0.00007700  |
| H | 0.36196100  | 1.74349400  | 0.00017100  |
| H | 0.55030500  | -1.37978200 | -0.00014200 |

|   |             |             |             |
|---|-------------|-------------|-------------|
| H | -2.71204700 | -0.56272100 | -0.00014700 |
| H | 2.97691300  | -0.97769000 | 0.00002200  |
| H | 2.68189000  | 0.84634700  | 0.00020700  |

#### 149-radical

|   |             |             |             |
|---|-------------|-------------|-------------|
| C | -0.05843000 | 0.68181500  | 0.00006900  |
| N | -1.32803100 | 0.45249800  | -0.00000500 |
| C | 0.94501200  | -0.36989300 | 0.00000000  |
| O | -2.00261900 | -0.56964000 | -0.00013700 |
| C | 2.26093300  | -0.12772300 | 0.00007400  |
| H | 0.22489600  | 1.72724100  | 0.00018700  |
| H | 0.57034900  | -1.38912800 | -0.00011800 |
| H | 2.98085100  | -0.93662900 | 0.00001900  |
| H | 2.65598300  | 0.88295700  | 0.00019200  |

#### Entry 150

|   |             |             |             |
|---|-------------|-------------|-------------|
| C | -0.11642100 | 0.04037400  | 0.41016300  |
| N | -1.08581100 | 0.28153400  | -0.37619000 |
| C | 1.24784400  | 0.55998200  | 0.06379000  |
| O | -2.28263800 | -0.28565300 | 0.08357300  |
| O | 2.18880500  | -0.50221300 | -0.10063200 |
| H | -0.24872000 | -0.55864400 | 1.31281400  |
| H | 1.63743600  | 1.16460700  | 0.88636600  |
| H | 1.18149700  | 1.19041300  | -0.82895700 |
| H | -2.92152500 | -0.02930700 | -0.59075200 |
| H | 1.91410900  | -1.03700700 | -0.85339200 |

#### 150-radical

|   |             |             |             |
|---|-------------|-------------|-------------|
| C | -0.15300400 | 0.20019800  | 0.46432500  |
| N | -1.19861400 | 0.04831600  | -0.26161200 |
| C | 1.16231600  | 0.54185100  | -0.16818900 |
| O | -2.36865600 | -0.23276500 | -0.04393100 |
| O | 2.13603800  | -0.48450200 | 0.02482900  |
| H | -0.22811200 | 0.04256100  | 1.53992100  |
| H | 1.58831500  | 1.42806200  | 0.30724000  |
| H | 1.00881500  | 0.76369900  | -1.23017400 |
| H | 1.82635100  | -1.28670200 | -0.40969600 |

#### Entry 151

|   |             |             |             |
|---|-------------|-------------|-------------|
| C | 0.02355100  | 0.92211200  | 0.00004900  |
| N | 1.23566900  | 0.50932100  | 0.00008700  |
| C | -1.14188800 | 0.09300000  | -0.00005100 |
| O | 1.33411200  | -0.86275400 | 0.00002100  |
| N | -2.11254200 | -0.53231600 | -0.00013100 |
| H | -0.11008300 | 1.99730700  | 0.00009800  |
| H | 2.28532100  | -1.02498200 | 0.00005900  |

**151-radical**

|   |             |             |             |
|---|-------------|-------------|-------------|
| C | 0.03386500  | 0.86600100  | 0.00004700  |
| N | 1.21562100  | 0.34120400  | 0.00007700  |
| C | -1.15309600 | 0.08256700  | -0.00005200 |
| O | 1.64471100  | -0.78912400 | 0.00003900  |
| N | -2.13287700 | -0.53025200 | -0.00013200 |
| H | -0.02150900 | 1.94491700  | 0.00010000  |

**Entry 152**

|    |             |             |             |
|----|-------------|-------------|-------------|
| C  | 0.54123400  | -0.91954800 | -0.00022100 |
| N  | 1.83292200  | -0.85774100 | -0.00012900 |
| C  | -0.34799900 | 0.24655100  | -0.00038400 |
| O  | 2.44496000  | 0.33691900  | 0.00033300  |
| O  | 0.00770700  | 1.39455900  | -0.00031500 |
| Cl | -2.08865900 | -0.17383000 | 0.00020000  |
| H  | 0.11852100  | -1.91495700 | -0.00024400 |
| H  | 1.77748100  | 1.06041400  | 0.00124000  |

**152-radical**

|    |             |             |             |
|----|-------------|-------------|-------------|
| C  | -0.56916800 | -0.86808200 | -0.00010000 |
| N  | -1.85217800 | -0.69356500 | -0.00016700 |
| C  | 0.32593400  | 0.29860400  | 0.00006300  |
| O  | -2.56877200 | 0.27446100  | -0.00012500 |
| O  | 0.00973800  | 1.44173600  | 0.00013000  |
| Cl | 2.06439800  | -0.21042600 | 0.00009000  |
| H  | -0.19784200 | -1.88050000 | -0.00017300 |

**Entry 153**

|   |             |             |             |
|---|-------------|-------------|-------------|
| C | 0.01748900  | 0.88673200  | 0.00000200  |
| N | -1.23279000 | 0.63899900  | -0.00000600 |
| S | 1.38360500  | -0.23068300 | 0.00000100  |
| O | -1.50858200 | -0.73972700 | 0.00000500  |
| H | 0.29068500  | 1.93594000  | 0.00000000  |
| H | 0.63646700  | -1.35242900 | -0.00003300 |
| H | -2.47158400 | -0.76814300 | -0.00000100 |

**153-radical**

|   |             |             |             |
|---|-------------|-------------|-------------|
| C | 0.03393900  | 0.84107000  | -0.00004700 |
| N | 1.24610100  | 0.44466300  | -0.00004400 |
| S | -1.39664700 | -0.21208200 | 0.00007900  |
| O | 1.78455000  | -0.66273600 | 0.00009100  |
| H | -0.15282400 | 1.90563000  | -0.00024500 |
| H | -0.70356800 | -1.36949300 | -0.00116000 |

**Entry 154**

|   |             |             |             |
|---|-------------|-------------|-------------|
| C | -0.52270600 | -1.00772800 | -0.37883900 |
| N | -1.71984500 | -0.74461000 | -0.01790200 |
| S | 0.91441800  | 0.11240800  | -0.48334900 |
| O | -2.07392100 | 0.48920700  | 0.42113900  |
| O | 0.35767900  | 1.44509600  | -0.05994200 |
| O | 1.82152000  | -0.56493700 | 0.75213900  |
| H | -0.31980100 | -2.01871100 | -0.71949800 |
| H | -1.30282000 | 1.10178400  | 0.35773600  |
| H | 1.32484900  | -0.57789500 | 1.58701300  |

### 154-radical

|   |             |             |             |
|---|-------------|-------------|-------------|
| C | -0.58256800 | -0.96576100 | -0.44509700 |
| N | -1.71282300 | -0.55922100 | -0.01615400 |
| S | 0.90916300  | 0.12530500  | -0.47341700 |
| O | -2.15874900 | 0.46393800  | 0.46243100  |
| O | 0.41555100  | 1.44911700  | -0.02619700 |
| O | 1.75965600  | -0.63537400 | 0.76289600  |
| H | -0.47949000 | -1.96715200 | -0.84178900 |
| H | 1.28637600  | -0.55005800 | 1.60708300  |

### Entry 155

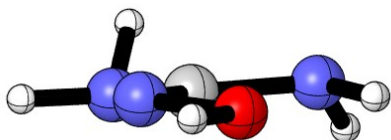

|   |            |            |            |
|---|------------|------------|------------|
| C | -0.2061835 | -0.1172180 | 0.0092639  |
| N | 0.8137165  | -0.9019200 | 0.0427959  |
| O | 2.0161645  | -0.1216650 | -0.0242841 |
| N | -1.4812655 | -0.6755200 | -0.0975531 |
| N | -0.1668865 | 1.2593450  | 0.0741609  |
| H | 2.6993915  | -0.7976860 | -0.0127141 |
| H | -1.4436905 | -1.6869210 | -0.1077141 |
| H | -2.1260025 | -0.3359790 | 0.6068069  |
| H | -0.8685375 | 1.7333760  | -0.4758581 |
| H | 0.7632935  | 1.6441880  | -0.0149041 |

### 155-radical

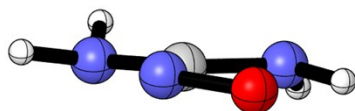

|   |           |            |            |
|---|-----------|------------|------------|
| C | 0.0875023 | -0.1705898 | -0.0013822 |
| N | 1.2703173 | -0.8357628 | -0.0017742 |

|   |            |            |            |
|---|------------|------------|------------|
| O | 2.2827853  | -0.0340958 | -0.0445892 |
| N | -1.0405647 | -0.9211558 | -0.0694602 |
| N | 0.0239773  | 1.1722272  | 0.0706018  |
| H | -0.8825697 | -1.9165488 | 0.0075798  |
| H | -1.9000827 | -0.5700958 | 0.3230128  |
| H | -0.7823767 | 1.6729462  | -0.2651012 |
| H | 0.9410113  | 1.6030752  | -0.0188872 |

**Entry 156**

**156-radical**

**Entry 157**

**157-radical**

**Entry 158**

**158-radical**

**Entry 159**

**159-radical**

**Entry 160**

**160-radical**

**Entry 161**

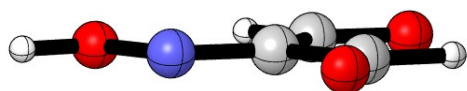

|   |            |            |            |
|---|------------|------------|------------|
| C | 0.1381019  | -0.1221692 | 0.0279427  |
| N | -0.7822341 | -1.0209632 | -0.0222453 |
| C | 1.5455429  | -0.6149532 | 0.2524617  |
| C | -0.0898901 | 1.3491608  | -0.1185453 |
| O | -2.0420661 | -0.5186352 | -0.2280133 |
| O | 1.8442379  | -1.7747332 | 0.3831647  |
| O | 0.8207889  | 2.1444038  | -0.0610023 |
| H | 2.2953939  | 0.1927738  | 0.2871157  |
| H | -1.1297351 | 1.6715848  | -0.2816393 |
| H | -2.6001401 | -1.3064692 | -0.2392393 |

**161-radical**



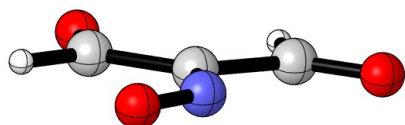

|   |            |            |            |
|---|------------|------------|------------|
| C | -0.0438273 | -0.2328280 | 0.0000277  |
| N | -0.7854793 | -1.3057270 | 0.0001657  |
| C | 1.4370457  | -0.3841790 | 0.0001637  |
| C | -0.7088313 | 1.0974580  | -0.0002733 |
| O | -1.9711883 | -1.5000950 | 0.0001147  |
| O | 2.0068307  | -1.4479720 | 0.0003767  |
| O | -0.0947203 | 2.1347380  | -0.0003393 |
| H | 1.9761817  | 0.5776650  | 0.0000557  |
| H | -1.8160113 | 1.0609400  | -0.0002913 |

### Entry 161

|   |             |             |             |
|---|-------------|-------------|-------------|
| C | 0.00419800  | -0.04389800 | 0.00001500  |
| N | -0.62267600 | -1.16835200 | 0.00009900  |
| C | 1.51051800  | -0.11557300 | 0.00014600  |
| C | -0.64793000 | 1.30257100  | -0.00020100 |
| O | -1.98896500 | -1.04546200 | 0.00002100  |
| O | 2.13961300  | -1.14301200 | -0.00012300 |
| O | 0.00003500  | 2.32492200  | 0.00015800  |
| H | 1.99910600  | 0.87295100  | -0.00019700 |
| H | -1.74868600 | 1.31558800  | -0.00079700 |
| H | -2.29787300 | -1.96024700 | 0.00009600  |

### 161-radical

|   |             |             |             |
|---|-------------|-------------|-------------|
| C | -0.00356300 | -0.01763900 | 0.00000500  |
| N | -0.27677900 | -1.29298900 | -0.00013300 |
| C | -1.12853700 | 0.95720600  | -0.00013200 |
| C | 1.42099900  | 0.40957500  | 0.00030600  |
| O | 0.39414400  | -2.28975600 | -0.00008300 |
| O | -2.29375900 | 0.64325000  | -0.00034500 |
| O | 1.75566700  | 1.56762500  | 0.00037200  |
| H | -0.79743600 | 2.00895900  | -0.00002300 |
| H | 2.15307800  | -0.42183500 | 0.00032400  |

### Entry 162

|    |             |             |             |
|----|-------------|-------------|-------------|
| C  | -0.02522800 | 0.45212300  | 0.12395800  |
| N  | -0.44356000 | 1.68132900  | 0.07184800  |
| C  | -1.08649100 | -0.58536600 | 0.34182500  |
| C  | 1.41559200  | 0.09460800  | 0.03653200  |
| O  | 0.41032300  | 2.69472000  | 0.02140400  |
| O  | -0.91868700 | -1.58232100 | 0.96296400  |
| Cl | -2.67130000 | -0.20211900 | -0.38695800 |
| O  | 2.28298700  | 0.92707800  | 0.12594600  |

|    |            |             |             |
|----|------------|-------------|-------------|
| Cl | 1.83281300 | -1.57495700 | -0.34682300 |
| H  | 1.33896900 | 2.35698300  | 0.07495100  |

### 162-radical

|    |             |             |             |
|----|-------------|-------------|-------------|
| C  | -0.05349700 | 0.37251500  | 0.05209600  |
| N  | -0.61714000 | 1.54971700  | -0.00332800 |
| C  | -0.95972400 | -0.79794300 | 0.13963100  |
| C  | 1.44534900  | 0.35372200  | 0.06304100  |
| O  | -0.20278100 | 2.66807300  | -0.03565200 |
| O  | -0.64685900 | -1.91364100 | 0.37939500  |
| Cl | -2.69777800 | -0.37493800 | -0.14093400 |
| O  | 2.09314700  | 1.34294300  | 0.18730800  |
| Cl | 2.21419900  | -1.22487200 | -0.19751900 |

### Entry 163

|   |             |             |             |
|---|-------------|-------------|-------------|
| C | 0.03281700  | -0.23399700 | 0.00002500  |
| N | 0.35440800  | -1.47813700 | 0.00004500  |
| C | -1.46785800 | -0.03274200 | 0.00018400  |
| C | 0.99419800  | 0.95409700  | -0.00004600 |
| O | 1.66709200  | -1.79569300 | 0.00001100  |
| O | -1.96790600 | 1.07197000  | 0.00022800  |
| O | -2.21566000 | -1.13091200 | -0.00020400 |
| O | 2.18374600  | 0.80091800  | 0.00007600  |
| O | 0.41781800  | 2.15662900  | -0.00018700 |
| H | 1.66929200  | -2.76285900 | 0.00004400  |
| H | -1.62229000 | -1.90363500 | -0.00038300 |
| H | -0.56351900 | 2.06600900  | -0.00034700 |

### 163-radical

|   |             |             |             |
|---|-------------|-------------|-------------|
| C | 0.00869500  | 0.24691100  | 0.00003100  |
| N | 0.35854200  | 1.49647300  | -0.00005500 |
| C | -1.44390100 | -0.06733300 | -0.00016000 |
| C | 1.09630800  | -0.81548000 | 0.00028200  |
| O | 1.43484500  | 2.04049500  | 0.00005000  |
| O | -1.83497600 | -1.21563800 | -0.00027000 |
| O | -2.31156200 | 0.94859700  | -0.00032000 |
| O | 2.25399000  | -0.49616000 | 0.00029300  |
| O | 0.66911600  | -2.07322300 | 0.00018500  |
| H | -1.85078100 | 1.80061800  | -0.00024600 |
| H | -0.31693200 | -2.09309100 | 0.00020900  |

### Entry 164

|   |             |             |             |
|---|-------------|-------------|-------------|
| C | 0.13882700  | 0.61602700  | -0.13054300 |
| N | 0.68894500  | 1.74222300  | 0.07981300  |
| S | -1.69802600 | 0.60539500  | -0.29478700 |
| S | 0.94828200  | -1.01443700 | -0.42394300 |

|   |             |             |             |
|---|-------------|-------------|-------------|
| O | 2.02359100  | 1.89561800  | 0.22536100  |
| O | -1.91917800 | -0.56700800 | -1.18783900 |
| O | -2.03933000 | 0.18208900  | 1.27805100  |
| O | 2.38947100  | -0.72524700 | -0.14109900 |
| O | 0.20510300  | -1.67627600 | 0.97359500  |
| H | 2.46536900  | 1.01596500  | 0.17598400  |
| H | -1.51890200 | -0.60430300 | 1.52693600  |
| H | 0.11660400  | -2.63212100 | 0.83679200  |

#### 164-radical

|   |             |             |             |
|---|-------------|-------------|-------------|
| C | 0.14119200  | 0.61775200  | -0.12047700 |
| N | 0.74618800  | 1.70537100  | 0.11502200  |
| S | -1.69629800 | 0.58434100  | -0.24621500 |
| S | 1.06663100  | -0.97421300 | -0.44369000 |
| O | 1.87368900  | 2.13001000  | 0.23691200  |
| O | -1.92884400 | -0.49992600 | -1.23508400 |
| O | -1.99524500 | 0.02314200  | 1.28705600  |
| O | 2.46217400  | -0.68053100 | -0.07268900 |
| O | 0.24026600  | -1.71900500 | 0.88072100  |
| H | -1.43744700 | -0.76066400 | 1.45970900  |
| H | 0.22534700  | -2.67500700 | 0.72115800  |

#### Entry 165

|   |             |             |             |
|---|-------------|-------------|-------------|
| C | -0.02756500 | -0.02152200 | 0.01888800  |
| N | -1.04380200 | -0.82324600 | -0.00495200 |
| C | 1.28447500  | -0.67528800 | 0.04898000  |
| C | 2.46545400  | -0.06086100 | -0.05305000 |
| N | -0.12529900 | 1.34879400  | -0.03490900 |
| O | -2.24815400 | -0.07558400 | -0.02920900 |
| H | 1.22980700  | -1.75225600 | 0.16097900  |
| H | 3.38900900  | -0.62503100 | -0.01531900 |
| H | 2.56245800  | 1.00995000  | -0.19615800 |
| H | 0.62736800  | 1.87880200  | 0.37400800  |
| H | -1.05006800 | 1.72068600  | 0.12458500  |
| H | -2.92382000 | -0.76028100 | -0.02430100 |

#### 165-radical

|   |             |             |             |
|---|-------------|-------------|-------------|
| C | -0.06105700 | 0.00729800  | -0.00025600 |
| N | -1.16102800 | -0.82501300 | -0.00032200 |
| C | 1.22090600  | -0.65494800 | -0.00032100 |
| C | 2.42442200  | -0.05903600 | 0.00048400  |
| N | -0.23452300 | 1.33317200  | -0.00057200 |
| O | -2.26100200 | -0.19938700 | 0.00064800  |
| H | 1.13887400  | -1.73631500 | -0.00083800 |
| H | 3.33441800  | -0.64559600 | 0.00061600  |
| H | 2.55285000  | 1.01857300  | 0.00114500  |

|   |             |            |            |
|---|-------------|------------|------------|
| H | 0.52368900  | 1.99197200 | 0.00012900 |
| H | -1.19858600 | 1.64946700 | 0.00058100 |

### Entry 166

|    |             |             |             |
|----|-------------|-------------|-------------|
| C  | 0.62055900  | -0.10433700 | 0.03153700  |
| N  | 1.64920800  | 0.67133200  | -0.05318800 |
| C  | -0.68097600 | 0.63918800  | 0.03452300  |
| N  | 0.65445500  | -1.46079400 | 0.15237300  |
| O  | 2.81602800  | -0.10451200 | -0.05886200 |
| O  | -0.83876800 | 1.80586400  | 0.07975400  |
| Cl | -2.14433200 | -0.46758800 | -0.06372000 |
| H  | -0.18595400 | -1.98870100 | -0.01474900 |
| H  | 1.54186500  | -1.90788100 | -0.01883200 |
| H  | 3.51651900  | 0.55190400  | -0.14096900 |

### 166-radical

|    |             |             |             |
|----|-------------|-------------|-------------|
| C  | 0.63786800  | -0.18417500 | 0.01340500  |
| N  | 1.73521800  | 0.50614800  | -0.02859700 |
| C  | -0.59776300 | 0.62920300  | 0.01707900  |
| N  | 0.63938400  | -1.56240100 | 0.11571400  |
| O  | 2.89659200  | 0.10106700  | -0.03180400 |
| O  | -0.67139200 | 1.81012500  | 0.03292700  |
| Cl | -2.11454000 | -0.38327800 | -0.02713700 |
| H  | -0.20936900 | -2.02909600 | -0.16786700 |
| H  | 1.49210400  | -2.02111700 | -0.17251300 |

### Entry 167

|   |             |             |             |
|---|-------------|-------------|-------------|
| C | 0.42151600  | -0.02915800 | -0.00062100 |
| N | -0.57751500 | -0.83900600 | 0.02932600  |
| N | 1.71411900  | -0.49155400 | -0.08600000 |
| O | 0.33177100  | 1.31201400  | -0.00235900 |
| O | -1.78282000 | -0.05379400 | -0.02871400 |
| H | 2.39777000  | 0.08355900  | 0.38558900  |
| H | 1.80952700  | -1.48122300 | 0.08929300  |
| H | -0.61330800 | 1.52806000  | 0.05002500  |
| H | -2.47092200 | -0.70728300 | 0.12412000  |

### 167-radical

|   |             |             |             |
|---|-------------|-------------|-------------|
| C | 0.38823300  | 0.00838300  | -0.00009600 |
| N | -0.66017600 | -0.85185100 | 0.00008400  |
| N | 1.63852100  | -0.45683900 | 0.00029700  |
| O | 0.19734800  | 1.30582800  | -0.00009900 |
| O | -1.76972000 | -0.17530100 | 0.00001600  |
| H | 2.42613400  | 0.16934100  | 0.00024300  |
| H | 1.77715100  | -1.45518900 | -0.00168500 |
| H | -0.80212100 | 1.35216100  | 0.00001800  |

**Entry 168**

|   |             |             |             |
|---|-------------|-------------|-------------|
| C | 0.06929600  | -0.12134300 | 0.00005100  |
| N | 1.14025000  | -0.82708600 | -0.00020200 |
| O | -1.10748200 | -0.74652200 | 0.00068000  |
| O | 0.02177500  | 1.22066200  | 0.00023800  |
| O | 2.24910200  | 0.09062200  | 0.00023200  |
| C | -2.30413000 | 0.04870400  | -0.00047900 |
| H | 0.94400700  | 1.52841900  | -0.00049100 |
| H | 3.01065300  | -0.49608100 | -0.00250100 |
| H | -2.35827500 | 0.67392400  | -0.89328100 |
| H | -2.35926100 | 0.67494800  | 0.89155400  |
| H | -3.11703100 | -0.67386900 | -0.00050300 |

**168-radical**

|   |             |             |             |
|---|-------------|-------------|-------------|
| C | -0.10425900 | -0.09648200 | 0.00007600  |
| N | -1.24628300 | -0.81580500 | 0.00020600  |
| O | 1.03716600  | -0.72753700 | 0.00001500  |
| O | -0.12532500 | 1.21253300  | 0.00005000  |
| O | -2.25386000 | 0.00612800  | -0.00026200 |
| C | 2.25614400  | 0.05216500  | -0.00009900 |
| H | -1.11460300 | 1.38194600  | 0.00065200  |
| H | 2.30356000  | 0.67429700  | 0.89368300  |
| H | 2.30364000  | 0.67388100  | -0.89417000 |
| H | 3.05622800  | -0.68258100 | 0.00010400  |

**Entry 169**

|   |             |             |             |
|---|-------------|-------------|-------------|
| C | -0.02273100 | -0.05130400 | -0.00001500 |
| N | -1.06388100 | -0.79972900 | 0.00006500  |
| C | 1.30914200  | -0.67968700 | -0.00014900 |
| O | -0.08044000 | 1.29709400  | -0.00006300 |
| O | -2.26555200 | -0.14686800 | 0.00004800  |
| O | 2.30520300  | 0.01488000  | 0.00017200  |
| H | 1.32915300  | -1.77927700 | -0.00046900 |
| H | 0.83473000  | 1.62736500  | -0.00021000 |
| H | -2.10886800 | 0.81511000  | -0.00005300 |

**169-radical**

|   |             |             |             |
|---|-------------|-------------|-------------|
| C | 0.05542700  | 0.04655900  | 0.00009200  |
| N | 1.17984100  | -0.58891800 | -0.00002400 |
| C | -1.18803400 | -0.72649700 | 0.00036700  |
| O | -0.00560300 | 1.38918000  | 0.00008100  |
| O | 2.33648800  | -0.18551900 | -0.00013300 |
| O | -2.25930500 | -0.15287600 | -0.00030800 |
| H | -1.08437700 | -1.82288700 | 0.00013700  |
| H | -0.95150700 | 1.61865900  | 0.00015600  |

**Entry 170**

|   |             |             |             |
|---|-------------|-------------|-------------|
| C | -0.85590900 | 0.32687700  | 0.02353800  |
| N | -1.32464600 | -0.86845900 | 0.06710900  |
| N | 0.52195000  | 0.57068600  | 0.18747600  |
| O | -1.55607800 | 1.45909700  | -0.06001200 |
| O | -2.72281100 | -0.80795000 | -0.01284900 |
| N | 1.26015200  | -0.34829500 | -0.24423800 |
| C | 2.58347300  | -0.16519400 | -0.02837800 |
| N | 3.73770500  | -0.16648200 | 0.06958900  |
| H | -2.49834700 | 1.22871100  | -0.07530400 |
| H | -3.00205600 | -1.72012900 | 0.12768700  |

**170-radical**

|   |             |             |             |
|---|-------------|-------------|-------------|
| C | 0.88809900  | 0.37410900  | 0.00434300  |
| N | 1.35175700  | -0.94387900 | 0.02297100  |
| N | -0.41513300 | 0.62463400  | -0.07396300 |
| O | 1.73129500  | 1.38347300  | 0.01442600  |
| O | 2.57052700  | -1.03999400 | -0.11266700 |
| N | -1.21723000 | -0.26490300 | 0.38643400  |
| C | -2.49487600 | -0.13367600 | 0.01343200  |
| N | -3.63331800 | -0.15950000 | -0.21767300 |
| H | 2.62355400  | 1.01511600  | -0.14511900 |

**Entry 171**

|    |             |             |             |
|----|-------------|-------------|-------------|
| C  | -0.18170600 | 0.50411800  | 0.01721300  |
| N  | 1.04182500  | 0.83087600  | 0.05422700  |
| N  | -1.20550000 | 1.42064700  | -0.09971000 |
| Cl | -0.74038700 | -1.19050100 | -0.00279600 |
| O  | 2.01603200  | -0.14389000 | -0.01377100 |
| H  | -2.01253900 | 1.24275200  | 0.48352300  |
| H  | -0.87482600 | 2.37643100  | -0.04764800 |
| H  | 1.58166400  | -1.01491000 | -0.06307900 |

**171-radical**

|    |             |             |             |
|----|-------------|-------------|-------------|
| C  | -0.03838700 | 0.46936200  | 0.00000600  |
| N  | 1.29354500  | 0.48277000  | 0.00012700  |
| N  | -0.70230800 | 1.63551700  | -0.00010500 |
| Cl | -1.00632700 | -0.97891300 | 0.00000600  |
| O  | 1.88340600  | -0.64503300 | -0.00007200 |
| H  | -1.70744300 | 1.66991400  | 0.00028400  |
| H  | -0.16058600 | 2.48770400  | 0.00000500  |

**Entry 172**

|   |             |            |             |
|---|-------------|------------|-------------|
| C | -0.12319000 | 0.50596300 | -0.00002000 |
| N | 1.12961100  | 0.67681400 | -0.00002200 |

|    |             |             |            |
|----|-------------|-------------|------------|
| O  | -0.99374000 | 1.52669900  | 0.00000800 |
| Cl | -0.93601400 | -1.04449900 | 0.00000000 |
| O  | 1.96816800  | -0.41866600 | 0.00001200 |
| H  | -0.47665400 | 2.34675000  | 0.00007300 |
| H  | 1.42532600  | -1.22801000 | 0.00004400 |

### 172-radical

|    |             |             |             |
|----|-------------|-------------|-------------|
| C  | 0.00185400  | 0.45919500  | -0.00001800 |
| N  | 1.32478100  | 0.30920400  | -0.00000900 |
| O  | -0.49885200 | 1.67849200  | 0.00000900  |
| Cl | -1.15853000 | -0.79868700 | 0.00000100  |
| O  | 1.76819000  | -0.88302200 | 0.00001000  |
| H  | 0.25571900  | 2.29432900  | 0.00001500  |

### Entry 173

|    |             |             |             |
|----|-------------|-------------|-------------|
| C  | 0.00808800  | -0.37346300 | 0.00064700  |
| N  | -1.00509600 | -1.14735700 | -0.00014400 |
| C  | 1.35520700  | -0.92701500 | 0.00044600  |
| C  | 2.49635300  | -0.23571800 | -0.00054500 |
| Cl | -0.18512900 | 1.40323600  | 0.00011000  |
| O  | -2.26219200 | -0.62933200 | -0.00046700 |
| H  | 1.35888300  | -2.01207600 | 0.00119400  |
| H  | 3.44756200  | -0.75259300 | -0.00059700 |
| H  | 2.51823400  | 0.84673200  | -0.00136000 |
| H  | -2.20216500 | 0.34625200  | 0.00034600  |

### 173-radical

|    |             |             |             |
|----|-------------|-------------|-------------|
| C  | 0.04965300  | -0.29854500 | -0.00051400 |
| N  | 1.15019600  | -0.95663100 | -0.00014300 |
| C  | -1.22558200 | -0.99532900 | -0.00000200 |
| C  | -2.43143700 | -0.42198900 | 0.00016300  |
| Cl | 0.11157400  | 1.45954700  | 0.00003200  |
| O  | 2.33845900  | -0.67083700 | 0.00026000  |
| H  | -1.12674400 | -2.07635900 | 0.00020800  |
| H  | -3.32628400 | -1.03085300 | 0.00038200  |
| H  | -2.55857200 | 0.65320600  | -0.00009500 |

### Entry 174

|    |             |             |             |
|----|-------------|-------------|-------------|
| C  | -0.14044900 | -0.14085600 | -0.00004500 |
| N  | -0.75993100 | -1.24206800 | 0.00007200  |
| N  | 1.36467500  | -0.19179000 | -0.00005900 |
| Cl | -0.85709700 | 1.43505800  | 0.00015800  |
| O  | -2.10718200 | -1.24083200 | -0.00016900 |
| O  | 1.93593300  | 0.88329400  | -0.00033900 |
| O  | 1.87351000  | -1.29173400 | 0.00027300  |
| H  | -2.43795400 | -0.31965600 | -0.00062600 |

**174-radical**

|    |             |             |             |
|----|-------------|-------------|-------------|
| C  | 0.19264200  | -0.06094200 | 0.00043600  |
| N  | 0.86497900  | -1.14427700 | 0.00016100  |
| N  | -1.28617100 | -0.21799400 | 0.00001100  |
| Cl | 0.86301800  | 1.51499000  | -0.00011300 |
| O  | 2.04130700  | -1.42543400 | -0.00009300 |
| O  | -1.94305300 | 0.80517600  | 0.00010000  |
| O  | -1.70810600 | -1.36140300 | -0.00024500 |

**Entry 175**

|    |             |             |             |
|----|-------------|-------------|-------------|
| C  | 0.02825900  | -0.32132800 | -0.00009700 |
| N  | -0.95382900 | -1.13705200 | -0.00008600 |
| C  | 1.40211200  | -0.89625200 | 0.00006000  |
| Cl | -0.15541900 | 1.42407600  | 0.00000100  |
| O  | -2.21660100 | -0.66784500 | 0.00004900  |
| O  | 2.40901600  | -0.23905200 | 0.00000200  |
| H  | 1.39360900  | -2.00028100 | 0.00018800  |
| H  | -2.19622800 | 0.31101600  | 0.00022300  |

**175-radical**

|    |             |             |             |
|----|-------------|-------------|-------------|
| C  | -0.02955500 | -0.24460300 | 0.00005100  |
| N  | -1.11822900 | -0.93479200 | 0.00001100  |
| C  | 1.24660400  | -0.99329200 | 0.00023500  |
| Cl | -0.04870800 | 1.48967700  | 0.00000500  |
| O  | -2.30189600 | -0.67994000 | -0.00006500 |
| O  | 2.33390700  | -0.47806000 | -0.00013900 |
| H  | 1.09726000  | -2.08959600 | -0.00025000 |

**Entry 176**

|    |             |             |             |
|----|-------------|-------------|-------------|
| C  | 0.67425900  | -0.24936200 | 0.00020800  |
| N  | 1.51059800  | -1.22733400 | 0.00007800  |
| N  | -0.65510100 | -0.66496400 | 0.00011800  |
| N  | -1.50249200 | 0.26551000  | 0.00009600  |
| Cl | 1.11817200  | 1.42865200  | -0.00002400 |
| O  | 2.80923600  | -0.83875500 | -0.00016600 |
| C  | -2.79082000 | -0.13795100 | -0.00003100 |
| N  | -3.93609000 | -0.31324100 | -0.00016000 |
| H  | 3.29815100  | -1.67294900 | -0.00026000 |

**176-radical**

|    |             |             |             |
|----|-------------|-------------|-------------|
| C  | 0.70693300  | -0.21192900 | 0.00034700  |
| N  | 1.58284400  | -1.17367600 | 0.00010000  |
| N  | -0.59794300 | -0.63541000 | -0.00016800 |
| N  | -1.46194100 | 0.28660000  | -0.00045900 |
| Cl | 1.20340100  | 1.45265700  | 0.00004200  |



|   |             |             |             |
|---|-------------|-------------|-------------|
| O | 2.78495100  | -1.20337000 | -0.00010000 |
| C | -2.74202900 | -0.13481500 | -0.00000500 |
| N | -3.88394000 | -0.33290600 | 0.00024600  |

**Entry 177**

|   |             |             |             |
|---|-------------|-------------|-------------|
| C | 0.39107300  | -0.11847800 | -0.00001000 |
| N | -0.69734700 | -0.77884900 | -0.00001000 |
| O | 1.52311400  | -0.88263700 | 0.00000600  |
| C | 0.56255400  | 1.37053100  | 0.00000000  |
| O | -1.82572700 | 0.07740700  | 0.00000400  |
| H | 2.29340400  | -0.30659000 | 0.00001200  |
| H | 1.12253000  | 1.68569600  | -0.88661500 |
| H | 1.12264500  | 1.68567100  | 0.88655100  |
| H | -0.40400000 | 1.86831300  | 0.00006800  |
| H | -2.55400900 | -0.55162100 | 0.00002600  |

**177-radical**

|   |             |             |             |
|---|-------------|-------------|-------------|
| C | -0.34241700 | -0.10540200 | 0.00003900  |
| N | 0.82197300  | -0.75691000 | -0.00006900 |
| O | -1.40677300 | -0.91311200 | 0.00002000  |
| C | -0.53734400 | 1.37315500  | -0.00001500 |
| O | 1.84545400  | 0.02046000  | 0.00003600  |
| H | -2.22116400 | -0.39622200 | -0.00004400 |
| H | -1.09956000 | 1.68403500  | 0.88688000  |
| H | -1.09927400 | 1.68407000  | -0.88707900 |
| H | 0.43530900  | 1.86118900  | 0.00014500  |

**Entry 178**

|   |             |             |             |
|---|-------------|-------------|-------------|
| C | 0.02918700  | -0.02440900 | 0.00003300  |
| N | 1.04654200  | -0.81355700 | 0.00001100  |
| C | -1.26104200 | -0.72181500 | 0.00003400  |
| C | 0.09558900  | 1.47795100  | 0.00003100  |
| O | 2.27248900  | -0.13263500 | -0.00004900 |
| C | -2.46001900 | -0.13058200 | -0.00004200 |
| H | -1.18691600 | -1.80493000 | 0.00007400  |
| H | -0.41466700 | 1.87684400  | 0.88129600  |
| H | -0.41354800 | 1.87681400  | -0.88190200 |
| H | 1.12489800  | 1.82625000  | 0.00064200  |
| H | 2.91113100  | -0.85339300 | 0.00002200  |
| H | -3.36931600 | -0.71928400 | -0.00005900 |
| H | -2.57957100 | 0.94681000  | -0.00009800 |

**178-radical**

|   |             |             |             |
|---|-------------|-------------|-------------|
| C | -0.06845400 | 0.01942300  | -0.00002100 |
| N | -1.16910100 | -0.66253300 | 0.00000400  |
| C | 1.17303500  | -0.74217900 | -0.00001900 |

|   |             |             |             |
|---|-------------|-------------|-------------|
| C | -0.09927600 | 1.52637600  | -0.00000900 |
| O | -2.35682900 | -0.35704900 | 0.00001600  |
| C | 2.40074400  | -0.20893900 | 0.00002000  |
| H | 1.05186800  | -1.82128700 | -0.00004400 |
| H | 0.41317700  | 1.91840200  | -0.88332400 |
| H | 0.41257100  | 1.91838400  | 0.88366900  |
| H | -1.12599200 | 1.89005200  | -0.00035200 |
| H | 3.27976800  | -0.84103800 | 0.00002200  |
| H | 2.57065500  | 0.86151600  | 0.00005500  |

### Entry 179

|   |             |             |             |
|---|-------------|-------------|-------------|
| C | -0.00407700 | 0.00803700  | 0.00003700  |
| N | 0.98324400  | -0.81425100 | -0.00008900 |
| C | -1.32038100 | -0.68715900 | -0.00011700 |
| C | 0.08561400  | 1.50041000  | -0.00008600 |
| O | 2.20680500  | -0.16562600 | 0.00015000  |
| O | -2.38136400 | -0.10623500 | 0.00018000  |
| H | -1.25109200 | -1.79026600 | -0.00051200 |
| H | 0.63495500  | 1.84873600  | 0.87851700  |
| H | -0.91595800 | 1.92833200  | 0.00063300  |
| H | 0.63350100  | 1.84874600  | -0.87961500 |
| H | 2.84542700  | -0.88863900 | -0.00004200 |

### 179-radical

|   |             |             |             |
|---|-------------|-------------|-------------|
| C | -0.03113500 | 0.05718500  | 0.00006600  |
| N | -1.11227000 | -0.66168700 | 0.00008200  |
| C | 1.22042200  | -0.71811800 | -0.00010300 |
| C | -0.06722300 | 1.55748900  | -0.00005200 |
| O | -2.29450600 | -0.38230900 | -0.00001000 |
| O | 2.31918400  | -0.20889800 | 0.00009200  |
| H | 1.08082600  | -1.81602400 | -0.00047200 |
| H | -0.59031300 | 1.93241900  | -0.88416100 |
| H | 0.95550000  | 1.93320800  | -0.00029900 |
| H | -0.58992600 | 1.93252900  | 0.88424000  |

### Entry 180

|   |             |             |             |
|---|-------------|-------------|-------------|
| C | -0.86799600 | 0.31369100  | -0.04251300 |
| N | -1.26649700 | -0.90660900 | -0.08626800 |
| N | 0.51636500  | 0.54187800  | -0.22849100 |
| C | -1.72708300 | 1.53397600  | 0.06177400  |
| O | -2.64222000 | -0.99256100 | 0.02633700  |
| N | 1.26936400  | -0.32714800 | 0.28074000  |
| C | 2.58953100  | -0.14898000 | 0.03809400  |
| N | 3.74290800  | -0.14069800 | -0.07084600 |
| H | -2.12671700 | 1.62559400  | 1.07599500  |
| H | -2.57840800 | 1.46083000  | -0.61793400 |

|   |             |             |             |
|---|-------------|-------------|-------------|
| H | -1.13993800 | 2.42162900  | -0.16954200 |
| H | -2.81886600 | -1.93165600 | -0.10929300 |

### 180-radical

|   |             |             |             |
|---|-------------|-------------|-------------|
| C | -0.91846500 | 0.35518900  | -0.00016300 |
| N | -1.34499300 | -0.88550400 | -0.00018500 |
| N | 0.43938200  | 0.61560700  | -0.00077700 |
| C | -1.87746400 | 1.50938700  | 0.00023700  |
| O | -2.46688600 | -1.33396000 | -0.00021900 |
| N | 1.19860000  | -0.39964500 | 0.00139300  |
| C | 2.51598700  | -0.13071200 | 0.00013700  |
| N | 3.67392700  | -0.06289100 | -0.00052300 |
| H | -2.51844900 | 1.47936200  | 0.88564700  |
| H | -2.52284100 | 1.47627300  | -0.88184400 |
| H | -1.31238900 | 2.43989300  | -0.00266900 |

### Entry 181

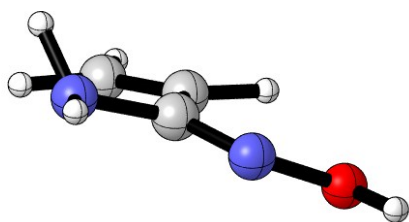

|   |            |            |            |
|---|------------|------------|------------|
| C | -0.4085066 | 0.0877002  | 0.3859588  |
| N | -0.4362806 | 0.2115482  | 1.6688568  |
| C | 0.8117784  | 0.0031872  | -0.4271112 |
| O | 0.8552034  | 0.1197492  | 2.2404367  |
| C | 0.8422904  | -0.4345378 | -1.6885683 |
| N | -1.6412426 | -0.0109708 | -0.2627063 |
| H | 1.7187314  | 0.3237202  | 0.0694768  |
| H | 0.6767844  | 0.2845342  | 3.1713527  |
| H | 1.7708724  | -0.4575468 | -2.2467733 |
| H | -0.0432436 | -0.8070428 | -2.1911132 |
| H | -1.7242056 | 0.5667682  | -1.0891632 |
| H | -2.4221816 | 0.1128902  | 0.3693538  |

### 181-radical

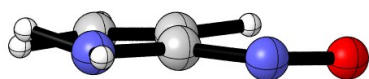

|   |            |            |            |
|---|------------|------------|------------|
| C | -0.3156573 | 0.0511880  | 0.6679348  |
| N | -0.2778783 | 0.0856670  | 2.0333358  |
| C | 0.8691937  | -0.0155580 | -0.1657062 |
| O | 0.8789207  | 0.0251510  | 2.5453368  |

|   |            |            |            |
|---|------------|------------|------------|
| C | 0.8818387  | -0.1904170 | -1.4939882 |
| N | -1.5657163 | 0.0684480  | 0.1544288  |
| H | 1.7922897  | 0.0790370  | 0.3935048  |
| H | 1.8168067  | -0.2200620 | -2.0404072 |
| H | -0.0174553 | -0.3290870 | -2.0861062 |
| H | -1.7354173 | 0.2634920  | -0.8173582 |
| H | -2.3269253 | 0.1821410  | 0.8090248  |

### Entry 182

|   |             |             |             |
|---|-------------|-------------|-------------|
| C | -0.02918100 | -0.02440000 | 0.00102000  |
| N | -1.04657300 | -0.81352500 | 0.00011600  |
| C | 1.26100800  | -0.72180200 | 0.00090000  |
| O | -2.27239800 | -0.13268600 | -0.00114400 |
| C | 2.46001900  | -0.13061200 | -0.00098900 |
| C | -0.09562200 | 1.47800500  | 0.00070900  |
| H | 1.18686000  | -1.80492600 | 0.00163300  |
| H | -2.91102600 | -0.85346500 | 0.00070100  |
| H | 3.36925000  | -0.71939200 | -0.00164600 |
| H | 2.57950900  | 0.94678200  | -0.00230200 |
| H | -1.12477900 | 1.82625200  | 0.01878000  |
| H | 0.39764700  | 1.87592700  | -0.89075400 |
| H | 0.43039600  | 1.87783700  | 0.87210100  |

### 182-radical

|   |             |             |             |
|---|-------------|-------------|-------------|
| C | 0.06867900  | 0.01927300  | -0.00004700 |
| N | 1.16922700  | -0.66242300 | 0.00000500  |
| C | -1.17296800 | -0.74232800 | -0.00003900 |
| O | 2.35687000  | -0.35681200 | 0.00003600  |
| C | -2.40058100 | -0.20899900 | 0.00004200  |
| C | 0.09883100  | 1.52642400  | -0.00001900 |
| H | -1.05183000 | -1.82144700 | -0.00008900 |
| H | -3.27959200 | -0.84110500 | 0.00004800  |
| H | -2.57042000 | 0.86146400  | 0.00011300  |
| H | 1.12544200  | 1.89039900  | -0.00071900 |
| H | -0.41283500 | 1.91794400  | 0.88392800  |
| H | -0.41407400 | 1.91798300  | -0.88321900 |

### Entry 183

|   |             |             |             |
|---|-------------|-------------|-------------|
| C | 0.05613400  | -0.48287600 | 0.00005100  |
| N | -0.91574000 | -1.34141300 | 0.00027500  |
| C | 1.40912800  | -1.04313400 | -0.00008900 |
| O | -2.20387900 | -0.99370700 | 0.00026400  |
| C | 2.60598600  | -0.44860000 | -0.00041700 |
| N | -0.16994900 | 0.98307400  | 0.00000100  |
| O | -1.35084200 | 1.37953100  | -0.00096200 |
| O | 0.78446700  | 1.73159200  | 0.00096800  |

|   |             |             |             |
|---|-------------|-------------|-------------|
| H | 1.35728700  | -2.12691200 | -0.00000300 |
| H | -2.26164900 | -0.00566300 | -0.00027600 |
| H | 3.49273000  | -1.07133500 | -0.00059900 |
| H | 2.74599900  | 0.62062000  | -0.00048400 |

#### 183-radical

|   |             |             |             |
|---|-------------|-------------|-------------|
| C | -0.03548500 | -0.46227600 | -0.00002700 |
| N | 1.00133400  | -1.23655900 | -0.00005500 |
| C | -1.36431900 | -1.06079000 | 0.00007600  |
| O | 2.20002600  | -1.07261200 | -0.00010900 |
| C | -2.56790900 | -0.47923800 | 0.00007200  |
| N | 0.22627400  | 1.00599600  | -0.00009900 |
| O | 1.38961000  | 1.37278800  | 0.00032900  |
| O | -0.75546300 | 1.73619100  | -0.00021900 |
| H | -1.30210000 | -2.14470700 | 0.00019200  |
| H | -3.44958200 | -1.10860200 | 0.00020500  |
| H | -2.70867200 | 0.59013800  | -0.00006000 |

#### Entry 184

|    |             |             |             |
|----|-------------|-------------|-------------|
| C  | -0.46825300 | 0.62307500  | -0.03656000 |
| N  | -1.73682400 | 0.86830900  | -0.23753900 |
| C  | 0.37624300  | 1.82551100  | -0.09360900 |
| O  | -2.66644000 | -0.09429400 | -0.14687600 |
| C  | 1.61296700  | 2.00262100  | 0.37559800  |
| C  | -0.00755300 | -0.77405700 | 0.18381100  |
| O  | -0.72583200 | -1.66080700 | 0.56154000  |
| Cl | 1.66811300  | -1.17898000 | -0.29645200 |
| H  | -0.15642400 | 2.66904800  | -0.52106400 |
| H  | -2.26120200 | -0.92568100 | 0.18863300  |
| H  | 2.07889800  | 2.97749800  | 0.29896300  |
| H  | 2.19631400  | 1.22154300  | 0.84317800  |

#### 184-radical

|    |             |             |             |
|----|-------------|-------------|-------------|
| C  | -0.52050400 | 0.55527300  | -0.02310400 |
| N  | -1.82477000 | 0.63267300  | -0.12249600 |
| C  | 0.18726500  | 1.83826500  | -0.07031800 |
| O  | -2.72153600 | -0.17405600 | -0.10727200 |
| C  | 1.44946000  | 2.13255900  | 0.25141200  |
| C  | -0.00689100 | -0.83882800 | 0.12323000  |
| O  | -0.68214400 | -1.78318500 | 0.36969800  |
| Cl | 1.75639000  | -1.06496200 | -0.19511200 |
| H  | -0.46927400 | 2.64710900  | -0.37707100 |
| H  | 1.78528300  | 3.15978500  | 0.17974500  |
| H  | 2.17221800  | 1.40304500  | 0.58496200  |

#### Entry 185

|   |             |             |             |
|---|-------------|-------------|-------------|
| C | 0.16049300  | -0.26290900 | -0.00002500 |
| N | 1.29357100  | -0.89098500 | 0.00001600  |
| C | -1.01340500 | -1.14318400 | -0.00002300 |
| O | 2.40782600  | -0.06346300 | 0.00007000  |
| C | -2.30052200 | -0.78088200 | -0.00000400 |
| C | 0.08238500  | 1.23801100  | -0.00017800 |
| O | -0.95629100 | 1.85760200  | 0.00016000  |
| H | -0.75025200 | -2.19714900 | -0.00003000 |
| H | 3.14073800  | -0.68909200 | 0.00010200  |
| H | -3.06997300 | -1.54440300 | -0.00000600 |
| H | -2.61454800 | 0.25276600  | 0.00001100  |
| H | 1.05304800  | 1.75545600  | -0.00065400 |

### 185-radical

|   |             |             |             |
|---|-------------|-------------|-------------|
| C | -0.18636600 | -0.23952500 | 0.00000500  |
| N | -1.39380600 | -0.74087000 | 0.00000200  |
| C | 0.94137200  | -1.16625400 | 0.00001100  |
| O | -2.50450700 | -0.24864400 | -0.00000800 |
| C | 2.23735900  | -0.83621100 | -0.00001200 |
| C | -0.10749000 | 1.24939900  | -0.00000800 |
| O | 0.92097000  | 1.87836000  | 0.00000800  |
| H | 0.65115300  | -2.21277300 | 0.00003200  |
| H | 2.98869000  | -1.61661600 | -0.00001200 |
| H | 2.57548400  | 0.19031800  | -0.00002700 |
| H | -1.09963400 | 1.74297900  | 0.00001200  |

### Entry 186

|   |             |             |             |
|---|-------------|-------------|-------------|
| C | 1.01269600  | 0.19604000  | -0.01300200 |
| N | 1.27630300  | 1.46015700  | 0.02896800  |
| C | 2.14407200  | -0.72594700 | 0.07743800  |
| O | 0.18014800  | 2.29031600  | -0.07425800 |
| C | 2.05476500  | -2.05446700 | -0.02760000 |
| N | -0.25117600 | -0.38002400 | -0.30968900 |
| N | -1.20553400 | 0.04346500  | 0.38328900  |
| C | -2.42157100 | -0.46397000 | 0.05510900  |
| N | -3.52078100 | -0.79913400 | -0.08709600 |
| H | 3.09654200  | -0.23763400 | 0.25230600  |
| H | 0.57873600  | 3.16411700  | -0.16513400 |
| H | 2.93968800  | -2.67308700 | 0.05473700  |
| H | 1.11239800  | -2.55711000 | -0.20781700 |

### 186-radical

|   |             |             |             |
|---|-------------|-------------|-------------|
| C | 0.98384000  | 0.22654600  | 0.00009900  |
| N | 0.96059400  | 1.55470300  | -0.00008500 |
| C | 2.27148400  | -0.45797700 | 0.00038200  |
| O | -0.00517300 | 2.28516000  | -0.00024100 |

|   |             |             |             |
|---|-------------|-------------|-------------|
| C | 2.43006100  | -1.78346000 | -0.00041700 |
| N | -0.18981300 | -0.49791800 | 0.00036200  |
| N | -1.26419300 | 0.16391400  | -0.00015600 |
| C | -2.40889300 | -0.54011700 | 0.00003000  |
| N | -3.47180000 | -1.00321000 | 0.00007600  |
| H | 3.12978700  | 0.20514900  | 0.00144400  |
| H | 3.42235600  | -2.21597900 | 0.00000100  |
| H | 1.58677800  | -2.46282100 | -0.00144600 |

### Entry 187

|   |             |             |             |
|---|-------------|-------------|-------------|
| C | 0.02838700  | 0.65880500  | -0.01073900 |
| N | 1.30132700  | 0.79050700  | 0.07133300  |
| N | -0.81025700 | 1.74049000  | -0.14403900 |
| N | -0.69883700 | -0.63698100 | -0.01387300 |
| O | 2.15022100  | -0.27064000 | 0.04765700  |
| O | -1.90911700 | -0.60846900 | 0.11755800  |
| O | -0.02478000 | -1.67022000 | -0.11097100 |
| H | -1.71929700 | 1.64766100  | 0.28747800  |
| H | -0.35035600 | 2.62813900  | 0.00110500  |
| H | 1.62310200  | -1.09211600 | -0.05204500 |

### 187-radical

|   |             |             |             |
|---|-------------|-------------|-------------|
| C | 0.09508500  | 0.62413400  | -0.00929000 |
| N | 1.37146800  | 0.54929200  | 0.02414700  |
| N | -0.61891400 | 1.79612100  | -0.11554000 |
| N | -0.71747600 | -0.61774400 | -0.00771400 |
| O | 2.17291200  | -0.38564200 | 0.03801600  |
| O | -1.93247700 | -0.45518500 | 0.07343000  |
| O | -0.13031300 | -1.68270400 | -0.06712100 |
| H | -1.57160900 | 1.72345600  | 0.21567600  |
| H | -0.12542500 | 2.62630900  | 0.17921300  |

### Entry 188

|   |             |             |             |
|---|-------------|-------------|-------------|
| C | 0.09649800  | 0.65430300  | -0.00009400 |
| N | 1.36383500  | 0.72046200  | 0.00009800  |
| O | -0.63680100 | 1.76292800  | -0.00024700 |
| N | -0.75723700 | -0.59696900 | 0.00007700  |
| O | 2.06116200  | -0.46558500 | 0.00011600  |
| O | -1.97169000 | -0.37586300 | 0.00029700  |
| O | -0.23157700 | -1.68521300 | -0.00033500 |
| H | -1.57159500 | 1.48224400  | 0.00035800  |
| H | 2.97766500  | -0.16265300 | 0.00032600  |

### 188-radical

|   |            |            |             |
|---|------------|------------|-------------|
| C | 0.11976500 | 0.62857400 | 0.00007500  |
| N | 1.39104200 | 0.54228200 | -0.00009400 |

|   |             |             |             |
|---|-------------|-------------|-------------|
| O | -0.52669700 | 1.79232200  | 0.00022700  |
| N | -0.72959100 | -0.58470400 | 0.00008600  |
| O | 2.17767900  | -0.39686100 | -0.00023100 |
| O | -1.94155200 | -0.35407900 | -0.00046600 |
| O | -0.19323100 | -1.67345100 | 0.00039200  |
| H | -1.47835300 | 1.58205900  | 0.00023100  |

### Entry 189

|   |             |             |             |
|---|-------------|-------------|-------------|
| C | 0.08676600  | 0.64436200  | 0.00006400  |
| N | 1.35126300  | 0.69045700  | 0.00001700  |
| F | -0.60865200 | 1.76235500  | 0.00001400  |
| N | -0.78609900 | -0.54453300 | 0.00002300  |
| O | 2.11159400  | -0.41904300 | -0.00007400 |
| O | -1.98392100 | -0.38974800 | -0.00010000 |
| O | -0.19244500 | -1.63411300 | 0.00009000  |
| H | 1.51931000  | -1.20560700 | -0.00012100 |

### 189-radical

|   |             |             |             |
|---|-------------|-------------|-------------|
| C | 0.15509900  | 0.59187300  | -0.00001600 |
| N | 1.41064800  | 0.42000300  | -0.00001300 |
| F | -0.36567400 | 1.79772000  | 0.00000600  |
| N | -0.82672700 | -0.51339700 | 0.00002600  |
| O | 2.14334900  | -0.55464800 | 0.00001000  |
| O | -1.99995500 | -0.19032100 | -0.00000700 |
| O | -0.35926600 | -1.63965200 | -0.00001000 |

### Entry 190

|   |             |             |             |
|---|-------------|-------------|-------------|
| C | -0.05055200 | 0.64331500  | 0.00004000  |
| N | 1.20229500  | 0.92292600  | 0.00009400  |
| C | -1.07332700 | 1.73201800  | 0.00017700  |
| N | -0.58814000 | -0.73902200 | -0.00002600 |
| O | 2.16068000  | -0.01956600 | -0.00030000 |
| O | -1.79551500 | -0.87934100 | -0.00048800 |
| O | 0.22196900  | -1.68276700 | 0.00062400  |
| H | -1.71539000 | 1.66724200  | 0.88138400  |
| H | -1.71555700 | 1.66731800  | -0.88091300 |
| H | -0.54997200 | 2.68653900  | 0.00017400  |
| H | 1.72804300  | -0.90703400 | -0.00111000 |

### 190-radical

|   |             |             |             |
|---|-------------|-------------|-------------|
| C | 0.04431500  | 0.61235200  | -0.00004100 |
| N | 1.32566100  | 0.61473400  | 0.00003200  |
| C | -0.78005500 | 1.85434700  | 0.00001400  |
| N | -0.65518500 | -0.69981600 | -0.00023200 |
| O | 2.19634900  | -0.23136800 | 0.00001400  |
| O | -1.87982800 | -0.64075600 | 0.00009800  |



|   |             |             |             |
|---|-------------|-------------|-------------|
| O | 0.01916200  | -1.71633000 | 0.00006800  |
| H | -1.42397300 | 1.89218000  | 0.88109200  |
| H | -1.42389600 | 1.89234400  | -0.88111100 |
| H | -0.11648800 | 2.71849500  | 0.00013300  |

### Entry 191

|   |             |             |             |
|---|-------------|-------------|-------------|
| C | 0.05613400  | -0.48287600 | 0.00005100  |
| N | -0.91574000 | -1.34141300 | 0.00027600  |
| C | 1.40912900  | -1.04313400 | -0.00008900 |
| N | -0.16995000 | 0.98307400  | 0.00000100  |
| O | -2.20387900 | -0.99370800 | 0.00026400  |
| O | 0.78446700  | 1.73159200  | 0.00097000  |
| O | -1.35084200 | 1.37953200  | -0.00096400 |
| C | 2.60598700  | -0.44860000 | -0.00041800 |
| H | 1.35728700  | -2.12691100 | -0.00000200 |
| H | -2.26164900 | -0.00566400 | -0.00027600 |
| H | 3.49273000  | -1.07133600 | -0.00060000 |
| H | 2.74600000  | 0.62061900  | -0.00048400 |

### 191-radical

|   |             |             |             |
|---|-------------|-------------|-------------|
| C | -0.03548500 | -0.46227600 | -0.00002700 |
| N | 1.00133400  | -1.23655800 | -0.00005500 |
| C | -1.36431900 | -1.06079100 | 0.00007600  |
| N | 0.22627300  | 1.00599700  | -0.00009800 |
| O | 2.20002600  | -1.07261300 | -0.00010900 |
| O | -0.75546300 | 1.73619100  | -0.00022000 |
| O | 1.38961000  | 1.37278800  | 0.00033000  |
| C | -2.56790900 | -0.47923900 | 0.00007200  |
| H | -1.30209900 | -2.14470800 | 0.00019200  |
| H | -3.44958100 | -1.10860300 | 0.00020500  |
| H | -2.70867300 | 0.59013700  | -0.00005900 |

### Entry 192

|    |             |             |             |
|----|-------------|-------------|-------------|
| C  | -0.37032700 | -0.35981400 | 0.10938100  |
| N  | -1.06036500 | -1.40184100 | -0.16556000 |
| C  | 1.09849000  | -0.55527200 | 0.38690500  |
| N  | -0.88905500 | 1.01382000  | 0.22676900  |
| O  | -2.35892100 | -1.34002100 | -0.45886400 |
| O  | -0.18123800 | 1.84309300  | 0.75594200  |
| O  | -2.04036900 | 1.21239400  | -0.18748000 |
| O  | 1.54187300  | -1.23459100 | 1.24445800  |
| Cl | 2.13103000  | 0.27958200  | -0.80990200 |
| H  | -2.64130900 | -0.39322800 | -0.47028000 |

### 192-radical

|   |             |             |            |
|---|-------------|-------------|------------|
| C | -0.40642700 | -0.34067500 | 0.06094800 |
|---|-------------|-------------|------------|

|    |             |             |             |
|----|-------------|-------------|-------------|
| N  | -1.27372300 | -1.27322400 | -0.11761500 |
| C  | 1.02654800  | -0.73324400 | 0.19303600  |
| N  | -0.87852300 | 1.07011500  | 0.17468700  |
| O  | -2.46060700 | -1.32174700 | -0.28901500 |
| O  | -0.20372400 | 1.79513100  | 0.88336400  |
| O  | -1.90914300 | 1.35568700  | -0.40546000 |
| O  | 1.38054700  | -1.77541100 | 0.63410600  |
| Cl | 2.16990700  | 0.43741200  | -0.50043400 |

### Entry 193

|   |             |             |             |
|---|-------------|-------------|-------------|
| C | -0.08383400 | -0.46947400 | 0.05222500  |
| N | 0.87213000  | -1.32949900 | 0.12514400  |
| C | -1.46664300 | -1.03775600 | -0.00534900 |
| N | 0.13065400  | 0.99342400  | 0.01213000  |
| O | 2.15344900  | -0.98044600 | 0.08581500  |
| O | 1.23164700  | 1.37143000  | -0.42894600 |
| O | -0.73207100 | 1.71950300  | 0.44151100  |
| O | -2.46279300 | -0.41784800 | -0.25820000 |
| H | -1.45304600 | -2.12833800 | 0.17171400  |
| H | 2.21456200  | -0.01686000 | -0.13532800 |

### 193-radical

|   |             |             |             |
|---|-------------|-------------|-------------|
| C | 0.03901600  | -0.45046900 | -0.04406000 |
| N | -1.00465800 | -1.20329000 | -0.11010200 |
| C | 1.37486400  | -1.09407400 | 0.04083900  |
| N | -0.14608000 | 1.03191100  | -0.00436300 |
| O | -2.19425700 | -1.03295600 | -0.13985900 |
| O | -1.14653200 | 1.44625700  | 0.55594900  |
| O | 0.71735800  | 1.68588700  | -0.55411900 |
| O | 2.40627000  | -0.51681900 | 0.25054500  |
| H | 1.30917300  | -2.19203700 | -0.07954500 |

### Entry 194

|   |             |             |             |
|---|-------------|-------------|-------------|
| C | 0.43321600  | 0.20439300  | -0.01863800 |
| N | 0.72088900  | 1.44321200  | 0.04583100  |
| N | -0.85316700 | -0.31674000 | -0.16744400 |
| N | 1.45977200  | -0.88468800 | -0.02252700 |
| O | 2.05738600  | 1.68979200  | 0.12546400  |
| O | 1.53735500  | -1.53122200 | 1.00576600  |
| O | 2.11142300  | -1.02385300 | -1.03756300 |
| N | -1.77713000 | 0.46299600  | 0.17810000  |
| C | -3.02579200 | -0.01112700 | -0.02122500 |
| N | -4.15228200 | -0.26077100 | -0.12650300 |
| H | 2.11955900  | 2.65460600  | 0.13764400  |

### 194-radical

|   |             |             |             |
|---|-------------|-------------|-------------|
| C | -0.45982000 | 0.13235700  | -0.00005600 |
| N | -0.75346300 | 1.39793700  | -0.00007400 |
| N | 0.81833000  | -0.37168100 | -0.00007700 |
| N | -1.56491000 | -0.88413900 | 0.00002000  |
| O | -1.77158900 | 2.02607900  | -0.00002800 |
| O | -1.23277700 | -2.05017100 | -0.00011200 |
| O | -2.69832500 | -0.43425800 | 0.00019400  |
| N | 1.73162900  | 0.49997200  | 0.00002900  |
| C | 2.98783600  | 0.01117600  | 0.00001400  |
| N | 4.11890500  | -0.24128900 | 0.00007600  |

### Entry 195

|    |             |             |             |
|----|-------------|-------------|-------------|
| C  | -0.56313300 | 0.64810800  | -0.00897200 |
| N  | -1.85155600 | 0.52983300  | 0.08106600  |
| N  | -0.03382200 | 1.92682600  | -0.14117000 |
| C  | 0.35075600  | -0.52119500 | -0.04258600 |
| O  | -2.45133200 | -0.68979800 | 0.04342700  |
| O  | -0.00823200 | -1.66367800 | -0.08173100 |
| Cl | 2.10860900  | -0.14694600 | 0.04266900  |
| H  | 0.81254300  | 2.11369400  | 0.37833200  |
| H  | -0.73612800 | 2.64715100  | -0.03210400 |
| H  | -1.77433700 | -1.39303400 | -0.03508900 |

### 195-radical

|    |             |             |             |
|----|-------------|-------------|-------------|
| C  | -0.58723400 | 0.60082200  | -0.00042700 |
| N  | -1.85776300 | 0.35008100  | 0.05766200  |
| N  | -0.12731800 | 1.90819500  | -0.11166800 |
| C  | 0.33404200  | -0.56207200 | -0.02334600 |
| O  | -2.50790800 | -0.68776200 | 0.01022200  |
| O  | 0.00941700  | -1.70139200 | -0.03408000 |
| Cl | 2.09110800  | -0.09702700 | 0.01702700  |
| H  | 0.70509500  | 2.11729300  | 0.42232200  |
| H  | -0.85128600 | 2.60496800  | -0.00024100 |

### Entry 196

|    |             |             |             |
|----|-------------|-------------|-------------|
| C  | -0.55829400 | 0.63383600  | 0.00007000  |
| N  | -1.84028800 | 0.52607800  | 0.00005000  |
| O  | -0.00789700 | 1.86768200  | -0.00004800 |
| C  | 0.38742700  | -0.50854900 | 0.00003400  |
| O  | -2.44335800 | -0.69131300 | -0.00003500 |
| O  | 0.01984700  | -1.65306500 | -0.00001500 |
| Cl | 2.10870600  | -0.10230500 | -0.00000200 |
| H  | -0.73032300 | 2.51231300  | -0.00006400 |
| H  | -1.75919600 | -1.39380900 | -0.00009500 |

### 196-radical

|    |             |             |             |
|----|-------------|-------------|-------------|
| C  | 0.58407400  | 0.58465000  | -0.00001100 |
| N  | 1.84960000  | 0.34787400  | -0.00001800 |
| O  | 0.10220000  | 1.84683700  | 0.00001300  |
| C  | -0.37475700 | -0.54898400 | 0.00005400  |
| O  | 2.50669400  | -0.68852800 | 0.00000800  |
| O  | -0.04741900 | -1.69117100 | -0.00001700 |
| Cl | -2.09014700 | -0.05057000 | -0.00000700 |
| H  | 0.83759500  | 2.47346100  | -0.00005000 |

#### Entry 197

|    |             |             |             |
|----|-------------|-------------|-------------|
| C  | 0.55881800  | 0.63074600  | 0.00027900  |
| N  | 1.83457300  | 0.56757600  | 0.00009200  |
| F  | 0.02728700  | 1.85537400  | -0.00014600 |
| C  | -0.37851000 | -0.50979500 | 0.00005000  |
| O  | 2.45500000  | -0.62876900 | -0.00011400 |
| O  | 0.00522500  | -1.64943400 | -0.00005300 |
| Cl | -2.09645700 | -0.10709700 | -0.00000300 |
| H  | 1.78852800  | -1.35082900 | 0.00008600  |

#### 197 radical

|    |             |             |             |
|----|-------------|-------------|-------------|
| C  | 0.58244500  | 0.56861400  | -0.00029600 |
| N  | 1.85031400  | 0.38075700  | -0.00011700 |
| F  | 0.14580200  | 1.82540300  | 0.00010900  |
| C  | -0.37797300 | -0.55501100 | 0.00000800  |
| O  | 2.54151200  | -0.61946800 | 0.00016700  |
| O  | -0.05022900 | -1.69706200 | -0.00003000 |
| Cl | -2.08361900 | -0.03784100 | 0.00002800  |

#### Entry 198

|    |             |             |             |
|----|-------------|-------------|-------------|
| C  | -0.55839500 | 0.63947600  | 0.00001500  |
| N  | -1.85171600 | 0.51299300  | -0.00000200 |
| C  | -0.02354200 | 2.04470500  | 0.00000400  |
| C  | 0.33369500  | -0.54140100 | 0.00004300  |
| O  | -2.43562100 | -0.69922000 | -0.00002200 |
| O  | -0.03127200 | -1.68704900 | 0.00001700  |
| Cl | 2.09509200  | -0.18583800 | -0.00001600 |
| H  | -0.86676600 | 2.73404700  | -0.00002600 |
| H  | 0.59293000  | 2.23587700  | -0.88142800 |
| H  | 0.59288800  | 2.23590400  | 0.88145900  |
| H  | -1.74900100 | -1.40404900 | -0.00005000 |

#### 198-radical

|   |             |             |             |
|---|-------------|-------------|-------------|
| C | -0.58216700 | 0.58869600  | 0.00000400  |
| N | -1.85267300 | 0.31894700  | -0.00000900 |
| C | -0.13729000 | 2.02206900  | 0.00000000  |
| C | 0.32440400  | -0.58441900 | 0.00002900  |

|    |             |             |             |
|----|-------------|-------------|-------------|
| O  | -2.50105700 | -0.70234700 | 0.00000000  |
| O  | 0.00048200  | -1.72549300 | -0.00000700 |
| Cl | 2.08371000  | -0.12543200 | -0.00000400 |
| H  | -1.01361000 | 2.67007100  | -0.00002100 |
| H  | 0.46709900  | 2.24713900  | -0.88130200 |
| H  | 0.46707000  | 2.24715600  | 0.88131800  |

### Entry 199

|    |             |             |             |
|----|-------------|-------------|-------------|
| C  | 0.58789600  | 0.04605500  | 0.10156900  |
| N  | 1.62171100  | -0.74976600 | 0.12264200  |
| C  | 0.85536600  | 1.49483100  | 0.19204800  |
| C  | -0.78989900 | -0.49062700 | -0.01336400 |
| O  | 1.48345800  | -2.07849000 | 0.00620600  |
| O  | -1.06176800 | -1.65840100 | -0.10899600 |
| Cl | -2.12597700 | 0.70769400  | -0.01733300 |
| C  | 1.99361000  | 2.06644300  | -0.20336500 |
| H  | 0.06180900  | 2.10244600  | 0.60848100  |
| H  | 0.53009700  | -2.31201200 | -0.08120100 |
| H  | 2.14526100  | 3.13219500  | -0.08424000 |
| H  | 2.79710800  | 1.48986700  | -0.64589600 |

### 199-radical

|    |             |             |             |
|----|-------------|-------------|-------------|
| C  | 0.56414400  | -0.02154700 | -0.06189100 |
| N  | 1.51517300  | 0.87322300  | -0.06357500 |
| C  | 0.90866600  | -1.44589800 | -0.12502300 |
| C  | -0.81661800 | 0.52828100  | 0.00940600  |
| O  | 1.53578200  | 2.07864300  | -0.00615100 |
| O  | -1.09911800 | 1.67907200  | 0.06112800  |
| Cl | -2.12451600 | -0.72974500 | 0.01656100  |
| C  | 2.12079800  | -1.94842900 | 0.12211400  |
| H  | 0.09475200  | -2.10640100 | -0.39238100 |
| H  | 2.30317300  | -3.01152600 | 0.03079200  |
| H  | 2.95738700  | -1.32514500 | 0.41762200  |

### Entry 200

|    |             |             |             |
|----|-------------|-------------|-------------|
| C  | 0.55331100  | 0.23623000  | 0.01854200  |
| N  | 1.82812400  | 0.37530000  | -0.02420000 |
| N  | -0.18443100 | 1.53195500  | 0.06634400  |
| C  | -0.18492000 | -1.04283200 | 0.03654300  |
| O  | 2.62432600  | -0.69362100 | 0.00500700  |
| O  | 0.39964900  | -2.08981900 | 0.13998300  |
| Cl | -1.92519800 | -0.98361800 | -0.20511400 |
| O  | -0.86380000 | 1.70024400  | 1.06609300  |
| O  | -0.04405100 | 2.29880700  | -0.86368700 |
| H  | 2.08316700  | -1.51455400 | 0.08225900  |

**200-radical**

|    |             |             |             |
|----|-------------|-------------|-------------|
| C  | 0.53680700  | -0.16791800 | 0.03415700  |
| N  | 1.55832200  | -0.94950400 | -0.06161900 |
| N  | 0.87538500  | 1.27107700  | 0.09129300  |
| C  | -0.84154500 | -0.73015900 | 0.11293000  |
| O  | 1.69831300  | -2.14033400 | -0.07472000 |
| O  | -1.03648700 | -1.87692700 | 0.35506900  |
| Cl | -2.15090700 | 0.38217100  | -0.31849100 |
| O  | 0.18202300  | 1.94916100  | 0.82987700  |
| O  | 1.82588900  | 1.64817000  | -0.56971500 |

**Entry 201**

|    |             |             |             |
|----|-------------|-------------|-------------|
| C  | -0.51558100 | 0.55126000  | -0.00003300 |
| N  | -1.81136200 | 0.72750100  | -0.00004700 |
| C  | 0.19901400  | 1.86971000  | -0.00004200 |
| C  | 0.09323500  | -0.80109100 | 0.00001500  |
| O  | -2.64901400 | -0.29830700 | 0.00000200  |
| O  | -0.58012800 | -1.80540200 | 0.00008300  |
| Cl | 1.84625200  | -0.93191200 | -0.00004700 |
| O  | 1.39033800  | 2.03732200  | 0.00011400  |
| H  | -0.52187400 | 2.70802300  | -0.00016700 |
| H  | -2.13445400 | -1.14620200 | 0.00005400  |

**201-radical**

|    |             |             |             |
|----|-------------|-------------|-------------|
| C  | 0.55528000  | 0.48500600  | 0.00001600  |
| N  | 1.86550800  | 0.46638800  | 0.00002800  |
| C  | -0.01429500 | 1.86031600  | 0.00000400  |
| C  | -0.11924200 | -0.84881500 | -0.00000700 |
| O  | 2.68246400  | -0.40896100 | 0.00002600  |
| O  | 0.47705400  | -1.87885100 | -0.00008700 |
| Cl | -1.89358900 | -0.80924200 | 0.00003900  |
| O  | -1.18207300 | 2.14826100  | -0.00006000 |
| H  | 0.78243000  | 2.62977000  | 0.00004100  |

**Entry 202**

|    |             |             |             |
|----|-------------|-------------|-------------|
| C  | 0.28671300  | -0.51016300 | -0.04773500 |
| N  | 0.32744300  | -1.81207200 | -0.08336000 |
| N  | -0.96035000 | 0.12890900  | -0.19502800 |
| C  | 1.49035300  | 0.35057500  | 0.01930100  |
| O  | 1.49166300  | -2.44678300 | -0.03853800 |
| O  | 2.60050700  | -0.10838700 | 0.11468900  |
| Cl | 1.23168000  | 2.09283000  | -0.01618800 |
| N  | -1.93571200 | -0.52364500 | 0.25065100  |
| C  | -3.14497600 | 0.04741700  | 0.04632400  |
| N  | -4.24546900 | 0.39709000  | -0.04465400 |
| H  | 2.23016800  | -1.79572100 | 0.06536900  |

**202-radical**

|    |             |             |             |
|----|-------------|-------------|-------------|
| C  | -0.26927800 | 0.48236200  | 0.00012600  |
| N  | -0.29257600 | 1.80269600  | 0.00039400  |
| N  | 0.92402800  | -0.21162300 | -0.00014300 |
| C  | -1.57890700 | -0.23375900 | -0.00019700 |
| O  | -1.19623100 | 2.58187300  | 0.00003100  |
| O  | -2.62685800 | 0.32658000  | -0.00057900 |
| Cl | -1.45265600 | -2.00533200 | 0.00021800  |
| N  | 1.96461400  | 0.50269600  | 0.00039500  |
| C  | 3.12800300  | -0.17784100 | -0.00038900 |
| N  | 4.20407000  | -0.60827700 | -0.00015500 |

**Entry 203**

|   |             |             |             |
|---|-------------|-------------|-------------|
| C | 0.60791500  | -0.04659100 | 0.01262500  |
| N | 0.08031000  | -1.22936800 | 0.03924700  |
| N | 2.00346900  | 0.05815600  | -0.08876300 |
| C | -0.13910700 | 1.22725600  | -0.02500200 |
| O | -1.27879100 | -1.34585900 | -0.01284900 |
| O | -1.35617200 | 1.29453600  | 0.01516500  |
| H | 2.43316800  | 0.68065700  | 0.58491300  |
| H | 2.45308000  | -0.84956100 | -0.08130800 |
| H | 0.47487700  | 2.14377400  | -0.09509100 |
| H | -1.68072800 | -0.44979100 | -0.00617000 |

**203-radical**

|   |             |             |             |
|---|-------------|-------------|-------------|
| C | -0.58089700 | -0.00407900 | 0.01221600  |
| N | -0.02219100 | 1.16676100  | 0.05337600  |
| N | -1.97274200 | -0.14567900 | -0.07765800 |
| C | 0.26567400  | -1.21929400 | -0.04290300 |
| O | 1.15634000  | 1.49573700  | -0.02439700 |
| O | 1.47009900  | -1.20915800 | 0.02962700  |
| H | -2.38890900 | -0.67683300 | 0.67841000  |
| H | -2.45610500 | 0.73458600  | -0.20090600 |
| H | -0.31063400 | -2.15772300 | -0.16525300 |

**Entry 204**

|   |             |             |             |
|---|-------------|-------------|-------------|
| C | 0.61369200  | -0.01664800 | -0.00012400 |
| N | 0.14961200  | -1.21583900 | -0.00003700 |
| O | 1.95970900  | 0.17265800  | 0.00003100  |
| C | -0.15824000 | 1.24125800  | -0.00000100 |
| O | -1.20273100 | -1.40096100 | 0.00004700  |
| O | -1.37680200 | 1.25481500  | 0.00001400  |
| H | 2.38809800  | -0.69502100 | 0.00022500  |
| H | 0.43563900  | 2.17004200  | 0.00007900  |
| H | -1.64514700 | -0.52390400 | -0.00002800 |

**204-radical**

|   |             |             |             |
|---|-------------|-------------|-------------|
| C | -0.57933400 | -0.04104500 | -0.00003000 |
| N | -0.12237700 | 1.16265800  | -0.00001400 |
| O | -1.91263400 | -0.30299000 | 0.00000200  |
| C | 0.31214500  | -1.22288000 | -0.00001100 |
| O | 1.03491500  | 1.58294800  | 0.00001500  |
| O | 1.51508100  | -1.14135300 | 0.00000400  |
| H | -2.41111600 | 0.52385800  | 0.00008900  |
| H | -0.22800700 | -2.18775200 | 0.00008100  |

**Entry 205**

|   |              |             |             |
|---|--------------|-------------|-------------|
| C | -0.60551300  | -0.07455900 | 0.00001700  |
| N | -0.071115100 | -1.23546300 | 0.00002500  |
| F | -1.95031700  | -0.03381300 | -0.00001400 |
| C | 0.04866500   | 1.24012000  | -0.00000100 |
| O | 1.27987900   | -1.31455900 | -0.00001400 |
| O | 1.26361000   | 1.34555100  | 0.00000900  |
| H | -0.61764200  | 2.11799100  | -0.00002100 |
| H | 1.66172100   | -0.40673900 | -0.00008400 |

**205-radical**

|   |             |             |             |
|---|-------------|-------------|-------------|
| C | 0.57110000  | 0.01454600  | 0.00000700  |
| N | 0.09717200  | -1.17712000 | 0.00001400  |
| F | 1.90330300  | 0.15833300  | 0.00000200  |
| C | -0.24956000 | 1.24011900  | -0.00003100 |
| O | -1.05501100 | -1.57757000 | -0.00001500 |
| O | -1.45497000 | 1.21654500  | 0.00002100  |
| H | 0.34068200  | 2.17505200  | -0.00002300 |

**Entry 206**

|    |             |             |             |
|----|-------------|-------------|-------------|
| C  | -0.20366600 | -0.06591700 | 0.00070100  |
| N  | 0.33869800  | -1.23239400 | 0.00021100  |
| Cl | -1.95261600 | -0.00489100 | -0.00018500 |
| C  | 0.49210800  | 1.23519500  | 0.00018600  |
| O  | 1.68653800  | -1.31429100 | -0.00024700 |
| O  | 1.70919100  | 1.31002800  | -0.00019300 |
| H  | -0.14403300 | 2.13423000  | 0.00002800  |
| H  | 2.07112600  | -0.40588700 | -0.00016900 |

**206-radical**

|    |             |             |             |
|----|-------------|-------------|-------------|
| C  | -0.17634000 | -0.03086000 | 0.00021100  |
| N  | 0.42301900  | -1.17241300 | 0.00011400  |
| Cl | -1.91418400 | 0.01341200  | -0.00004200 |
| C  | 0.58705900  | 1.24279600  | -0.00002400 |
| O  | 1.60413100  | -1.45707800 | -0.00013500 |



|   |             |            |             |
|---|-------------|------------|-------------|
| O | 1.79076400  | 1.27670000 | 0.00002300  |
| H | -0.04348700 | 2.15029300 | -0.00030100 |

### Entry 207

|   |             |             |             |
|---|-------------|-------------|-------------|
| C | 0.59071700  | -0.04106300 | 0.00009700  |
| N | 0.05313500  | -1.22406600 | 0.00000900  |
| C | 2.09478800  | 0.03185900  | 0.00002600  |
| C | -0.17918900 | 1.21303500  | -0.00019700 |
| O | -1.29397000 | -1.33175300 | -0.00008800 |
| O | -1.40234300 | 1.26711300  | 0.00017700  |
| H | 2.46647100  | 0.56018000  | 0.88356900  |
| H | 2.46653200  | 0.56145800  | -0.88271500 |
| H | 2.50766200  | -0.97597800 | -0.00064600 |
| H | 0.41398300  | 2.14583600  | -0.00054400 |
| H | -1.69399100 | -0.42890400 | 0.00000800  |

### 207-radical

|   |             |             |             |
|---|-------------|-------------|-------------|
| C | -0.56465100 | 0.00773700  | 0.00001600  |
| N | 0.03706600  | 1.15934300  | 0.00004600  |
| C | -2.06459400 | -0.06281700 | 0.00001100  |
| C | 0.27159300  | -1.21272900 | -0.00009000 |
| O | 1.21485000  | 1.45615500  | -0.00005600 |
| O | 1.47984100  | -1.21983200 | 0.00008000  |
| H | -2.43516900 | -0.59083300 | 0.88377100  |
| H | -2.43509400 | -0.59275400 | -0.88262400 |
| H | -2.48912400 | 0.94074500  | -0.00109300 |
| H | -0.31168800 | -2.15628800 | -0.00019300 |

### Entry 208

|   |             |             |             |
|---|-------------|-------------|-------------|
| C | 0.04018100  | -0.04248800 | -0.00013800 |
| N | 0.55366400  | -1.22653600 | 0.00043200  |
| N | -1.44952000 | -0.00717100 | -0.00009800 |
| C | 0.76919200  | 1.23673500  | -0.00078900 |
| O | 1.87653300  | -1.34052800 | 0.00085800  |
| O | 1.99230000  | 1.23816500  | -0.00066200 |
| O | -2.06322200 | -1.05060600 | -0.00147600 |
| O | -1.93731400 | 1.12075700  | 0.00174200  |
| H | 0.18224700  | 2.16193400  | -0.00113700 |
| H | 2.28614400  | -0.43376000 | 0.00067100  |

### 208-radical

|   |             |             |             |
|---|-------------|-------------|-------------|
| C | -0.06675000 | -0.00589300 | -0.00007300 |
| N | -0.61852400 | -1.17845400 | -0.00009900 |
| N | 1.39916600  | 0.01894800  | -0.00030000 |
| C | -0.86962900 | 1.24404300  | 0.00010600  |
| O | -1.77485600 | -1.49713400 | -0.00007100 |

|   |             |             |             |
|---|-------------|-------------|-------------|
| O | -2.07406600 | 1.21358600  | 0.00013900  |
| O | 1.99999600  | -1.03922700 | 0.00034500  |
| O | 1.90295600  | 1.13719500  | -0.00007900 |
| H | -0.27846200 | 2.17228000  | -0.00008400 |

### Entry 209

|    |             |             |             |
|----|-------------|-------------|-------------|
| C  | -0.40695600 | -0.17525400 | 0.04372300  |
| N  | -1.25610300 | -1.15500700 | -0.14504200 |
| C  | 1.00866200  | -0.64481500 | 0.10997000  |
| C  | -0.79938100 | 1.23554300  | 0.20382700  |
| O  | -2.54451200 | -0.87050000 | -0.23214100 |
| O  | -1.97392500 | 1.58002300  | 0.14513100  |
| O  | 1.38704700  | -1.74490900 | 0.30439400  |
| Cl | 2.21855300  | 0.69357500  | -0.18511100 |
| H  | -0.00910800 | 1.97141700  | 0.39655100  |
| H  | -2.67640200 | 0.11310200  | -0.11857400 |

### 209-radical

|    |             |             |             |
|----|-------------|-------------|-------------|
| C  | 0.42038800  | 0.13367300  | -0.00002900 |
| N  | 1.35450200  | 1.05785500  | 0.00017900  |
| C  | -0.96323400 | 0.64689600  | -0.00014800 |
| C  | 0.86015700  | -1.28960100 | -0.00024800 |
| O  | 2.54593800  | 0.95171900  | 0.00029200  |
| O  | 2.02479300  | -1.60181000 | -0.00016800 |
| O  | -1.29710100 | 1.78332500  | -0.00037800 |
| Cl | -2.21310900 | -0.66962500 | 0.00022200  |
| H  | 0.04843200  | -2.03304100 | -0.00044200 |

### Entry 210

|   |             |             |             |
|---|-------------|-------------|-------------|
| C | 0.58378100  | -0.21823200 | 0.00002900  |
| N | 1.38011900  | -1.26228900 | 0.00001300  |
| N | -0.76243600 | -0.60376100 | 0.00006300  |
| C | 1.03717700  | 1.19061400  | 0.00004200  |
| O | 2.68474700  | -1.05354100 | -0.00004100 |
| O | 2.22780800  | 1.47124000  | -0.00005600 |
| N | -1.57145800 | 0.36532600  | 0.00007600  |
| C | -2.87886900 | 0.02339800  | -0.00004100 |
| N | -4.03039100 | -0.10095500 | -0.00007100 |
| H | 0.26477900  | 1.96947300  | 0.00009000  |
| H | 2.87140900  | -0.07400200 | -0.00005900 |

### 210-radical

|   |             |             |             |
|---|-------------|-------------|-------------|
| C | 0.60417300  | -0.19137900 | -0.00020500 |
| N | 1.46754000  | -1.19004300 | 0.00004800  |
| N | -0.71885900 | -0.58204200 | -0.00056000 |
| C | 1.12905000  | 1.20885600  | -0.00012800 |

|   |             |             |             |
|---|-------------|-------------|-------------|
| O | 2.66375900  | -1.15463700 | 0.00026900  |
| O | 2.30875500  | 1.45003200  | 0.00036000  |
| N | -1.54121500 | 0.38163300  | -0.00069400 |
| C | -2.84126900 | 0.02201400  | 0.00015100  |
| N | -3.99092700 | -0.12226700 | 0.00067700  |
| H | 0.35239500  | 1.98892300  | -0.00023900 |

### Entry 211

|   |             |             |             |
|---|-------------|-------------|-------------|
| C | 0.99170000  | 0.43617900  | -0.00850700 |
| N | 2.13578900  | -0.17583600 | 0.03444200  |
| N | -0.20386600 | -0.29774300 | -0.03299500 |
| N | -1.22667100 | 0.44581400  | 0.01178600  |
| N | 0.96638100  | 1.80865300  | -0.07411000 |
| O | 2.05060700  | -1.54827800 | -0.00561700 |
| C | -2.41231500 | -0.19992800 | 0.00504900  |
| N | -3.49964700 | -0.60036400 | 0.00722000  |
| H | 0.11306300  | 2.24734600  | 0.23935500  |
| H | 1.82617700  | 2.27595600  | 0.16937400  |
| H | 2.97569600  | -1.81825300 | 0.03255100  |

### 211-radical

|   |             |             |             |
|---|-------------|-------------|-------------|
| C | 0.99291100  | 0.37760500  | -0.00806300 |
| N | 2.10426100  | -0.32750300 | 0.00399200  |
| N | -0.18733100 | -0.33241100 | -0.01861300 |
| N | -1.20919100 | 0.43817500  | 0.00903400  |
| N | 1.04694200  | 1.74782200  | -0.06816300 |
| O | 2.31404700  | -1.52580000 | 0.01029300  |
| C | -2.39850100 | -0.18449000 | 0.00395600  |
| N | -3.49047700 | -0.57652100 | 0.00451800  |
| H | 0.17989100  | 2.20938200  | 0.16944400  |
| H | 1.89185100  | 2.19139000  | 0.25748200  |

### Entry 212

|   |             |             |             |
|---|-------------|-------------|-------------|
| C | -1.01970200 | 0.42919800  | -0.00002100 |
| N | -2.11711400 | -0.25989200 | -0.00001000 |
| O | -1.06288500 | 1.76890800  | -0.00000500 |
| N | 0.19901700  | -0.22094600 | 0.00000300  |
| O | -2.02445100 | -1.61170700 | 0.00000900  |
| N | 1.21676500  | 0.52997600  | 0.00003600  |
| C | 2.39935700  | -0.11684800 | 0.00000200  |
| N | 3.48553500  | -0.52251100 | -0.00002000 |
| H | -1.99111900 | 2.04302100  | 0.00001600  |
| H | -1.07755300 | -1.86111900 | 0.00000800  |

### 212-radical

|   |             |            |            |
|---|-------------|------------|------------|
| C | -0.98704100 | 0.37857200 | 0.00001600 |
|---|-------------|------------|------------|

|   |             |             |             |
|---|-------------|-------------|-------------|
| N | -2.08429800 | -0.32023000 | 0.00003300  |
| O | -1.02571100 | 1.72172400  | 0.00003000  |
| N | 0.21441700  | -0.29825500 | -0.00007200 |
| O | -2.30512000 | -1.52021000 | 0.00000200  |
| N | 1.22548600  | 0.46883400  | -0.00010800 |
| C | 2.41372900  | -0.16365900 | 0.00000700  |
| N | 3.50566800  | -0.55437000 | 0.00008000  |
| H | -1.94238200 | 2.02655500  | 0.00008100  |

#### Entry 214

|    |             |             |             |
|----|-------------|-------------|-------------|
| C  | -0.86892400 | 0.00520800  | 0.00003800  |
| N  | -1.89731000 | 0.77781800  | 0.00001100  |
| N  | 0.42997200  | 0.50316900  | -0.00000300 |
| O  | -1.60388900 | 2.10989500  | -0.00000900 |
| N  | 1.33563200  | -0.37113200 | -0.00002900 |
| Cl | -1.19018600 | -1.70555200 | -0.00000300 |
| C  | 2.59617900  | 0.11266300  | -0.00000300 |
| N  | 3.72847200  | 0.35918100  | 0.00001500  |
| H  | -2.47661700 | 2.52474000  | -0.00004000 |

#### 214-radical

|    |             |             |             |
|----|-------------|-------------|-------------|
| C  | -0.85117200 | 0.05053900  | -0.00014100 |
| N  | -1.81894700 | 0.91809400  | -0.00011500 |
| N  | 0.44340100  | 0.52565000  | 0.00019400  |
| O  | -1.85379400 | 2.12424200  | 0.00002400  |
| N  | 1.33768900  | -0.36721600 | 0.00042300  |
| Cl | -1.26978900 | -1.62951200 | -0.00005000 |
| C  | 2.60328300  | 0.09427600  | -0.00000600 |
| N  | 3.73844100  | 0.32902500  | -0.00028100 |

#### Entry 215

|   |             |             |             |
|---|-------------|-------------|-------------|
| C | -1.01658400 | -0.01036700 | -0.00002100 |
| N | -1.93896700 | -0.95129700 | 0.00000800  |
| C | -1.52479100 | 1.36329600  | -0.00006300 |
| C | -0.84002100 | 2.51128700  | 0.00003600  |
| N | 0.29283600  | -0.47004600 | -0.00002100 |
| N | 1.21533300  | 0.39496400  | 0.00004900  |
| O | -1.54357600 | -2.22706700 | 0.00002300  |
| C | 2.46795700  | -0.10822700 | 0.00000200  |
| N | 3.59424200  | -0.38250600 | -0.00003300 |
| H | -2.61023200 | 1.38522600  | -0.00012900 |
| H | -1.38260200 | 3.44943200  | 0.00003600  |
| H | 0.23792700  | 2.55772700  | 0.00011900  |
| H | -0.55996300 | -2.24958600 | 0.00004400  |

#### 215-radical

|   |             |             |             |
|---|-------------|-------------|-------------|
| C | -0.97994300 | -0.00557000 | 0.00000100  |
| N | -1.93526600 | -0.91801000 | -0.00001100 |
| C | -1.42490000 | 1.38794100  | -0.00001900 |
| C | -0.68299500 | 2.50054000  | 0.00000000  |
| N | 0.29668000  | -0.56154300 | 0.00002800  |
| N | 1.24194000  | 0.28201800  | 0.00004800  |
| O | -1.93592900 | -2.11996800 | -0.00000200 |
| C | 2.48001400  | -0.25392700 | -0.00000500 |
| N | 3.60041500  | -0.55139000 | -0.00003600 |
| H | -2.50740600 | 1.47439300  | -0.00005300 |
| H | -1.17998800 | 3.46346000  | -0.00002200 |
| H | 0.39538800  | 2.49045900  | 0.00003000  |

### Entry 216

|   |             |             |             |
|---|-------------|-------------|-------------|
| C | 0.73997900  | 0.27957400  | 0.00000400  |
| N | 1.76082300  | 1.04655000  | 0.00000400  |
| N | -0.58519000 | 0.68539500  | 0.00001000  |
| O | 1.47335200  | 2.37100000  | 0.00001200  |
| N | -1.40514800 | -0.27316200 | -0.00000500 |
| N | 1.07074400  | -1.18694800 | 0.00000200  |
| C | -2.70574200 | 0.08323900  | -0.00001300 |
| N | -3.85547000 | 0.22613900  | -0.00002500 |
| O | 1.17281400  | -1.71396000 | -1.09075200 |
| O | 1.17267500  | -1.71398600 | 1.09075800  |
| H | 2.34353700  | 2.79285300  | 0.00001400  |

### 216-radical

|   |             |             |             |
|---|-------------|-------------|-------------|
| C | 0.71017300  | 0.32459800  | 0.00004500  |
| N | 1.66567300  | 1.18897600  | 0.00004500  |
| N | -0.61400500 | 0.69813300  | 0.00008200  |
| O | 1.70105200  | 2.39339100  | 0.00008900  |
| N | -1.41713900 | -0.27866400 | 0.00004100  |
| N | 1.13069500  | -1.11472700 | 0.00000200  |
| C | -2.72208100 | 0.05313400  | -0.00009400 |
| N | -3.87399900 | 0.17943800  | -0.00019300 |
| O | 1.26446700  | -1.63270200 | -1.09132600 |
| O | 1.26359100  | -1.63300000 | 1.09129400  |

### Entry 217

|   |             |             |             |
|---|-------------|-------------|-------------|
| C | 0.45743000  | 0.69459300  | 0.12267100  |
| N | 1.21810500  | 1.71973100  | -0.02172000 |
| N | -0.92589300 | 0.73484200  | -0.07020900 |
| O | 0.57769200  | 2.86218900  | -0.37854000 |
| N | -1.47707700 | -0.37068200 | 0.19085900  |
| C | 1.16342000  | -0.57944900 | 0.54994000  |
| C | -2.81664000 | -0.40124300 | 0.02679200  |

|    |             |             |             |
|----|-------------|-------------|-------------|
| N  | -3.95637800 | -0.58767600 | -0.06480800 |
| O  | 1.48717000  | -0.84442900 | 1.65368800  |
| Cl | 1.49133300  | -1.67113700 | -0.83481100 |
| H  | 1.29187100  | 3.51034100  | -0.44466600 |

### 217-radical

|    |             |             |             |
|----|-------------|-------------|-------------|
| C  | 0.53602200  | 0.67731600  | 0.01837700  |
| N  | 1.22986800  | 1.77117400  | -0.15912200 |
| N  | -0.84690200 | 0.79591300  | -0.10119000 |
| O  | 0.93670400  | 2.89704500  | -0.44417600 |
| N  | -1.48392000 | -0.22730500 | 0.27293500  |
| C  | 1.35694800  | -0.53832100 | 0.35419300  |
| C  | -2.82575400 | -0.13447800 | 0.17481200  |
| N  | -3.98188300 | -0.20955700 | 0.15334300  |
| O  | 2.27380000  | -0.53043000 | 1.10481400  |
| Cl | 0.91132500  | -1.99244700 | -0.57242100 |

### Entry 218

|   |             |             |             |
|---|-------------|-------------|-------------|
| C | -0.98709100 | 0.09202600  | 0.03798300  |
| N | -2.04113100 | -0.64096300 | -0.05144600 |
| N | 0.28732200  | -0.42796000 | 0.32773500  |
| O | -1.78293700 | -1.97973100 | -0.01188500 |
| N | 1.20264500  | 0.08814700  | -0.36011300 |
| C | -1.25324500 | 1.56922300  | -0.02143300 |
| C | 2.45644100  | -0.32600200 | -0.04956600 |
| N | 3.57941900  | -0.57692300 | 0.07921000  |
| O | -0.40553000 | 2.41536000  | 0.06587700  |
| H | -2.65740700 | -2.38709800 | -0.06634600 |
| H | -2.32926300 | 1.79447200  | -0.13520500 |

### 218-radical

|   |             |             |             |
|---|-------------|-------------|-------------|
| C | 0.95604600  | 0.01057700  | 0.00567700  |
| N | 1.94050800  | -0.86014800 | 0.00792200  |
| N | -0.32679800 | -0.54632900 | -0.03942100 |
| O | 1.98813400  | -2.05656300 | -0.00642800 |
| N | -1.26245100 | 0.29239800  | 0.06256800  |
| C | 1.39994900  | 1.43613500  | 0.01249900  |
| C | -2.50364300 | -0.23560000 | 0.00794000  |
| N | -3.62539100 | -0.52562500 | -0.01873000 |
| O | 0.67444700  | 2.39242700  | -0.03031100 |
| H | 2.50415600  | 1.52435100  | 0.05084400  |

### Entry 219

|   |             |             |             |
|---|-------------|-------------|-------------|
| N | -0.04316600 | 0.56698700  | -0.15040400 |
| C | 1.16930700  | -0.23209400 | 0.00369000  |
| H | -0.07994800 | 1.24755400  | 0.60514200  |

|   |             |             |             |
|---|-------------|-------------|-------------|
| H | 1.23795000  | -0.94705800 | -0.81788500 |
| H | 2.02231000  | 0.44998900  | -0.05794400 |
| H | 1.20915800  | -0.77855400 | 0.95476600  |
| O | -1.17389400 | -0.29257100 | 0.12675700  |
| H | -1.71199300 | -0.20771500 | -0.66744300 |

### 219-radical

|   |             |             |             |
|---|-------------|-------------|-------------|
| N | -0.17798700 | 0.42577900  | -0.05500100 |
| O | -1.22483000 | -0.30073900 | 0.01473500  |
| C | 1.14739200  | -0.17094800 | 0.00920500  |
| H | -0.28237800 | 1.41823300  | 0.15533400  |
| H | 1.19828200  | -0.98793200 | -0.71206100 |
| H | 1.89146600  | 0.58781700  | -0.24173900 |
| H | 1.35282900  | -0.56697400 | 1.01036200  |

### Entry 220

|   |             |             |             |
|---|-------------|-------------|-------------|
| N | -0.04765100 | -0.04280200 | -0.45964800 |
| C | 1.28566300  | -0.31031600 | 0.07779900  |
| F | -0.36670000 | 1.28100000  | 0.10688200  |
| H | 1.95150900  | 0.46328300  | -0.29907600 |
| H | 1.27727300  | -0.31933200 | 1.17092600  |
| H | 1.59093100  | -1.28339000 | -0.30918000 |
| O | -0.90127800 | -0.91164900 | 0.19834800  |
| H | -1.68961300 | -0.93485400 | -0.36065100 |

### 220-radical

|   |             |             |             |
|---|-------------|-------------|-------------|
| N | 0.04748300  | 0.20295200  | -0.27886100 |
| O | 0.46403000  | 1.26722200  | 0.09734700  |
| C | -1.30812800 | -0.28184100 | 0.05368900  |
| F | 0.96165100  | -0.96836000 | 0.05250900  |
| H | -1.46907800 | -1.22061300 | -0.46761900 |
| H | -1.38025700 | -0.41690400 | 1.13465900  |
| H | -2.00137400 | 0.48535800  | -0.28850300 |

### Entry 221

|   |             |             |             |
|---|-------------|-------------|-------------|
| N | 0.04582000  | 0.00000100  | -0.42396500 |
| C | -1.33938500 | 0.00016400  | 0.04752000  |
| O | 0.63653900  | -1.14913100 | 0.19654200  |
| H | -1.82451900 | 0.89259500  | -0.34534600 |
| H | -1.82478800 | -0.89204600 | -0.34552100 |
| H | -1.38094500 | 0.00006100  | 1.14183700  |
| H | 1.27918300  | -1.45017200 | -0.45653500 |
| O | 0.63685400  | 1.14896500  | 0.19655500  |
| H | 1.27949500  | 1.44990500  | -0.45657300 |

### 221-radical

|   |             |             |             |
|---|-------------|-------------|-------------|
| N | 0.04486700  | 0.13144800  | -0.23406500 |
| O | 0.49057200  | 1.25501500  | 0.07324000  |
| C | -1.34626600 | -0.23784900 | 0.04675900  |
| O | 0.88654700  | -0.99738200 | 0.04617900  |
| H | -1.97092800 | 0.56579900  | -0.33668800 |
| H | -1.56702900 | -1.17569400 | -0.45877200 |
| H | -1.48490400 | -0.34704500 | 1.12650600  |
| H | 1.76943800  | -0.59716800 | 0.07150000  |

### Entry 222

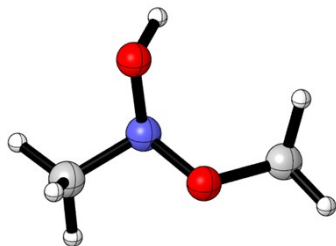

|   |            |            |            |
|---|------------|------------|------------|
| N | -0.4423206 | 0.2381129  | -0.2469962 |
| C | -1.6884276 | -0.5060931 | -0.0612882 |
| O | 0.5395054  | -0.5681981 | 0.3957068  |
| H | -2.4969346 | 0.0908859  | -0.4807772 |
| H | -1.5986766 | -1.4457241 | -0.6053252 |
| H | -1.8757606 | -0.7011121 | 0.9996908  |
| C | 1.8388384  | -0.2167251 | -0.0656172 |
| H | 2.1146934  | 0.7929089  | 0.2574748  |
| H | 2.5168434  | -0.9344241 | 0.3969098  |
| H | 1.8990694  | -0.2907681 | -1.1556952 |
| O | -0.5952146 | 1.4251499  | 0.5591438  |
| H | -0.2116156 | 2.1159869  | 0.0067728  |

### 222-radical

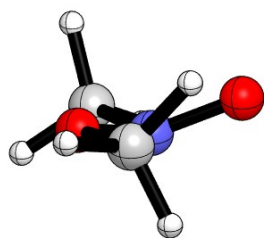

|   |            |            |            |
|---|------------|------------|------------|
| N | -0.4080893 | 0.4180214  | -0.3086141 |
| O | -0.0024673 | 1.5822654  | -0.1282531 |
| C | -1.8101343 | 0.0685514  | -0.0546541 |
| O | 0.4041987  | -0.6772796 | 0.1773729  |
| H | -2.4196613 | 0.7931714  | -0.5905341 |
| H | -1.9908923 | -0.9389636 | -0.4227021 |



|   |            |            |            |
|---|------------|------------|------------|
| H | -2.0138453 | 0.1229484  | 1.0188529  |
| C | 1.7981397  | -0.3793076 | 0.0886029  |
| H | 2.0583237  | 0.4882134  | 0.6968059  |
| H | 2.2892967  | -1.2724946 | 0.4729219  |
| H | 2.0951307  | -0.2051256 | -0.9497991 |

### Entry 223

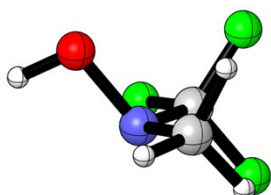

|   |            |            |            |
|---|------------|------------|------------|
| N | -0.1549105 | 0.2553985  | -0.4020044 |
| C | -1.0015835 | -0.8592275 | 0.0359686  |
| C | 1.2062085  | 0.1565755  | 0.0154736  |
| F | 1.3883685  | 0.0899725  | 1.3573456  |
| F | 1.9050245  | 1.2124425  | -0.4238674 |
| F | 1.7413295  | -0.9617145 | -0.5098024 |
| H | -1.1012655 | -0.8929435 | 1.1255666  |
| H | -1.9822005 | -0.7253625 | -0.4173464 |
| H | -0.5650575 | -1.7882415 | -0.3291564 |
| O | -0.6870005 | 1.4607245  | 0.1538526  |
| H | -0.7489125 | 2.0523765  | -0.6060304 |

### 223-radical

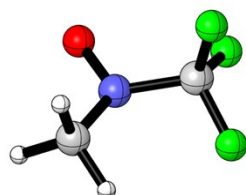

|   |            |            |            |
|---|------------|------------|------------|
| N | -0.2063609 | 0.5323510  | -0.1827653 |
| O | -0.5846879 | 1.7363020  | 0.0008537  |
| C | -1.1722059 | -0.5615470 | -0.0034723 |
| C | 1.2094621  | 0.2626350  | -0.0220893 |
| F | 1.5424341  | 0.1099800  | 1.2780277  |
| F | 1.9330961  | 1.2509460  | -0.5249413 |
| F | 1.5243471  | -0.8838840 | -0.6512653 |
| H | -1.3300989 | -0.7557030 | 1.0614137  |
| H | -2.1037909 | -0.2299220 | -0.4572853 |
| H | -0.8121949 | -1.4611580 | -0.4984763 |

### Entry 224

|   |            |             |            |
|---|------------|-------------|------------|
| N | 1.00904900 | 0.10958800  | 0.23846000 |
| C | 2.19769600 | -0.73437600 | 0.38672700 |

|   |             |             |             |
|---|-------------|-------------|-------------|
| O | 1.31059600  | 1.08924600  | -0.78334300 |
| N | -1.34475800 | -0.06930200 | 0.09373100  |
| O | -2.24098500 | -0.52424900 | -0.59343900 |
| O | -1.42769200 | 0.75175500  | 0.97601800  |
| N | -0.05741200 | -0.65701200 | -0.17238000 |
| H | 2.48816100  | -1.20934400 | -0.55909400 |
| H | 1.97370000  | -1.49510200 | 1.13332400  |
| H | 3.01261200  | -0.10333500 | 0.73631300  |
| H | 1.02451700  | 1.92088800  | -0.38328700 |
| H | -0.06867600 | -0.92378400 | -1.16017700 |

#### 224-radical

|   |             |             |             |
|---|-------------|-------------|-------------|
| N | 1.11177700  | -0.32248900 | -0.13478400 |
| C | 1.88686600  | 0.89256200  | -0.39617000 |
| O | 1.39731900  | -1.09596000 | 0.82726200  |
| N | -1.24920700 | 0.13607900  | 0.01982700  |
| O | -0.98866500 | 1.08637400  | 0.71815900  |
| O | -2.32425600 | -0.37087600 | -0.20612700 |
| N | -0.12877200 | -0.44398300 | -0.75793100 |
| H | 1.60282200  | 1.67605200  | 0.30978600  |
| H | 1.69005000  | 1.21827100  | -1.41587200 |
| H | 2.93791400  | 0.63857500  | -0.26875700 |
| H | -0.36374200 | -1.43183300 | -0.85228100 |

#### Entry 225

|   |             |             |             |
|---|-------------|-------------|-------------|
| N | 0.60362300  | 0.05383700  | -0.15814000 |
| C | 1.33674600  | 1.27590300  | 0.08220400  |
| O | 1.42964500  | -1.07282900 | -0.02335500 |
| C | -0.72592400 | -0.19707000 | -0.01684900 |
| O | -1.10646700 | -1.36510600 | 0.08206200  |
| C | -1.67486900 | 0.98051800  | -0.02572100 |
| H | 2.18639700  | 1.32183300  | -0.60132900 |
| H | 1.70569100  | 1.31645300  | 1.11292700  |
| H | 0.68660800  | 2.12747600  | -0.10709600 |
| H | 0.76331300  | -1.78847500 | 0.05587000  |
| H | -1.45754800 | 1.68336100  | -0.83213600 |
| H | -1.62868000 | 1.52102600  | 0.92423200  |
| H | -2.68228000 | 0.58883900  | -0.15294700 |

#### 225-radical

|   |             |             |             |
|---|-------------|-------------|-------------|
| N | -0.61099000 | 0.26415700  | -0.00004100 |
| C | -1.84626900 | -0.52985000 | -0.00000200 |
| O | -0.70037700 | 1.53446600  | 0.00002500  |
| C | 0.67030400  | -0.36367500 | -0.00001100 |
| O | 0.74622700  | -1.57352500 | 0.00001600  |
| C | 1.83898000  | 0.58287700  | -0.00000400 |

|   |             |             |             |
|---|-------------|-------------|-------------|
| H | -2.42318800 | -0.27332900 | -0.88977900 |
| H | -2.42260700 | -0.27427400 | 0.89043200  |
| H | -1.58843400 | -1.58534200 | -0.00061100 |
| H | 1.80661900  | 1.23359100  | 0.87630500  |
| H | 1.80654000  | 1.23373700  | -0.87619900 |
| H | 2.75310800  | -0.00711000 | -0.00008400 |

### Entry 226

|   |             |             |             |
|---|-------------|-------------|-------------|
| N | 0.43217400  | -0.04411700 | -0.34089300 |
| C | 0.60690900  | 1.35141400  | 0.03482000  |
| O | 1.46990000  | -0.83678500 | 0.26447500  |
| H | 1.62401800  | 1.65454500  | -0.21102400 |
| H | -0.08514900 | 1.95660100  | -0.55305800 |
| H | 0.42269300  | 1.52060600  | 1.10387700  |
| H | 2.03792200  | -1.07006000 | -0.47944100 |
| C | -0.80942100 | -0.63924600 | -0.09517800 |
| C | -1.97616200 | -0.01284600 | 0.09609000  |
| H | -0.75474200 | -1.72122600 | -0.12859300 |
| H | -2.88242000 | -0.59691600 | 0.18149400  |
| H | -2.07469000 | 1.06361200  | 0.14280100  |

### 226-radical

|   |             |             |             |
|---|-------------|-------------|-------------|
| N | 0.48061900  | -0.14262300 | -0.00000400 |
| C | 0.75163300  | 1.29697400  | 0.00000000  |
| O | 1.47347700  | -0.95226200 | 0.00000400  |
| H | 1.83172700  | 1.41204700  | -0.00004300 |
| H | 0.32349400  | 1.76399700  | -0.89120600 |
| H | 0.32356500  | 1.76398000  | 0.89124800  |
| C | -0.81300900 | -0.63759700 | -0.00000300 |
| C | -1.93467700 | 0.10629600  | 0.00000200  |
| H | -0.82885900 | -1.72027300 | -0.00000500 |
| H | -2.89746200 | -0.38539800 | 0.00000200  |
| H | -1.92829500 | 1.18807000  | 0.00000800  |

### Entry 227

|   |             |             |             |
|---|-------------|-------------|-------------|
| N | -0.31712000 | 0.03349300  | -0.32850000 |
| C | -1.12445600 | -1.12398300 | 0.07605100  |
| O | -0.88076200 | 1.23927300  | 0.20638600  |
| H | -2.11101700 | -1.02485800 | -0.37458400 |
| H | -0.63879000 | -2.02041700 | -0.31111600 |
| H | -1.21488200 | -1.18904900 | 1.16438300  |
| H | -1.06385100 | 1.76996800  | -0.57999100 |
| C | 1.00161600  | -0.03299600 | -0.06052800 |
| N | 2.14736000  | -0.10605900 | 0.09379700  |

### 227-radical

|   |             |             |             |
|---|-------------|-------------|-------------|
| N | -0.34317000 | 0.14359000  | -0.00008700 |
| C | -1.25600600 | -1.01133500 | 0.00002100  |
| O | -0.82025900 | 1.33144500  | 0.00003400  |
| H | -1.88077300 | -0.95848700 | -0.89240300 |
| H | -0.67062500 | -1.92973600 | -0.00085600 |
| H | -1.87953900 | -0.95942100 | 0.89337200  |
| C | 0.99303600  | -0.04137600 | -0.00001300 |
| N | 2.13900300  | -0.21325400 | 0.00002600  |

### Entry 228

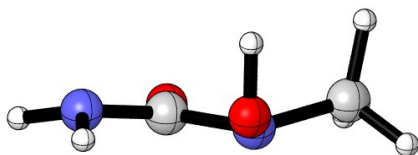

|   |            |            |            |
|---|------------|------------|------------|
| N | -0.3744081 | 0.0745685  | -0.3058488 |
| C | -1.4635301 | -0.8342365 | -0.0021597 |
| C | 0.9535379  | -0.3166755 | -0.1286367 |
| O | 1.2680719  | -1.4938675 | -0.0843467 |
| N | 1.8481769  | 0.7215235  | -0.0224827 |
| O | -0.6728321 | 1.4312955  | -0.0669157 |
| H | -1.1496451 | -1.8365765 | -0.2848777 |
| H | -1.7142791 | -0.8311795 | 1.0685132  |
| H | -2.3389211 | -0.5408245 | -0.5816328 |
| H | 1.5742059  | 1.6350015  | -0.3495098 |
| H | 2.8125709  | 0.4531015  | -0.1389477 |
| H | -0.7429481 | 1.5378695  | 0.8968453  |

### 228-radical

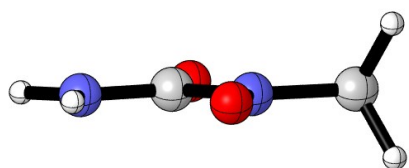

|   |            |            |            |
|---|------------|------------|------------|
| N | 0.4240521  | -0.3020832 | 0.0145795  |
| O | 0.5778161  | -1.5677922 | 0.0515115  |
| C | 1.6024601  | 0.5660498  | 0.0078395  |
| C | -0.9020129 | 0.2634088  | -0.0203785 |
| O | -1.0646759 | 1.4664328  | -0.0555665 |
| N | -1.8649629 | -0.6834512 | -0.0090345 |
| H | 1.2739721  | 1.6012208  | -0.0244485 |
| H | 2.1831141  | 0.3748438  | 0.9120015  |
| H | 2.2080721  | 0.3273178  | -0.8682315 |
| H | -1.6126449 | -1.6588102 | 0.0220585  |
| H | -2.8251899 | -0.3871372 | -0.0303305 |

**Entry 229**

|   |             |             |             |
|---|-------------|-------------|-------------|
| N | -0.83884600 | 0.02190400  | -0.42891700 |
| C | -1.98661300 | -0.68790300 | 0.14793700  |
| N | 0.32956500  | -0.67300400 | -0.03378600 |
| C | 1.46834500  | -0.24875900 | -0.00470500 |
| O | 2.59979500  | 0.02793600  | 0.07704100  |
| H | -1.94014000 | -0.70672200 | 1.24148900  |
| H | -1.97427400 | -1.70442000 | -0.24441600 |
| H | -2.88849300 | -0.17482100 | -0.18158600 |
| O | -0.82429900 | 1.32737200  | 0.18918700  |
| H | -0.72649500 | 1.92116900  | -0.56577900 |

**229-radical**

|   |             |             |             |
|---|-------------|-------------|-------------|
| N | -0.83227500 | 0.13259500  | -0.17480000 |
| C | -2.08352800 | -0.58898100 | 0.07166200  |
| O | -0.74831800 | 1.37100300  | 0.03808600  |
| N | 0.30531700  | -0.68659900 | -0.03528000 |
| C | 1.45061800  | -0.24893800 | 0.00068800  |
| O | 2.57806400  | 0.02513500  | 0.04332200  |
| H | -2.21753200 | -0.74832300 | 1.14623000  |
| H | -2.04562100 | -1.54630000 | -0.44499100 |
| H | -2.88864100 | 0.03107400  | -0.31604300 |

**Entry 230**

|   |             |             |             |
|---|-------------|-------------|-------------|
| N | -0.34111800 | -0.01197700 | 0.00017300  |
| C | -1.72132200 | -0.43420400 | -0.00002400 |
| O | -0.10981900 | 1.34386600  | -0.00001800 |
| H | -2.22340500 | -0.05720200 | -0.89325000 |
| H | -1.71602600 | -1.52267600 | 0.00014400  |
| H | -2.22374200 | -0.05693200 | 0.89289300  |
| H | 0.88178000  | 1.34490300  | -0.00032900 |
| O | 1.77104200  | -0.24576000 | 0.00005000  |
| N | 0.67248200  | -0.82912700 | -0.00011100 |

**230-radical**

|   |             |             |             |
|---|-------------|-------------|-------------|
| N | 0.36092200  | 0.12771300  | -0.00008800 |
| C | 1.64765600  | -0.57472400 | 0.00008800  |
| O | 0.27909700  | 1.35868100  | -0.00000400 |
| H | 2.20613200  | -0.28552900 | 0.89167800  |
| H | 1.44811700  | -1.64434800 | -0.00002400 |
| H | 2.20643000  | -0.28539800 | -0.89127200 |
| O | -1.83950800 | -0.11371500 | 0.00026200  |
| N | -0.82711100 | -0.74144300 | -0.00033700 |

**Entry 231**

|   |             |             |             |
|---|-------------|-------------|-------------|
| N | -0.59642000 | 0.07612400  | -0.38281100 |
| C | -1.44036200 | -1.01712100 | 0.10999500  |
| O | -1.07598400 | 1.27595600  | 0.14853200  |
| H | -2.43672800 | -0.83867300 | -0.28991300 |
| H | -1.05004200 | -1.95423400 | -0.27462600 |
| H | -1.47417800 | -1.03658000 | 1.20367300  |
| H | -0.77741500 | 1.95772500  | -0.46855900 |
| N | 0.81564900  | -0.08143400 | -0.02136900 |
| O | 1.44571000  | 0.94683500  | 0.09927400  |
| O | 1.23601500  | -1.22133300 | 0.00203400  |

### 231-radical

|   |             |             |             |
|---|-------------|-------------|-------------|
| N | -0.64831800 | 0.25341500  | -0.14140700 |
| C | -1.60169700 | -0.85179600 | 0.05231000  |
| O | -0.93190900 | 1.44271900  | 0.02218700  |
| H | -2.57236600 | -0.45593200 | -0.23809400 |
| H | -1.32034900 | -1.69329400 | -0.57470200 |
| H | -1.61442400 | -1.15874300 | 1.10126400  |
| N | 0.83995100  | -0.12136400 | -0.00722400 |
| O | 1.59348100  | 0.80810600  | 0.04669800  |
| O | 1.06041400  | -1.31402700 | -0.01412400 |

### Entry 232

|   |             |             |             |
|---|-------------|-------------|-------------|
| N | 1.59029300  | -0.13314900 | 0.34031600  |
| C | 2.29427600  | -1.02767700 | -0.58284800 |
| O | 2.20869900  | 1.15464400  | 0.21514400  |
| H | 3.33512200  | -1.10677300 | -0.26870900 |
| H | 1.83899400  | -2.01611400 | -0.53807000 |
| H | 2.25193500  | -0.65656900 | -1.61505600 |
| H | 2.53424000  | 1.33051200  | 1.10549900  |
| C | 0.17811400  | -0.04003900 | 0.15172100  |
| C | -0.59151700 | -1.20464400 | 0.29895500  |
| C | -0.46631400 | 1.17135700  | -0.11837000 |
| C | -1.97351000 | -1.15497100 | 0.15913300  |
| H | -0.11063400 | -2.14325600 | 0.54721100  |
| C | -1.85482000 | 1.20922100  | -0.24625600 |
| H | 0.12093100  | 2.07148800  | -0.22704600 |
| C | -2.61726900 | 0.05252300  | -0.11464100 |
| H | -2.55156500 | -2.06468100 | 0.27897700  |
| H | -2.33885400 | 2.15684200  | -0.45643000 |
| H | -3.69557200 | 0.08880100  | -0.21591200 |

### 232-radical

|   |             |             |             |
|---|-------------|-------------|-------------|
| N | -1.60614700 | 0.14677000  | 0.00002300  |
| C | -2.46217100 | -1.04288100 | 0.00000600  |
| O | -2.17643900 | 1.29123600  | -0.00003000 |

|   |             |             |             |
|---|-------------|-------------|-------------|
| H | -3.48636500 | -0.68114100 | 0.00016600  |
| H | -2.28289200 | -1.64973600 | -0.89177000 |
| H | -2.28268000 | -1.64991900 | 0.89161000  |
| C | -0.20214100 | 0.04847700  | 0.00001000  |
| C | 0.43935800  | -1.20138800 | -0.00000200 |
| C | 0.56418900  | 1.22599800  | 0.00001100  |
| C | 1.82976500  | -1.26257100 | -0.00000900 |
| H | -0.13247200 | -2.11955700 | -0.00001500 |
| C | 1.94899300  | 1.14399400  | 0.00000500  |
| H | 0.05088400  | 2.17726700  | 0.00001700  |
| C | 2.59242900  | -0.09637800 | -0.00000400 |
| H | 2.31710300  | -2.23087600 | -0.00002000 |
| H | 2.53393900  | 2.05677800  | 0.00000600  |
| H | 3.67449600  | -0.15160100 | -0.00001000 |

### Entry 233

|   |             |             |             |
|---|-------------|-------------|-------------|
| N | -0.98439900 | 0.07351600  | -0.44489500 |
| C | -1.78392700 | -1.07782700 | -0.00049500 |
| S | 0.68678500  | -0.01826200 | -0.13778000 |
| O | 1.16264400  | -1.26889900 | -0.66707100 |
| O | 1.26802300  | 1.26090500  | -0.43914600 |
| F | 0.75115400  | -0.17082800 | 1.49585400  |
| H | -1.30922500 | -1.98515100 | -0.36983100 |
| H | -1.87379500 | -1.10672600 | 1.08857500  |
| H | -2.76860300 | -0.97163300 | -0.45329400 |
| O | -1.52306100 | 1.25045900  | 0.12803700  |
| H | -1.46381400 | 1.90579700  | -0.58096600 |

### 233-radical

|   |             |             |             |
|---|-------------|-------------|-------------|
| N | -1.06157400 | -0.23916900 | 0.20596700  |
| O | -1.46626800 | -1.40511700 | -0.02199200 |
| C | -1.94825100 | 0.92453500  | -0.00072100 |
| S | 0.69020000  | 0.03241500  | 0.14559000  |
| O | 0.96288900  | 1.30716200  | 0.75722800  |
| O | 1.35834900  | -1.19374500 | 0.46082100  |
| F | 0.85936500  | 0.26405400  | -1.46741100 |
| H | -1.49209100 | 1.80762100  | 0.44027800  |
| H | -2.11934100 | 1.06999700  | -1.06987700 |
| H | -2.88528700 | 0.68782900  | 0.50096000  |

### Entry 234

|   |             |             |             |
|---|-------------|-------------|-------------|
| N | 0.98998200  | -0.01761600 | -0.44270100 |
| C | 1.96048900  | 0.98946700  | -0.00941900 |
| P | -0.64672600 | 0.19104000  | 0.00918600  |
| O | -1.10137600 | 1.58116000  | -0.15149700 |
| O | -0.80758900 | -0.42411700 | 1.48261100  |

|   |             |             |             |
|---|-------------|-------------|-------------|
| O | -1.40490600 | -0.92791100 | -0.88016900 |
| O | 1.41897000  | -1.32160300 | 0.01515800  |
| H | 1.55979300  | 1.96800300  | -0.27461800 |
| H | 2.14666700  | 0.95099800  | 1.06948200  |
| H | 2.89628400  | 0.82578000  | -0.54559900 |
| H | -0.31734400 | -1.25130900 | 1.59561600  |
| H | -1.63778900 | -0.60124600 | -1.75794400 |
| H | 1.51967400  | -1.83154200 | -0.79813300 |

### 234-radical

|   |             |             |             |
|---|-------------|-------------|-------------|
| N | -0.83227500 | 0.13259500  | -0.17480000 |
| C | -2.08352800 | -0.58898100 | 0.07166200  |
| O | -0.74831800 | 1.37100300  | 0.03808600  |
| N | 0.30531700  | -0.68659900 | -0.03528000 |
| C | 1.45061800  | -0.24893800 | 0.00068800  |
| O | 2.57806400  | 0.02513500  | 0.04332200  |
| H | -2.21753200 | -0.74832300 | 1.14623000  |
| H | -2.04562100 | -1.54630000 | -0.44499100 |
| H | -2.88864100 | 0.03107400  | -0.31604300 |

### Entry 235

|    |             |             |             |
|----|-------------|-------------|-------------|
| N  | -1.76196100 | -0.03349100 | 0.11306200  |
| C  | -2.62884300 | -1.12019600 | -0.34694000 |
| O  | -0.54955600 | -0.17769200 | -0.77077800 |
| C  | 0.59973900  | -0.03833200 | -0.07570400 |
| Cl | 1.90958500  | -0.15885400 | -1.28454900 |
| Cl | 0.70980600  | 1.58743600  | 0.76724400  |
| Cl | 0.81615800  | -1.32504800 | 1.18820200  |
| O  | -2.37378800 | 1.14570900  | -0.30585300 |
| H  | -2.12717800 | -2.06048000 | -0.12747100 |
| H  | -3.55147700 | -1.04694900 | 0.22854500  |
| H  | -2.84288200 | -1.03514500 | -1.41585500 |
| H  | -1.98770500 | 1.82398200  | 0.26701500  |

### 235-radical

|    |             |             |             |
|----|-------------|-------------|-------------|
| N  | -1.90444300 | -0.17840800 | 0.07190700  |
| O  | -2.37921800 | -1.25925100 | 0.28857900  |
| C  | -2.66504500 | 1.06710500  | 0.33483600  |
| O  | -0.48188700 | 0.07874300  | 0.87904000  |
| C  | 0.58934700  | 0.01262600  | 0.09451900  |
| Cl | 2.00853900  | 0.34656600  | 1.15261200  |
| Cl | 0.80633000  | -1.60961400 | -0.70239900 |
| Cl | 0.54997200  | 1.27454400  | -1.24949200 |
| H  | -2.85458500 | 1.14208200  | 1.40693900  |
| H  | -2.07475400 | 1.90521800  | -0.02091600 |
| H  | -3.59881300 | 0.97181000  | -0.21871000 |



**Entry 236**

|    |             |             |             |
|----|-------------|-------------|-------------|
| N  | 1.14034700  | -0.18662600 | -0.15395900 |
| O  | 2.01774400  | 0.00490300  | -1.06201200 |
| C  | 1.56143300  | -0.27040100 | 1.24559100  |
| C  | -0.22729000 | 0.01138800  | -0.52655100 |
| Cl | -1.27184700 | -1.36265500 | 0.00097600  |
| Cl | -0.89750700 | 1.57625600  | 0.12369500  |
| H  | 0.76123600  | -0.70109800 | 1.84548500  |
| H  | 2.44397700  | -0.90664100 | 1.28345300  |
| H  | 1.80864700  | 0.72704500  | 1.61822900  |
| H  | -0.26409100 | 0.07071600  | -1.60699800 |

**236-radical**

|    |             |             |             |
|----|-------------|-------------|-------------|
| N  | 0.90190900  | -0.72545400 | -0.26342700 |
| C  | 1.20143300  | -1.09996100 | 1.11457600  |
| C  | -0.24470800 | 0.02826300  | -0.54757000 |
| Cl | -1.73990100 | -0.84234800 | -0.12379400 |
| Cl | -0.25450700 | 1.72670100  | 0.31052200  |
| O  | 2.01751300  | -0.11672900 | -0.88209800 |
| H  | 1.41374800  | -0.22319400 | 1.73975700  |
| H  | 0.35013500  | -1.63986800 | 1.52704200  |
| H  | 2.06813900  | -1.75837100 | 1.09399900  |
| H  | -0.26717400 | 0.28725000  | -1.59838000 |
| H  | 2.14626500  | 0.74236500  | -0.43805400 |

**Entry 237**

|   |             |             |             |
|---|-------------|-------------|-------------|
| N | 0.62513300  | 0.27044400  | -0.40104200 |
| C | 1.75273000  | -0.65544400 | -0.29799000 |
| C | -0.64568100 | -0.36306000 | -0.34546300 |
| F | -0.91315000 | -0.98743300 | 0.85519100  |
| F | -1.62646300 | 0.56596400  | -0.51407900 |
| O | 0.72901700  | 1.21394000  | 0.67086300  |
| H | 1.80475600  | -1.13626800 | 0.68470900  |
| H | 1.64555100  | -1.41738700 | -1.07325400 |
| H | 2.67038800  | -0.09808100 | -0.48003100 |
| H | -0.71556800 | -1.11336200 | -1.13491700 |
| H | 0.60103700  | 2.06472100  | 0.23459300  |

**237-radical**

|   |             |             |             |
|---|-------------|-------------|-------------|
| N | -0.70933800 | -0.11383400 | -0.15823400 |
| O | -1.50810100 | -1.10655900 | -0.27241400 |
| C | -1.20708900 | 1.18005300  | 0.31349600  |
| C | 0.69700800  | -0.40216700 | -0.16441000 |
| F | 1.36203400  | 0.52483700  | -0.91206800 |
| F | 1.21994000  | -0.31351600 | 1.09928000  |

|   |             |             |             |
|---|-------------|-------------|-------------|
| H | -0.45994600 | 1.94777600  | 0.11496000  |
| H | -2.12322900 | 1.40084300  | -0.23231100 |
| H | -1.41855100 | 1.13449400  | 1.38514400  |
| H | 0.85462200  | -1.40301000 | -0.56025800 |

### Entry 238

|   |             |             |             |
|---|-------------|-------------|-------------|
| N | 0.74924800  | 0.16327200  | -0.49124500 |
| C | 1.77562900  | -0.81067100 | -0.11891300 |
| O | 1.13017100  | 1.46243000  | -0.06051900 |
| C | -0.57692500 | -0.11326200 | -0.02079300 |
| F | -0.88736500 | -1.38545200 | -0.42079500 |
| F | -0.59706900 | -0.16479800 | 1.38747500  |
| C | -1.63076600 | 0.85672700  | -0.48650100 |
| H | 1.92748300  | -0.86827400 | 0.96792800  |
| H | 2.70343200  | -0.50706100 | -0.60159500 |
| H | 1.48203800  | -1.79081500 | -0.49156100 |
| H | 1.20961800  | 1.42419500  | 0.90894000  |
| H | -1.67406000 | 0.83895300  | -1.57540100 |
| H | -1.38973300 | 1.86453300  | -0.15468200 |
| H | -2.59260800 | 0.55161100  | -0.07364600 |

### 238-radical

|   |             |             |             |
|---|-------------|-------------|-------------|
| N | 0.80877300  | 0.30876200  | -0.11895400 |
| C | 1.88096600  | -0.68744700 | -0.03011000 |
| O | 1.09147100  | 1.54515100  | 0.02487100  |
| C | -0.57621000 | -0.11340600 | -0.00522900 |
| F | -0.79655000 | -1.06956100 | -0.97127200 |
| F | -0.72917500 | -0.78973600 | 1.19206000  |
| C | -1.57777300 | 0.99991900  | -0.11366500 |
| H | 2.21483300  | -0.78546300 | 1.00629000  |
| H | 2.70600200  | -0.33762500 | -0.64913200 |
| H | 1.51947900  | -1.64722100 | -0.39501800 |
| H | -1.46191400 | 1.51170400  | -1.06814200 |
| H | -1.42894500 | 1.71545000  | 0.69253800  |
| H | -2.57300900 | 0.55988800  | -0.04588600 |

### Entry 239

|   |             |             |             |
|---|-------------|-------------|-------------|
| N | 1.05871600  | 0.07512900  | -0.31928300 |
| C | 2.20289200  | -0.82146200 | -0.51958400 |
| S | 0.02756700  | -0.45804800 | 0.99851000  |
| C | -1.55884100 | -0.11236900 | 0.19111700  |
| F | -1.64703200 | 1.19472100  | -0.20908600 |
| F | -1.76567300 | -0.86884700 | -0.92248200 |
| O | 1.61316900  | 1.36839400  | -0.03205700 |
| H | 1.81698600  | -1.81818600 | -0.73076400 |
| H | 2.75749000  | -0.45430500 | -1.38347900 |

|   |             |             |             |
|---|-------------|-------------|-------------|
| H | 2.87375600  | -0.85585200 | 0.34726000  |
| H | -2.35503500 | -0.31530400 | 0.91108300  |
| H | 0.99940800  | 1.96948500  | -0.47390400 |

### 239-radical

|   |             |             |             |
|---|-------------|-------------|-------------|
| N | 1.35071500  | 0.21680300  | 0.09453400  |
| O | 1.46846100  | 1.02678600  | 1.05168100  |
| C | 2.55214200  | -0.20420500 | -0.64113400 |
| S | -0.00651500 | -0.96823200 | 0.09618200  |
| C | -1.31249000 | 0.31611300  | 0.09542400  |
| F | -1.54429300 | 0.80638200  | -1.15260400 |
| F | -2.45995500 | -0.26920300 | 0.52519800  |
| H | 2.25161100  | -0.64399100 | -1.59079200 |
| H | 3.15469800  | 0.68890800  | -0.80332400 |
| H | 3.12614600  | -0.92796600 | -0.05365600 |
| H | -1.03059000 | 1.13679300  | 0.75458600  |

### Entry 240

|   |             |             |             |
|---|-------------|-------------|-------------|
| N | 1.05871600  | 0.07512900  | -0.31928300 |
| C | 2.20289200  | -0.82146200 | -0.51958400 |
| S | 0.02756700  | -0.45804800 | 0.99851000  |
| C | -1.55884100 | -0.11236900 | 0.19111700  |
| F | -1.64703200 | 1.19472100  | -0.20908600 |
| F | -1.76567300 | -0.86884700 | -0.92248200 |
| O | 1.61316900  | 1.36839400  | -0.03205700 |
| H | 1.81698600  | -1.81818600 | -0.73076400 |
| H | 2.75749000  | -0.45430500 | -1.38347900 |
| H | 2.87375600  | -0.85585200 | 0.34726000  |
| H | -2.35503500 | -0.31530400 | 0.91108300  |
| H | 0.99940800  | 1.96948500  | -0.47390400 |

### 240-radical

|   |             |             |             |
|---|-------------|-------------|-------------|
| N | 1.34283700  | 0.12992500  | -0.13154900 |
| O | 1.27574900  | 1.37719800  | 0.02759500  |
| C | 2.60298000  | -0.59102600 | 0.06208300  |
| N | 0.21431600  | -0.66416600 | -0.03550400 |
| C | -0.95302400 | -0.29932100 | -0.01176800 |
| S | -2.48280300 | 0.02093600  | 0.02039400  |
| H | 2.80130000  | -0.71522400 | 1.13110600  |
| H | 2.52904500  | -1.56465400 | -0.41881100 |
| H | 3.38870700  | 0.00908500  | -0.39187800 |

### Entry 241

|   |             |            |             |
|---|-------------|------------|-------------|
| N | -0.35807300 | 0.00480200 | -0.39506500 |
| O | -0.99791400 | 1.10460200 | 0.22919600  |
| C | 0.96747800  | 0.04039500 | -0.07916600 |

|   |             |             |             |
|---|-------------|-------------|-------------|
| N | 2.10822800  | 0.04683200  | 0.10463200  |
| H | -1.61819000 | 1.41268800  | -0.44638200 |
| O | -0.95042900 | -1.20011600 | 0.01701700  |
| H | -0.85102000 | -1.25237700 | 0.98470000  |

#### 241-radical

|   |             |             |             |
|---|-------------|-------------|-------------|
| N | -0.36133900 | 0.11534800  | -0.00013100 |
| O | -0.99433800 | 1.19074000  | -0.00009700 |
| O | -1.03662000 | -1.11573200 | -0.00048600 |
| C | 0.97301500  | -0.00645800 | 0.00017800  |
| N | 2.12996100  | -0.07485700 | 0.00009500  |
| H | -1.97077400 | -0.84475500 | 0.00384800  |

#### Entry 242

|   |             |             |             |
|---|-------------|-------------|-------------|
| N | 0.36631400  | -0.03414000 | 0.42175700  |
| F | 0.88226500  | 1.20435900  | -0.12837100 |
| C | -0.95563000 | -0.05565800 | 0.06661000  |
| N | -2.09635100 | -0.07374400 | -0.10499400 |
| O | 1.02007500  | -1.05780100 | -0.22939800 |
| H | 1.74305300  | -1.28768900 | 0.37352500  |

#### 242-radical

|   |             |             |             |
|---|-------------|-------------|-------------|
| N | 0.39216000  | -0.15935200 | 0.16606700  |
| O | 1.07541900  | -1.13417400 | -0.06905800 |
| F | 1.00069200  | 1.14263800  | -0.04220800 |
| C | -0.94434400 | -0.04257900 | 0.00512500  |
| N | -2.09837700 | 0.02294100  | -0.03726900 |

#### Entry 243

|   |             |             |             |
|---|-------------|-------------|-------------|
| N | -0.10023100 | 0.22209000  | -0.31214600 |
| O | 0.83831200  | -0.43788700 | 0.51494100  |
| C | 2.09420700  | -0.54562800 | -0.17904300 |
| C | -1.32557900 | -0.33145100 | -0.09164600 |
| N | -2.37790500 | -0.79865900 | 0.00836300  |
| H | 2.48254800  | 0.44544900  | -0.42149000 |
| H | 2.75541100  | -1.04608800 | 0.52735700  |
| H | 1.97785100  | -1.14553700 | -1.08334100 |
| O | -0.10581400 | 1.60548100  | -0.03683600 |
| H | -0.34061300 | 1.70388600  | 0.90324700  |

#### 243-radical

|   |             |             |             |
|---|-------------|-------------|-------------|
| N | -0.16451200 | 0.27123000  | 0.00013300  |
| O | 0.20375800  | 1.46339900  | 0.00005400  |
| O | 0.74884800  | -0.80934300 | 0.00039900  |
| C | 2.11324000  | -0.35576700 | -0.00027600 |
| C | -1.43887700 | -0.14472400 | -0.00007500 |

|   |             |             |             |
|---|-------------|-------------|-------------|
| N | -2.55104600 | -0.47130500 | -0.00016700 |
| H | 2.33180900  | 0.22881600  | 0.89426600  |
| H | 2.67882700  | -1.28557300 | 0.00008500  |
| H | 2.33124700  | 0.22778700  | -0.89563400 |

#### Entry 244

|   |             |             |             |
|---|-------------|-------------|-------------|
| N | 1.61071400  | 0.04873600  | 0.39866200  |
| C | 0.19333800  | 0.00663800  | 0.16183900  |
| C | -0.52394300 | 1.20832900  | 0.15184800  |
| C | -0.47961500 | -1.21305700 | 0.04674800  |
| C | -1.90876200 | 1.18212000  | 0.01419500  |
| C | -1.86596100 | -1.22117800 | -0.08897800 |
| C | -2.58733700 | -0.02938200 | -0.10749900 |
| O | 2.20572800  | 1.16394000  | -0.22516100 |
| H | 0.00217900  | 2.14664800  | 0.26334800  |
| H | 0.08019200  | -2.13679700 | 0.05685300  |
| H | -2.45800500 | 2.11683900  | 0.00666800  |
| H | -2.38195600 | -2.16999500 | -0.18432900 |
| H | -3.66577700 | -0.04403900 | -0.21337900 |
| H | 1.99613500  | 1.09892500  | -1.17534700 |
| O | 2.19811900  | -1.12328200 | -0.15453900 |
| H | 2.95513300  | -1.27882100 | 0.42423300  |

#### 244-radical

|   |             |             |             |
|---|-------------|-------------|-------------|
| N | -1.59797300 | -0.12241500 | -0.00006900 |
| O | -2.28785500 | -1.16209700 | 0.00009500  |
| C | -0.20671200 | -0.03686300 | -0.00001500 |
| C | 0.44570200  | 1.20738900  | 0.00001700  |
| C | 0.52713100  | -1.23572000 | -0.00003900 |
| C | 1.83463600  | 1.23660200  | 0.00003700  |
| C | 1.91298900  | -1.17683900 | -0.00001800 |
| C | 2.57552100  | 0.05350700  | 0.00001700  |
| O | -2.27427300 | 1.11373300  | -0.00008200 |
| H | -0.13130900 | 2.12067300  | 0.00003800  |
| H | -0.00252400 | -2.17843100 | -0.00006400 |
| H | 2.34238900  | 2.19420700  | 0.00007000  |
| H | 2.48201600  | -2.09935600 | -0.00003100 |
| H | 3.65836900  | 0.08903000  | 0.00003000  |
| H | -3.20170700 | 0.82924300  | 0.00035000  |

#### Entry 245

|   |             |             |             |
|---|-------------|-------------|-------------|
| N | -1.61127300 | 0.11323700  | -0.42555700 |
| C | -0.19473400 | 0.01644600  | -0.17507200 |
| C | 0.54305000  | 1.19969400  | -0.26140800 |
| C | 0.43572000  | -1.20599100 | 0.04668100  |

|   |             |             |             |
|---|-------------|-------------|-------------|
| C | 1.92285400  | 1.15462700  | -0.10912900 |
| C | 1.82329600  | -1.23702200 | 0.18594600  |
| C | 2.56824600  | -0.06367200 | 0.11266700  |
| F | -2.09693400 | 1.09328500  | 0.58746300  |
| H | 0.03009500  | 2.13672000  | -0.43449300 |
| H | -0.14679700 | -2.11409700 | 0.10174700  |
| H | 2.49708800  | 2.07189400  | -0.16847500 |
| H | 2.31834600  | -2.18620500 | 0.35601600  |
| H | 3.64590000  | -0.09528000 | 0.22389400  |
| O | -2.21797200 | -1.07069200 | -0.07523200 |
| H | -3.04012500 | -1.06420400 | -0.58320100 |

#### 245-radical

|   |             |             |             |
|---|-------------|-------------|-------------|
| N | -1.59797300 | -0.12241500 | -0.00006900 |
| O | -2.28785500 | -1.16209700 | 0.00009500  |
| C | -0.20671200 | -0.03686300 | -0.00001500 |
| C | 0.44570200  | 1.20738900  | 0.00001700  |
| C | 0.52713100  | -1.23572000 | -0.00003900 |
| C | 1.83463600  | 1.23660200  | 0.00003700  |
| C | 1.91298900  | -1.17683900 | -0.00001800 |
| C | 2.57552100  | 0.05350700  | 0.00001700  |
| O | -2.27427300 | 1.11373300  | -0.00008200 |
| H | -0.13130900 | 2.12067300  | 0.00003800  |
| H | -0.00252400 | -2.17843100 | -0.00006400 |
| H | 2.34238900  | 2.19420700  | 0.00007000  |
| H | 2.48201600  | -2.09935600 | -0.00003100 |
| H | 3.65836900  | 0.08903000  | 0.00003000  |
| H | -3.20170700 | 0.82924300  | 0.00035000  |

#### Entry 246

|   |             |             |             |
|---|-------------|-------------|-------------|
| N | -0.23008500 | 0.40153700  | -0.29251900 |
| C | -1.37403500 | -0.41813100 | -0.06329200 |
| O | -0.37452100 | 1.73828700  | 0.12920300  |
| C | 1.09336400  | -0.09675500 | -0.01212400 |
| O | -1.26049400 | -1.61375100 | 0.02409400  |
| C | -2.68145800 | 0.32919000  | 0.00336100  |
| F | 1.33526400  | -1.20342200 | -0.70835800 |
| F | 1.30208500  | -0.35781900 | 1.29125300  |
| F | 1.98802600  | 0.83975200  | -0.37988300 |
| H | -0.15946000 | 2.26747100  | -0.65078000 |
| H | -2.72293600 | 0.93629300  | 0.91039400  |
| H | -3.48246900 | -0.40719400 | 0.01346300  |
| H | -2.80002800 | 1.00395800  | -0.84659100 |

#### 246-radical

|   |             |            |            |
|---|-------------|------------|------------|
| N | -0.25063200 | 0.50857400 | 0.00022200 |
|---|-------------|------------|------------|

|   |             |             |             |
|---|-------------|-------------|-------------|
| C | -1.39788000 | -0.38212500 | 0.00008400  |
| O | -0.38953600 | 1.77037700  | 0.00028900  |
| C | 1.12179500  | -0.05649300 | -0.00005500 |
| O | -1.21746400 | -1.56957600 | 0.00022700  |
| C | -2.71690800 | 0.33239300  | -0.00019900 |
| F | 1.31804200  | -0.80631600 | -1.08694300 |
| F | 1.31833100  | -0.80711300 | 1.08629200  |
| F | 1.99497000  | 0.93959000  | 0.00022400  |
| H | -2.80427500 | 0.97627000  | 0.87755700  |
| H | -3.50554300 | -0.41699300 | -0.00032800 |
| H | -2.80389400 | 0.97619300  | -0.87805400 |

### Entry 247

|   |             |             |             |
|---|-------------|-------------|-------------|
| N | 0.20022200  | 0.48849800  | -0.26476700 |
| C | 1.48050300  | -0.01404100 | -0.05387600 |
| O | 0.10788100  | 1.88116800  | -0.07943000 |
| C | -1.04008700 | -0.17989300 | 0.00995500  |
| O | 2.37974900  | 0.79874300  | 0.11282300  |
| C | 1.69905900  | -1.50204100 | -0.09721600 |
| F | -1.06133300 | -1.32885900 | -0.74322400 |
| F | -1.06829500 | -0.62482900 | 1.32538900  |
| C | -2.26752200 | 0.64754300  | -0.26528000 |
| H | 1.04724100  | 2.10276900  | 0.10382700  |
| H | 1.08325900  | -2.01578200 | 0.64253300  |
| H | 2.75216300  | -1.68109300 | 0.11052800  |
| H | 1.44266600  | -1.90137800 | -1.07972700 |
| H | -3.13623700 | 0.00957400  | -0.10121100 |
| H | -2.25496900 | 0.99821100  | -1.29678400 |
| H | -2.30179200 | 1.50271400  | 0.40608000  |

### 247-radical

|   |             |             |             |
|---|-------------|-------------|-------------|
| N | 0.27950100  | 0.50071400  | 0.06364400  |
| C | 1.40184400  | -0.39704200 | 0.00147600  |
| O | 0.46271800  | 1.74892900  | 0.20267000  |
| C | -1.12852100 | -0.02436900 | -0.04204900 |
| O | 1.21528100  | -1.58894700 | -0.04134600 |
| C | 2.73950900  | 0.28673400  | 0.00626400  |
| F | -1.92762600 | 1.06198200  | -0.09708700 |
| F | -1.22756200 | -0.65184700 | -1.24886600 |
| C | -1.54728700 | -0.93422300 | 1.08404000  |
| H | 2.81153500  | 0.99651100  | -0.82031500 |
| H | 3.50888900  | -0.47775000 | -0.07964800 |
| H | 2.87466900  | 0.85807700  | 0.92718300  |
| H | -2.58888400 | -1.21645400 | 0.92262400  |
| H | -1.46240700 | -0.39999700 | 2.03150900  |

H            -0.92088700   -1.82306900   1.09773100

#### Reference

1. K. B. Wiberg, G. B. Ellison, J. M. McBride and G. A. Petersson, *J. Phys. Chem. A*, 2013, **117**, 213-218.
2. I. Hermans, P. Jacobs and J. Peeters, *PhysChemChemPhys*, 2007, **9**, 686-690
3. P. S. Billone, P. A. Johnson, S. Q. Lin, J. C. Scaiano, G. A. DiLabio and K. U. Ingold, *J. Org. Chem.*, 2011, **76**, 631-636
4. G. da Silva and J. W. Bozzelli, *J. Phys. Chem. C*, 2007, **111**, 5760-5765.
5. Y. Sun, W. S. Zhang, X. B. Hu and H. R. Li, *J. Phys. Chem. B*, 2010, **114**, 4862-4869.
6. K. X. Chen, L. Jia, R. N. Dao, J. Yao, C. M. Wang, Z. R. Chen and H. R. Li, *ChemPhysChem*, 2013, **14**, 179-184.
7. K. X. Chen, L. Jia, C. M. Wang, J. Yao, Z. R. Chen and H. R. Li, *ChemPhysChem*, 2014, **15**, 1673-1680.
8. D. A. Pratt, J. A. Blake, P. Mulder, J. C. Walton, H. G. Korth and K. U. Ingold, *J. Am. Chem. Soc.*, 2004, **126**, 10667-10675.
9. S.-S. Chong, Y. Fu, L. Liu and Q.-X. Guo, *J. Phys. Chem. A*, 2007, **111**, 13112-13125.
10. L. R. Mahoney, Mendenha.Gd and K. U. Ingold, *J. Am. Chem. Soc.*, 1973, **95**, 8610-8614.
11. A. D. Malievskii and A. B. Shapiro, *Kinet. Catal.*, 2005, **46**, 472-494.
12. T. C. Jenkins and M. J. Perkins, *J. Chem. Soc. Perkin Trans. 2*, 1983, **5**, 717-720.
13. R. Amorati, M. Lucarini, M. V, G. F. Pedulli, F. Minisci, F. Recupero, F. Fontana, P. Astolfi and L. Greci, *J. Org. Chem.*, 2003, **68**, 1747-1754.
14. N. Koshino, Y. Cai and J. H. Espenson, *J. Phys. Chem. A*, 2003, **107**, 4262-4267.
15. J. R. Thomas, *J. Am. Chem. Soc.*, 1964, **86**, 1446-1447.
16. T. C. Jenkins and M. J. Perkins, *J. Chem. Soc. Perkin Trans. 2*, 1983, **5**, 717-720.
